# Supplementary material for: Fe(OTf)3-catalyzed annulation of α,β-unsaturated ketoxime acetates with enaminones for the synthesis of functionalized 2,4-diarylpyridines
Source: Royal Society of Chemistry journal article supplement (doi:10.1039/d3qo00685a), 2023-01-01
Supplement: d3qo00685a1.pdf [file d3qo00685a1.pdf]

# Fe(OTf)<sub>3</sub>-Catalyzed Annulation of $\alpha,\beta$ -Unsaturated Ketoxime Acetates with Enaminones for the Synthesis of Functionalized 2,4-Diarylpyridines

Xing-Mei Hu, Jing Yang, Jia-Ming Yang, Bi-Na Shao, Rong Huang\* and Sheng-Jiao Yan\*

*Key Laboratory of Medicinal Chemistry for Natural Resource (Yunnan University),  
Ministry of Education, School of Chemical Science and Technology, Yunnan  
University, Kunming, 650091, P. R. China.*

## Supporting Information

### Table of Contents:

|                                                                                                                    |     |
|--------------------------------------------------------------------------------------------------------------------|-----|
| General Procedure for the Preparation of <b>3</b> .....                                                            | S4  |
| Spectroscopic Data of <b>3a-3p'</b> .....                                                                          | S5  |
| The proposed mechanism of the cascade reaction.....                                                                | S19 |
| <b>Scheme S1.</b> The mechanism were tested by HPLC-HRMS.....                                                      | S20 |
| X-ray Structure and Data of <b>3u</b> .....                                                                        | S21 |
| <b>Figure S1.</b> X-Ray crystal structure of <b>3u</b> , ellipsoid is drawn at the 30% probability level.....      | S21 |
| <b>Table S1.</b> Crystal data and structure refinement for <b>3u</b> .....                                         | S22 |
| <b>Table S2.</b> Bond Lengths for <b>3u</b> .....                                                                  | S23 |
| <b>Figure S2.</b> <sup>1</sup> H NMR (600 MHz, CDCl <sub>3</sub> ) spectra of compound <b>3a</b> .....             | S25 |
| <b>Figure S3.</b> <sup>13</sup> C NMR (150 MHz, CDCl <sub>3</sub> ) spectra of compound <b>3a</b> .....            | S26 |
| <b>Figure S4.</b> <sup>1</sup> H NMR (600 MHz, CDCl <sub>3</sub> ) spectra of compound <b>3b</b> .....             | S27 |
| <b>Figure S5.</b> <sup>13</sup> C NMR (150 MHz, CDCl <sub>3</sub> ) spectra of compound <b>3b</b> .....            | S28 |
| <b>Figure S6.</b> <sup>19</sup> F NMR (564 MHz, CDCl <sub>3</sub> ) spectra of compound <b>3b</b> .....            | S29 |
| <b>Figure S7.</b> <sup>1</sup> H NMR (600 MHz, DMSO- <i>d</i> <sub>6</sub> ) spectra of compound <b>3c</b> .....   | S30 |
| <b>Figure S8.</b> <sup>13</sup> C NMR (150 MHz, DMSO- <i>d</i> <sub>6</sub> ) spectra of compound <b>3c</b> .....  | S31 |
| <b>Figure S9.</b> <sup>19</sup> F NMR (564 MHz, DMSO- <i>d</i> <sub>6</sub> ) spectra of compound <b>3c</b> .....  | S32 |
| <b>Figure S10.</b> <sup>1</sup> H NMR (600 MHz, CDCl <sub>3</sub> ) spectra of compound <b>3d</b> .....            | S33 |
| <b>Figure S11.</b> <sup>13</sup> C NMR (150 MHz, CDCl <sub>3</sub> ) spectra of compound <b>3d</b> .....           | S34 |
| <b>Figure S12.</b> <sup>1</sup> H NMR (600 MHz, CDCl <sub>3</sub> ) spectra of compound <b>3e</b> .....            | S35 |
| <b>Figure S13.</b> <sup>13</sup> C NMR (150 MHz, CDCl <sub>3</sub> ) spectra of compound <b>3e</b> .....           | S36 |
| <b>Figure S14.</b> <sup>1</sup> H NMR (500 MHz, DMSO- <i>d</i> <sub>6</sub> ) spectra of compound <b>3f</b> .....  | S37 |
| <b>Figure S15.</b> <sup>13</sup> C NMR (125 MHz, DMSO- <i>d</i> <sub>6</sub> ) spectra of compound <b>3f</b> ..... | S38 |
| <b>Figure S16.</b> <sup>1</sup> H NMR (400 MHz, CDCl <sub>3</sub> ) spectra of compound <b>3g</b> .....            | S39 |
| <b>Figure S17.</b> <sup>13</sup> C NMR (100 MHz, CDCl <sub>3</sub> ) spectra of compound <b>3g</b> .....           | S40 |
| <b>Figure S18.</b> <sup>1</sup> H NMR (600 MHz, CDCl <sub>3</sub> ) spectra of compound <b>3h</b> .....            | S41 |
| <b>Figure S19.</b> <sup>13</sup> C NMR (150 MHz, CDCl <sub>3</sub> ) spectra of compound <b>3h</b> .....           | S42 |
| <b>Figure S20.</b> <sup>1</sup> H NMR (600 MHz, CDCl <sub>3</sub> ) spectra of compound <b>3i</b> .....            | S43 |
| <b>Figure S21.</b> <sup>13</sup> C NMR (150 MHz, CDCl <sub>3</sub> ) spectra of compound <b>3i</b> .....           | S44 |
| <b>Figure S22.</b> <sup>1</sup> H NMR (400 MHz, CDCl <sub>3</sub> ) spectra of compound <b>3j</b> .....            | S45 |

|                                                                                                          |     |
|----------------------------------------------------------------------------------------------------------|-----|
| <b>Figure S23.</b> $^{13}\text{C}$ NMR (100 MHz, $\text{CDCl}_3$ ) spectra of compound <b>3j</b> .....   | S46 |
| <b>Figure S24.</b> $^1\text{H}$ NMR (600 MHz, $\text{CDCl}_3$ ) spectra of compound <b>3k</b> .....      | S47 |
| <b>Figure S25.</b> $^{13}\text{C}$ NMR (150 MHz, $\text{CDCl}_3$ ) spectra of compound <b>3k</b> .....   | S48 |
| <b>Figure S26.</b> $^{19}\text{F}$ NMR (564 MHz, $\text{CDCl}_3$ ) spectra of compound <b>3k</b> .....   | S49 |
| <b>Figure S27.</b> $^1\text{H}$ NMR (500 MHz, $\text{CDCl}_3$ ) spectra of compound <b>3l</b> .....      | S50 |
| <b>Figure S28.</b> $^{13}\text{C}$ NMR (125 MHz, $\text{CDCl}_3$ ) spectra of compound <b>3l</b> .....   | S51 |
| <b>Figure S29.</b> $^{19}\text{F}$ NMR (470 MHz, $\text{CDCl}_3$ ) spectra of compound <b>3l</b> .....   | S52 |
| <b>Figure S30.</b> $^1\text{H}$ NMR (500 MHz, $\text{DMSO-}d_6$ ) spectra of compound <b>3m</b> .....    | S53 |
| <b>Figure S31.</b> $^{13}\text{C}$ NMR (125 MHz, $\text{DMSO-}d_6$ ) spectra of compound <b>3m</b> ..... | S54 |
| <b>Figure S32.</b> $^{19}\text{F}$ NMR (470 MHz, $\text{DMSO-}d_6$ ) spectra of compound <b>3m</b> ..... | S55 |
| <b>Figure S33.</b> $^1\text{H}$ NMR (500 MHz, $\text{CDCl}_3$ ) spectra of compound <b>3n</b> .....      | S56 |
| <b>Figure S34.</b> $^{13}\text{C}$ NMR (125 MHz, $\text{CDCl}_3$ ) spectra of compound <b>3n</b> .....   | S57 |
| <b>Figure S35.</b> $^{19}\text{F}$ NMR (470 MHz, $\text{CDCl}_3$ ) spectra of compound <b>3n</b> .....   | S58 |
| <b>Figure S36.</b> $^1\text{H}$ NMR (500 MHz, $\text{CDCl}_3$ ) spectra of compound <b>3o</b> .....      | S59 |
| <b>Figure S37.</b> $^{13}\text{C}$ NMR (125 MHz, $\text{CDCl}_3$ ) spectra of compound <b>3o</b> .....   | S60 |
| <b>Figure S38.</b> $^{19}\text{F}$ NMR (470 MHz, $\text{CDCl}_3$ ) spectra of compound <b>3o</b> .....   | S61 |
| <b>Figure S39.</b> $^1\text{H}$ NMR (500 MHz, $\text{CDCl}_3$ ) spectra of compound <b>3p</b> .....      | S62 |
| <b>Figure S40.</b> $^{13}\text{C}$ NMR (125 MHz, $\text{CDCl}_3$ ) spectra of compound <b>3p</b> .....   | S63 |
| <b>Figure S41.</b> $^{19}\text{F}$ NMR (470 MHz, $\text{CDCl}_3$ ) spectra of compound <b>3p</b> .....   | S64 |
| <b>Figure S42.</b> $^1\text{H}$ NMR (500 MHz, $\text{CDCl}_3$ ) spectra of compound <b>3q</b> .....      | S65 |
| <b>Figure S43.</b> $^{13}\text{C}$ NMR (125 MHz, $\text{CDCl}_3$ ) spectra of compound <b>3q</b> .....   | S66 |
| <b>Figure S44.</b> $^{19}\text{F}$ NMR (470 MHz, $\text{CDCl}_3$ ) spectra of compound <b>3q</b> .....   | S67 |
| <b>Figure S45.</b> $^1\text{H}$ NMR (500 MHz, $\text{CDCl}_3$ ) spectra of compound <b>3r</b> .....      | S68 |
| <b>Figure S46.</b> $^{13}\text{C}$ NMR (125 MHz, $\text{CDCl}_3$ ) spectra of compound <b>3r</b> .....   | S69 |
| <b>Figure S47.</b> $^1\text{H}$ NMR (500 MHz, $\text{CDCl}_3$ ) spectra of compound <b>3s</b> .....      | S70 |
| <b>Figure S48.</b> $^{13}\text{C}$ NMR (125 MHz, $\text{CDCl}_3$ ) spectra of compound <b>3s</b> .....   | S71 |
| <b>Figure S49.</b> $^1\text{H}$ NMR (500 MHz, $\text{CDCl}_3$ ) spectra of compound <b>3t</b> .....      | S72 |
| <b>Figure S50.</b> $^{12}\text{C}$ NMR (125 MHz, $\text{CDCl}_3$ ) spectra of compound <b>3t</b> .....   | S73 |
| <b>Figure S51.</b> $^1\text{H}$ NMR (500 MHz, $\text{CDCl}_3$ ) spectra of compound <b>3u</b> .....      | S74 |
| <b>Figure S52.</b> $^{13}\text{C}$ NMR (125 MHz, $\text{CDCl}_3$ ) spectra of compound <b>3u</b> .....   | S75 |
| <b>Figure S53.</b> $^{19}\text{F}$ NMR (470 MHz, $\text{CDCl}_3$ ) spectra of compound <b>3u</b> .....   | S76 |
| <b>Figure S54.</b> $^1\text{H}$ NMR (500 MHz, $\text{DMSO-}d_6$ ) spectra of compound <b>3v</b> .....    | S77 |
| <b>Figure S55.</b> $^{13}\text{C}$ NMR (125 MHz, $\text{DMSO-}d_6$ ) spectra of compound <b>3v</b> ..... | S78 |
| <b>Figure S56.</b> $^{19}\text{F}$ NMR (470 MHz, $\text{DMSO-}d_6$ ) spectra of compound <b>3v</b> ..... | S79 |
| <b>Figure S57.</b> $^1\text{H}$ NMR (500 MHz, $\text{CDCl}_3$ ) spectra of compound <b>3w</b> .....      | S80 |
| <b>Figure S58.</b> $^{13}\text{C}$ NMR (125 MHz, $\text{CDCl}_3$ ) spectra of compound <b>3w</b> .....   | S81 |
| <b>Figure S59.</b> $^1\text{H}$ NMR (500 MHz, $\text{CDCl}_3$ ) spectra of compound <b>3x</b> .....      | S82 |
| <b>Figure S60.</b> $^{13}\text{C}$ NMR (125 MHz, $\text{CDCl}_3$ ) spectra of compound <b>3x</b> .....   | S83 |
| <b>Figure S61.</b> $^{19}\text{F}$ NMR (470 MHz, $\text{CDCl}_3$ ) spectra of compound <b>3x</b> .....   | S84 |
| <b>Figure S62.</b> $^1\text{H}$ NMR (500 MHz, $\text{CDCl}_3$ ) spectra of compound <b>3y</b> .....      | S85 |
| <b>Figure S63.</b> $^{13}\text{C}$ NMR (125 MHz, $\text{CDCl}_3$ ) spectra of compound <b>3y</b> .....   | S86 |
| <b>Figure S64.</b> $^1\text{H}$ NMR (500 MHz, $\text{CDCl}_3$ ) spectra of compound <b>3z</b> .....      | S87 |
| <b>Figure S65.</b> $^{13}\text{C}$ NMR (125 MHz, $\text{CDCl}_3$ ) spectra of compound <b>3z</b> .....   | S88 |
| <b>Figure S66.</b> $^{19}\text{F}$ NMR (470 MHz, $\text{CDCl}_3$ ) spectra of compound <b>3z</b> .....   | S89 |

|                                                                                                            |      |
|------------------------------------------------------------------------------------------------------------|------|
| <b>Figure S67.</b> <sup>1</sup> H NMR (500 MHz, CDCl <sub>3</sub> ) spectra of compound <b>3a'</b> .....   | S90  |
| <b>Figure S68.</b> <sup>13</sup> C NMR (125 MHz, CDCl <sub>3</sub> ) spectra of compound <b>3a'</b> .....  | S91  |
| <b>Figure S69.</b> <sup>1</sup> H NMR (500 MHz, CDCl <sub>3</sub> ) spectra of compound <b>3b'</b> .....   | S92  |
| <b>Figure S70.</b> <sup>13</sup> C NMR (125 MHz, CDCl <sub>3</sub> ) spectra of compound <b>3b'</b> .....  | S93  |
| <b>Figure S71.</b> <sup>19</sup> F NMR (470 MHz, CDCl <sub>3</sub> ) spectra of compound <b>3b'</b> .....  | S94  |
| <b>Figure S72.</b> <sup>1</sup> H NMR (500 MHz, CDCl <sub>3</sub> ) spectra of compound <b>3c'</b> .....   | S95  |
| <b>Figure S73.</b> <sup>13</sup> C NMR (125 MHz, CDCl <sub>3</sub> ) spectra of compound <b>3c'</b> .....  | S96  |
| <b>Figure S74.</b> <sup>19</sup> F NMR (470 MHz, CDCl <sub>3</sub> ) spectra of compound <b>3c'</b> .....  | S97  |
| <b>Figure S75.</b> <sup>1</sup> H NMR (600 MHz, CDCl <sub>3</sub> ) spectra of compound <b>3d'</b> .....   | S98  |
| <b>Figure S76.</b> <sup>13</sup> C NMR (150 MHz, CDCl <sub>3</sub> ) spectra of compound <b>3d'</b> .....  | S99  |
| <b>Figure S77.</b> <sup>1</sup> H NMR (400 MHz, CDCl <sub>3</sub> ) spectra of compound <b>3e'</b> .....   | S100 |
| <b>Figure S78.</b> <sup>13</sup> C NMR (100 MHz, CDCl <sub>3</sub> ) spectra of compound <b>3e'</b> .....  | S101 |
| <b>Figure S79.</b> <sup>1</sup> H NMR (400 MHz, CDCl <sub>3</sub> ) spectra of compound <b>3f'</b> .....   | S102 |
| <b>Figure S80.</b> <sup>13</sup> C NMR (100 MHz, CDCl <sub>3</sub> ) spectra of compound <b>3f'</b> .....  | S103 |
| <b>Figure S81.</b> <sup>1</sup> H NMR (400 MHz, CDCl <sub>3</sub> ) spectra of compound <b>3g'</b> .....   | S104 |
| <b>Figure S82.</b> <sup>13</sup> C NMR (100 MHz, CDCl <sub>3</sub> ) spectra of compound <b>3g'</b> .....  | S105 |
| <b>Figure S83.</b> <sup>1</sup> H NMR (600 MHz, CDCl <sub>3</sub> ) spectra of compound <b>3h'</b> .....   | S106 |
| <b>Figure S84.</b> <sup>13</sup> C NMR (150 MHz, CDCl <sub>3</sub> ) spectra of compound <b>3h'</b> .....  | S107 |
| <b>Figure S85.</b> <sup>1</sup> H NMR (600 MHz, CDCl <sub>3</sub> ) spectra of compound <b>3i'</b> .....   | S108 |
| <b>Figure S86.</b> <sup>13</sup> C NMR (150 MHz, CDCl <sub>3</sub> ) spectra of compound <b>3i'</b> .....  | S109 |
| <b>Figure S87.</b> <sup>1</sup> H NMR (600 MHz, CDCl <sub>3</sub> ) spectra of compound <b>3j'</b> .....   | S110 |
| <b>Figure S88.</b> <sup>13</sup> C NMR (150 MHz, CDCl <sub>3</sub> ) spectra of compound <b>3j'</b> .....  | S111 |
| <b>Figure S89.</b> <sup>1</sup> H NMR (600 MHz, CDCl <sub>3</sub> ) spectra of compound <b>3k'</b> .....   | S112 |
| <b>Figure S90.</b> <sup>13</sup> C NMR (150 MHz, CDCl <sub>3</sub> ) spectra of compound <b>3k'</b> .....  | S113 |
| <b>Figure S91.</b> <sup>1</sup> H NMR (600 MHz, CDCl <sub>3</sub> ) spectra of compound <b>3l'</b> .....   | S114 |
| <b>Figure S92.</b> <sup>13</sup> C NMR (150 MHz, CDCl <sub>3</sub> ) spectra of compound <b>3l'</b> .....  | S115 |
| <b>Figure S93.</b> <sup>1</sup> H NMR (600 MHz, CDCl <sub>3</sub> ) spectra of compound <b>3m'</b> .....   | S116 |
| <b>Figure S94.</b> <sup>13</sup> C NMR (150 MHz, CDCl <sub>3</sub> ) spectra of compound <b>3m'</b> .....  | S117 |
| <b>Figure S95.</b> <sup>1</sup> H NMR (600 MHz, CDCl <sub>3</sub> ) spectra of compound <b>3n'</b> .....   | S118 |
| <b>Figure S96.</b> <sup>13</sup> C NMR (150 MHz, CDCl <sub>3</sub> ) spectra of compound <b>3n'</b> .....  | S119 |
| <b>Figure S97.</b> <sup>1</sup> H NMR (600 MHz, CDCl <sub>3</sub> ) spectra of compound <b>3o'</b> .....   | S120 |
| <b>Figure S98.</b> <sup>13</sup> C NMR (150 MHz, CDCl <sub>3</sub> ) spectra of compound <b>3o'</b> .....  | S121 |
| <b>Figure S99.</b> <sup>1</sup> H NMR (600 MHz, CDCl <sub>3</sub> ) spectra of compound <b>3p'</b> .....   | S122 |
| <b>Figure S100.</b> <sup>13</sup> C NMR (150 MHz, CDCl <sub>3</sub> ) spectra of compound <b>3p'</b> ..... | S123 |
| <b>Figure S101.</b> HPLC extracted ion flow diagrams of the reaction mixture.....                          | S124 |
| <b>Figure S102.</b> HRMS of substrate <b>1e</b> .....                                                      | S125 |
| <b>Figure S103.</b> HRMS of HOAc.....                                                                      | S126 |
| <b>Figure S104.</b> HRMS of substrate <b>2f</b> .....                                                      | S127 |
| <b>Figure S105.</b> HRMS of intermediate <b>4e</b> .....                                                   | S128 |
| <b>Figure S106.</b> HRMS of intermediate <b>5e</b> .....                                                   | S129 |
| <b>Figure S107.</b> HRMS of intermediate <b>7f</b> .....                                                   | S130 |
| <b>Figure S108.</b> HRMS of intermediate <b>8f</b> or <b>9f</b> .....                                      | S131 |
| <b>Figure S109.</b> HRMS of the target compound <b>3f</b> .....                                            | S132 |
| <b>References and Notes</b> .....                                                                          | S133 |

## General Information

All compounds were fully characterised by spectroscopic data. The NMR spectra were recorded on a Bruker DRX600 or DRX500 or DRX400. Chemical shifts ( $\delta$ ) are expressed in ppm,  $J$  values are given in Hz, and deuterated DMSO- $d_6$  was used as solvent, the solvent residue in DMSO- $d_6$  ( $^{13}\text{C}$ NMR: 40.16 ppm,  $^1\text{H}$  NMR, 2.50 ppm) and in  $\text{CDCl}_3$  ( $^{13}\text{C}$ NMR: 77.16 ppm,  $^1\text{H}$  NMR, 7.26 ppm). IR spectra were recorded on a FT-IR Thermo Nicolet Avatar 360 using KBr pellet. The reactions were monitored by thin layer chromatography (TLC) using silica gel GF<sub>254</sub>. The melting points were determined on a XT-4A melting point apparatus and are uncorrected. HRMs were performed on an Agilent LC/Msd TOF instrument.

The  $\alpha,\beta$ -unsaturated ketoximes **1** were synthesized by known literature procedures.<sup>1</sup> The enaminones **2** were synthesized by known literature procedures.<sup>2</sup> All the other chemicals and solvents were used as received without further purification unless otherwise stated. Two kinds of reagents which were used in the experiment were commercially available reagents.

### General Procedure for the Preparation of 3

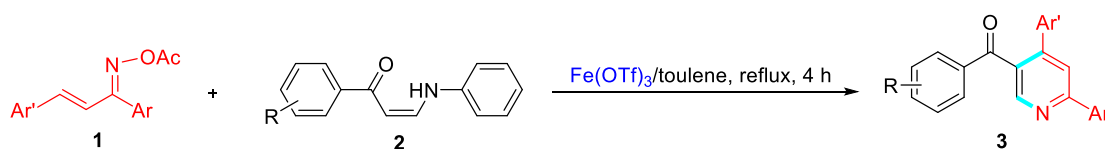

A round-bottomed flask was charged with  $\alpha,\beta$ -unsaturated ketoximes **1** (1.0 mmol, 1.0 equiv), enaminones **2** (1.1 mmol, 1.1 equiv), and  $\text{Fe}(\text{OTf})_3$  (0.05 mmol, 0.05 equiv). The flask was supplemented with toluene (3 mL), and the mixture was stirred under reflux (in an oil bath) for 4 h. At this stage, the substrates were completely consumed in the reaction system. After cooling the reaction mixture to room temperature, it was extracted with ethyl acetate ( $3 \times 15$  mL). The organic layer was washed with water and brine. Then, the combined organic phases were dried over  $\text{MgSO}_4$ . Finally, the organic phases were filtered and concentrated under reduced pressure to obtain the crude product. Finally, the product **3** was isolated from the crude mixture by flash column chromatography over silica gel using a mixture of petroleum ether/ethyl acetate (8:1–6:1, v/v) as the eluent.

## Spectroscopic Data of 3a-3p'

### **(4,6-Diphenylpyridin-3-yl)(4-nitrophenyl)methanone (3a)**

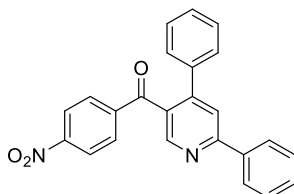

White solid (86%, 328 mg); Mp: 163.4–163.9 °C; IR (KBr): 3788, 3574, 2784, 1767, 1666, 1529, 1493, 1244, 577  $\text{cm}^{-1}$ ;  $^1\text{H}$  NMR (600 MHz,  $\text{CDCl}_3$ ):  $\delta$  = 8.90 (s, 1H, ArH), 8.14–8.12 (m, 2H, ArH), 8.08–8.06 (m, 2H, ArH), 7.88 (s, 1H, ArH), 7.76–7.74 (m, 2H, ArH), 7.56–7.49 (m, 3H, ArH), 7.30–7.23 (m, 5H, ArH).  $^{13}\text{C}$  NMR (150 MHz,  $\text{CDCl}_3$ ):  $\delta$  = 195.2, 160.0, 150.1, 149.9, 149.8, 141.8, 138.1, 137.6, 131.5, 130.4, 130.1, 129.2, 129.0, 128.9, 128.7, 127.4, 123.4, 120.8. HRMS (TOF  $\text{ES}^+$ )  $m/z$ :  $[\text{M}+\text{H}]^+$  calcd for  $\text{C}_{24}\text{H}_{16}\text{N}_2\text{O}_3$  381.1234; found, 381.1342.

### **(4,6-Diphenylpyridin-3-yl)(4-(trifluoromethyl)phenyl)methanone (3b)**

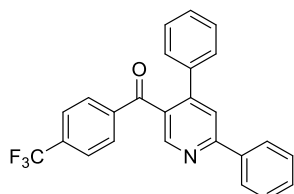

White solid (81%, 327 mg); Mp: 160.8–161.3 °C; IR (KBr): 3865, 2930, 1667, 1584, 1411, 1323, 1134, 775, 699  $\text{cm}^{-1}$ ;  $^1\text{H}$  NMR (600 MHz,  $\text{CDCl}_3$ ):  $\delta$  = 8.77 (s, 1H, ArH), 8.05–8.03 (m, 2H, ArH), 7.79 (s, 1H, ArH), 7.68–7.67 (m, 2H, ArH), 7.47–7.40 (m, 4H, ArH), 7.23–7.17 (m, 6H, ArH).  $^{13}\text{C}$  NMR (150 MHz,  $\text{CDCl}_3$ ):  $\delta$  = 195.6, 159.6, 149.9, 149.9, 140.0, 138.3, 137.7, 134.4, 134.2, 131.9, 129.9, 128.9 (d,  $J$  = 7.5 Hz), 128.6, 127.3, 125.3, 125.3, 122.5, 120.9.  $^{19}\text{F}$  NMR (560 MHz,  $\text{CDCl}_3$ ):  $\delta$  = –63.2 ppm. HRMS (TOF  $\text{ES}^+$ )  $m/z$ :  $[\text{M}+\text{H}]^+$  calcd for  $\text{C}_{25}\text{H}_{16}\text{F}_3\text{NO}$  404.1257; found, 404.1262.

### **(4,6-Diphenylpyridin-3-yl)(4-fluorophenyl)methanone (3c)**

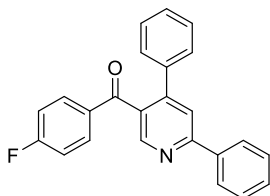

White solid (88%, 312 mg); Mp: 142.0–142.5 °C; IR (KBr): 3854, 1799, 1662, 1595, 1407, 706, 547  $\text{cm}^{-1}$ ;  $^1\text{H}$  NMR (600 MHz,  $\text{DMSO}-d_6$ ):  $\delta$  = 8.79 (s, 1H, ArH), 8.29–8.28 (m, 2H, ArH), 8.13 (s, 1H, ArH), 7.74–7.72 (m, 2H, ArH), 7.57–7.52 (m, 3H, ArH), 7.41–7.40 (m, 2H, ArH), 7.35–7.31 (m, 3H, ArH), 7.22–7.19 (m, 2H, ArH).  $^{13}\text{C}$  NMR (150 MHz,  $\text{DMSO}-d_6$ ):  $\delta$  = 195.1, 165.5 (d,  $J$  = 252.0 Hz), 158.4, 149.5, 149.4 (d,  $J$  = 10.5 Hz), 138.3, 137.9, 133.9, 133.0 (d,  $J$  = 9.0 Hz), 132.7, 130.3, 129.3, 129.2, 129.1, 129.1, 127.6, 121.1, 116.2 (d,  $J$  = 22.5 Hz).  $^{19}\text{F}$  NMR (560 MHz,  $\text{DMSO}-d_6$ ):  $\delta$  = –104.9 ppm. HRMS (TOF  $\text{ES}^+$ )  $m/z$ :  $[\text{M}+\text{H}]^+$  calcd for  $\text{C}_{24}\text{H}_{16}\text{FNO}$  354.1289; found, 354.1302.

**(4-Chlorophenyl)(4,6-diphenylpyridin-3-yl)methanone (3d)**

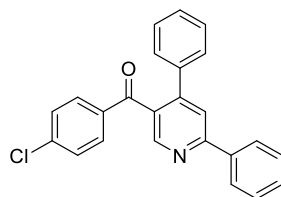

White solid (89%, 330 mg); Mp: 194.4–194.9 °C; IR (KBr): 3877, 1721, 1659, 1586, 1488, 757, 586  $\text{cm}^{-1}$ ;  $^1\text{H}$  NMR (600 MHz,  $\text{CDCl}_3$ ):  $\delta$  = 8.81 (s, 1H, ArH), 8.12–8.10 (m, 2H, ArH), 7.85 (s, 1H, ArH), 7.85–7.61 (m, 2H, ArH), 7.54–7.47 (m, 3H, ArH), 7.33–7.25 (m, 7H, ArH).  $^{13}\text{C}$  NMR (150 MHz,  $\text{CDCl}_3$ ):  $\delta$  = 195.4, 159.3, 149.6, 149.6, 139.8, 138.4, 137.8, 135.5, 132.2, 131.1, 129.8, 129.0, 129.0, 128.8, 128.7, 128.6, 127.3, 120.9. HRMS (TOF  $\text{ES}^+$ )  $m/z$ :  $[\text{M}+\text{H}]^+$  calcd for  $\text{C}_{24}\text{H}_{16}\text{ClNO}$  370.0993; found, 370.1003.

**(4-Bromophenyl)(4,6-diphenylpyridin-3-yl)methanone (3e)**

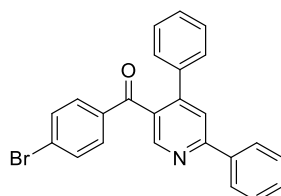

White solid (79%, 327 mg); Mp: 191.9–192.4 °C; IR (KBr): 3862, 3603, 3534, 1705, 1663, 1577, 1450, 679, 584  $\text{cm}^{-1}$ ;  $^1\text{H}$  NMR (600 MHz,  $\text{CDCl}_3$ ):  $\delta$  = 8.80 (s, 1H, ArH), 8.12–8.11 (m, 2H, ArH), 8.11 (s, 1H, ArH), 7.85–7.43 (m, 7H, ArH), 7.33–7.26 (m, 5H, ArH).  $^{13}\text{C}$  NMR (150 MHz,  $\text{CDCl}_3$ ):  $\delta$  = 195.6, 159.3, 149.7, 149.6, 138.4, 137.8, 135.9, 132.2, 131.7, 131.2, 129.8, 129.8, 129.0, 128.8, 128.8, 128.6, 127.3, 120.9. HRMS (TOF  $\text{ES}^+$ )  $m/z$ :  $[\text{M}+\text{H}]^+$  calcd for  $\text{C}_{24}\text{H}_{16}\text{BrNO}$  414.0488; found, 414.0498.

**(4,6-Diphenylpyridin-3-yl)(phenyl)methanone (3f)**

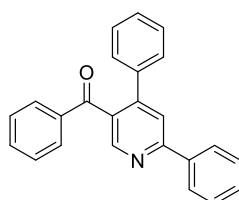

White solid (88%, 295 mg); Mp: 129.0–129.5 °C; IR (KBr): 3842, 1722, 1650, 1598, 1453, 841, 756, 565  $\text{cm}^{-1}$ ;  $^1\text{H}$  NMR (500 MHz,  $\text{DMSO}-d_6$ ):  $\delta$  = 8.80 (s, 1H, ArH), 8.29–8.27 (m, 2H, ArH), 8.13 (s, 1H, ArH), 7.61–7.52 (m, 8H, ArH), 7.41–7.33 (m, 5H, ArH);  $^{13}\text{C}$  NMR (125 MHz,  $\text{DMSO}-d_6$ ):  $\delta$  = 195.6, 158.5, 149.6, 149.5, 138.2, 137.8, 136.1, 132.5, 132.2, 131.8, 130.4, 129.4, 129.3, 129.2, 129.1, 128.2, 127.7, 121.1; HRMS (TOF  $\text{ES}^+$ )  $m/z$ :  $[\text{M}+\text{H}]^+$  calcd for  $\text{C}_{24}\text{H}_{18}\text{NO}$  336.1383; found, 336.1386.

**(4,6-Diphenylpyridin-3-yl)(p-tolyl)methanone (3g)**

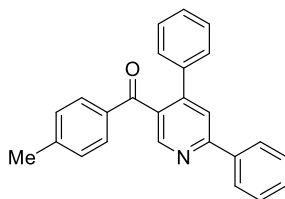

White solid (86%, 301 mg); Mp: 142.2–142.7 °C; IR (KBr): 3820, 1712, 1655, 1598, 1450, 852, 755, 562  $\text{cm}^{-1}$ ;  $^1\text{H}$  NMR (400 MHz, DMSO- $d_6$ ):  $\delta$  = 8.78 (s, 1H, ArH), 8.12–8.10 (m, 2H, ArH), 7.84 (s, 1H, ArH), 7.64–7.62 (m, 2H, ArH), 7.53–7.47 (m, 3H, ArH), 7.37–7.25 (m, 5H, ArH), 7.13–7.11 (m, 2H, ArH), 2.34 (s, 3H, CH<sub>3</sub>);  $^{13}\text{C}$  NMR (100 MHz, DMSO- $d_6$ ):  $\delta$  = 196.1, 158.8, 149.7, 149.5, 144.4, 138.7, 138.0, 134.6, 132.9, 130.1, 129.7, 129.1, 128.9, 128.7, 128.6, 127.2, 121.1, 21.7; HRMS (TOF ES<sup>+</sup>) m/z: [M+H]<sup>+</sup> calcd for C<sub>25</sub>H<sub>19</sub>NO 350.1539; found, 350.1536.

#### (4,6-Diphenylpyridin-3-yl)(4-ethylphenyl)methanone (3h)

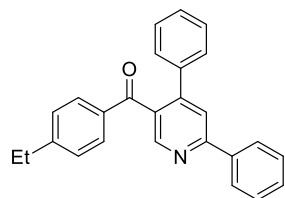

White solid (84%, 306 mg); Mp: 141.5–142.0 °C; IR (KBr): 3884, 1730, 1657, 1598, 1508, 1469, 1293, 697, 554  $\text{cm}^{-1}$ ;  $^1\text{H}$  NMR (600 MHz, CDCl<sub>3</sub>):  $\delta$  = 8.77 (s, 1H, ArH), 8.11–8.09 (m, 2H, ArH), 7.84 (s, 1H, ArH), 7.84–7.69 (m, 2H, ArH), 7.54–7.46 (m, 3H, ArH), 7.38–7.31 (m, 2H, ArH), 7.30–7.27 (m, 3H, ArH), 6.80–6.78 (m, 2H, ArH), 4.06–4.02 (m, 2H, CH<sub>2</sub>), 1.42–1.39 (m, 3H, CH<sub>3</sub>).  $^{13}\text{C}$  NMR (150 MHz, CDCl<sub>3</sub>):  $\delta$  = 196.1, 158.8, 150.5, 149.7, 149.5, 138.6, 138.0, 134.9, 132.9, 130.2, 129.7, 128.9, 128.7, 128.6, 128.6, 127.9, 127.2, 121.1, 29.0, 15.0. HRMS (TOF ES<sup>+</sup>) m/z: [M+H]<sup>+</sup> calcd for C<sub>26</sub>H<sub>21</sub>NO 364.1696; found, 364.1699.

#### (4,6-diphenylpyridin-3-yl)(4-methoxyphenyl)methanone (3i)

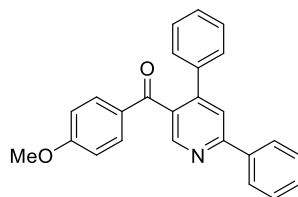

White solid (85%, 311 mg); Mp: 148.5–149.0 °C; IR (KBr): 3811, 2917, 1721, 1657, 1597, 1449, 1149, 788, 549  $\text{cm}^{-1}$ ;  $^1\text{H}$  NMR (500 MHz, CDCl<sub>3</sub>):  $\delta$  = 8.80 (s, 1H, ArH), 8.14–8.12 (m, 2H, ArH), 7.87 (s, 1H, ArH), 7.87–7.73 (m, 2H, ArH), 7.73–7.48 (m, 3H, ArH), 7.41–7.38 (m, 2H, ArH), 7.33–7.28 (m, 3H, ArH), 6.84–6.81 (m, 2H, ArH), 3.83 (s, 3H, OCH<sub>3</sub>).  $^{13}\text{C}$  NMR (125 MHz, CDCl<sub>3</sub>):  $\delta$  = 195.0, 163.8, 158.7, 149.4, 149.4, 138.6, 138.1, 133.0, 132.3, 130.2, 129.6, 128.9, 128.7, 128.7, 128.6, 127.2, 121.0, 113.7, 55.5. HRMS (TOF ES<sup>+</sup>) m/z: [M+H]<sup>+</sup> calcd for C<sub>25</sub>H<sub>19</sub>NO<sub>2</sub> 366.1489; found, 366.1491.

#### (4-Chloro-3-methylphenyl)(4,6-diphenylpyridin-3-yl)methanone (3j)

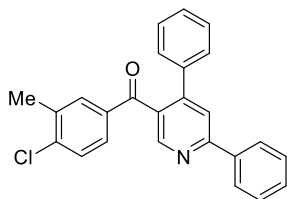

White solid (85%, 326 mg); Mp: 166.1–166.6 °C; IR (KBr): 3866, 1712, 1653, 1589, 1452, 760, 562  $\text{cm}^{-1}$ ;  $^1\text{H}$  NMR (400 MHz,  $\text{CDCl}_3$ ):  $\delta$  = 8.79 (s, 1H, ArH), 8.12–8.10 (m, 2H, ArH), 8.10 (s, 1H, ArH), 7.85–7.43 (m, 5H, ArH), 7.35–7.25 (m, 6H, ArH);  $^{13}\text{C}$  NMR (100 MHz,  $\text{CDCl}_3$ ):  $\delta$  = 195.5, 159.2, 149.8, 149.6, 140.0, 138.4, 137.9, 136.4, 135.4, 132.3, 132.2, 129.8, 129.2, 129.0, 128.9, 128.8, 128.6, 128.6, 127.3, 121.0, 19.9; HRMS (TOF  $\text{ES}^+$ )  $m/z$ :  $[\text{M}+\text{H}]^+$  calcd for  $\text{C}_{25}\text{H}_{18}\text{ClNO}$  384.1150; found, 384.1154.

**(6-(4-Fluorophenyl)-4-phenylpyridin-3-yl)(4-(trifluoromethyl)phenyl)methanone (3k)**

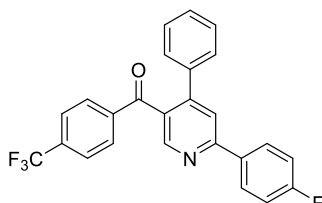

White solid (80%, 338 mg); Mp: 140.5–150.0 °C; IR (KBr): 3864, 3609, 2924, 1762, 1668, 1583, 1412, 1322, 1139, 845, 629  $\text{cm}^{-1}$ ;  $^1\text{H}$  NMR (500 MHz,  $\text{CDCl}_3$ ):  $\delta$  = 8.83 (s, 1H, ArH), 8.83–8.11 (m, 2H, ArH), 7.82 (s, 1H, ArH), 7.75–7.74 (m, 2H, ArH), 7.54–7.53 (m, 2H, ArH), 7.30–7.25 (m, 5H, ArH), 7.23–7.19 (m, 2H, ArH).  $^{13}\text{C}$  NMR (125 MHz,  $\text{CDCl}_3$ ):  $\delta$  = 195.5, 164.1 (d,  $J$  = 207.5 Hz), 158.5, 149.9 (d,  $J$  = 17.5 Hz), 139.9, 137.6, 134.0, 131.8, 129.9, 129.2 (d,  $J$  = 7.5 Hz), 129.1, 128.8, 128.6, 125.3, 125.3, 123.4 (d,  $J$  = 226.3 Hz), 120.5, 116.0 (d,  $J$  = 18.8 Hz).  $^{19}\text{F}$  NMR (470 MHz,  $\text{CDCl}_3$ ):  $\delta$  = –63.2, –111.2 ppm. HRMS (TOF  $\text{ES}^+$ )  $m/z$ :  $[\text{M}+\text{H}]^+$  calcd for  $\text{C}_{25}\text{H}_{15}\text{F}_4\text{NO}$  422.0918; found, 422.0919.

**(4,6-Bis(4-fluorophenyl)pyridin-3-yl)(4-fluorophenyl)methanone (3l)**

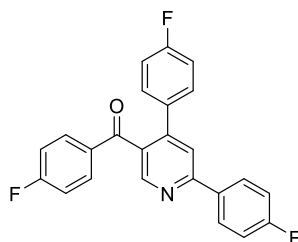

White solid (77%, 300 mg); Mp: 151.5–152.0 °C; IR (KBr): 3898, 3351, 2916, 1708, 1667, 1599, 1509, 1412, 1228, 1154, 843  $\text{cm}^{-1}$ ;  $^1\text{H}$  NMR (500 MHz,  $\text{CDCl}_3$ ):  $\delta$  = 8.77 (s, 1H, ArH), 8.12–8.09 (m, 2H, ArH), 7.76 (s, 1H, ArH), 7.72–7.69 (m, 2H, ArH), 7.32–7.29 (m, 2H, ArH), 7.21–7.17 (m, 2H, ArH), 7.01–6.97 (m, 4H, ArH).  $^{13}\text{C}$  NMR (125 MHz,  $\text{CDCl}_3$ ):  $\delta$  = 194.7, 165.9 (d,  $J$  = 255.0 Hz), 164.0 (d,  $J$  = 248.8 Hz), 163.1 (d,  $J$  = 248.8 Hz), 158.1, 149.6, 148.6, 134.4, 133.8, 133.4, 132.4 (d,  $J$  = 10.0 Hz), 132.3 (d,  $J$  = 20.0 Hz), 130.4 (d,  $J$  = 7.5 Hz), 129.2 (d,  $J$  = 8.8 Hz), 120.5, 115.9 (d,  $J$  = 21.3



Hz), 115.9 (d,  $J = 22.5$  Hz), 115.7 (d,  $J = 22.5$  Hz).  $^{19}\text{F}$  NMR (470 MHz,  $\text{CDCl}_3$ ):  $\delta = -103.7, -111.3, -112.0$  ppm. HRMS (TOF  $\text{ES}^+$ )  $m/z$ :  $[\text{M}+\text{H}]^+$  calcd for  $\text{C}_{24}\text{H}_{14}\text{F}_3\text{NO}$  390.1100; found, 390.1099.

**(4-Fluorophenyl)(6-(4-fluorophenyl)-4-phenylpyridin-3-yl)methanone (3m)**

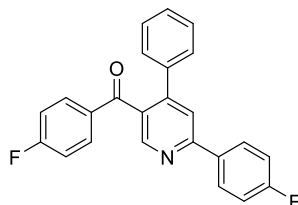

White solid (85%, 317 mg); Mp: 145.0–145.5 °C; IR (KBr): 3690, 2360, 1721, 1662, 1598, 1408, 570  $\text{cm}^{-1}$ ;  $^1\text{H}$  NMR (500 MHz,  $\text{DMSO}-d_6$ ):  $\delta = 8.77\text{--}8.75$  (m, 1H, ArH), 8.36–8.33 (m, 2H, ArH), 8.13 (s, 1H, ArH), 7.74–7.71 (m, 2H, ArH), 7.41–7.29 (m, 8H, ArH), 7.22–7.18 (m, 2H, ArH).  $^{13}\text{C}$  NMR (125 MHz,  $\text{DMSO}-d_6$ ):  $\delta = 195.0, 165.7$  (d,  $J = 212.5$  Hz), 164.5, 162.8, 157.4, 149.5, 149.5, 137.8, 134.8, 132.9 (d,  $J = 10.0$  Hz), 132.6, 129.9 (d,  $J = 8.8$  Hz), 129.2 (d,  $J = 12.5$  Hz), 129.1 (d,  $J = 8.8$  Hz), 120.9, 116.3, 116.2 (d,  $J = 16.3$  Hz), 116.1. HRMS (TOF  $\text{ES}^+$ )  $m/z$ :  $[\text{M}+\text{H}]^+$  calcd for  $\text{C}_{24}\text{H}_{15}\text{F}_2\text{NO}_3$  372.1194; found, 372.1202.

**(4-Fluorophenyl)(4-(4-fluorophenyl)-6-phenylpyridin-3-yl)methanone (3n)**

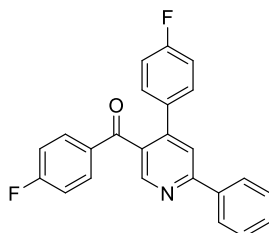

White solid (86%, 320 mg); Mp: 154.3–154.8 °C; IR (KBr): 3948, 1723, 1658, 1596, 1410, 1282, 1106, 547  $\text{cm}^{-1}$ ;  $^1\text{H}$  NMR (500 MHz,  $\text{CDCl}_3$ ):  $\delta = 8.80$  (s, 1H, ArH), 8.11–8.10 (m, 2H, ArH), 7.81 (s, 1H, ArH), 7.74–7.70 (m, 2H, ArH), 7.55–7.47 (m, 3H, ArH), 7.33–7.26 (m, 2H, ArH), 7.02–6.97 (m, 4H, ArH).  $^{13}\text{C}$  NMR (125 MHz,  $\text{CDCl}_3$ ):  $\delta = 194.9, 165.9$  (d,  $J = 255$  Hz), 163.0 (d,  $J = 248.8$  Hz), 159.3, 149.6, 148.5, 138.3, 133.9, 133.5, 132.4 (d,  $J = 8.8$  Hz), 132.3, 130.4 (d,  $J = 7.5$  Hz), 129.9, 129.0, 127.3, 120.8, 115.9 (d,  $J = 22.5$  Hz), 115.6.  $^{19}\text{F}$  NMR (470 MHz,  $\text{CDCl}_3$ ):  $\delta = -103.7, -112.1$  ppm. HRMS (TOF  $\text{ES}^+$ )  $m/z$ :  $[\text{M}+\text{H}]^+$  calcd for  $\text{C}_{24}\text{H}_{15}\text{F}_2\text{NO}$  372.1194; found, 372.1200.

**(4-Fluorophenyl)(4-(4-methoxyphenyl)-6-phenylpyridin-3-yl)methanone (3o)**

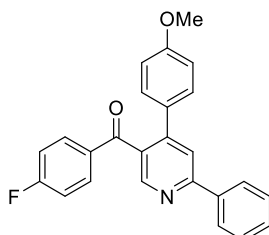

White solid (77%, 296 mg); Mp: 141.0–141.5 °C; IR (KBr): 3863, 1708, 1662, 1534, 1405, 1145, 710, 669, 576  $\text{cm}^{-1}$ ;  $^1\text{H}$  NMR (500 MHz,  $\text{CDCl}_3$ ):  $\delta = 8.79$  (s, 1H, ArH),

8.79–8.12 (m, 2H, ArH), 7.84 (s, 1H, ArH), 7.75–7.72 (m, 2H, ArH), 7.55–7.49 (m, 3H, ArH), 7.31–7.28 (m, 2H, ArH), 7.01–6.97 (m, 2H, ArH), 6.84–6.82 (m, 2H, ArH), 3.76 (s, 3H, OCH<sub>3</sub>). <sup>13</sup>C NMR (125 MHz, CDCl<sub>3</sub>): δ = 195.3, 165.7 (d, *J* = 253.8 Hz), 160.2, 159.1, 149.6, 149.1, 138.5, 133.5, 132.4 (d, *J* = 10.0 Hz), 132.2, 130.1, 130.0, 129.7, 128.1 (d, *J* = 208.8 Hz), 120.7, 115.6 (d, *J* = 21.3 Hz), 114.3, 55.3. <sup>19</sup>F NMR (470 MHz, CDCl<sub>3</sub>): δ = -104.2 ppm. HRMS (TOF ES<sup>+</sup>) *m/z*: [M+H]<sup>+</sup> calcd for C<sub>25</sub>H<sub>18</sub>FNO<sub>2</sub> 384.1394; found, 384.1402.

**(4-Fluorophenyl)(4-(4-fluorophenyl)-6-(*p*-tolyl)pyridin-3-yl)methanone (3p)**

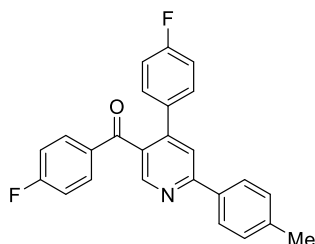

White solid (86%, 332 mg); Mp: 110.4–110.9 °C; IR (KBr): 3898, 1723, 1667, 1538, 1410, 635, 573 cm<sup>-1</sup>; <sup>1</sup>H NMR (500 MHz, CDCl<sub>3</sub>): δ = 8.77 (s, 1H, ArH), 8.02–8.00 (m, 2H, ArH), 7.78 (s, 1H, ArH), 7.73–7.70 (m, 2H, ArH), 7.33–7.29 (m, 4H, ArH), 7.00–6.96 (m, 4H, ArH), 2.43 (s, 3H, CH<sub>3</sub>). <sup>13</sup>C NMR (125 MHz, CDCl<sub>3</sub>): δ = 194.9, 165.8 (d, *J* = 255.0 Hz), 163.0 (d, *J* = 247.5 Hz), 159.3, 149.6, 148.5, 140.1, 135.5, 134.1, 134.0, 133.6, 132.5 (d, *J* = 8.8 Hz), 132.0, 130.4 (d, *J* = 8.8 Hz), 129.7, 127.1, 120.5, 115.9 (d, *J* = 21.3 Hz), 115.7 (d, *J* = 22.5 Hz), 21.4. <sup>19</sup>F NMR (470 MHz, CDCl<sub>3</sub>): δ = -103.9, -112.2 ppm. HRMS (TOF ES<sup>+</sup>) *m/z*: [M+H]<sup>+</sup> calcd for C<sub>25</sub>H<sub>17</sub>F<sub>2</sub>NO 386.1351; found, 386.1357.

**(4-Chlorophenyl)(6-(4-fluorophenyl)-4-phenylpyridin-3-yl)methanone (3q)**

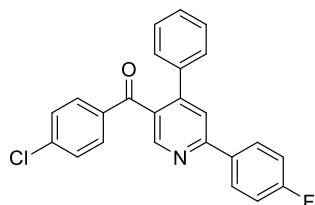

White solid (86%, 334 mg); Mp: 189.3–189.8 °C; IR (KBr): 3874, 1728, 1664, 1577, 1455, 762, 593 cm<sup>-1</sup>; <sup>1</sup>H NMR (500 MHz, CDCl<sub>3</sub>): δ = 8.78 (s, 1H, ArH), 8.78–8.09 (m, 2H, ArH), 7.80 (s, 1H, ArH), 7.62–7.60 (m, 2H, ArH), 7.33–7.21 (m, 7H, ArH), 7.20–7.18 (m, 2H, ArH). <sup>13</sup>C NMR (125 MHz, CDCl<sub>3</sub>): δ = 195.3, 164.0 (d, *J* = 248.8 Hz), 158.2, 149.8, 149.6, 139.8, 137.7, 135.4, 134.5, 134.5, 132.1, 131.1, 129.2 (d, *J* = 8.8 Hz), 129.0, 128.8, 128.6 (d, *J* = 17.5 Hz), 120.6, 115.9 (d, *J* = 21.3 Hz). <sup>19</sup>F NMR (470 MHz, DMSO-*d*<sub>6</sub>): δ = -111.4 ppm. HRMS (TOF ES<sup>+</sup>) *m/z*: [M+H]<sup>+</sup> calcd for C<sub>24</sub>H<sub>15</sub>F<sub>2</sub>NO<sub>3</sub> 372.1194; found, 372.1202. HRMS (TOF ES<sup>+</sup>) *m/z*: [M+H]<sup>+</sup> calcd for C<sub>24</sub>H<sub>15</sub>ClFNO 388.0899; found, 388.0902.

**(4-Chlorophenyl)(4-(4-methoxyphenyl)-6-phenylpyridin-3-yl)methanone (3r)**

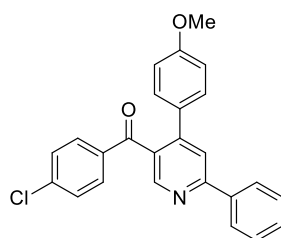

White solid (77%, 308 mg); Mp: 163.8–164.3 °C; IR (KBr): 3839, 2930, 2375, 1729, 1656, 1593, 1468, 1298, 825, 690, 559  $\text{cm}^{-1}$ ;  $^1\text{H}$  NMR (500 MHz,  $\text{CDCl}_3$ ):  $\delta$  = 8.76 (s, 1H, ArH), 8.11–8.09 (m, 2H, ArH), 7.82 (s, 1H, ArH), 7.64–7.62 (m, 2H, ArH), 7.54–7.48 (m, 3H, ArH), 7.29–7.26 (m, 4H, ArH), 6.82–6.80 (m, 2H, ArH), 3.77 (s, 3H,  $\text{OCH}_3$ ).  $^{13}\text{C}$  NMR (125 MHz,  $\text{CDCl}_3$ ):  $\delta$  = 195.7, 160.3, 159.2, 149.6, 149.2, 139.8, 138.5, 135.5, 132.1, 131.1, 130.1, 129.9, 129.7, 128.9, 128.7, 127.2, 120.7, 114.3, 55.3. HRMS (TOF  $\text{ES}^+$ )  $m/z$ :  $[\text{M}+\text{H}]^+$  calcd for  $\text{C}_{25}\text{H}_{18}\text{ClNO}_2$  400.1099; found, 400.1104.

**(4-Chlorophenyl)(6-(4-methoxyphenyl)-4-phenylpyridin-3-yl)methanone (3s)**

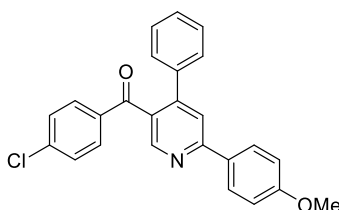

White solid (84%, 336 mg); Mp: 155.0–150.5 °C; IR (KBr): 3813, 1723, 1656, 1585, 1495, 841, 709, 566  $\text{cm}^{-1}$ ;  $^1\text{H}$  NMR (500 MHz,  $\text{CDCl}_3$ ):  $\delta$  = 8.76 (s, 1H, ArH), 8.09–8.07 (m, 2H, ArH), 7.78 (s, 1H, ArH), 7.62–7.60 (m, 2H, ArH), 7.32–7.25 (m, 7H, ArH), 7.05–7.03 (m, 2H, ArH).  $^{13}\text{C}$  NMR (125 MHz,  $\text{CDCl}_3$ ):  $\delta$  = 195.4, 161.2, 158.9, 149.6, 139.6, 138.0, 135.6, 131.5, 131.1, 130.9, 128.8, 128.7, 128.7, 128.7, 128.6, 128.6, 120.0, 114.4, 55.4. HRMS (TOF  $\text{ES}^+$ )  $m/z$ :  $[\text{M}+\text{H}]^+$  calcd for  $\text{C}_{25}\text{H}_{18}\text{ClNO}_2$  400.1099; found, 400.1101.

**(4-Bromophenyl)(4-(4-nitrophenyl)-6-phenylpyridin-3-yl)methanone (3t)**

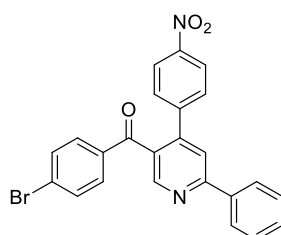

White solid (82%, 376 mg); Mp: 186.5–187.0 °C; IR (KBr): 3824, 3383, 3164, 1736, 1662, 1585, 1450, 1280, 823, 679, 556  $\text{cm}^{-1}$ ;  $^1\text{H}$  NMR (500 MHz,  $\text{CDCl}_3$ ):  $\delta$  = 8.84 (s, 1H, ArH), 8.20–8.18 (m, 2H, ArH), 8.12–8.11 (m, 2H, ArH), 7.83 (s, 1H, ArH), 7.63–7.61 (m, 2H, ArH), 7.55–7.49 (m, 2H, ArH).  $^{13}\text{C}$  NMR (125 MHz,  $\text{CDCl}_3$ ):  $\delta$  = 194.4, 159.7, 149.9, 147.9, 147.8, 144.4, 137.8, 135.6, 132.1, 131.6, 131.3, 130.3, 129.5, 129.3, 129.1, 127.3, 124.0, 120.9. HRMS (TOF  $\text{ES}^+$ )  $m/z$ :  $[\text{M}+\text{H}]^+$  calcd for  $\text{C}_{24}\text{H}_{15}\text{BrN}_2\text{O}_3$  459.0339; found, 459.0343.

**(4,6-Bis(4-fluorophenyl)pyridin-3-yl)(phenyl)methanone (3u)**

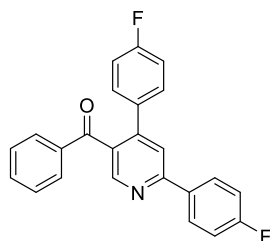

White solid (86%, 320 mg); Mp: 161.0–161.5 °C; IR (KBr): 3836, 1707, 1661, 1533, 1410, 763, 685, 548  $\text{cm}^{-1}$ ;  $^1\text{H}$  NMR (500 MHz,  $\text{CDCl}_3$ ):  $\delta$  = 8.78 (s, 1H, ArH), 8.12–8.09 (m, 2H, ArH), 7.76 (s, 1H, ArH), 7.70–7.69 (m, 2H, ArH), 7.50–7.47 (m, 1H, ArH), 7.35–7.30 (m, 4H, ArH), 7.22–7.19 (m, 2H, ArH), 6.99–6.95 (m, 2H, ArH).  $^{13}\text{C}$  NMR (125 MHz,  $\text{CDCl}_3$ ):  $\delta$  = 195.3, 163.0 (d,  $J$  = 248.8 Hz), 162.0 (d,  $J$  = 248.8 Hz), 157.0, 148.7, 147.8, 136.0, 133.5, 133.0, 132.9, 131.5, 129.4 (d,  $J$  = 7.5 Hz), 128.8, 128.1 (d,  $J$  = 7.5 Hz), 127.5, 119.5, 114.9 (d,  $J$  = 21.3 Hz), 114.8 (d,  $J$  = 21.3 Hz).  $^{19}\text{F}$  NMR (470 MHz,  $\text{CDCl}_3$ ):  $\delta$  = –111.5, –112.3 ppm. HRMS (TOF  $\text{ES}^+$ )  $m/z$ :  $[\text{M}+\text{H}]^+$  calcd for  $\text{C}_{24}\text{H}_{15}\text{F}_2\text{NO}$  372.1194; found, 372.1201.

**(6-(4-Fluorophenyl)-4-phenylpyridin-3-yl)(phenyl)methanone (3v)**

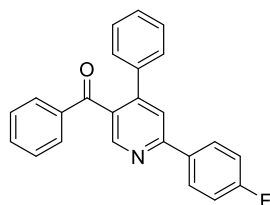

White solid (89%, 316 mg); Mp: 139.9–140.4 °C; IR (KBr): 3870, 2931, 1729, 1641, 1595, 1469, 779, 696, 541  $\text{cm}^{-1}$ ;  $^1\text{H}$  NMR (500 MHz,  $\text{DMSO}-d_6$ ):  $\delta$  = 8.75 (s, 1H, ArH), 8.36–8.33 (m, 2H, ArH), 8.12 (s, 1H, ArH), 7.66–7.65 (m, 2H, ArH), 7.56–7.53 (m, 1H, ArH), 7.42–7.28 (m, 9H, ArH).  $^{13}\text{C}$  NMR (125 MHz,  $\text{DMSO}-d_6$ ):  $\delta$  = 196.4, 163.8 (d,  $J$  = 246.7 Hz), 157.3, 149.4 (d,  $J$  = 11.3 Hz), 137.9, 137.1, 134.8, 134.8, 134.0, 132.9, 130.0, 129.9, 129.9, 129.2 (d,  $J$  = 10.0 Hz), 129.1, 129.0, 121.0, 116.2 (d,  $J$  = 22.5 Hz). HRMS (TOF  $\text{ES}^+$ )  $m/z$ :  $[\text{M}+\text{H}]^+$  calcd for  $\text{C}_{24}\text{H}_{16}\text{FNO}$  354.1289; found, 372.1202.

**(4-(4-Methoxyphenyl)-6-phenylpyridin-3-yl)(phenyl)methanone (3w)**

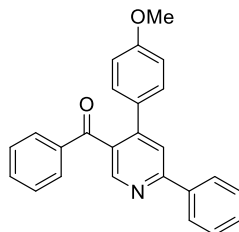

White solid (77%, 282 mg); Mp: 135.3–135.8 °C; IR (KBr): 3812, 3598, 1727, 1663, 1588, 1454, 1178, 612, 575  $\text{cm}^{-1}$ ;  $^1\text{H}$  NMR (500 MHz,  $\text{CDCl}_3$ ):  $\delta$  = 8.77 (s, 1H, ArH), 8.11–8.10 (m, 2H, ArH), 7.82 (s, 1H, ArH), 7.72–7.70 (m, 2H, ArH), 7.53–7.44 (m, 4H, ArH), 7.33–7.25 (m, 4H, ArH), 6.81–6.78 (m, 2H, ArH), 3.74 (s, 3H,  $\text{OCH}_3$ ).  $^{13}\text{C}$  NMR (125 MHz,  $\text{CDCl}_3$ ):  $\delta$  = 196.8, 160.1, 158.9, 149.6, 149.3, 138.6, 137.1, 133.3, 132.5, 130.3, 130.0, 129.9, 129.6, 128.9, 128.4, 127.2, 120.8, 114.2, 55.3. HRMS (TOF  $\text{ES}^+$ )  $m/z$ :  $[\text{M}+\text{H}]^+$  calcd for  $\text{C}_{25}\text{H}_{19}\text{NO}_2$  366.1489; found, 366.1496.

**(4-(4-Fluorophenyl)-6-(p-tolyl)pyridin-3-yl)(phenyl)methanone (3x)**

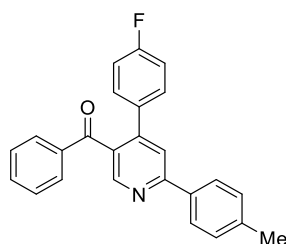

White solid (82%, 302 mg); Mp: 127.2–127.7 °C; IR (KBr): 3877, 1722, 1640, 1588, 1440, 688, 578  $\text{cm}^{-1}$ ;  $^1\text{H}$  NMR (500 MHz,  $\text{CDCl}_3$ ):  $\delta$  = 8.79 (s, 1H, ArH), 8.02–8.00 (m, 2H, ArH), 7.78 (s, 1H, ArH), 7.71–7.69 (m, 2H, ArH), 7.69–7.46 (m, 1H, ArH), 7.35–7.25 (m, 6H, ArH), 6.99–6.94 (m, 2H, ArH), 2.44 (s, 3H,  $\text{CH}_3$ ).  $^{13}\text{C}$  NMR (125 MHz,  $\text{CDCl}_3$ ):  $\delta$  = 196.4, 163.0 (d,  $J$  = 247.5 Hz), 159.1, 149.7, 148.7, 140.1, 137.1, 135.6, 134.2, 133.4, 132.2, 130.4 (d,  $J$  = 8.8 Hz), 129.8, 129.7, 128.4, 127.1, 120.5, 115.7 (d,  $J$  = 21.3 Hz), 21.4.  $^{19}\text{F}$  NMR (470 MHz,  $\text{CDCl}_3$ ):  $\delta$  = –112.6 ppm. HRMS (TOF  $\text{ES}^+$ )  $m/z$ :  $[\text{M}+\text{H}]^+$  calcd for  $\text{C}_{25}\text{H}_{18}\text{FNO}$  368.1445; found, 368.1451.

**(6-(4-Methoxyphenyl)-4-phenylpyridin-3-yl)(phenyl)methanone (3y)**

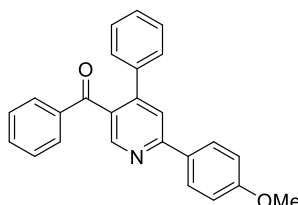

White solid (88%, 323 mg); Mp: 118.0–118.5 °C; IR (KBr): 3899, 1729, 1662, 1583, 1450, 1281, 672, 542  $\text{cm}^{-1}$ ;  $^1\text{H}$  NMR (500 MHz,  $\text{CDCl}_3$ ):  $\delta$  = 8.77 (s, 1H, ArH), 8.09–8.07 (m, 2H, ArH), 7.78 (s, 1H, ArH), 7.71–7.69 (m, 2H, ArH), 7.45–7.42 (m, 1H, ArH), 7.34–7.24 (m, 7H, ArH), 7.02–7.01 (m, 2H, ArH), 3.87 (s, 3H,  $\text{OCH}_3$ ).  $^{13}\text{C}$  NMR (125 MHz,  $\text{CDCl}_3$ ):  $\delta$  = 196.6, 161.2, 158.7, 149.8, 149.7, 138.2, 137.3, 133.2, 131.9, 131.0, 129.8, 129.8, 128.6, 128.6, 128.3, 128.3, 120.1, 114.3, 55.4. HRMS (TOF  $\text{ES}^+$ )  $m/z$ :  $[\text{M}+\text{H}]^+$  calcd for  $\text{C}_{25}\text{H}_{19}\text{NO}_2$  366.1489; found, 366.1498.

**(6-(4-Fluorophenyl)-4-phenylpyridin-3-yl)(p-tolyl)methanone (3z)**

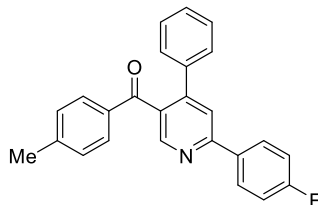

White solid (85%, 312 mg); Mp: 128.3–128.8 °C; IR (KBr): 3750, 1729, 1645, 1598, 1473, 1296, 839, 697, 568  $\text{cm}^{-1}$ ;  $^1\text{H}$  NMR (500 MHz,  $\text{CDCl}_3$ ):  $\delta$  = 8.68 (s, 1H, ArH), 8.04–8.01 (m, 2H, ArH), 7.72 (s, 1H, ArH), 7.56–7.54 (m, 2H, ArH), 7.28–7.26 (m, 2H, ArH), 7.22–7.18 (m, 3H, ArH), 7.14–7.10 (m, 2H, ArH), 7.06–7.04 (m, 2H, ArH).  $^{13}\text{C}$  NMR (125 MHz,  $\text{CDCl}_3$ ):  $\delta$  = 194.9, 162.9 (d,  $J$  = 248.8 Hz), 156.7, 148.7, 148.5, 143.4, 136.9, 133.7, 133.7, 133.6, 131.8, 129.0, 128.1, 128.1, 127.7, 127.5, 119.7, 114.9 (d,  $J$  = 21.3 Hz), 20.7.  $^{19}\text{F}$  NMR (470 MHz,  $\text{CDCl}_3$ ):  $\delta$  = –111.8 ppm. HRMS

(TOF ES<sup>+</sup>) m/z: [M+H]<sup>+</sup> calcd for C<sub>25</sub>H<sub>18</sub>FNO 368.1445; found, 368.1448.

**(4-(4-Nitrophenyl)-6-phenylpyridin-3-yl)(p-tolyl)methanone (3a')**

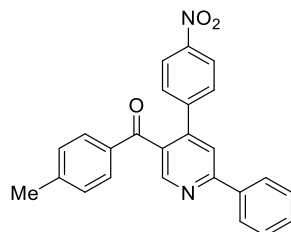

White solid (83%, 328 mg); Mp: 145.9–146.4 °C; IR (KBr): 3872, 1730, 1658, 1599, 1519, 1468, 1348, 1292, 695, 565 cm<sup>-1</sup>; <sup>1</sup>H NMR (500 MHz, CDCl<sub>3</sub>): δ = 8.84 (s, 1H, ArH), 8.18–8.16 (m, 2H, ArH), 8.12–8.10 (m, 2H, ArH), 7.83 (s, 1H, ArH), 7.67–7.66 (m, 2H, ArH), 7.55–7.47 (m, 5H, ArH), 7.26–7.19 (m, 2H, ArH), 2.39 (s, 3H, CH<sub>3</sub>). <sup>13</sup>C NMR (125 MHz, CDCl<sub>3</sub>): δ = 195.1, 159.3, 149.9, 147.8, 147.7, 145.1, 144.7, 138.0, 134.4, 132.4, 130.2, 130.1, 129.5, 129.5, 129.0, 127.3, 123.9, 120.8, 21.8. HRMS (TOF ES<sup>+</sup>) m/z: [M+H]<sup>+</sup> calcd for C<sub>25</sub>H<sub>18</sub>N<sub>2</sub>O<sub>3</sub> 395.1390; found, 395.1399.

**(4-(4-Fluorophenyl)-6-(p-tolyl)pyridin-3-yl)(p-tolyl)methanone (3b')**

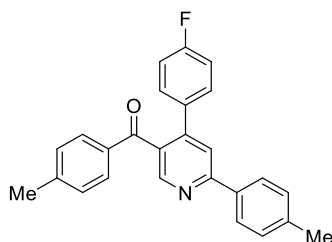

White solid (89%, 340 mg); Mp: 150.4–150.9 °C; IR (KBr): 3809, 1755, 1614, 1581, 1447, 1241, 631, 568 cm<sup>-1</sup>; <sup>1</sup>H NMR (500 MHz, CDCl<sub>3</sub>): δ = 8.75 (s, 1H, ArH), 8.01–8.00 (m, 2H, ArH), 7.77 (s, 1H, ArH), 7.63–7.62 (m, 2H, ArH), 7.34–7.31 (m, 4H, ArH), 7.15–7.14 (m, 2H, ArH), 7.00–6.96 (m, 2H, ArH), 2.44 (s, 3H, CH<sub>3</sub>), 2.36 (s, 3H, CH<sub>3</sub>). <sup>13</sup>C NMR (125 MHz, CDCl<sub>3</sub>): δ = 196.0, 163.0 (d, *J* = 247.5 Hz), 158.8, 149.5, 148.5, 144.5, 140.0, 135.6, 134.6, 134.2, 132.5, 130.4 (d, *J* = 8.8 Hz), 130.1, 129.7, 129.2, 127.1, 120.6, 115.7 (d, *J* = 22.5 Hz), 21.7, 21.3. <sup>19</sup>F NMR (470 MHz, CDCl<sub>3</sub>): δ = –112.7 ppm. HRMS (TOF ES<sup>+</sup>) m/z: [M+H]<sup>+</sup> calcd for C<sub>26</sub>H<sub>20</sub>FNO 382.1602; found, 382.1608.

**(4,6-Bis(4-fluorophenyl)pyridin-3-yl)(4-methoxyphenyl)methanone (3c')**

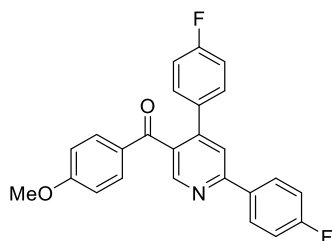

White solid (87%, 350 mg); Mp: 131.9–132.4 °C; IR (KBr): 3877, 1728, 1614, 1597, 1510, 1426, 1164, 691, 566 cm<sup>-1</sup>; <sup>1</sup>H NMR (500 MHz, CDCl<sub>3</sub>): δ = 8.74 (s, 1H, ArH), 8.11–8.08 (m, 2H, ArH), 7.75 (s, 1H, ArH), 7.70–7.69 (m, 2H, ArH), 7.35–7.32 (m, 2H,

ArH), 7.20–7.17 (m, 2H, ArH), 7.00–6.97 (m, 2H, ArH), 6.83–6.81 (m, 2H, ArH). <sup>13</sup>C NMR (125 MHz, CDCl<sub>3</sub>): δ = 194.7, 165.0, 164.0, 163.0 (d, *J* = 245.0 Hz), 157.7, 149.4, 148.4, 134.6, 134.0, 132.9, 132.3, 130.3 (d, *J* = 8.8 Hz), 130.0, 129.1 (d, *J* = 8.8 Hz), 120.5, 115.9 (d, *J* = 10.0 Hz), 115.8 (d, *J* = 10.0 Hz), 113.8, 55.5. <sup>19</sup>F NMR (470 MHz, CDCl<sub>3</sub>): δ = -111.6, -112.4 ppm. HRMS (TOF ES<sup>+</sup>) *m/z*: [M+H]<sup>+</sup> calcd for C<sub>25</sub>H<sub>17</sub>F<sub>2</sub>NO<sub>2</sub> 402.1300; found, 402.1306.

**(4-Methoxyphenyl)(6-(4-methoxyphenyl)-4-phenylpyridin-3-yl)methanone (3d')**

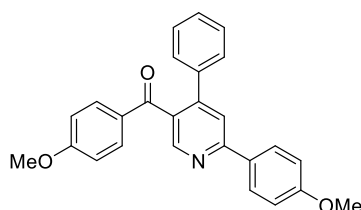

White solid (88%, 349 mg); Mp: 152.0–152.5 °C; IR (KBr): 3820, 1719, 1661, 1591, 1450, 848, 760, 516 cm<sup>-1</sup>; <sup>1</sup>H NMR (500 MHz, CDCl<sub>3</sub>): δ = 8.73 (s, 1H, ArH), 8.08–8.06 (m, 2H, ArH), 7.77 (s, 1H, ArH), 7.72–7.70 (m, 2H, ArH), 7.37–7.35 (m, 2H, ArH), 7.29–7.26 (m, 3H, ArH), 7.04–7.02 (m, 2H, ArH), 6.81–6.79 (m, 2H, ArH), 3.88 (s, 3H, OCH<sub>3</sub>), 3.81 (s, 3H, OCH<sub>3</sub>); <sup>13</sup>C NMR (125 MHz, CDCl<sub>3</sub>): δ = 195.0, 163.7, 161.1, 158.4, 149.5, 149.4, 138.2, 132.3, 131.1, 130.3, 128.6, 128.6, 128.6, 128.5, 120.2, 114.3, 114.3, 113.6, 55.5, 55.4; HRMS (TOF ES<sup>+</sup>) *m/z*: [M+H]<sup>+</sup> calcd for C<sub>26</sub>H<sub>21</sub>NO<sub>3</sub> 396.1594; found, 396.1601.

**(4-Chloro-3-methylphenyl)(6-(4-fluorophenyl)-4-phenylpyridin-3-yl)methanone (3e')**

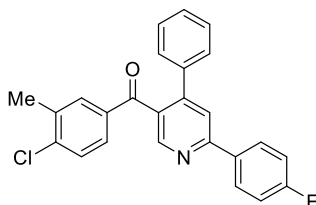

White solid (86%, 346 mg); Mp: 160.3–160.8 °C; IR (KBr): 3859, 1717, 1650, 1592, 1450, 772, 585 cm<sup>-1</sup>; <sup>1</sup>H NMR (400 MHz, CDCl<sub>3</sub>): δ = 8.77 (s, 1H, ArH), 8.13–8.08 (m, 2H, ArH), 7.79 (s, 1H, ArH), 7.58–7.43 (m, 1H, ArH), 7.38–7.36 (m, 1H, ArH), 7.33–7.20 (m, 6H, ArH), 7.19–7.11 (m, 2H, ArH); <sup>13</sup>C NMR (100 MHz, CDCl<sub>3</sub>): δ = 195.4, 165.3, 162.8, 158.0, 149.7 (d, *J* = 22.0 Hz), 140.0, 138.9 (d, *J* = 220.0 Hz), 136.4, 135.4, 134.6, 134.3, 132.1, 129.2, 1290 (d, *J* = 19.0 Hz), 128.8, 128.7 (d, *J* = 18.0 Hz), 128.5, 120.6, 115.9 (d, *J* = 22.0 Hz), 19.9; HRMS (TOF ES<sup>+</sup>) *m/z*: [M+H]<sup>+</sup> calcd for C<sub>25</sub>H<sub>17</sub>ClFNO 402.1055; found, 402.1058.

**(6-(2,6-dichloro-3-fluorophenyl)-4-(3,4-dichlorophenyl)pyridin-3-yl)(3,4-dimethylphenyl)methanone (3f')**

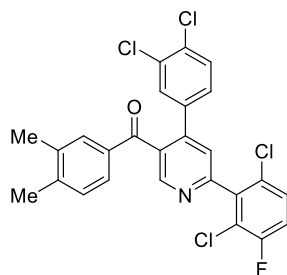

Yellow solid (84%, 434 mg); Mp: 149.4–149.9 °C; IR (KBr): 3636, 3459, 1739, 1673, 1596, 1531, 1444, 1328, 1247, 1127, 991, 825  $\text{cm}^{-1}$ ;  $^1\text{H}$  NMR (400 MHz,  $\text{CDCl}_3$ ):  $\delta$  = 8.71 (s, 1H, ArH), 7.68 (s, 1H, ArH), 7.62 (s, 2H, ArH), 7.35–7.34 (d, 1H, ArH), 7.29–7.27 (d, 1H, ArH), 7.12–7.09 (m, 2H, ArH), 7.03–7.01 (m, 1H, ArH), 6.86–6.85 (m, 1H, ArH), 2.33 (s, 6H,  $\text{CH}_3$ );  $^{13}\text{C}$  NMR (100 MHz,  $\text{CDCl}_3$ ):  $\delta$  = 193.3, 164.1 (d,  $J$  = 11.0 Hz), 161.6 (d,  $J$  = 12.0 Hz), 160.4, 149.9, 147.5, 140.0, 139.8, 138.7, 137.7, 133.5, 133.2, 132.0, 130.8, 130.7, 130.3, 127.8, 125.2, 120.9, 112.6 (d,  $J$  = 18.0 Hz), 112.6 (d,  $J$  = 19.0 Hz), 109.2, 108.9, 108.7, 21.4, 21.4. HRMS (TOF  $\text{ES}^+$ )  $m/z$ :  $[\text{M}+\text{H}]^+$  calcd for  $\text{C}_{26}\text{H}_{16}\text{Cl}_4\text{FNO}$  518.0043; found, 518.0045.

**(4-(3,4-dichlorophenyl)-6-(3,4-dimethylphenyl)pyridin-3-yl)(3,4-dimethylphenyl)methanone (3g')**

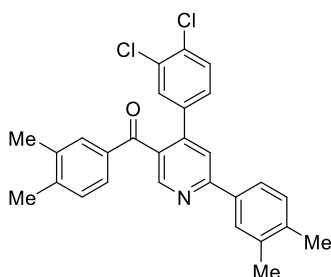

Yellow liquid (80%, 367 mg); IR (KBr): 3807, 3527, 3346, 3277, 3155, 2982, 1919, 1758, 1659, 1583, 1539, 1245, 907, 825  $\text{cm}^{-1}$ ;  $^1\text{H}$  NMR (400 MHz,  $\text{CDCl}_3$ ):  $\delta$  = 8.77 (s, 1H, ArH), 7.76 (s, 1H, ArH), 7.71 (s, 2H, ArH), 7.54 (s, 1H, ArH), 7.48–7.45 (m, 2H, ArH), 7.34–7.32 (d, 1H, ArH), 7.15–7.12 (m, 3H, ArH), 2.42 (s, 6H,  $\text{CH}_3$ ), 2.29 (s, 3H,  $\text{CH}_3$ ), 2.25 (s, 3H,  $\text{CH}_3$ );  $^{13}\text{C}$  NMR (100 MHz,  $\text{CDCl}_3$ ):  $\delta$  = 195.5, 159.4, 149.7, 147.3, 143.7, 138.6, 138.2, 138.2, 138.1, 137.2, 134.8, 133.0, 132.9, 132.9, 132.4, 131.7, 131.0, 130.5, 130.3, 129.9, 128.0, 127.9, 125.1, 120.9, 21.4, 21.4, 20.1, 19.7. HRMS (TOF  $\text{ES}^+$ )  $m/z$ :  $[\text{M}+\text{H}]^+$  calcd for  $\text{C}_{28}\text{H}_{23}\text{Cl}_2\text{NO}$  460.1229; found, 460.1232.

**1-(2-methyl-4,6-diphenylpyridin-3-yl)ethan-1-one (3h')**

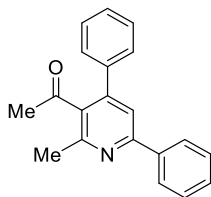

White solid (84%, 241 mg); Mp: 112.5–113.0 °C; IR (KBr): 3748, 3550, 1698, 1582, 1545, 1498, 1244, 762  $\text{cm}^{-1}$ ;  $^1\text{H}$  NMR (600 MHz,  $\text{CDCl}_3$ ):  $\delta$  = 7.97–7.95 (m, 2H, ArH), 7.49 (s, 1H, ArH), 7.41–7.37 (m, 5H, ArH), 7.36–7.33 (m, 3H, ArH), 2.55 (s, 3H,  $\text{CH}_3$ ),



1.93 (s, 3H, CH<sub>3</sub>CO). <sup>13</sup>C NMR (150 MHz, CDCl<sub>3</sub>): δ = 206.3, 157.0, 154.1, 147.3, 138.8, 138.4, 134.5, 129.3, 129.0, 128.8, 128.6, 128.5, 127.2, 118.6, 32.1, 23.1. HRMS (TOF ES<sup>+</sup>) m/z: [M+H]<sup>+</sup> calcd for C<sub>20</sub>H<sub>17</sub>NO 288.1383; found, 288.1383.

**methyl 2-methyl-4,6-diphenylnicotinate (3i')**

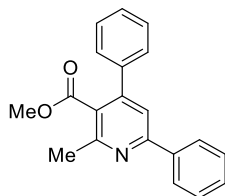

Yellow solid (82%, 249 mg); Mp: 97.3–97.8 °C; IR (KBr): 3762, 1738, 1584, 1546, 1441, 1273, 1079, 701, 670 cm<sup>-1</sup>; <sup>1</sup>H NMR (600 MHz, CDCl<sub>3</sub>): δ = 7.94–7.93 (m, 2H, ArH), 7.47 (s, 1H, ArH), 7.37–7.30 (m, 8H, ArH), 3.53 (s, 3H, CH<sub>3</sub>O), 2.61 (s, 3H, CH<sub>3</sub>). <sup>13</sup>C NMR (150 MHz, CDCl<sub>3</sub>): δ = 169.6, 157.5, 155.8, 149.0, 138.9, 138.8, 129.4, 128.8, 128.7, 128.6, 127.8, 127.3, 126.6, 118.5, 52.2, 23.2. HRMS (TOF ES<sup>+</sup>) m/z: [M+H]<sup>+</sup> calcd for C<sub>20</sub>H<sub>17</sub>NO<sub>2</sub> 304.1332; found, 304.1327.

**ethyl 2-methyl-4,6-diphenylnicotinate (3j')**

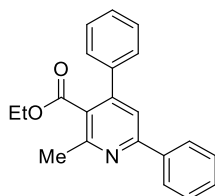

Yellow solid (79%, 251 mg); Mp: 110.1–110.6 °C; IR (KBr): 3915, 3492, 3277, 1766, 1638, 1529, 1464, 1245, 842, 716 cm<sup>-1</sup>; <sup>1</sup>H NMR (600 MHz, CDCl<sub>3</sub>): δ = 7.95–7.93 (m, 2H, ArH), 7.48 (s, 1H, ArH), 7.39–7.36 (m, 2H, ArH), 7.35–7.31 (m, 6H, ArH), 4.05–4.01 (m, 2H, CH<sub>2</sub>), 2.64 (s, 3H, CH<sub>3</sub>Ar), 0.92–0.90 (m, 3H, CH<sub>3</sub>). <sup>13</sup>C NMR (150 MHz, CDCl<sub>3</sub>): δ = 169.0, 157.4, 155.8, 149.0, 139.0, 138.8, 129.4, 128.8, 128.6, 128.5, 128.0, 127.2, 126.8, 118.6, 61.4, 23.2, 13.7. HRMS (TOF ES<sup>+</sup>) m/z: [M+H]<sup>+</sup> calcd for C<sub>21</sub>H<sub>19</sub>NO<sub>2</sub> 318.1489; found, 318.1493.

**isopropyl 2-methyl-4,6-diphenylnicotinate (3k')**

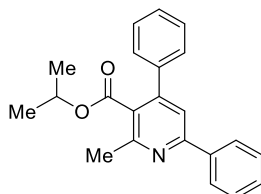

Yellow liquid (77%, 255 mg); IR (KBr): 3896, 3686, 3562, 3227, 1722, 1584, 1547, 1458, 1381, 1244, 1098, 832, 698 cm<sup>-1</sup>; <sup>1</sup>H NMR (600 MHz, CDCl<sub>3</sub>): δ = 7.92–7.91 (m, 2H, ArH), 7.44 (s, 1H, ArH), 7.36–7.29 (m, 8H, ArH), 4.94–4.92 (m, 1H, CH), 2.62 (s, 3H, CH<sub>3</sub>Ar), 0.94 (s, 3H, CH<sub>3</sub>), 0.92 (s, 3H, CH<sub>3</sub>). <sup>13</sup>C NMR (150 MHz, CDCl<sub>3</sub>): δ = 168.4, 157.3, 155.5, 148.9, 138.9, 138.9, 129.3, 128.8, 128.6, 128.5, 128.5, 128.1, 127.3, 118.6, 69.1, 23.1, 21.4, 21.4. HRMS (TOF ES<sup>+</sup>) m/z: [M+H]<sup>+</sup> calcd for C<sub>22</sub>H<sub>21</sub>NO<sub>2</sub> 332.1645; found, 332.1642.

### 2-methyl-4,6-diphenylnicotinonitrile (3l')

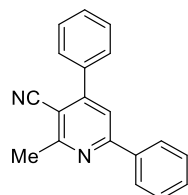

White solid (89%, 240 mg); Mp: 126.0–126.5 °C; IR (KBr): 3935, 3808, 3620, 3040, 2224, 1764, 1592, 1546, 1504, 1382, 1246, 1164, 1000, 878, 792, 696  $\text{cm}^{-1}$ ;  $^1\text{H}$  NMR (600 MHz,  $\text{CDCl}_3$ ):  $\delta$  = 8.01–7.99 (m, 2H, ArH), 7.60 (s, 1H, ArH), 7.57–7.55 (m, 2H, ArH), 7.47–7.40 (m, 6H, ArH), 2.84 (s, 3H,  $\text{CH}_3$ ).  $^{13}\text{C}$  NMR (150 MHz,  $\text{CDCl}_3$ ):  $\delta$  = 162.8, 159.2, 153.9, 137.8, 136.6, 130.4, 129.9, 129.0, 129.0, 128.5, 127.5, 118.0, 117.3, 105.9, 24.4. HRMS (TOF  $\text{ES}^+$ )  $m/z$ :  $[\text{M}+\text{H}]^+$  calcd for  $\text{C}_{19}\text{H}_{14}\text{N}_2$  271.1230; found, 271.1229.

### 2-(methylthio)-3-nitro-4,6-diphenylpyridine (3m')

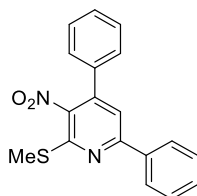

Yellow solid (77%, 248 mg); Mp: 137.4–137.9 °C; IR (KBr): 3825, 3745, 3333, 3069, 1771, 1580, 1435, 1243, 880, 697, 589  $\text{cm}^{-1}$ ;  $^1\text{H}$  NMR (600 MHz,  $\text{CDCl}_3$ ):  $\delta$  = 8.03–8.01 (m, 2H, ArH), 7.41–7.27 (m, 6H, ArH), 7.26–7.25 (m, 2H, ArH), 6.94 (s, 1H, ArH), 3.17 (s, 3H,  $\text{CH}_3$ ).  $^{13}\text{C}$  NMR (150 MHz,  $\text{CDCl}_3$ ):  $\delta$  = 159.0, 152.5, 149.1, 138.3, 137.7, 130.5, 128.8, 128.7, 128.5, 127.9, 127.6, 127.0, 111.8, 28.6. HRMS (TOF  $\text{ES}^+$ )  $m/z$ :  $[\text{M}+\text{H}]^+$  calcd for  $\text{C}_{18}\text{H}_{14}\text{N}_2\text{O}_2\text{S}$  323.0849; found, 323.0850.

### 2,4-diphenyl-7,8-dihydroquinolin-5(6H)-one (3n')

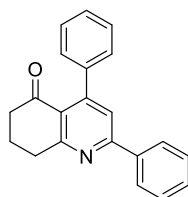

Yellow solid (87%, 260 mg); Mp: 120.0–120.5 °C; IR (KBr): 3878, 3565, 3066, 2952, 1739, 1696, 1580, 1532, 1498, 1441, 1368, 1241, 764, 696  $\text{cm}^{-1}$ ;  $^1\text{H}$  NMR (600 MHz,  $\text{CDCl}_3$ ):  $\delta$  = 7.99–7.98 (m, 2H, ArH), 7.44 (s, 1H, ArH), 7.41–7.37 (m, 3H, ArH), 7.36–7.32 (m, 3H, ArH), 7.21–7.19 (m, 2H, ArH), 3.22–3.20 (m, 2H,  $\text{CH}_2\text{Ar}$ ), 2.61–2.59 (m, 2H,  $\text{CH}_2\text{CO}$ ), 2.16–2.12 (m, 2H,  $\text{CH}_2$ ).  $^{13}\text{C}$  NMR (150 MHz,  $\text{CDCl}_3$ ):  $\delta$  = 197.7, 164.9, 159.0, 152.7, 140.6, 138.1, 130.1, 128.9, 128.1, 127.8, 127.8, 127.5, 124.9, 122.0, 40.1, 34.0, 21.7. HRMS (TOF  $\text{ES}^+$ )  $m/z$ :  $[\text{M}+\text{H}]^+$  calcd for  $\text{C}_{21}\text{H}_{17}\text{NO}$  300.1383; found, 300.1386.

### 7,7-dimethyl-2,4-diphenyl-7,8-dihydroquinolin-5(6H)-one (3o')

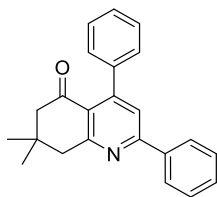

White solid (83%, 271 mg); Mp: 135.1–135.6 °C; IR (KBr): 3854, 3464, 2960, 1692, 1581, 1542, 1451, 1372, 1280, 1239, 888,  $\text{cm}^{-1}$ ;  $^1\text{H}$  NMR (600 MHz,  $\text{CDCl}_3$ ):  $\delta$  = 8.00–7.99 (m, 2H, ArH), 7.44 (s, 1H, ArH), 7.40–7.38 (m, 3H, ArH), 7.35–7.33 (m, 3H, ArH), 7.21–7.20 (m, 2H, ArH), 3.13 (s, 2H,  $\text{CH}_2\text{Ar}$ ), 2.47 (s, 2H,  $\text{CH}_2\text{CO}$ ), 1.08 (s, 6H,  $\text{CH}_3$ ).  $^{13}\text{C}$  NMR (150 MHz,  $\text{CDCl}_3$ ):  $\delta$  = 197.8, 163.5, 159.4, 152.3, 140.5, 138.2, 130.0, 128.9, 128.0, 127.8, 127.8, 127.5, 123.9, 121.8, 53.8, 47.8, 32.7, 28.3, 28.3. HRMS (TOF  $\text{ES}^+$ )  $m/z$ :  $[\text{M}+\text{H}]^+$  calcd for  $\text{C}_{23}\text{H}_{21}\text{NO}$  328.1696; found, 328.1698.

### 2,4-diphenyl-5,6,7,8-tetrahydroquinoline (3p')

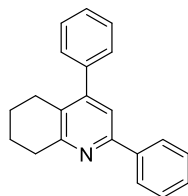

White solid (83%, 237 mg); Mp: 117.3–117.8 °C; IR (KBr): 3805, 3631, 2937, 2863, 1587, 1546, 1442, 1381, 1244, 768, 698  $\text{cm}^{-1}$ ;  $^1\text{H}$  NMR (600 MHz,  $\text{CDCl}_3$ ):  $\delta$  = 7.89–7.88 (m, 2H, ArH), 7.36–7.23 (m, 9H, ArH), 3.02–3.00 (m, 2H,  $\text{CH}_2$ ), 2.57–2.55 (m, 2H,  $\text{CH}_2$ ), 1.86–1.82 (m, 2H,  $\text{CH}_2$ ), 1.68–1.64 (m, 2H,  $\text{CH}_2$ ).  $^{13}\text{C}$  NMR (150 MHz,  $\text{CDCl}_3$ ):  $\delta$  = 157.6, 154.3, 150.4, 139.7, 139.7, 128.7, 128.6, 128.6, 128.5, 128.4, 127.8, 127.0, 119.2, 33.3, 27.3, 23.1, 23.1. HRMS (TOF  $\text{ES}^+$ )  $m/z$ :  $[\text{M}+\text{H}]^+$  calcd for  $\text{C}_{21}\text{H}_{19}\text{N}$  286.1590; found, 286.1588.

### The proposed mechanism of the cascade reaction

The proposed mechanism is shown in Scheme 2. Initially,  $\alpha,\beta$ -unsaturated ketoxime acetate **1e** was formed **4e** via SET mechanism. Subsequently, the radical intermediate **4e** acquired one electron from the  $\text{Fe}^{2+}$  to form the intermediate **5e**. Then, the intermediate **5e** undergoes a bis-Michael reaction with the substrate **2f**, yielding the key intermediate **6f**. The intermediate was further oxidized by  $\text{Fe}^{3+}$  and formed the intermediate **7f** after losing two electrons. The intermediate **7f** produced the intermediate **8f** after losing one proton. Finally, the intermediate **8f** lost one molecule of  $\text{PhNH}_2$  to yield the final product **3f**.

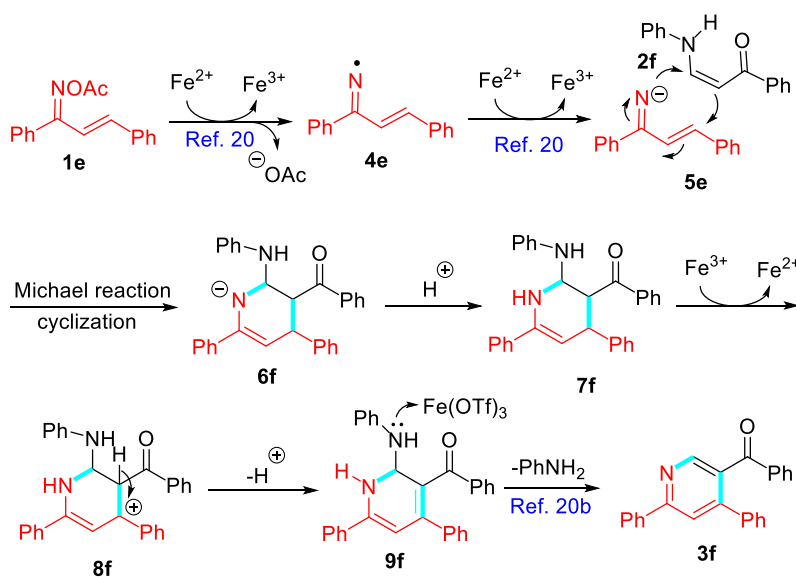

**Scheme S1.** The mechanism were tested by HPLC-HRMS

Furthermore, we tried to make the mixture of **1e** (0.1 mmol), **2f** (0.11 mmol) and  $\text{Fe}(\text{OTf})_3$  (0.05 equiv.) in toluene and carried out refluxing for 0.5 h. Following this, we immediately injected the reaction mixture into the high-pressure liquid chromatography-high-resolution mass spectrometry (HPLC-HRMS) system. Some intermediate molecular ion peaks appeared (ESI, Figures S101–S108). The molecular ion peaks that appeared in the high-resolution mass spectrum were: HRMS (TOF  $\text{ES}^+$ ):  $m/z$  calcd. for  $\text{C}_{17}\text{H}_{15}\text{NNaO}_2$  [ $\text{M}+\text{Na}$ ] $^+$ , 288.0995; found, 288.0996, which is the HRMS spectrum of **1e** (SI, Figure S102); HRMS (TOF  $\text{ES}^+$ ):  $m/z$  calcd. for  $\text{C}_2\text{H}_5\text{O}_2$  [ $\text{M}+\text{H}$ ] $^+$ , 61.0284; found, 61.0281, which is the HRMS spectrum of HOAc (SI, Figure S103). HRMS (TOF  $\text{ES}^+$ ):  $m/z$  calcd. for  $\text{C}_{15}\text{H}_{14}\text{NO}$  [ $\text{M}+\text{H}$ ] $^+$ , 224.1070; found, 224.1070, which is the HRMS spectrum of **2f** (SI, Figure S104); HRMS (TOF  $\text{ES}^+$ ):  $m/z$  calcd. for  $\text{C}_{15}\text{H}_{12}\text{N}^+$  [ $\text{M}$ ] $^+$ , 206.0964; found, 206.0965, which is the HRMS spectrum of **4e** (SI, Figure S105); HRMS (TOF  $\text{ES}^+$ ):  $m/z$  calcd. for  $\text{C}_{15}\text{H}_{14}\text{N}^+$  [ $\text{M}+\text{H}$ ] $^+$ , 208.1121; found, 208.1117, which is the HRMS spectrum of **5e** (SI, Figure S106); HRMS (TOF  $\text{ES}^+$ ):  $m/z$  calcd. for  $\text{C}_{30}\text{H}_{27}\text{N}_2\text{O}$  [ $\text{M}+\text{H}$ ] $^+$ , 431.2118; found, 431.2115, which is the HRMS spectrum of **7f** (SI, Figure S107); HRMS (TOF  $\text{ES}^+$ ):  $m/z$  calcd. for  $\text{C}_{30}\text{H}_{25}\text{N}_2\text{O}$  [ $\text{M}+\text{H}$ ] $^+$ , 429.1961; found, 429.1957, which is the HRMS spectra of intermediates **8f** or **9f** (SI, Figures S108); HRMS (TOF  $\text{ES}^+$ ):  $m/z$  calcd. for  $\text{C}_{24}\text{H}_{18}\text{NO}$  [ $\text{M}+\text{H}$ ] $^+$ , 336.1383; found, 336.1380, which is the HRMS spectrum of target compound **3f** (SI, Figure S109). Based on the molecular ion peaks of intermediates **4e–5e** and **7f–9f** (ESI, Figures

S105–S108). We believe there exist ample evidence in support of the proposed mechanism.

### X-ray Structure and Data of 3u<sup>3</sup>

**Single crystal culture and confirmation:** First, compound **3u** (20 mg) was added to a bottle and dissolved by the addition of ethyl acetate (0.5 mL). Then, the bottle was placed in a dry, ventilated place at room temperature for 10 days. Some crystals appeared, and for single crystal parsing, crystals were selected with sizes of 0.34 mm x 0.24 mm x 0.18 mm. The Bruker D8 VENTURE was used to obtain single crystal diffraction at 100.0 K with the use of three-circle diffractometer MoK ( $\lambda = 0.71073 \text{ \AA}$ ) for diffraction intensity data collection, using  $\Phi$  and omega scanning. The crystal structure was solved by the atomic method using the SHELXL 2018/3 (Sheldrick, 2015) program (Supporting Information, Figure S1, CCDC 2260760).<sup>3</sup>

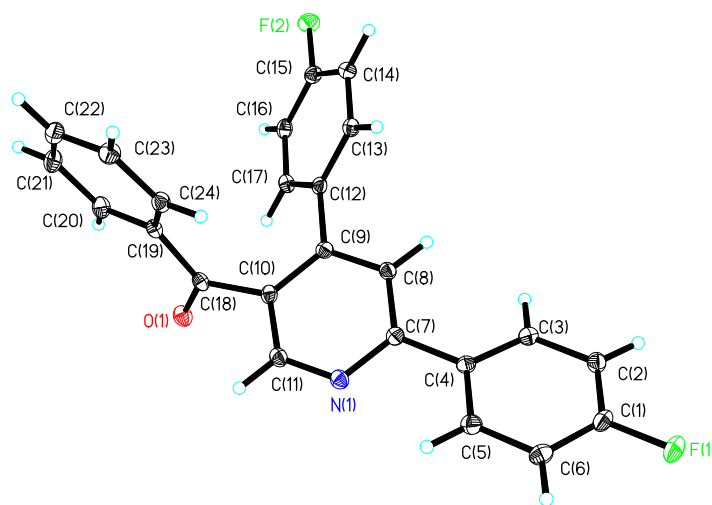

**Figure S1.** X-Ray crystal structure of **3u**, ellipsoid is drawn at the 30% probability level.

**Table S1.** Crystal data and structure refinement for **3u**

|                                   |                                                                                                                                     |
|-----------------------------------|-------------------------------------------------------------------------------------------------------------------------------------|
| Identification code               | 1                                                                                                                                   |
| Empirical formula                 | C <sub>24</sub> H <sub>15</sub> F <sub>2</sub> NO                                                                                   |
| Formula weight                    | 371.37                                                                                                                              |
| Temperature                       | 100.00 K                                                                                                                            |
| Wavelength                        | 0.71073 Å                                                                                                                           |
| Crystal system, space group       | Triclinic, P-1                                                                                                                      |
| Unit cell dimensions              | a = 8.7520(7) Å    alpha = 88.991(3) deg.<br>b = 9.0608(6) Å    beta = 76.810(3) deg.<br>c = 11.3766(9) Å    gamma = 82.972(3) deg. |
| Volume                            | 871.72(11) Å <sup>3</sup>                                                                                                           |
| Z, Calculated density             | 2, 1.415 Mg/m <sup>3</sup>                                                                                                          |
| Absorption coefficient            | 0.101 mm <sup>-1</sup>                                                                                                              |
| F(000)                            | 384                                                                                                                                 |
| Crystal size                      | 0.34 x 0.24 x 0.18 mm                                                                                                               |
| Theta range for data collection   | 2.265 to 28.446 deg.                                                                                                                |
| Limiting indices                  | -11<=h<=11, -12<=k<=11, -15<=l<=15                                                                                                  |
| Reflections collected / unique    | 19045 / 4364 [R(int) = 0.0457]                                                                                                      |
| Completeness to theta = 25.242    | 99.7 %                                                                                                                              |
| Absorption correction             | Semi-empirical from equivalents                                                                                                     |
| Max. and min. transmission        | 0.7457 and 0.7046                                                                                                                   |
| Refinement method                 | Full-matrix least-squares on F <sup>2</sup>                                                                                         |
| Data / restraints / parameters    | 4364 / 0 / 253                                                                                                                      |
| Goodness-of-fit on F <sup>2</sup> | 1.031                                                                                                                               |
| Final R indices [I>2sigma(I)]     | R1 = 0.0450, wR2 = 0.0956                                                                                                           |
| Rindices (all data)               | R1 = 0.0671, wR2 = 0.1068                                                                                                           |
| Extinction coefficient            | n/a                                                                                                                                 |
| Largest diff. peak and hole       | 0.269 and -0.213 e.Å <sup>-3</sup>                                                                                                  |

**Table S2.** Bond Lengths for **3u**

| <b>Atom</b> | <b>Atom</b> | <b>Length/Å</b> | <b>Atom</b> | <b>Atom</b> | <b>Length/Å</b> |
|-------------|-------------|-----------------|-------------|-------------|-----------------|
| F(1)        | C(1)        | 1.3622(16)      | C(11)       | H(11)       | 0.9500          |
| F(2)        | C(15)       | 1.3576(16)      | C(12)       | C(13)       | 1.398(2)        |
| O(1)        | C(18)       | 1.2209(17)      | C(12)       | C(17)       | 1.396(2)        |
| N(1)        | C(7)        | 1.3456(18)      | C(13)       | H(13)       | 0.9500          |
| N(1)        | C(11)       | 1.3318(19)      | C(13)       | C(14)       | 1.387(2)        |
| C(1)        | C(2)        | 1.376(2)        | C(14)       | H(14)       | 0.9500          |
| C(1)        | C(6)        | 1.374(2)        | C(14)       | C(15)       | 1.377(2)        |
| C(2)        | H(2)        | 0.9500          | C(15)       | C(16)       | 1.374(2)        |
| C(2)        | C(3)        | 1.389(2)        | C(16)       | H(16)       | 0.9500          |
| C(3)        | H(3)        | 0.9500          | C(16)       | C(17)       | 1.386(2)        |
| C(3)        | C(4)        | 1.395(2)        | C(17)       | H(17)       | 0.9500          |
| C(4)        | C(5)        | 1.397(2)        | C(18)       | C(19)       | 1.491(2)        |
| C(4)        | C(7)        | 1.4863(19)      | C(19)       | C(20)       | 1.398(2)        |
| C(5)        | H(5)        | 0.9500          | C(19)       | C(24)       | 1.394(2)        |
| C(5)        | C(6)        | 1.383(2)        | C(20)       | H(20)       | 0.9500          |
| C(6)        | H(6)        | 0.9500          | C(20)       | C(21)       | 1.384(2)        |
| C(7)        | C(8)        | 1.3958(19)      | C(21)       | H(21)       | 0.9500          |
| C(8)        | H(8)        | 0.9500          | C(21)       | C(22)       | 1.390(2)        |
| C(8)        | C(9)        | 1.3916(19)      | C(22)       | H(22)       | 0.9500          |
| C(9)        | C(10)       | 1.4008(19)      | C(22)       | C(23)       | 1.387(2)        |
| C(9)        | C(12)       | 1.4861(19)      | C(23)       | H(23)       | 0.9500          |
| C(10)       | C(11)       | 1.393(2)        | C(23)       | C(24)       | 1.388(2)        |
| C(10)       | C(18)       | 1.503(2)        | C(24)       | H(24)       | 0.9500          |

**Table S3. Bond Angles for 3u**

| Atom  | Atom  | Atom  | Angle/°    | Atom  | Atom   | Atom  | Angle/°    |
|-------|-------|-------|------------|-------|--------|-------|------------|
| C(11) | N(1)  | C(7)  | 117.44(12) | C(14) | C(13)  | C(12) | 121.03(13) |
| F(1)  | C(1)  | C(2)  | 118.52(14) | C(14) | C(13)  | H(13) | 119.5      |
| F(1)  | C(1)  | C(6)  | 118.43(13) | C(13) | C(14)  | H(14) | 120.9      |
| C(6)  | C(1)  | C(2)  | 123.04(14) | C(15) | C(14)  | C(13) | 118.24(14) |
| C(1)  | C(2)  | H(2)  | 120.9      | C(15) | C(14)  | H(14) | 120.9      |
| C(1)  | C(2)  | C(3)  | 118.17(14) | F(2)  | C(15)  | C(14) | 118.73(13) |
| C(3)  | C(2)  | H(2)  | 120.9      | F(2)  | C(15)  | C(16) | 118.43(13) |
| C(2)  | C(3)  | H(3)  | 119.6      | C(16) | C(15)  | C(14) | 122.83(13) |
| C(2)  | C(3)  | C(4)  | 120.82(13) | C(15) | C(16)  | H(16) | 120.9      |
| C(4)  | C(3)  | H(3)  | 119.6      | C(15) | C(16)  | C(17) | 118.30(13) |
| C(3)  | C(4)  | C(5)  | 118.63(13) | C(17) | C(16)  | H(16) | 120.9      |
| C(3)  | C(4)  | C(7)  | 121.63(12) | C(12) | C(17)  | H(17) | 119.4      |
| C(5)  | C(4)  | C(7)  | 119.74(13) | C(16) | C(17)  | C(12) | 121.12(14) |
| C(4)  | C(5)  | H(5)  | 119.4      | C(16) | C(17)  | H(17) | 119.4      |
| C(6)  | C(5)  | C(4)  | 121.17(14) | O(1)  | C(18)  | C(10) | 119.46(13) |
| C(6)  | C(5)  | H(5)  | 119.4      | O(1)  | C(18)  | C(19) | 120.89(13) |
| C(1)  | C(6)  | C(5)  | 118.12(13) | C(19) | C(18)  | C(10) | 119.50(12) |
| C(1)  | C(6)  | H(6)  | 120.9      | C(20) | C(19)  | C(18) | 118.65(13) |
| C(5)  | C(6)  | H(6)  | 120.9      | C(24) | C(19)- | C(18) | 121.42(13) |
| N(1)  | C(7)  | C(4)  | 115.80(12) | C(24) | C(19)  | C(20) | 119.78(13) |
| N(1)  | C(7)  | C(8)  | 121.76(13) | C(19) | C(20)  | H(20) | 120.0      |
| C(8)  | C(7)  | C(4)  | 122.44(13) | C(21) | C(20)  | C(19) | 119.95(14) |
| C(7)  | C(8)  | H(8)  | 119.7      | C(21) | C(20)  | H(20) | 120.0      |
| C(9)  | C(8)  | C(7)  | 120.65(13) | C(20) | C(21)  | H(21) | 120.0      |
| C(9)  | C(8)  | H(8)  | 119.7      | C(20) | C(21)  | C(22) | 120.08(14) |
| C(8)  | C(9)  | C(10) | 117.28(13) | C(22) | C(21)  | H(21) | 120.0      |
| C(8)  | C(9)  | C(12) | 120.07(12) | C(21) | C(22)  | H(22) | 119.9      |
| C(10) | C(9)  | C(12) | 122.61(13) | C(23) | C(22)  | C(21) | 120.18(14) |
| C(9)  | C(10) | C(18) | 125.17(13) | C(23) | C(22)  | H(22) | 119.9      |
| C(11) | C(10) | C(9)  | 118.09(13) | C(22) | C(23)  | H(23) | 120.0      |
| C(11) | C(10) | C(18) | 116.75(12) | C(22) | C(23)  | C(24) | 120.06(14) |
| N(1)  | C(11) | C(10) | 124.69(13) | C(24) | C(23)  | H(23) | 120.0      |
| N(1)  | C(11) | H(11) | 117.7      | C(19) | C(24)  | H(24) | 120.0      |
| C(10) | C(11) | H(11) | 117.7      | C(23) | C(24)  | C(19) | 119.93(14) |
| C(13) | C(12) | C(9)  | 120.57(13) | C(23) | C(24)  | H(24) | 120.0      |
| C(17) | C(12) | C(9)  | 120.95(13) | C(14) | C(13)  | C(12) | 121.03(13) |
| C(17) | C(12) | C(13) | 118.45(13) | C(14) | C(13)  | H(13) | 119.5      |
| C(12) | C(13) | H(13) | 119.5      |       |        |       |            |



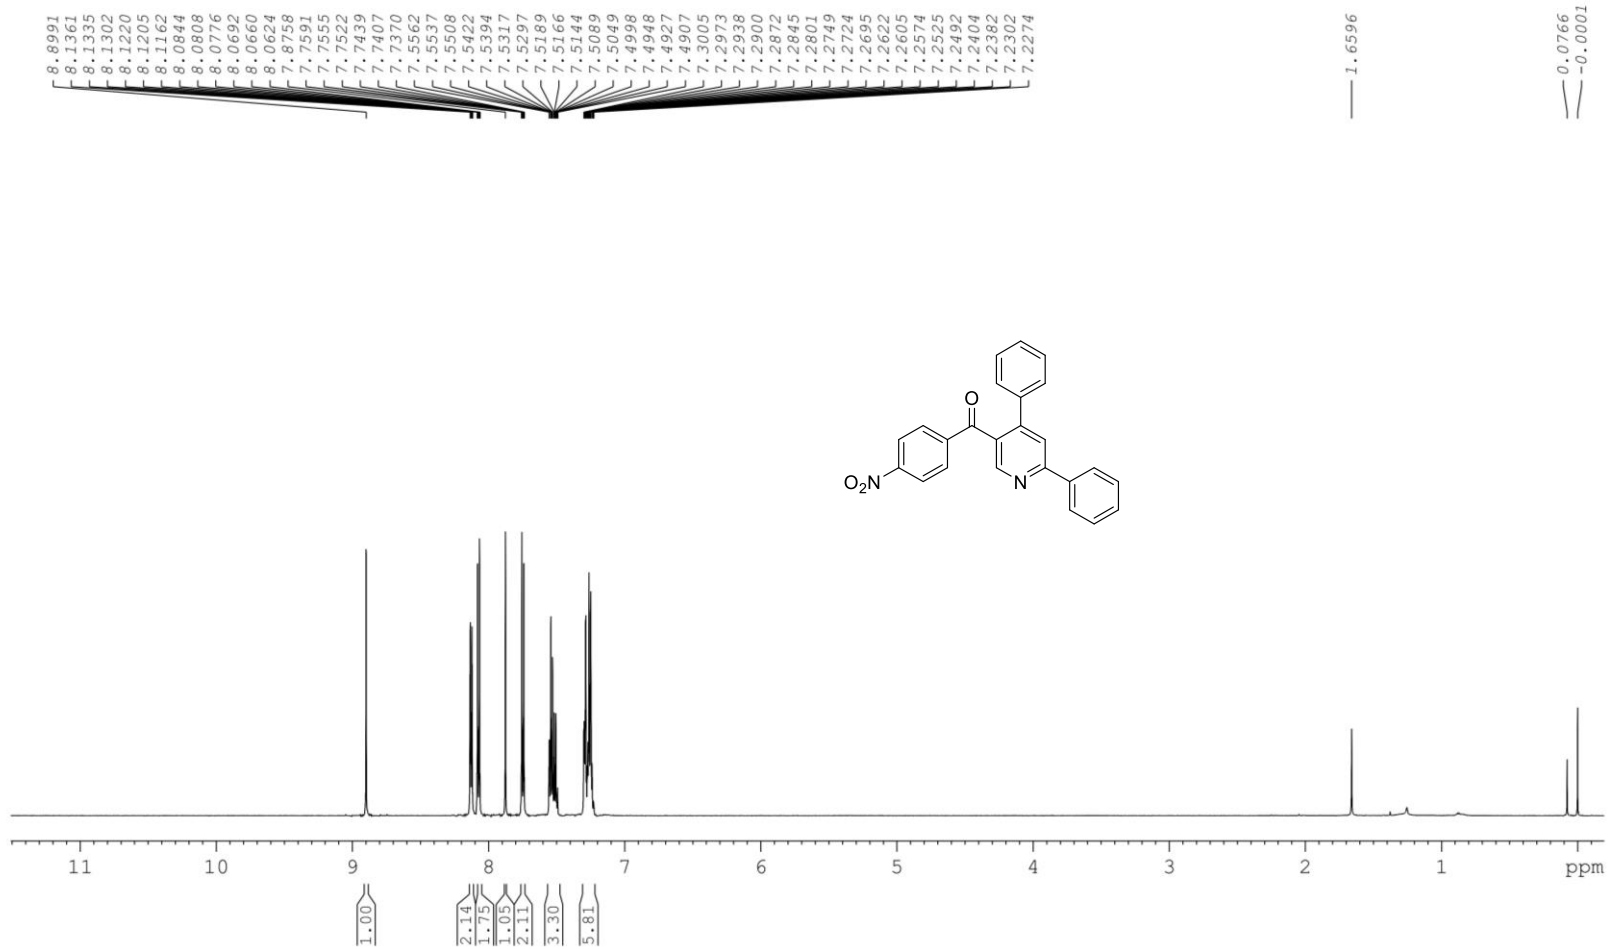

**Figure S2.** <sup>1</sup>H NMR (600 MHz, CDCl<sub>3</sub>) spectra of compound **3a**

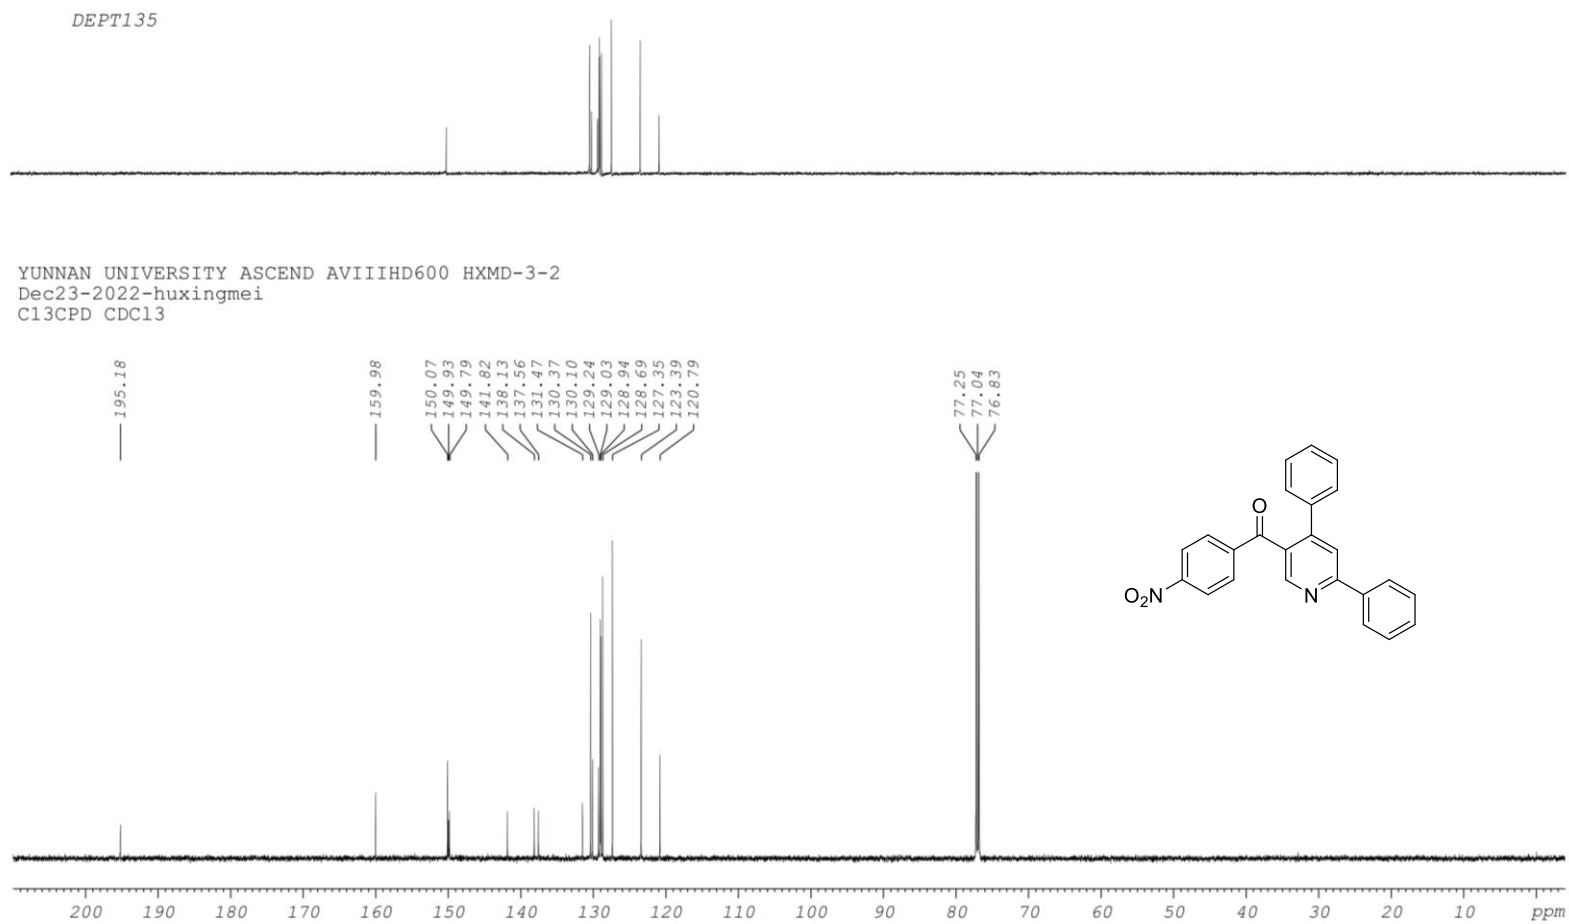

**Figure S3.**  $^{13}\text{C}$  NMR (150 MHz,  $\text{CDCl}_3$ ) spectra of compound **3a**

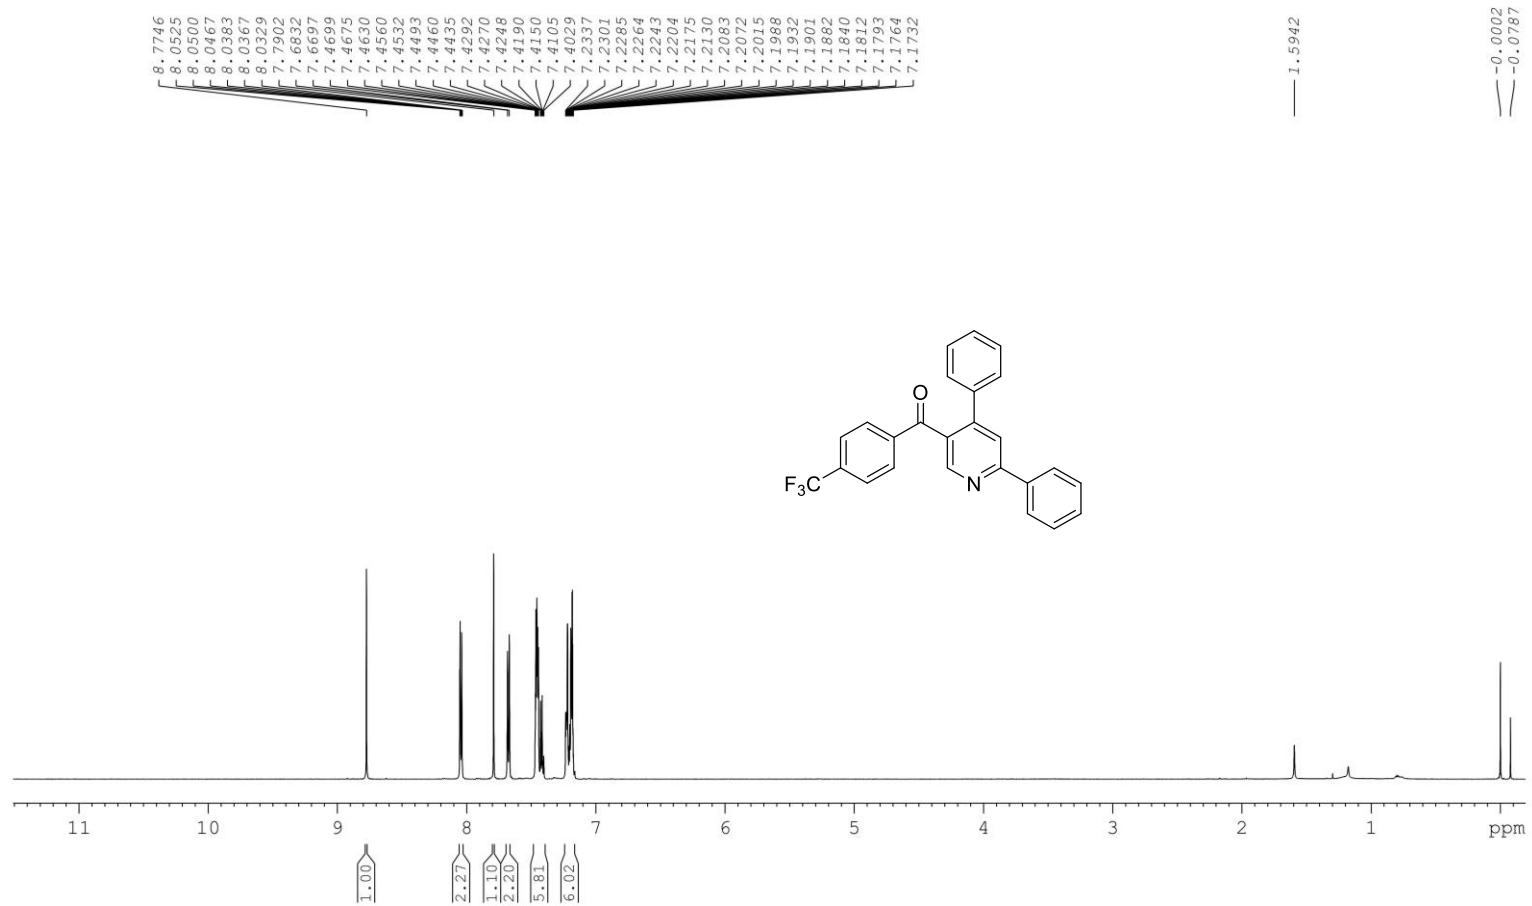

**Figure S4.** <sup>1</sup>H NMR (600 MHz, CDCl<sub>3</sub>) spectra of compound **3b**

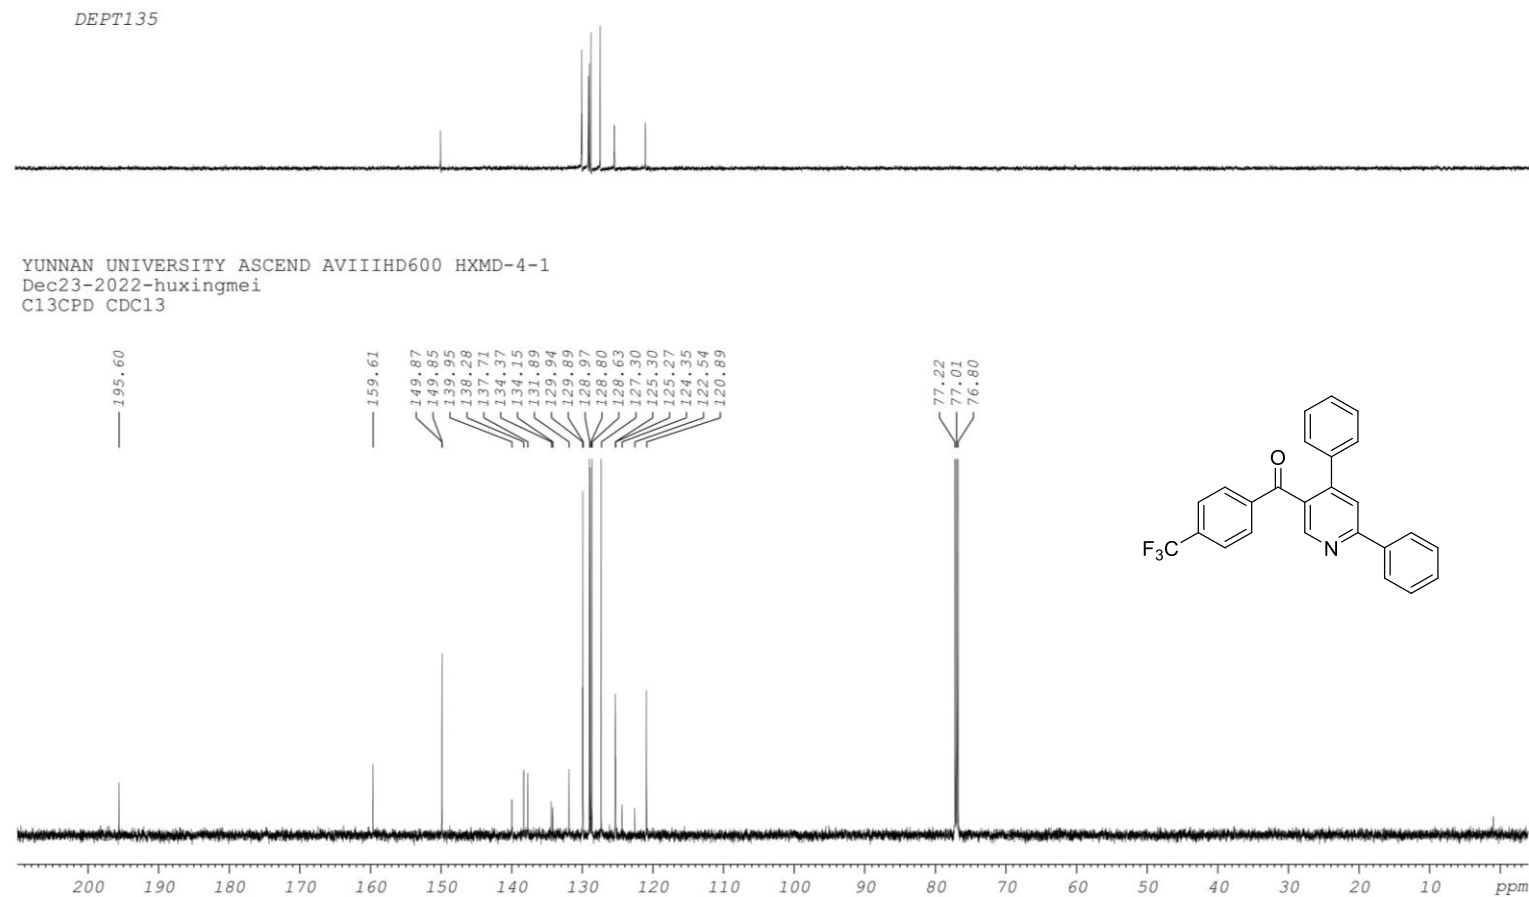

Figure S5. <sup>13</sup>C NMR (150 MHz, CDCl<sub>3</sub>) spectra of compound **3b**

YUNNAN UNIVERSITY ASCEND AVIIIHD600 HXMD-4-1  
Dec23-2022-huxingmei  
F19CPD CDC13

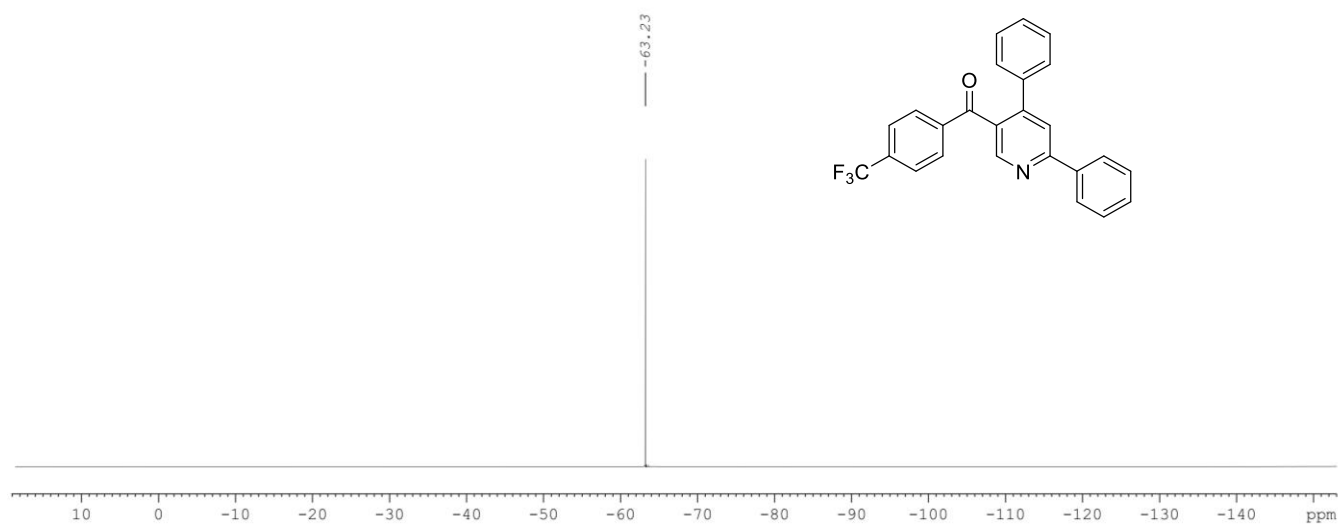

**Figure S6.**  $^{19}\text{F}$  NMR (564 MHz,  $\text{CDCl}_3$ ) spectra of compound **3b**

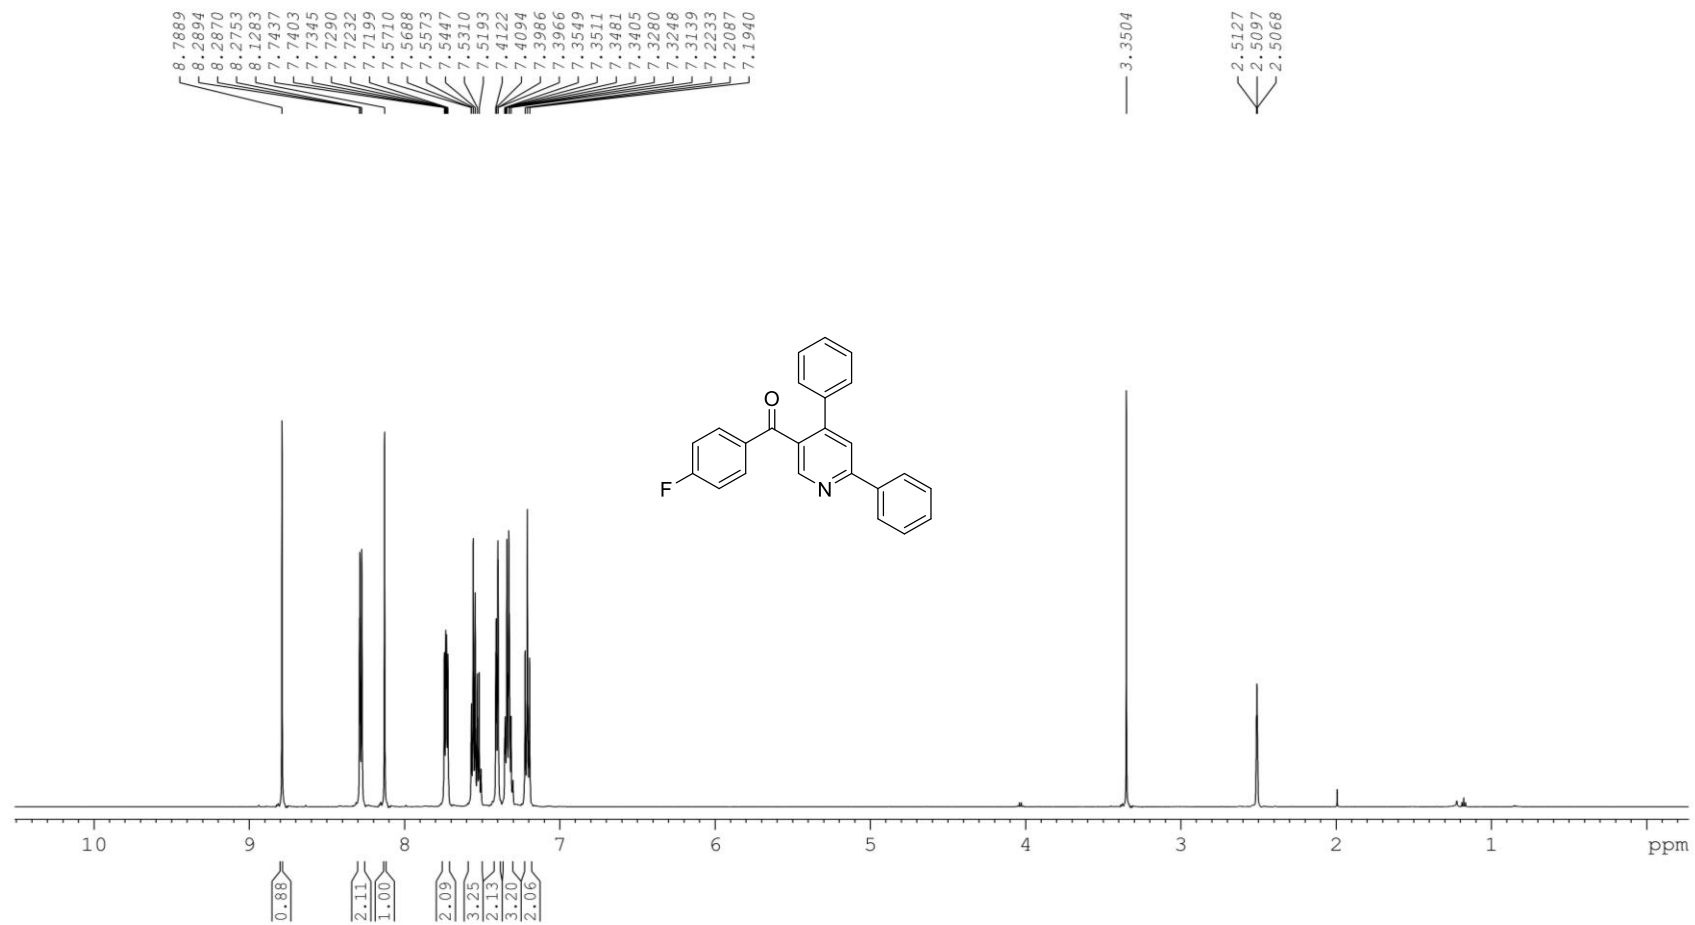

**Figure S7.** <sup>1</sup>H NMR (600 MHz, DMSO-*d*<sub>6</sub>) spectra of compound 3c

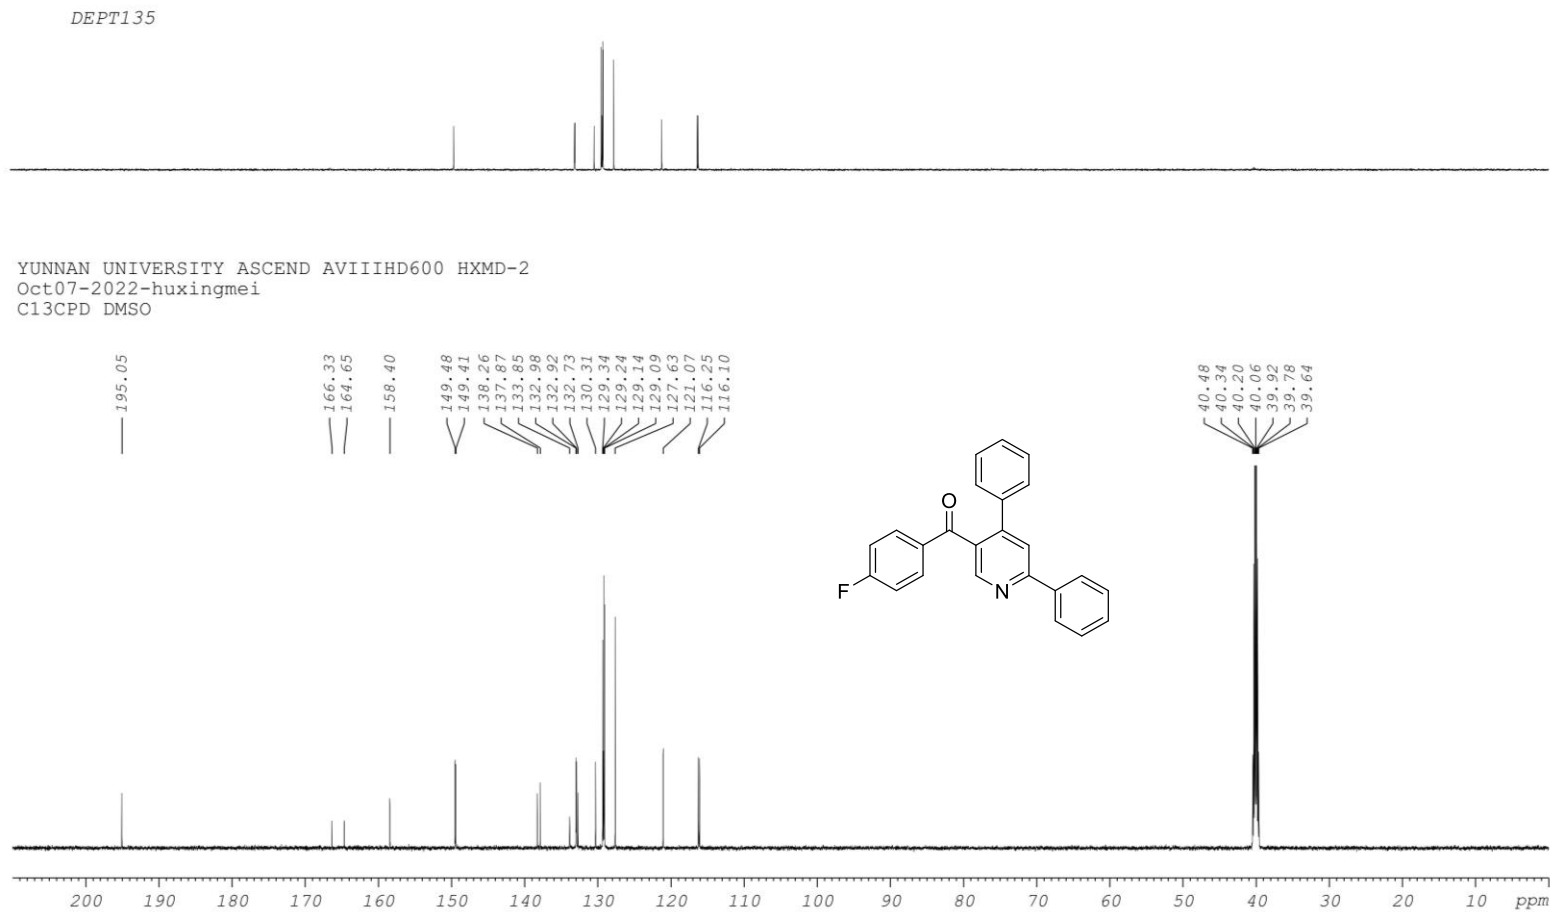

Figure S8.  $^{13}\text{C}$  NMR (150 MHz,  $\text{DMSO-}d_6$ ) spectra of compound **3c**

YUNNAN UNIVERSITY ASCEND AVIIIHD600 HXMD-2  
Oct07-2022-huxingmei  
F19CPD DMSO

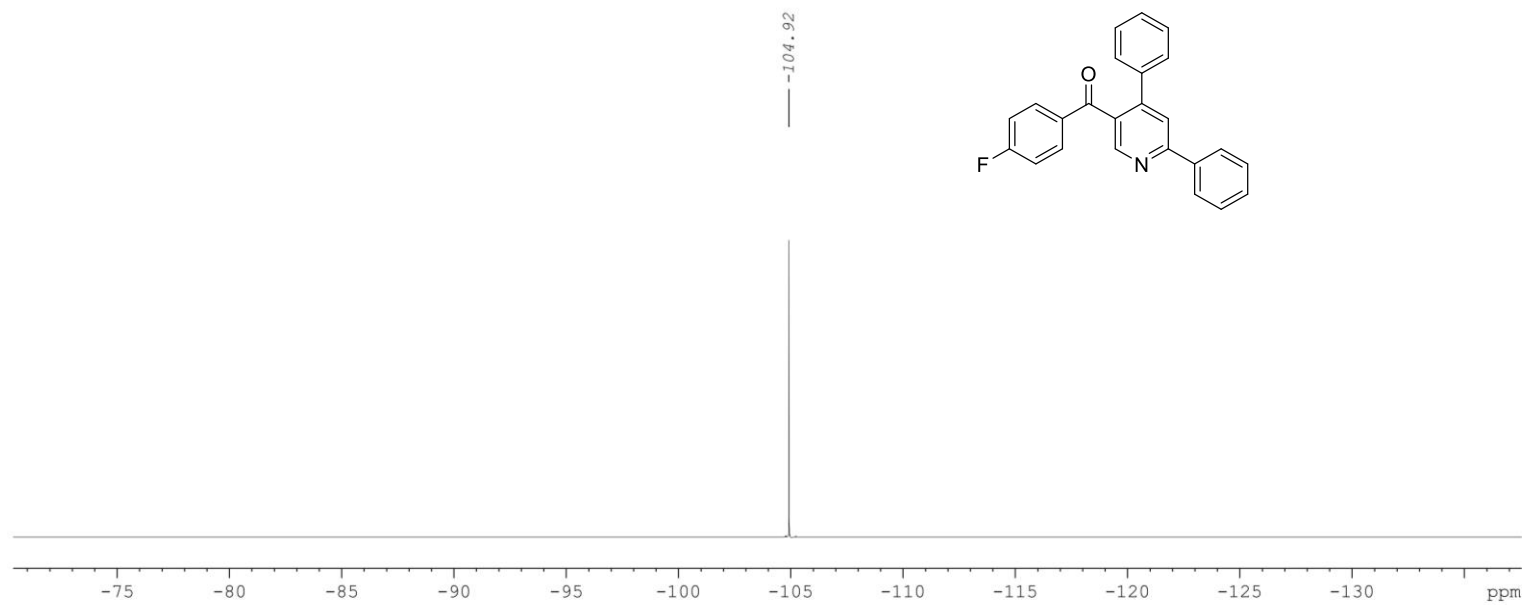

**Figure S9.**  $^{19}\text{F}$  NMR (564 MHz,  $\text{DMSO-}d_6$ ) spectra of compound **3c**



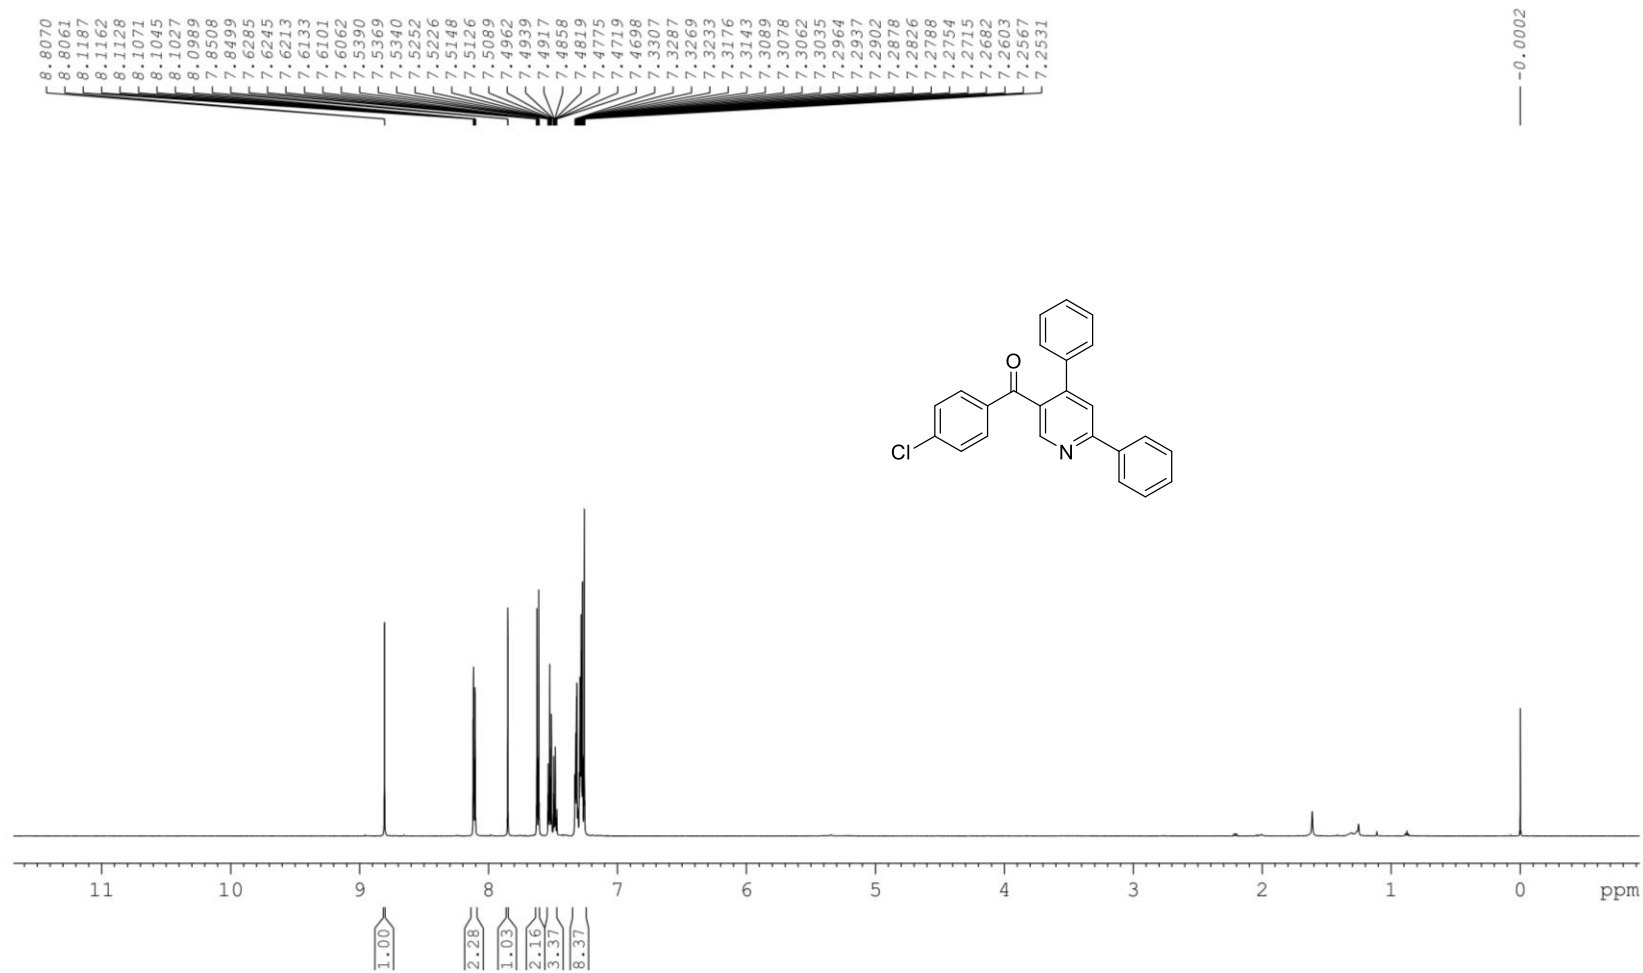

**Figure S10.** <sup>1</sup>H NMR (600 MHz, CDCl<sub>3</sub>) spectra of compound **3d**

DEPT135

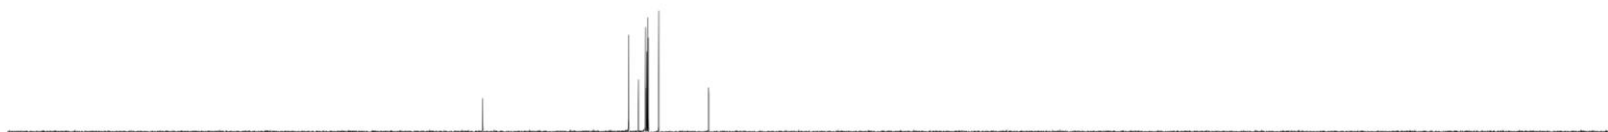

YUNNAN UNIVERSITY ASCEND AVIIIHD600 HXMD-42  
Nov28-2022-huxingmei  
C13CPD CDCl3

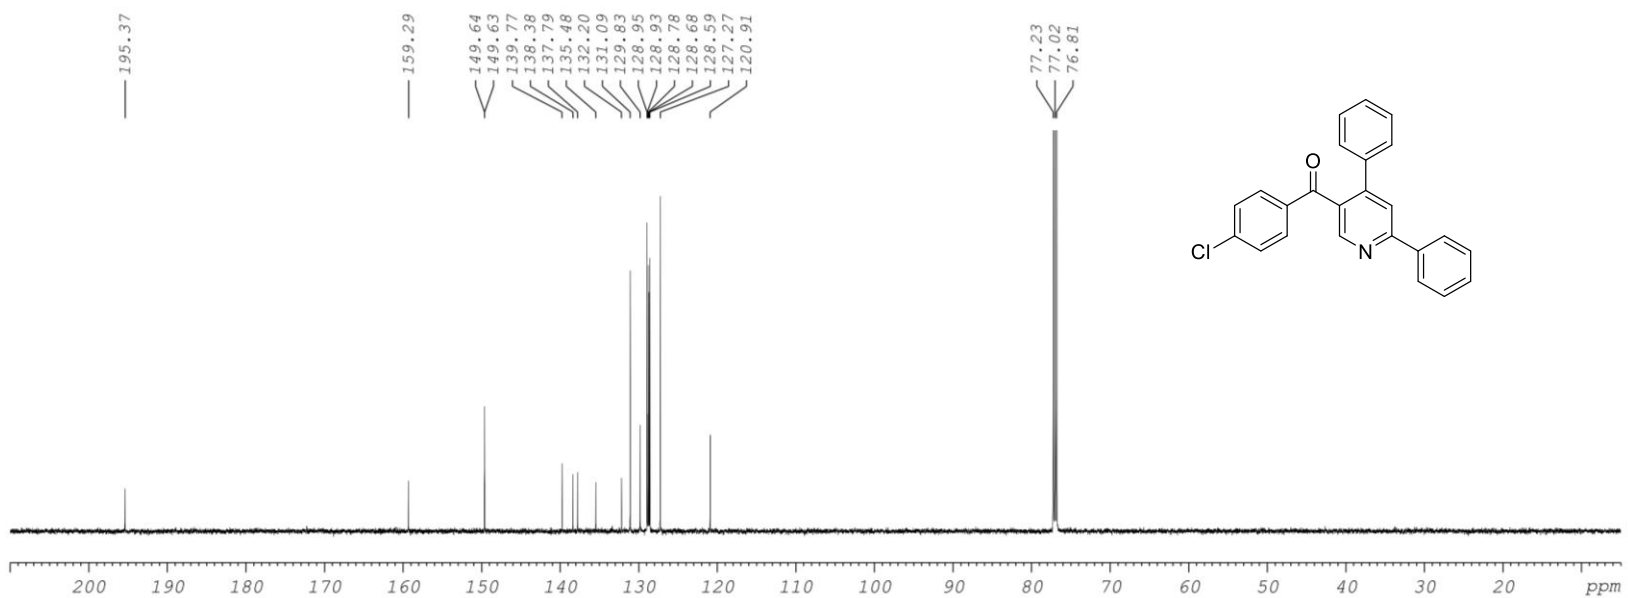

Figure S11.  $^{13}\text{C}$  NMR (150 MHz,  $\text{CDCl}_3$ ) spectra of compound 3d

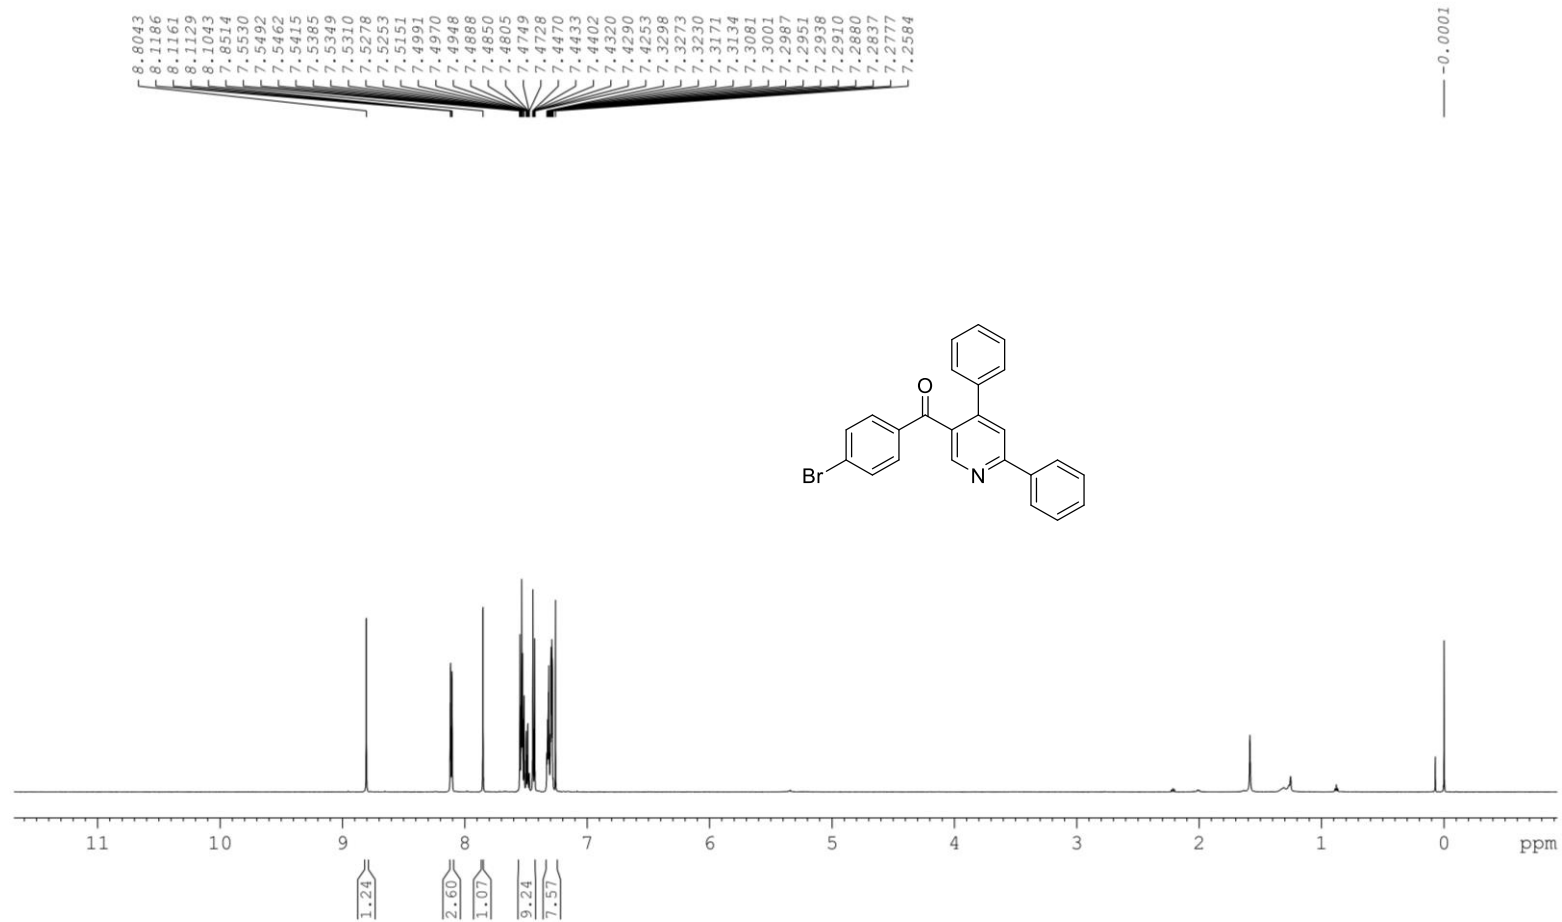

**Figure S12.** <sup>1</sup>H NMR (600 MHz, CDCl<sub>3</sub>) spectra of compound **3e**

DEPT135

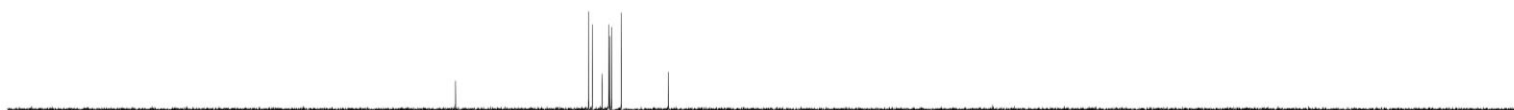

YUNNAN UNIVERSITY ASCEND AVIIIHD600 HXMD-6-1  
Nov28-2022-huxingmei  
C13CPD CDC13

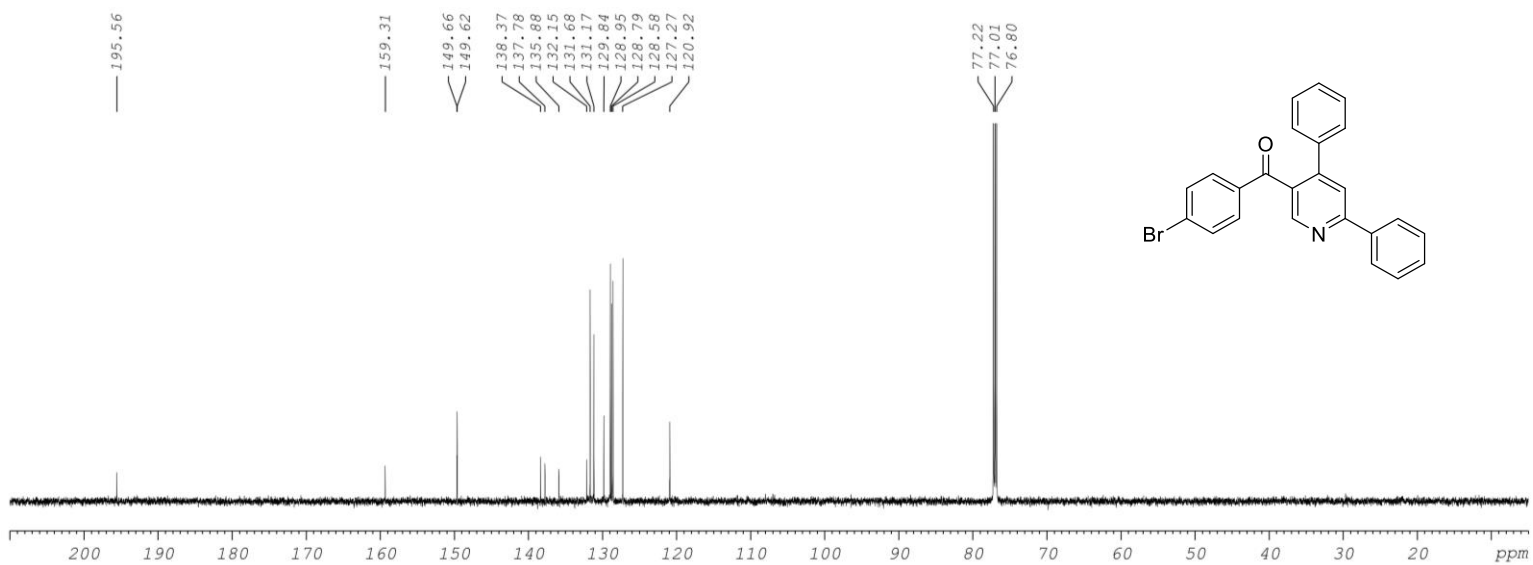

Figure S13.  $^{13}\text{C}$  NMR (150 MHz,  $\text{CDCl}_3$ ) spectra of compound 3e

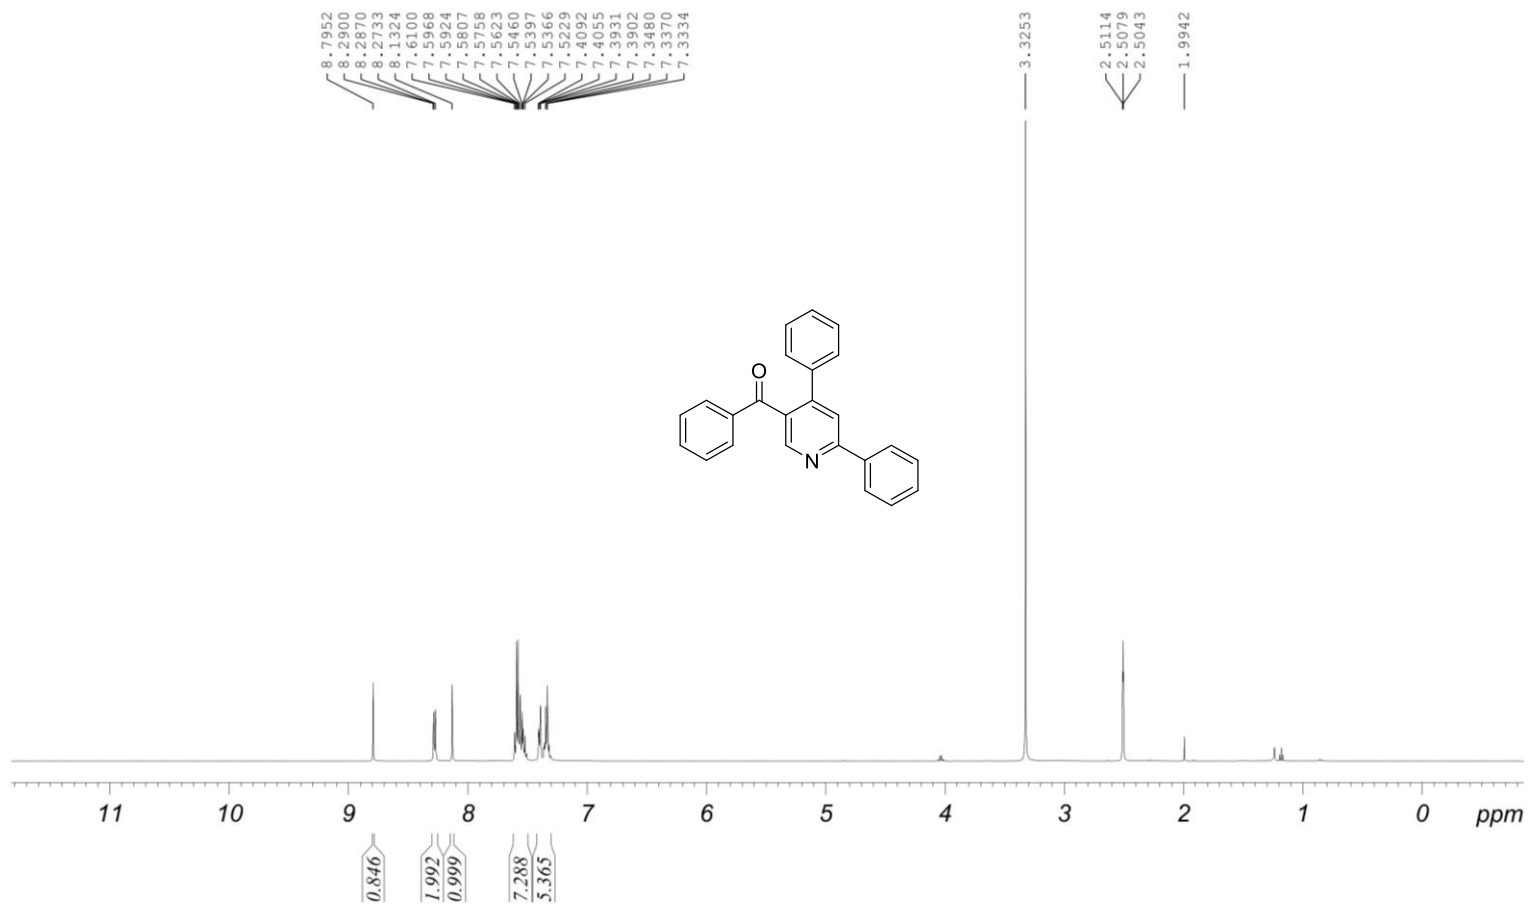

**Figure S14.** <sup>1</sup>H NMR (500 MHz, DMSO-*d*<sub>6</sub>) spectra of compound **3f**

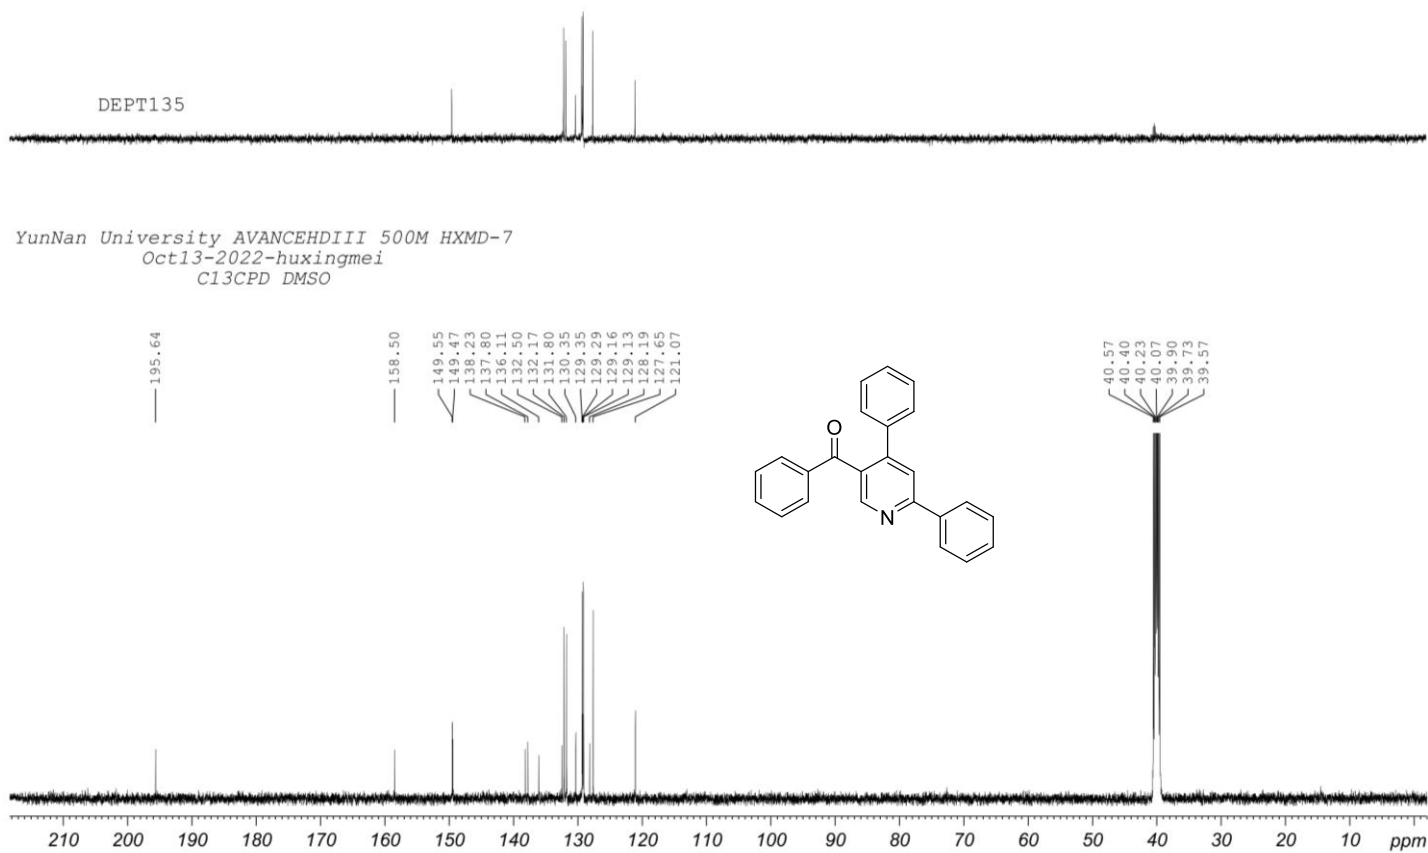

Figure S15.  $^{13}\text{C}$  NMR (125 MHz,  $\text{DMSO-}d_6$ ) spectra of compound **3f**

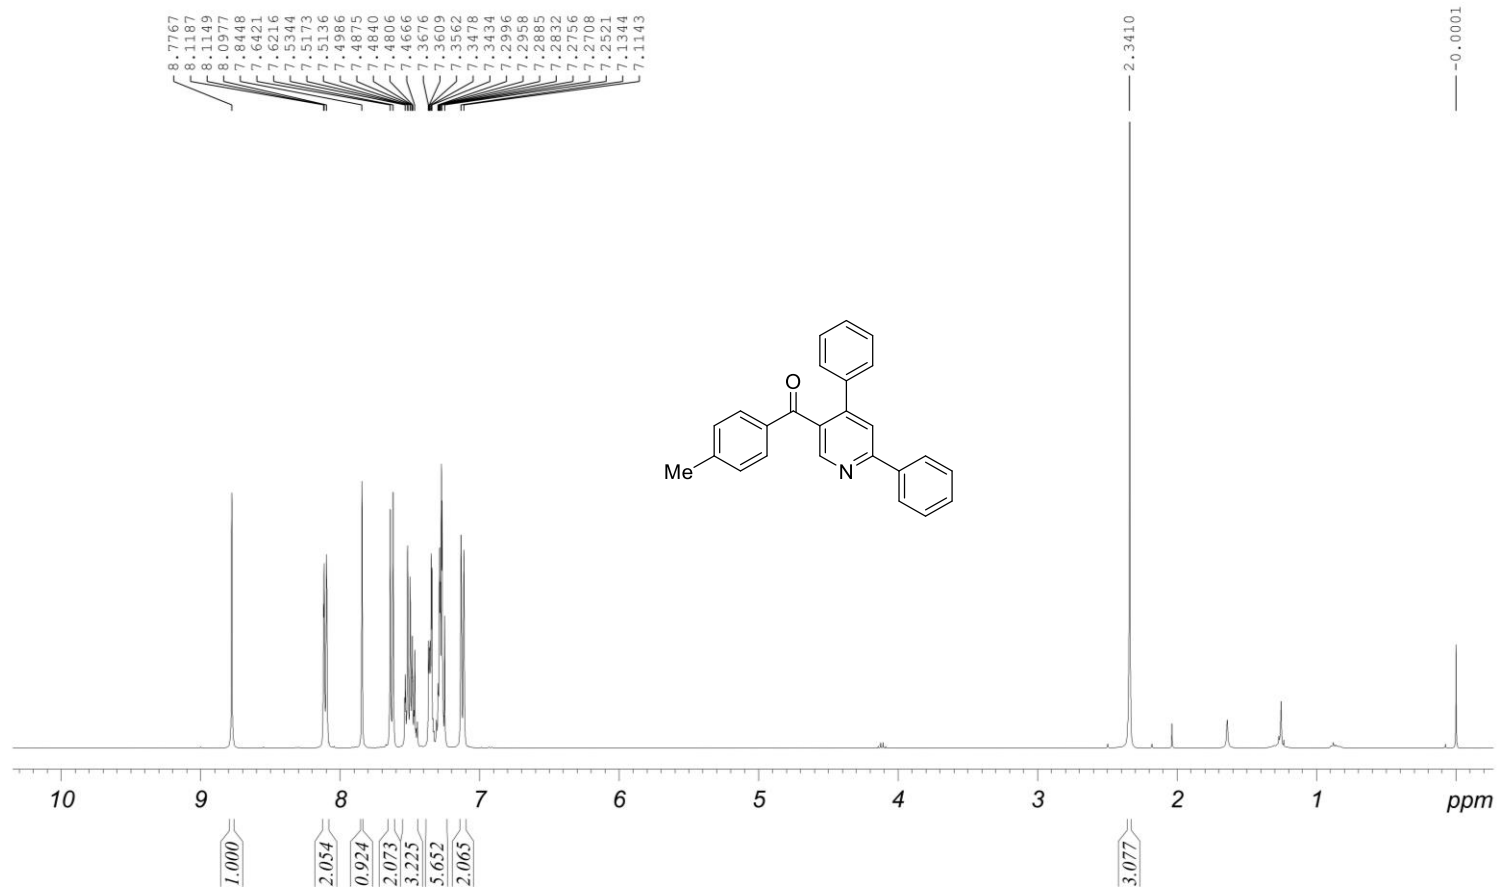

**Figure S16.** <sup>1</sup>H NMR (400 MHz, CDCl<sub>3</sub>) spectra of compound **3g**

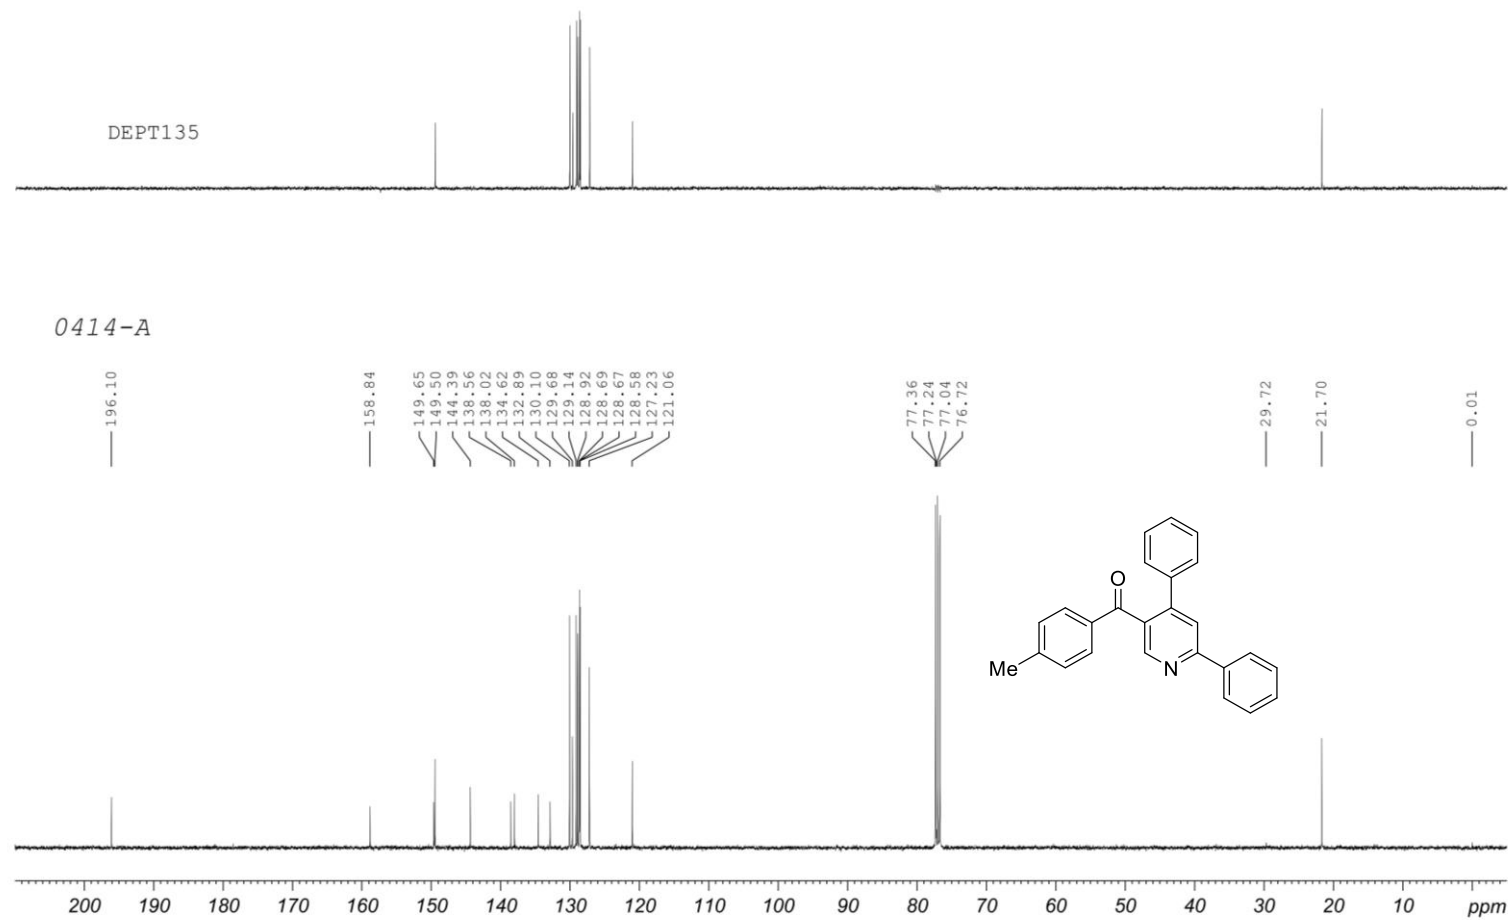

**Figure S17.**  $^{13}\text{C}$  NMR (100 MHz,  $\text{CDCl}_3$ ) spectra of compound **3g**



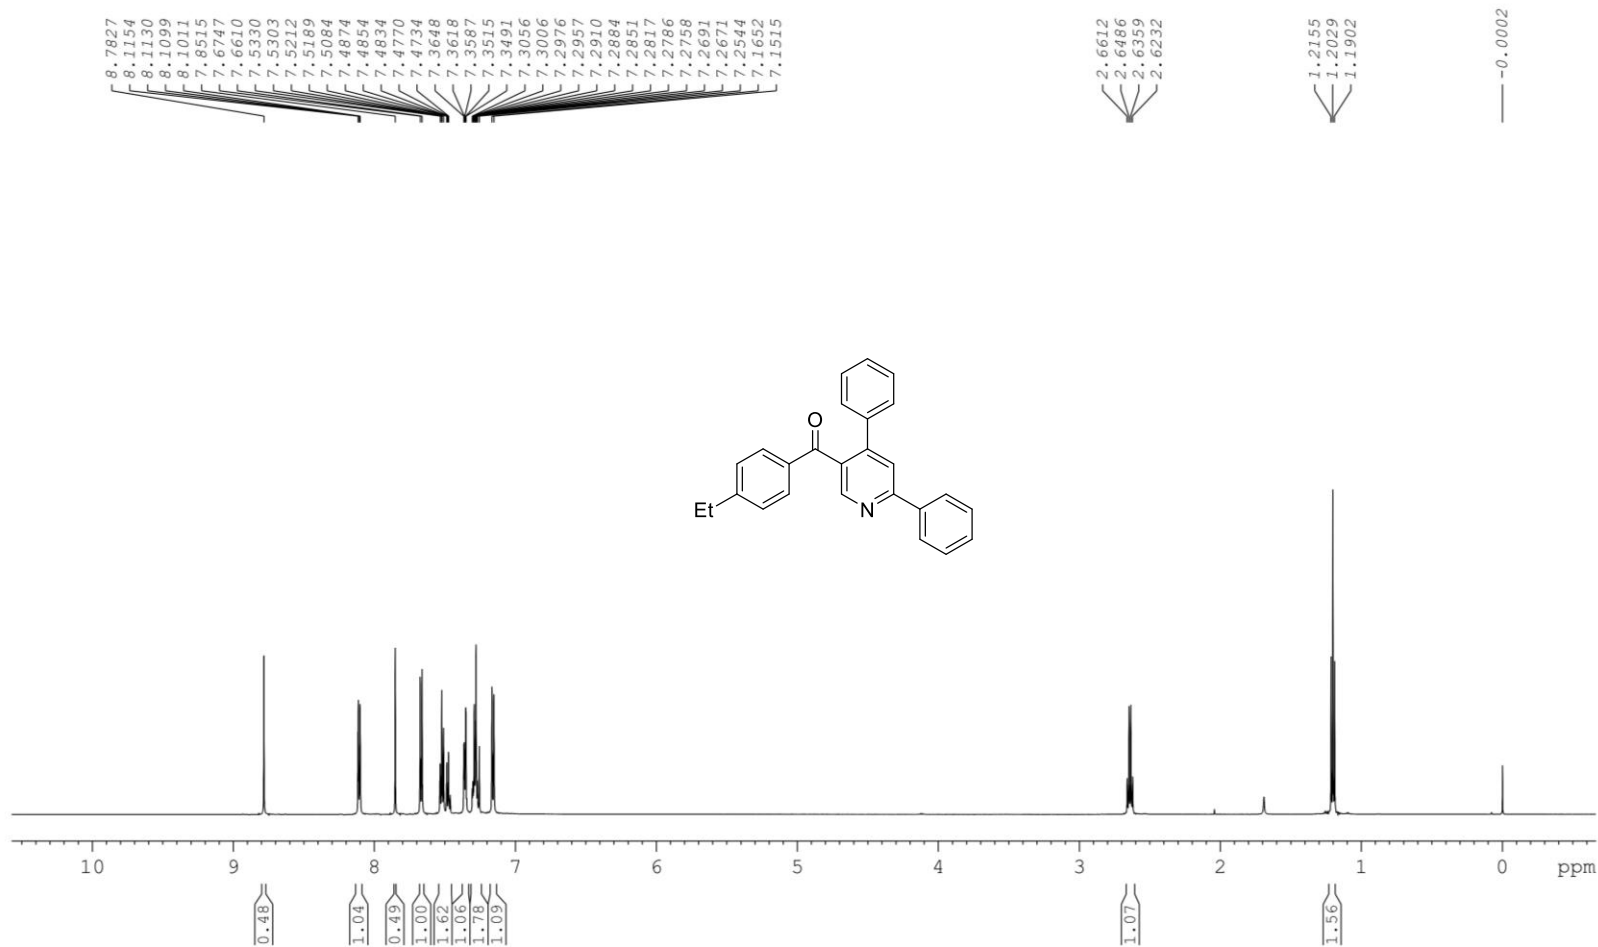

**Figure S18.** <sup>1</sup>H NMR (600 MHz, CDCl<sub>3</sub>) spectra of compound 3h

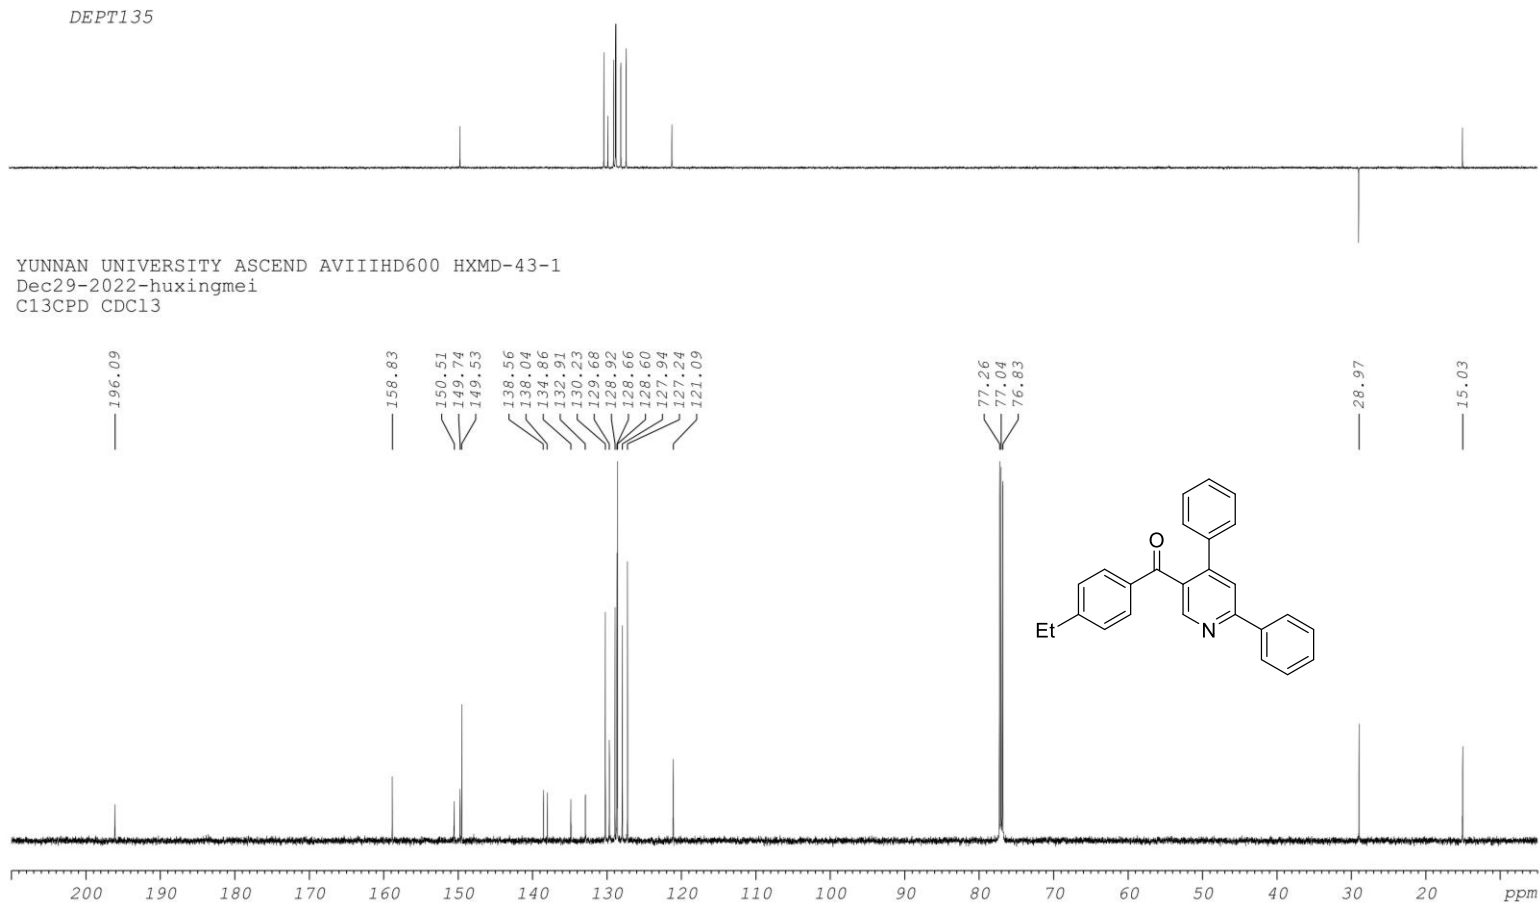

**Figure S19.**  $^{13}\text{C}$  NMR (150 MHz,  $\text{CDCl}_3$ ) spectra of compound **3h**

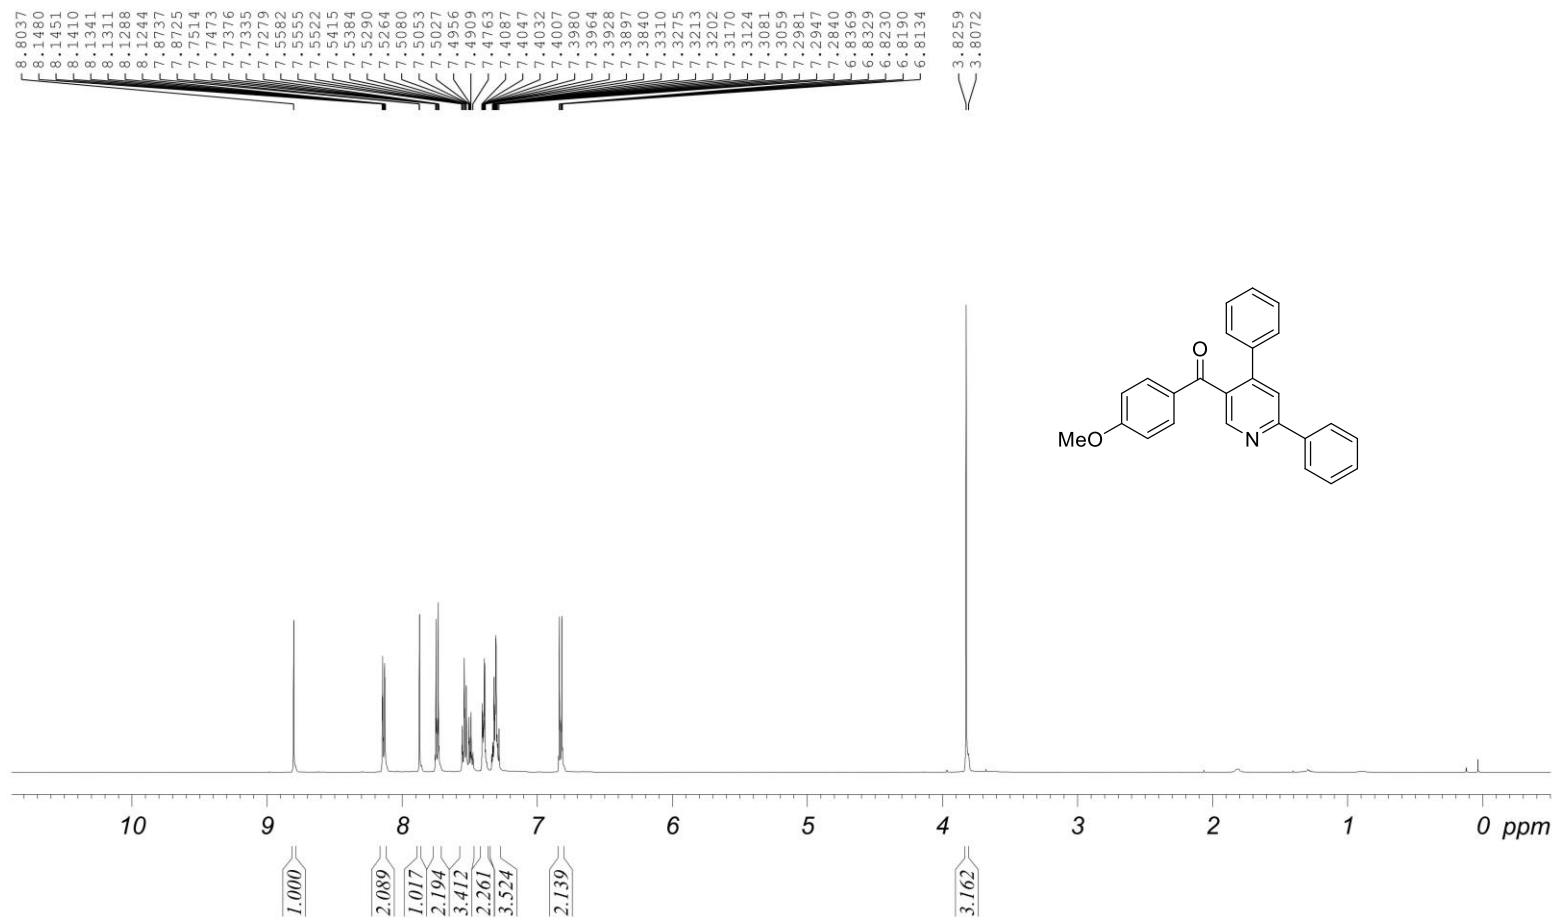

**Figure S20.** <sup>1</sup>H NMR (600 MHz, CDCl<sub>3</sub>) spectra of compound **3i**

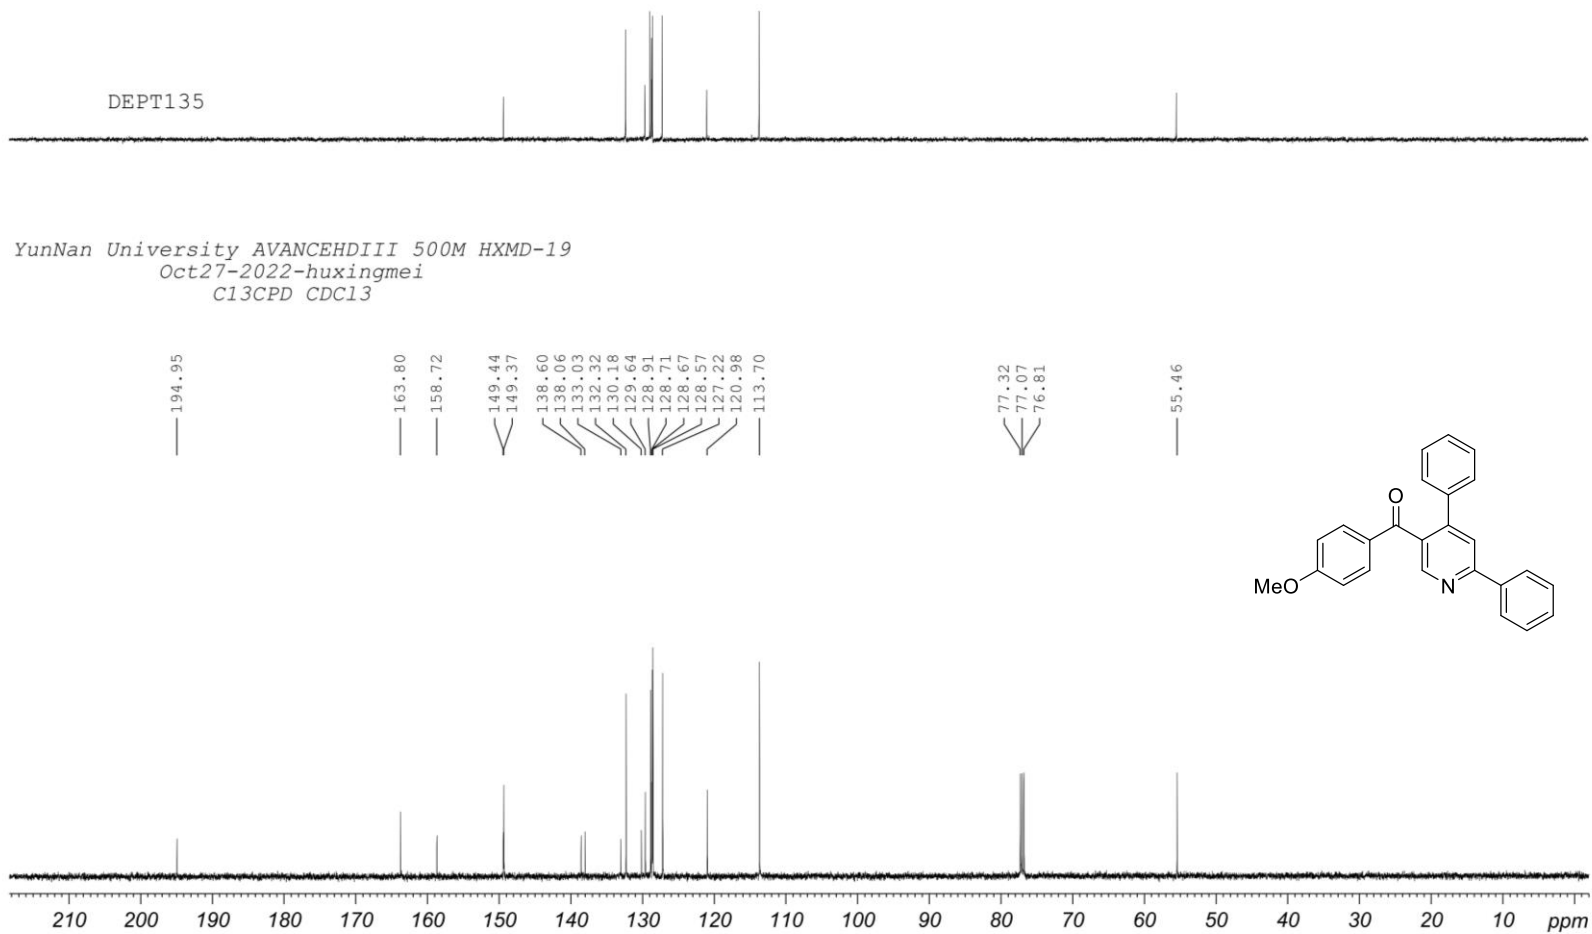

**Figure S21.**  $^{13}\text{C}$  NMR (150 MHz,  $\text{CDCl}_3$ ) spectra of compound **3i**

0417-A

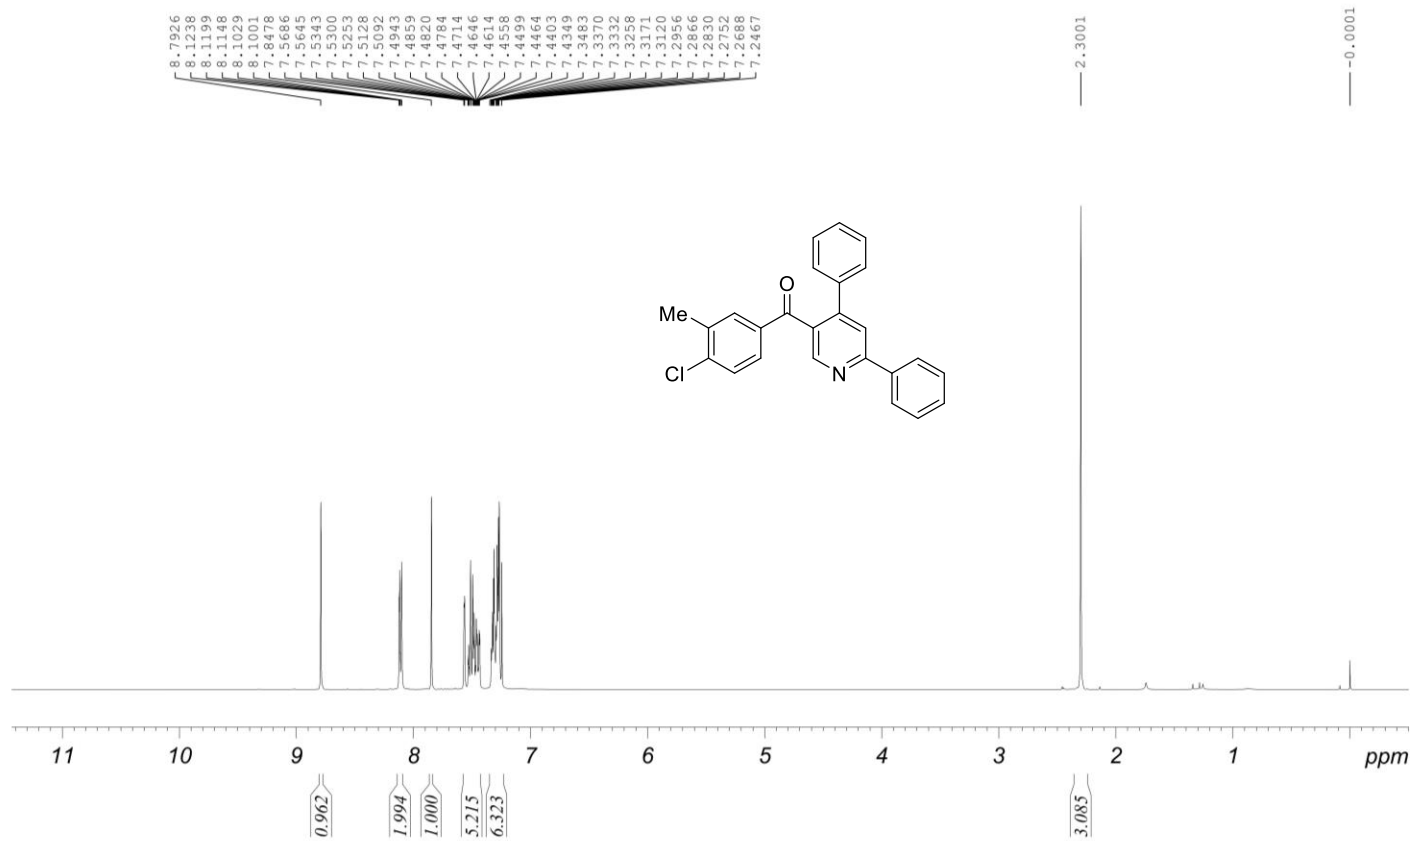

Figure S22. <sup>1</sup>H NMR (400 MHz, CDCl<sub>3</sub>) spectra of compound 3j

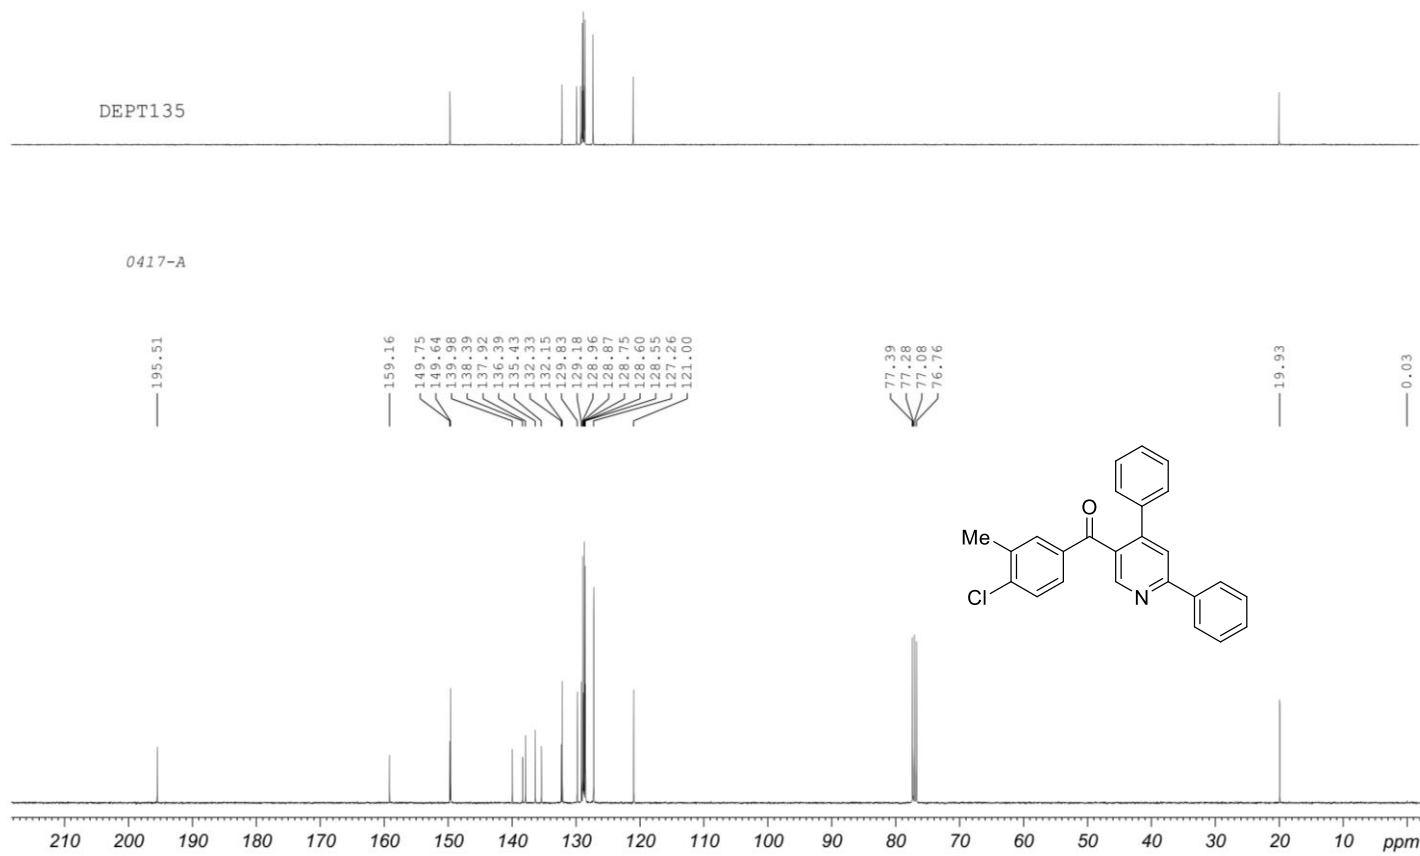

**Figure S23.**  $^{13}\text{C}$  NMR (100 MHz,  $\text{CDCl}_3$ ) spectra of compound **3j**

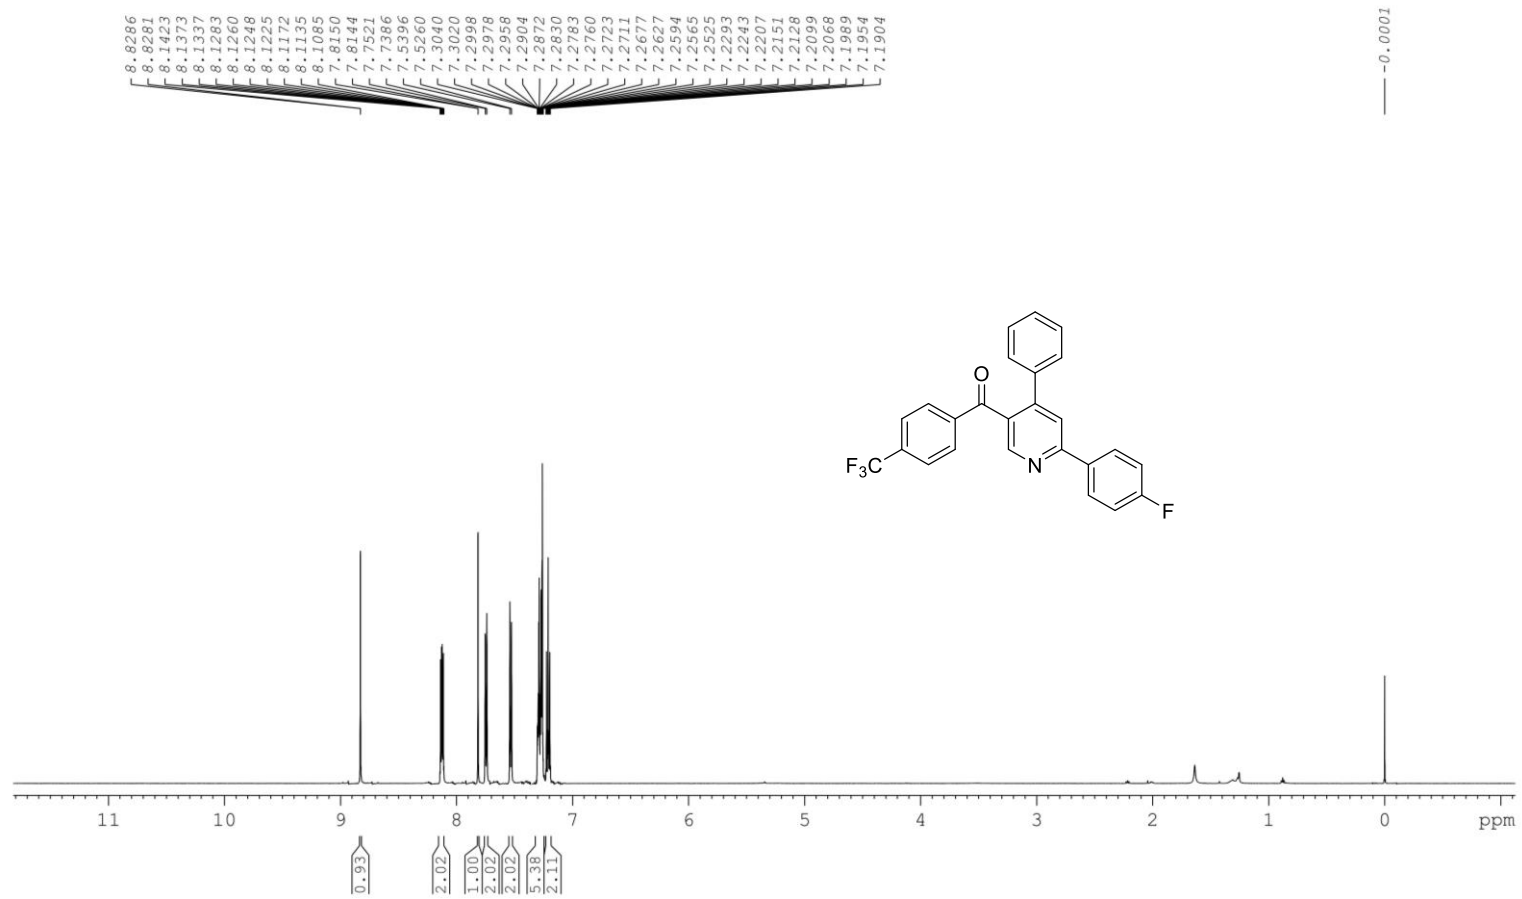

**Figure S24.** <sup>1</sup>H NMR (600 MHz, CDCl<sub>3</sub>) spectra of compound **3k**

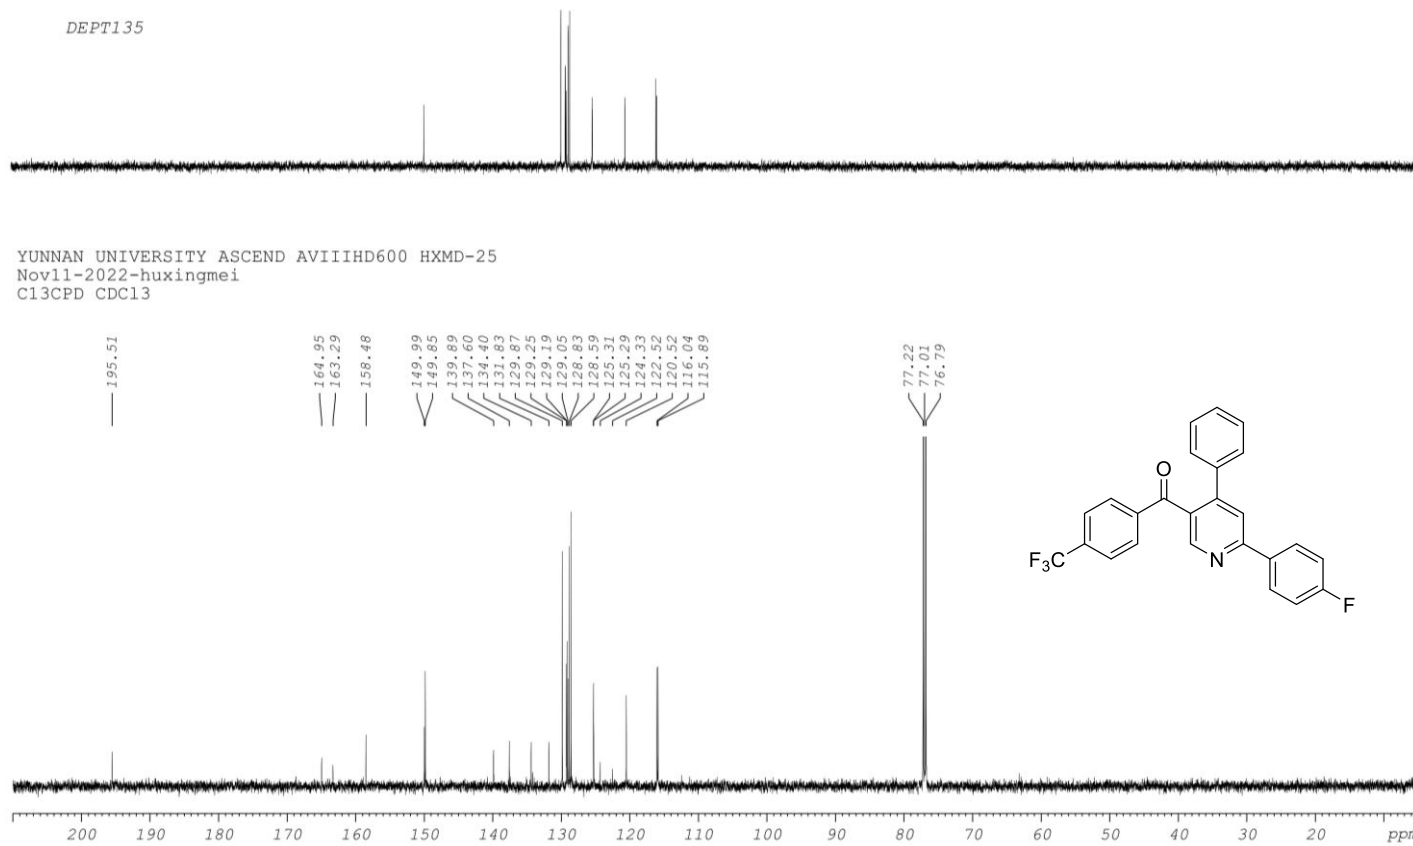

**Figure S25.**  $^{13}\text{C}$  NMR (150 MHz,  $\text{CDCl}_3$ ) spectra of compound **3k**



YUNNAN UNIVERSITY ASCEND AVIIIHD600 HXMD-25  
Nov11-2022-huxingmei  
F19CPD CDC13

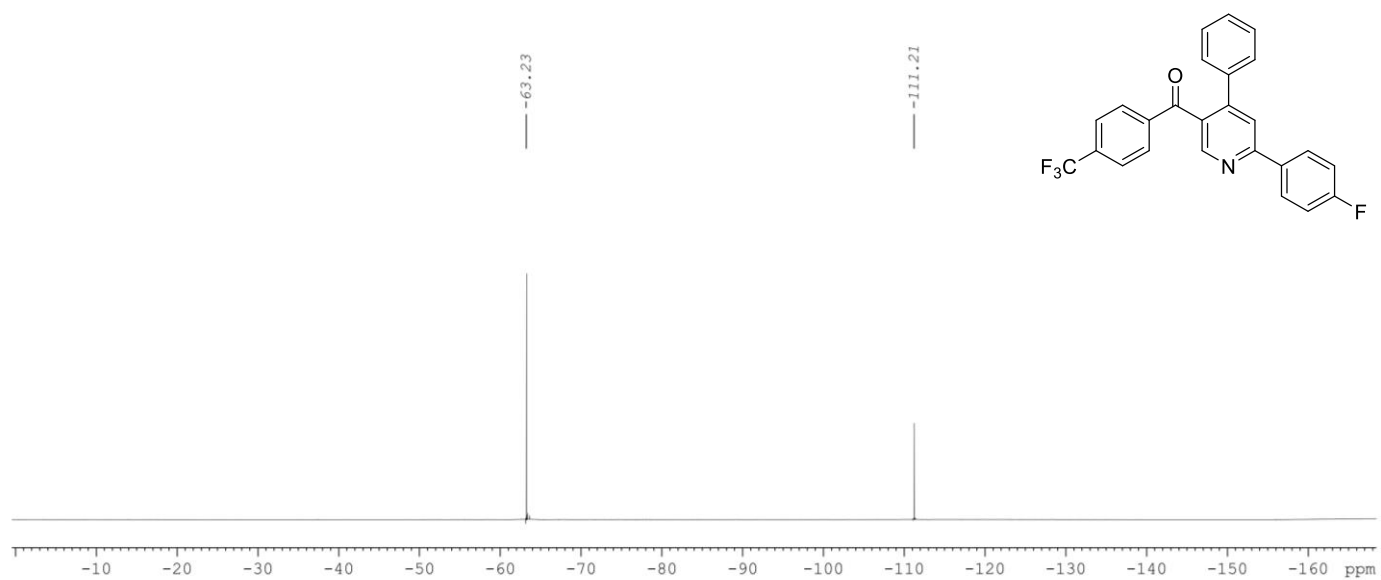

**Figure S26.**  $^{19}\text{F}$  NMR (564 MHz,  $\text{CDCl}_3$ ) spectra of compound **3k**

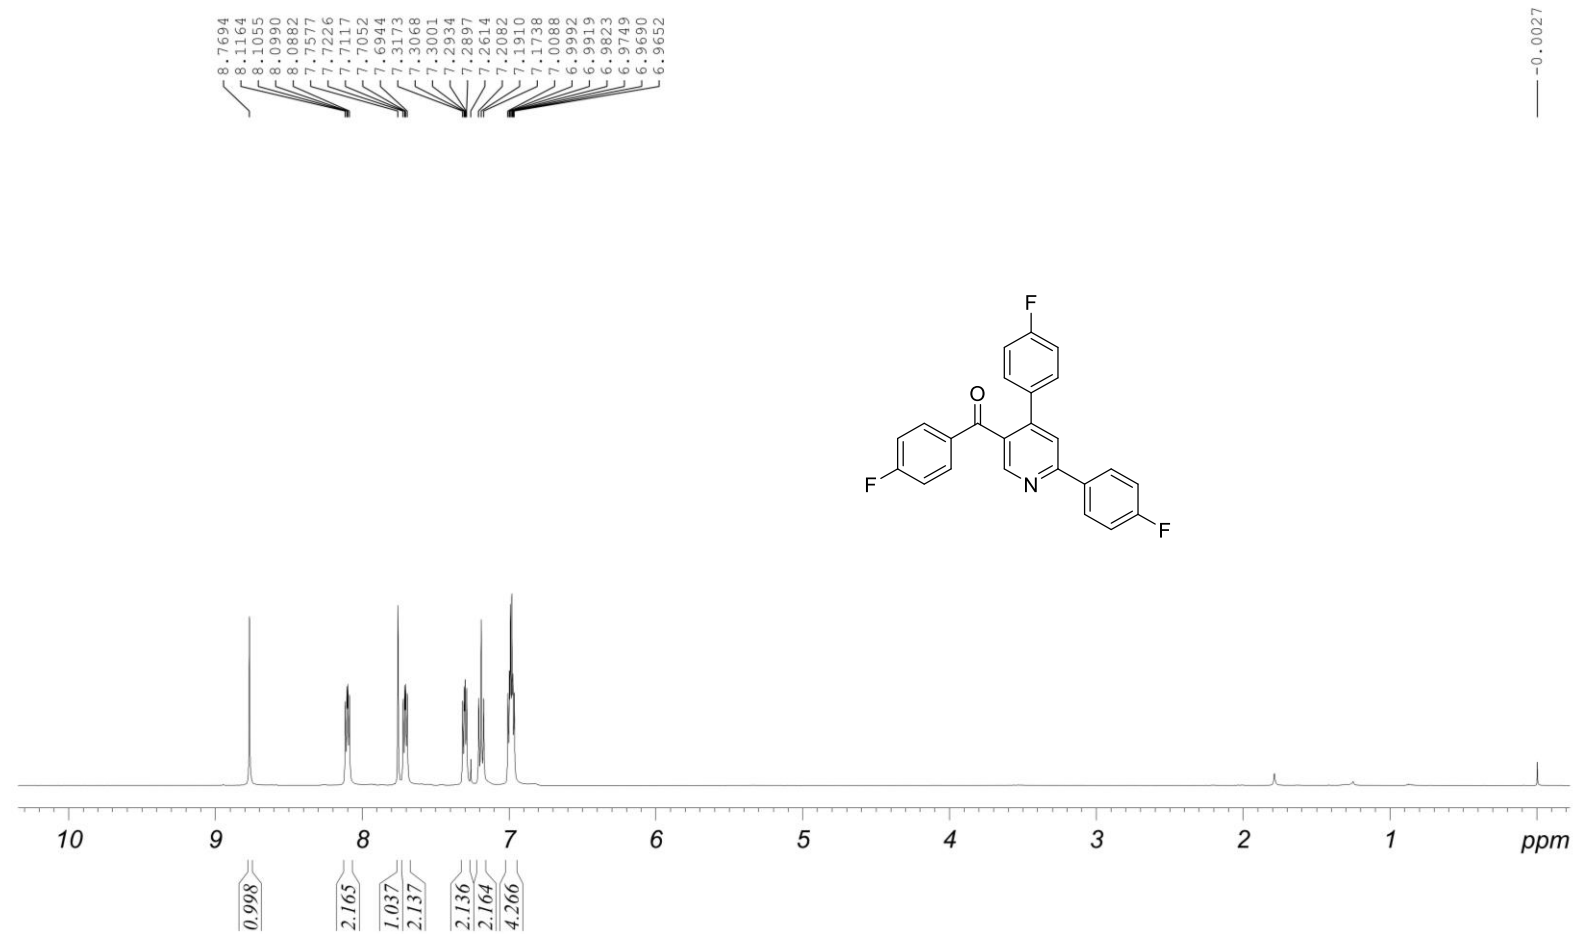

**Figure S27.**  $^1\text{H}$  NMR (500 MHz,  $\text{CDCl}_3$ ) spectra of compound **31**

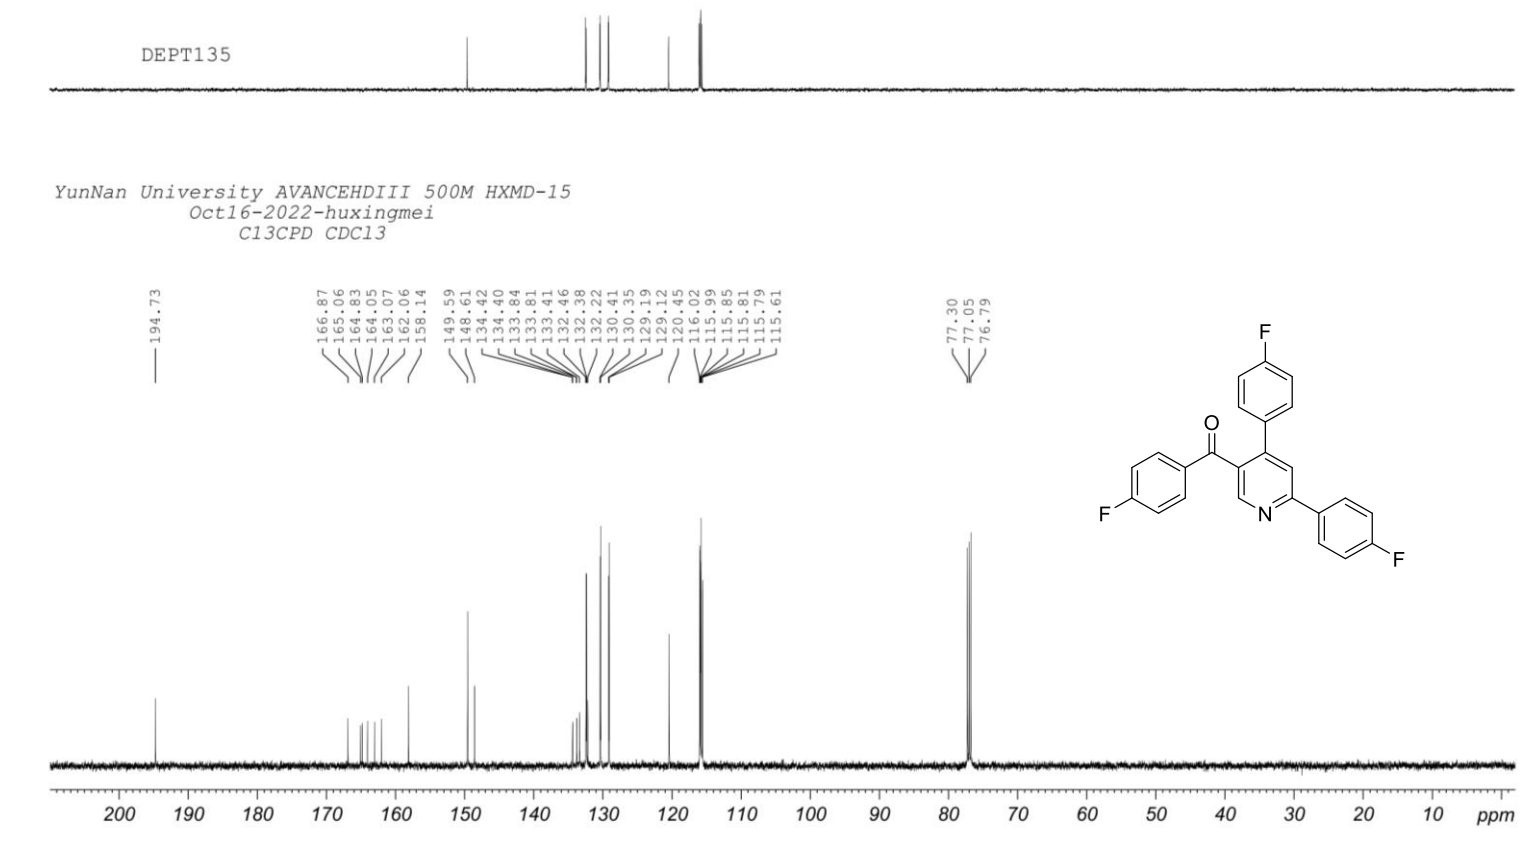

Figure S28.  $^{13}\text{C}$  NMR (125 MHz,  $\text{CDCl}_3$ ) spectra of compound **31**

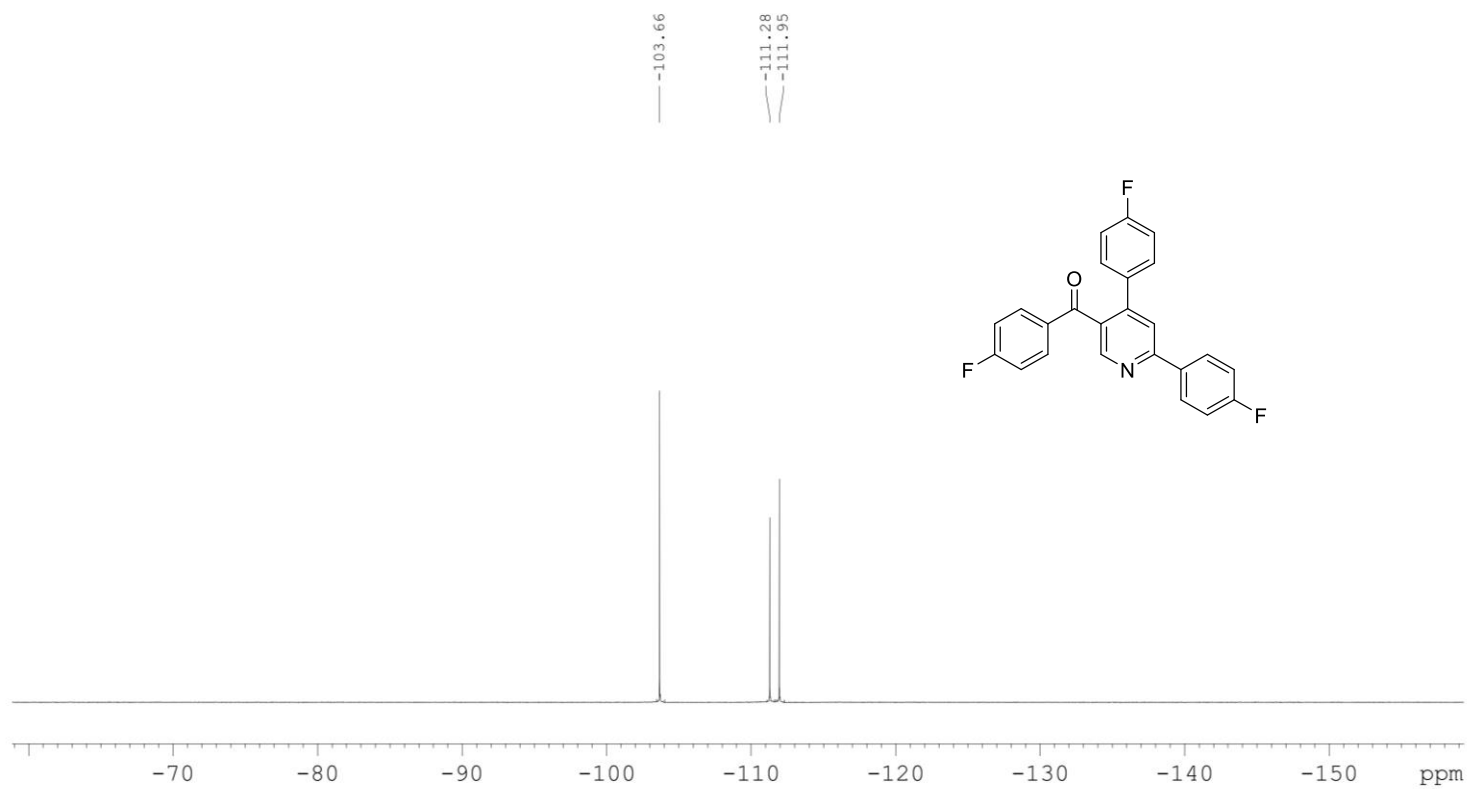

**Figure S29.**  $^{19}\text{F}$  NMR (470 MHz,  $\text{CDCl}_3$ ) spectra of compound **31**

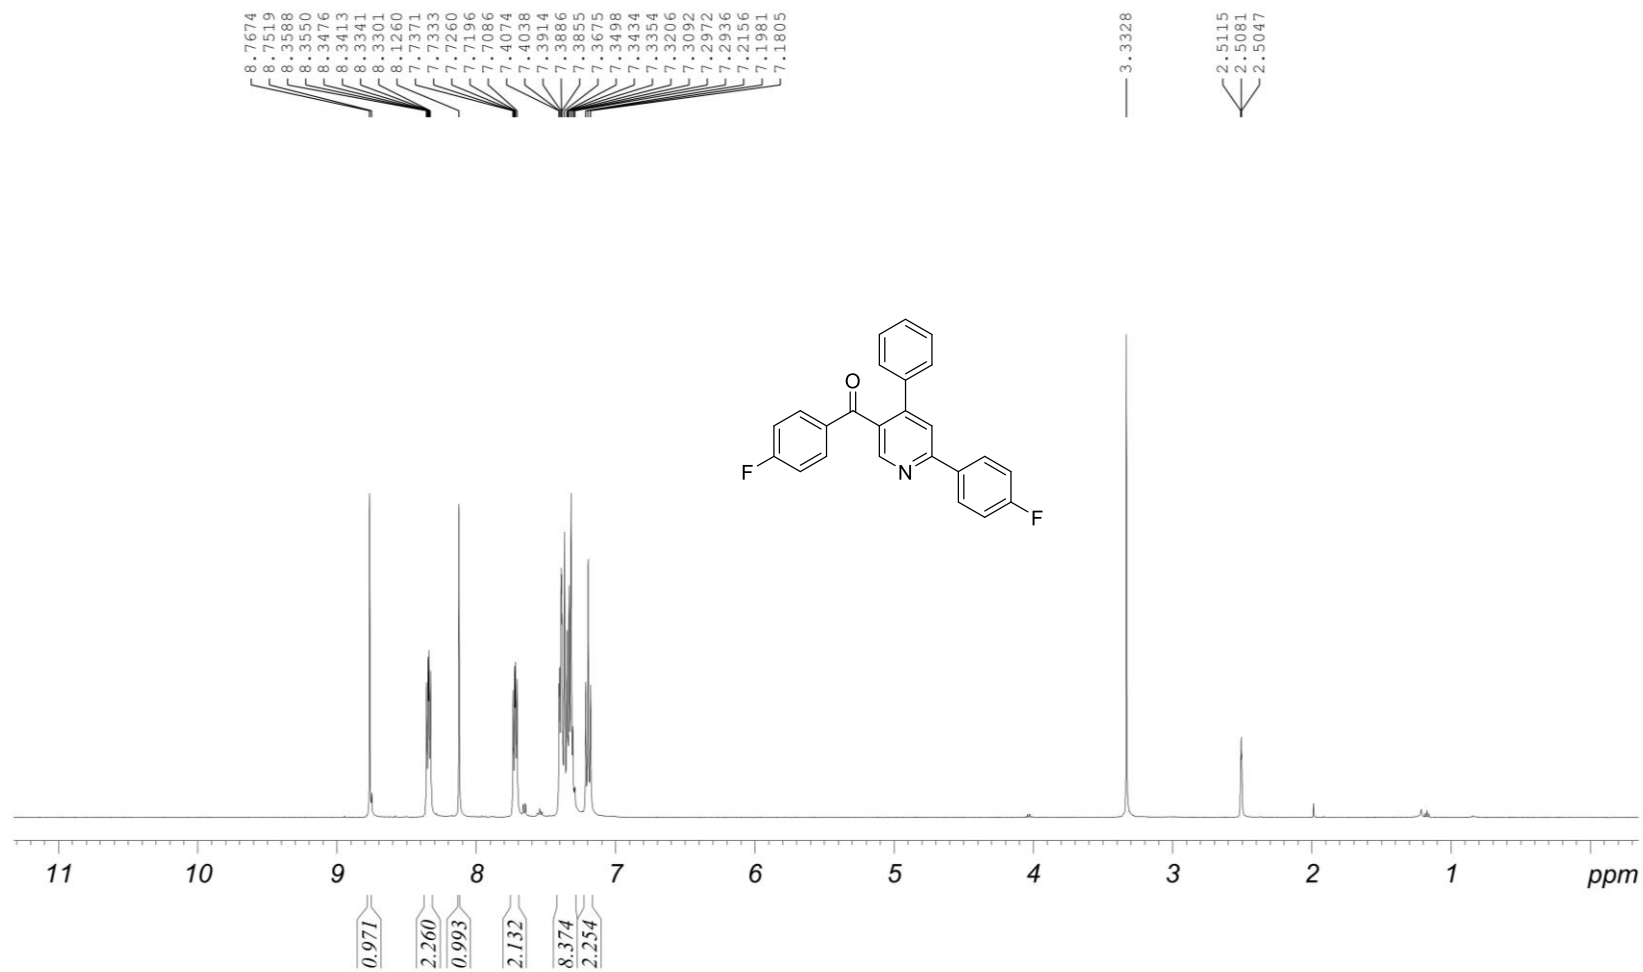

**Figure S30.** <sup>1</sup>H NMR (500 MHz, DMSO-*d*<sub>6</sub>) spectra of compound **3m**

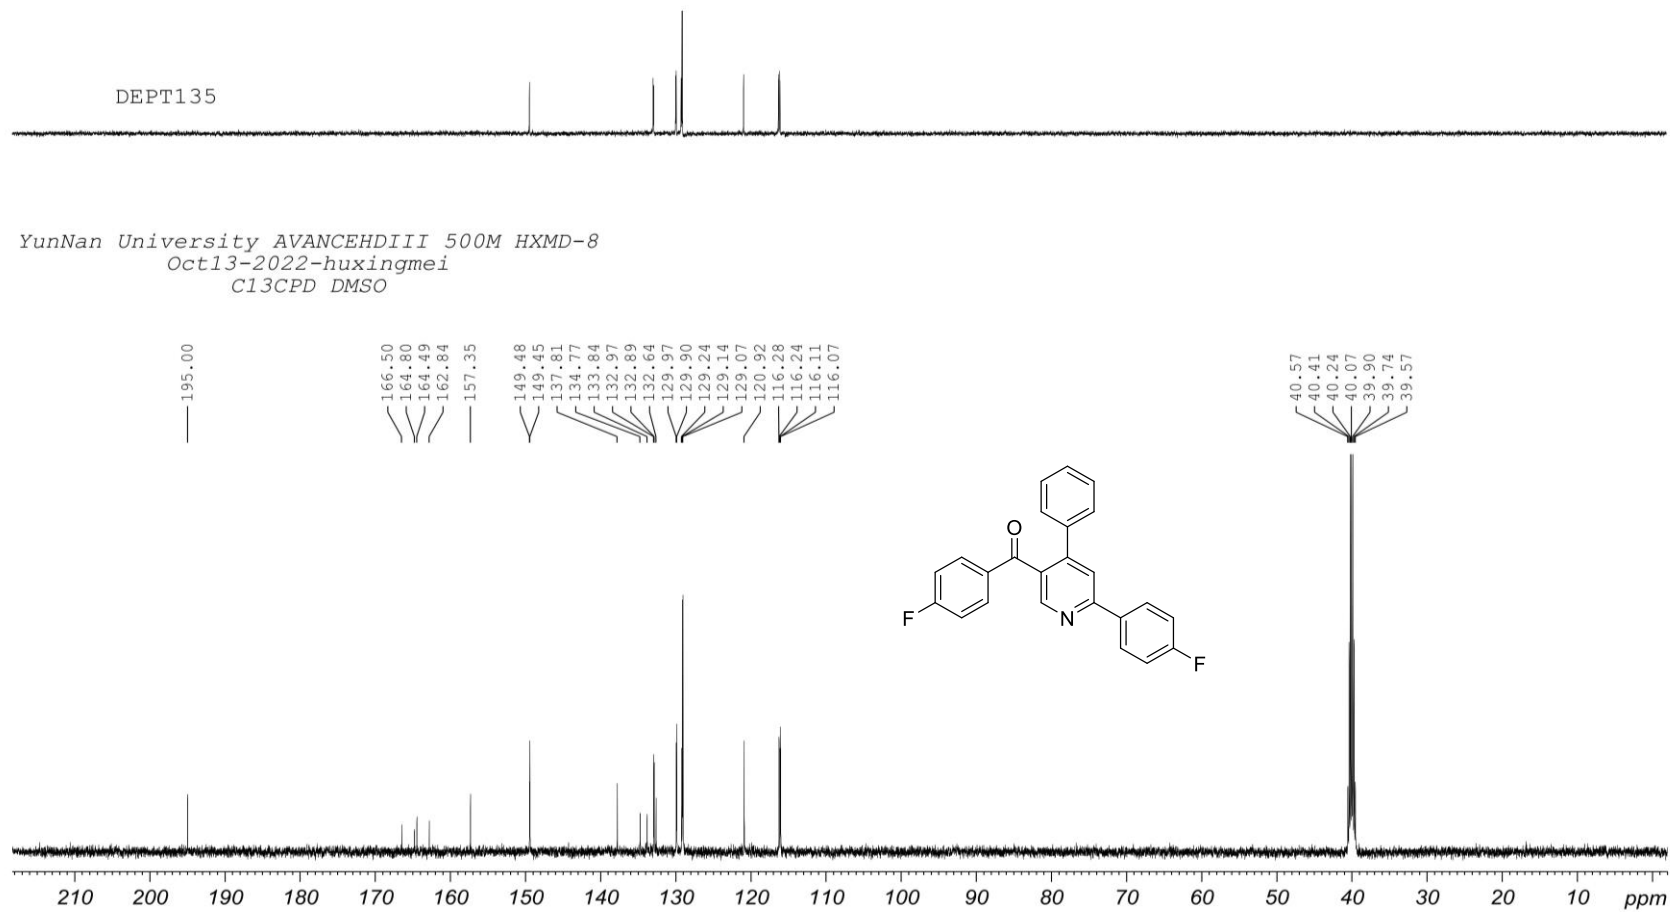

Figure S31.  $^{13}\text{C}$  NMR (125 MHz,  $\text{DMSO-}d_6$ ) spectra of compound **3m**

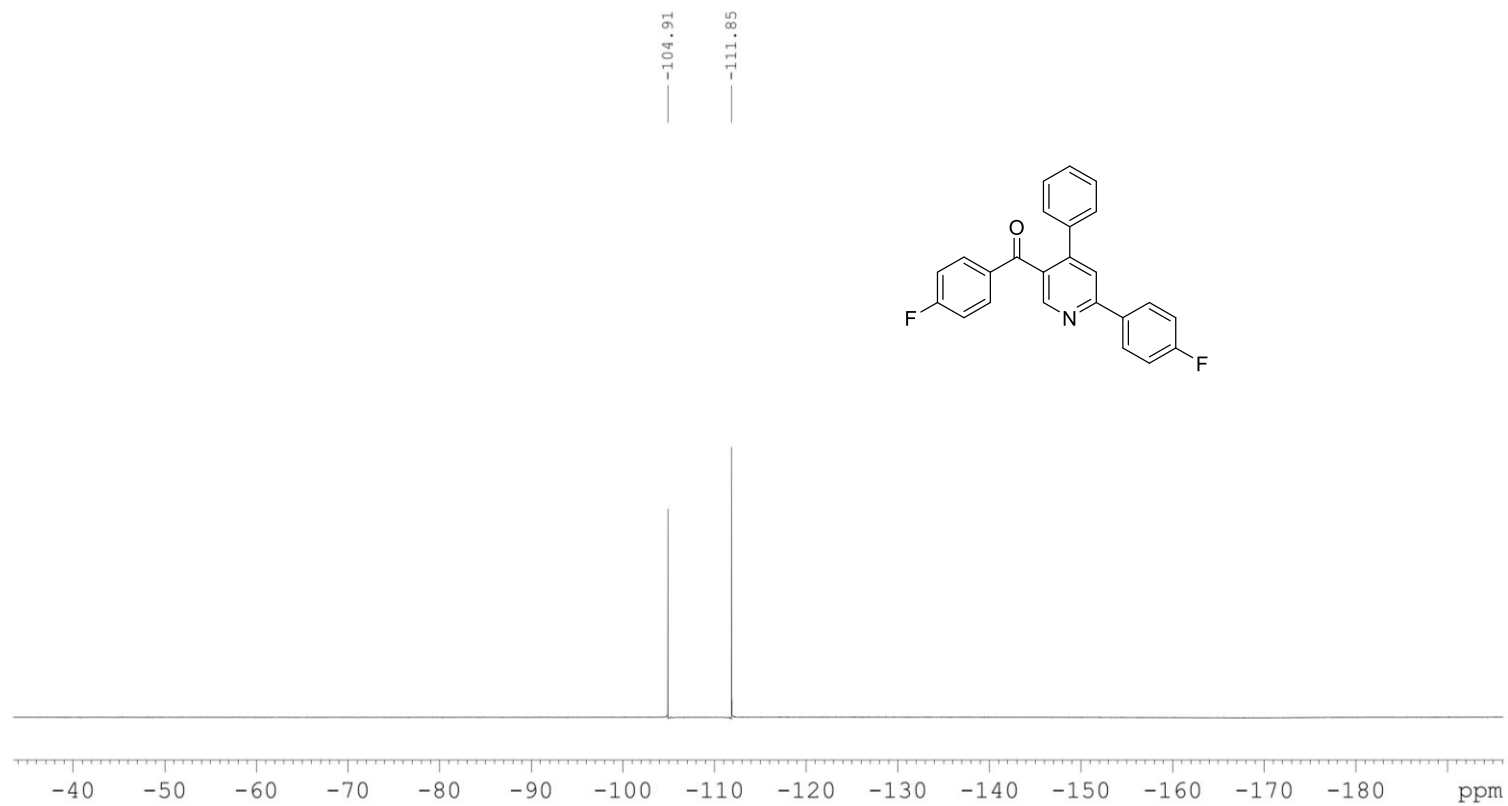

**Figure S32.**  $^{19}\text{F}$  NMR (470 MHz,  $\text{DMSO-}d_6$ ) spectra of compound **3m**

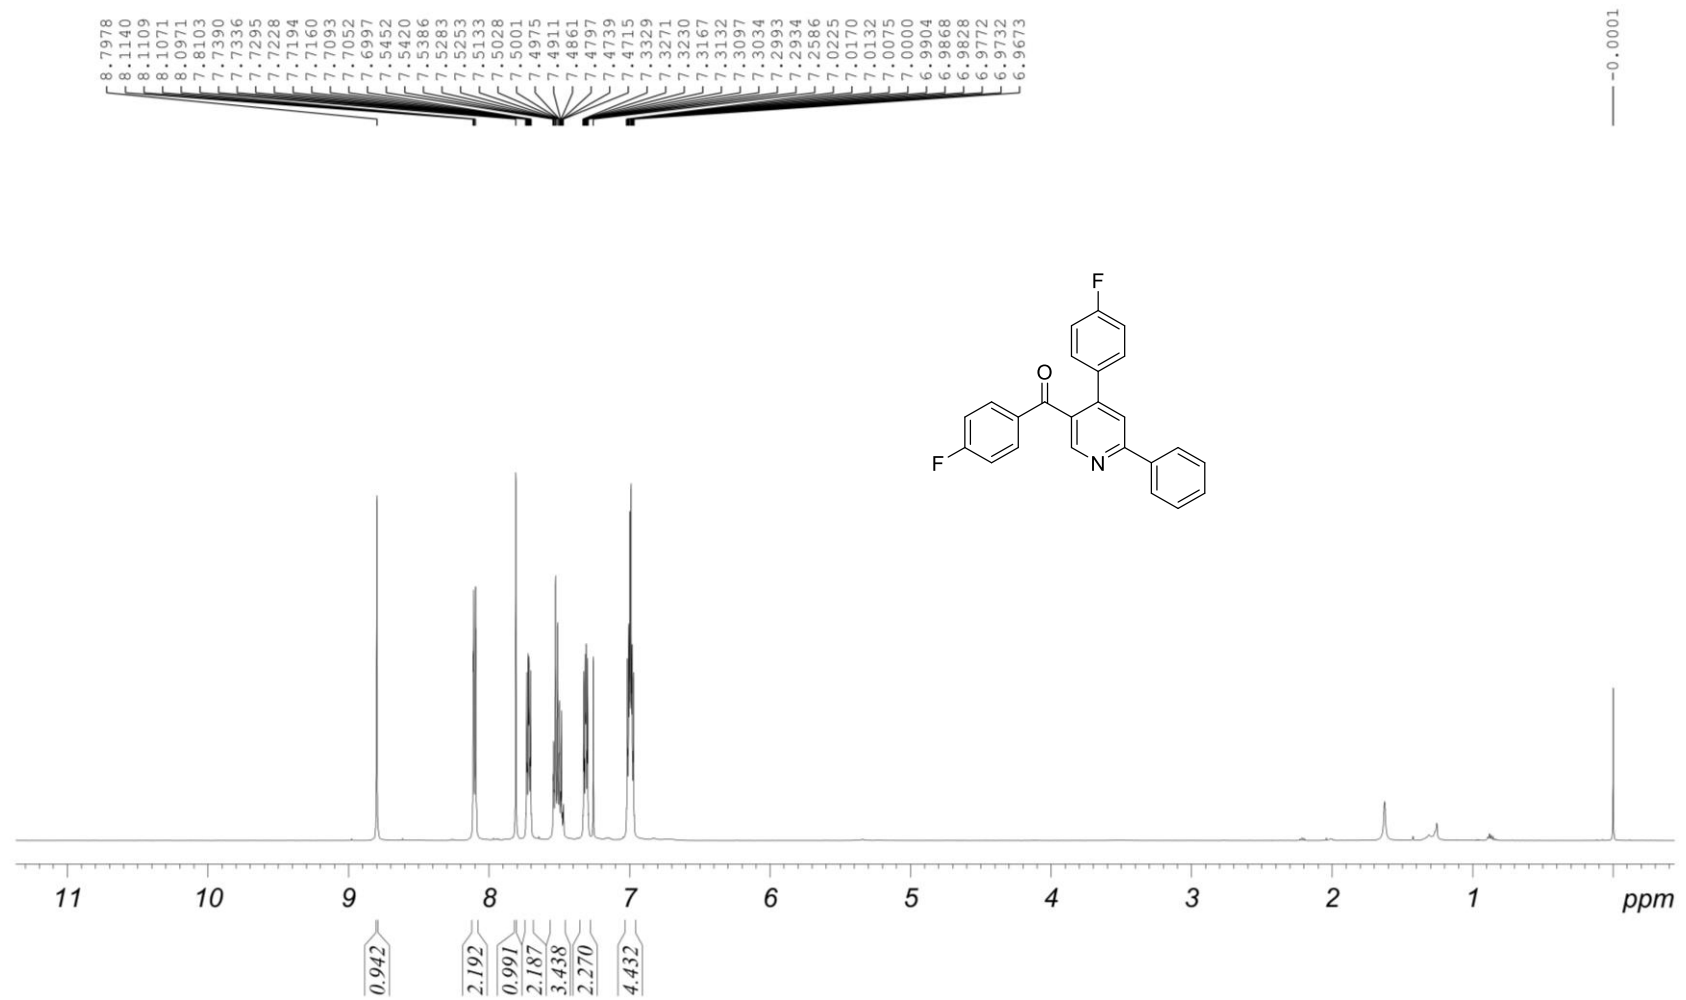

Figure S33. <sup>1</sup>H NMR (500 MHz, CDCl<sub>3</sub>) spectra of compound **3n**



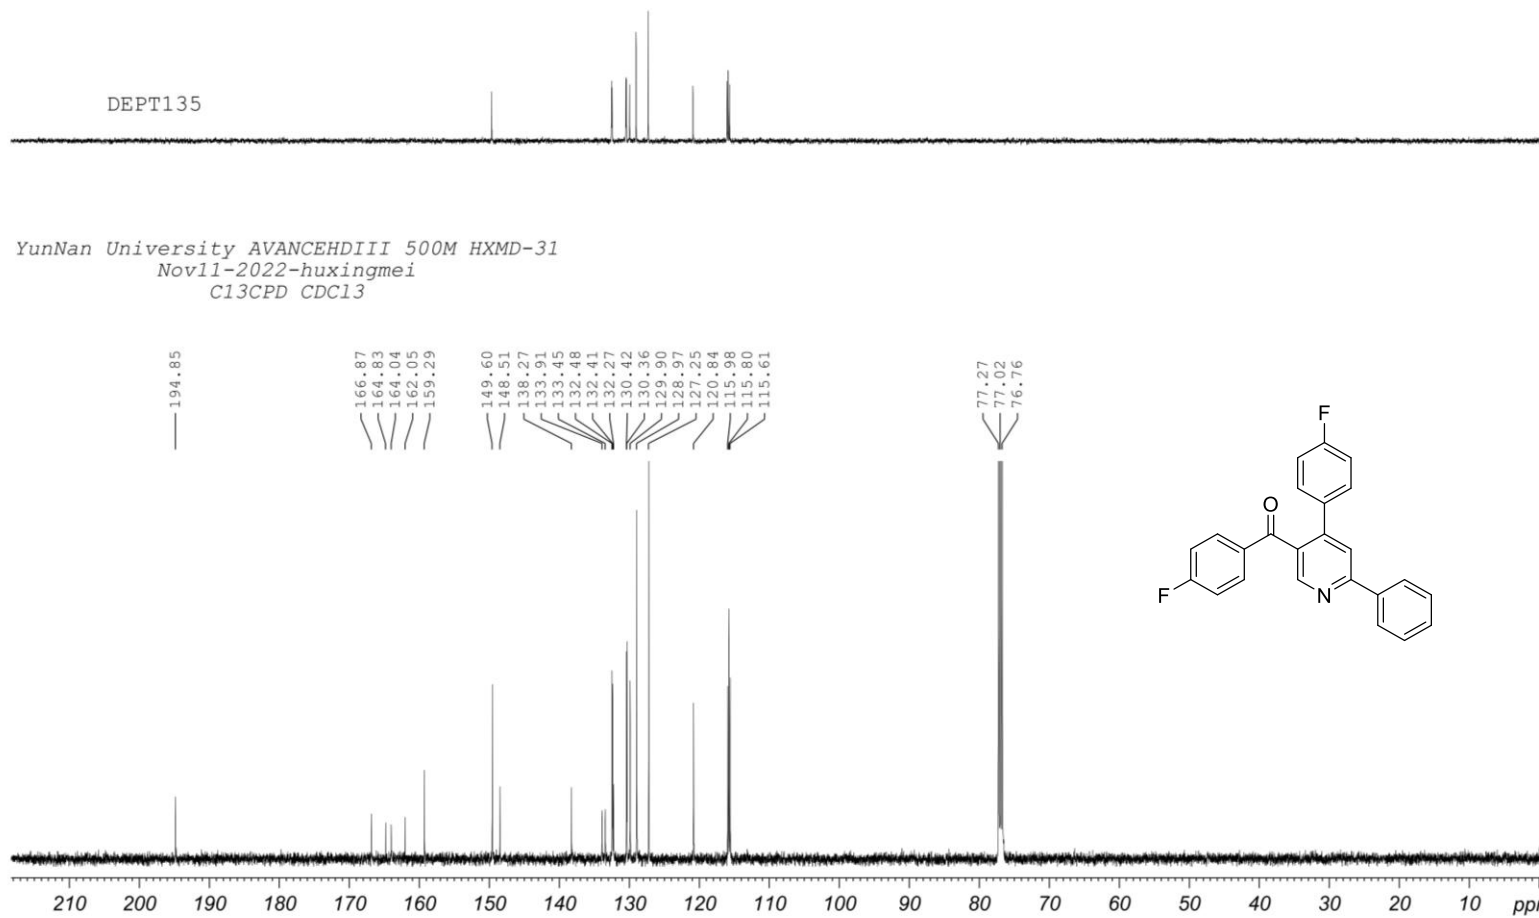

**Figure S34.**  $^{13}\text{C}$  NMR (125 MHz,  $\text{CDCl}_3$ ) spectra of compound **3n**

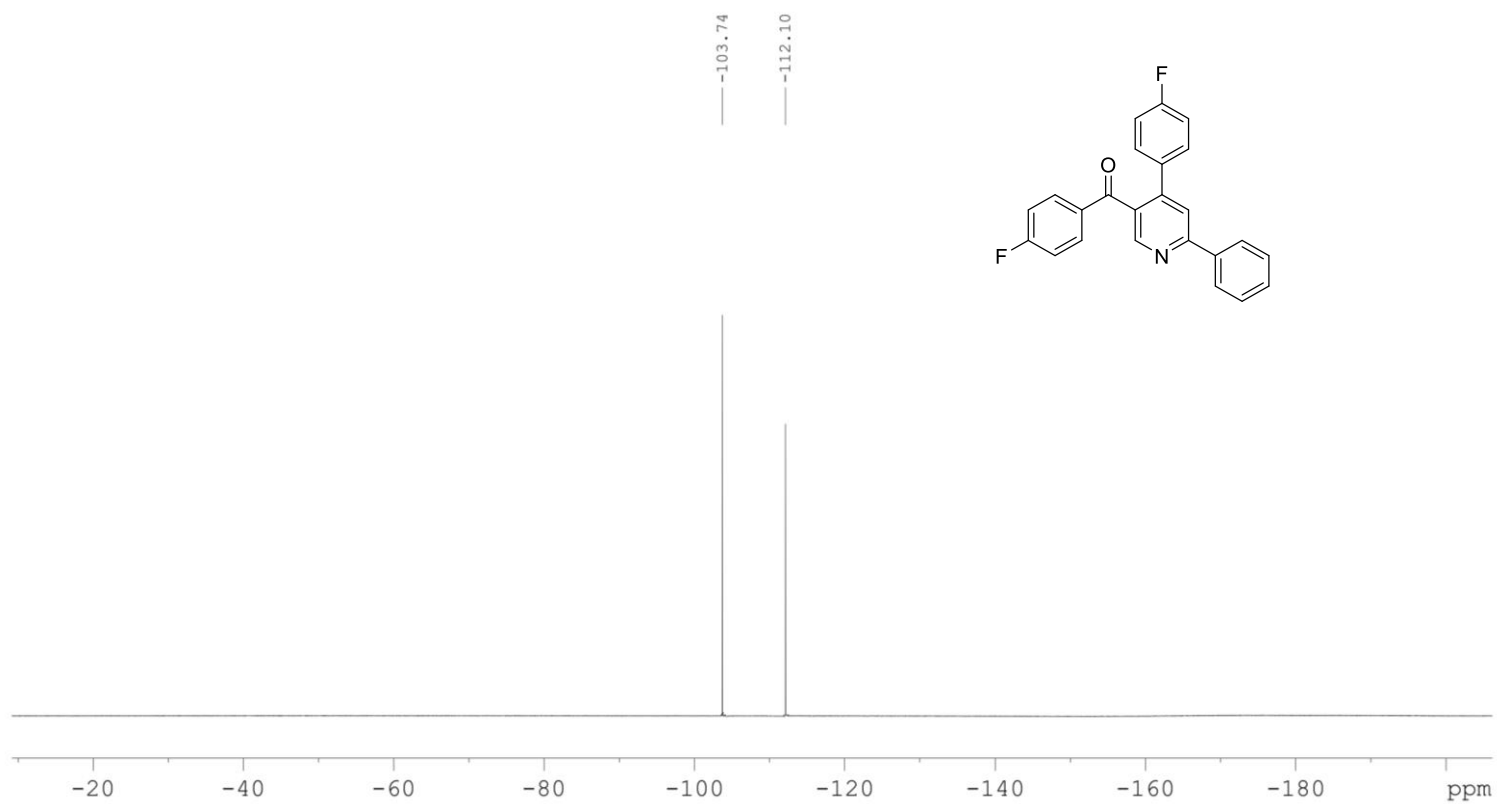

**Figure S35.**  $^{19}\text{F}$  NMR (470 MHz,  $\text{CDCl}_3$ ) spectra of compound **3n**

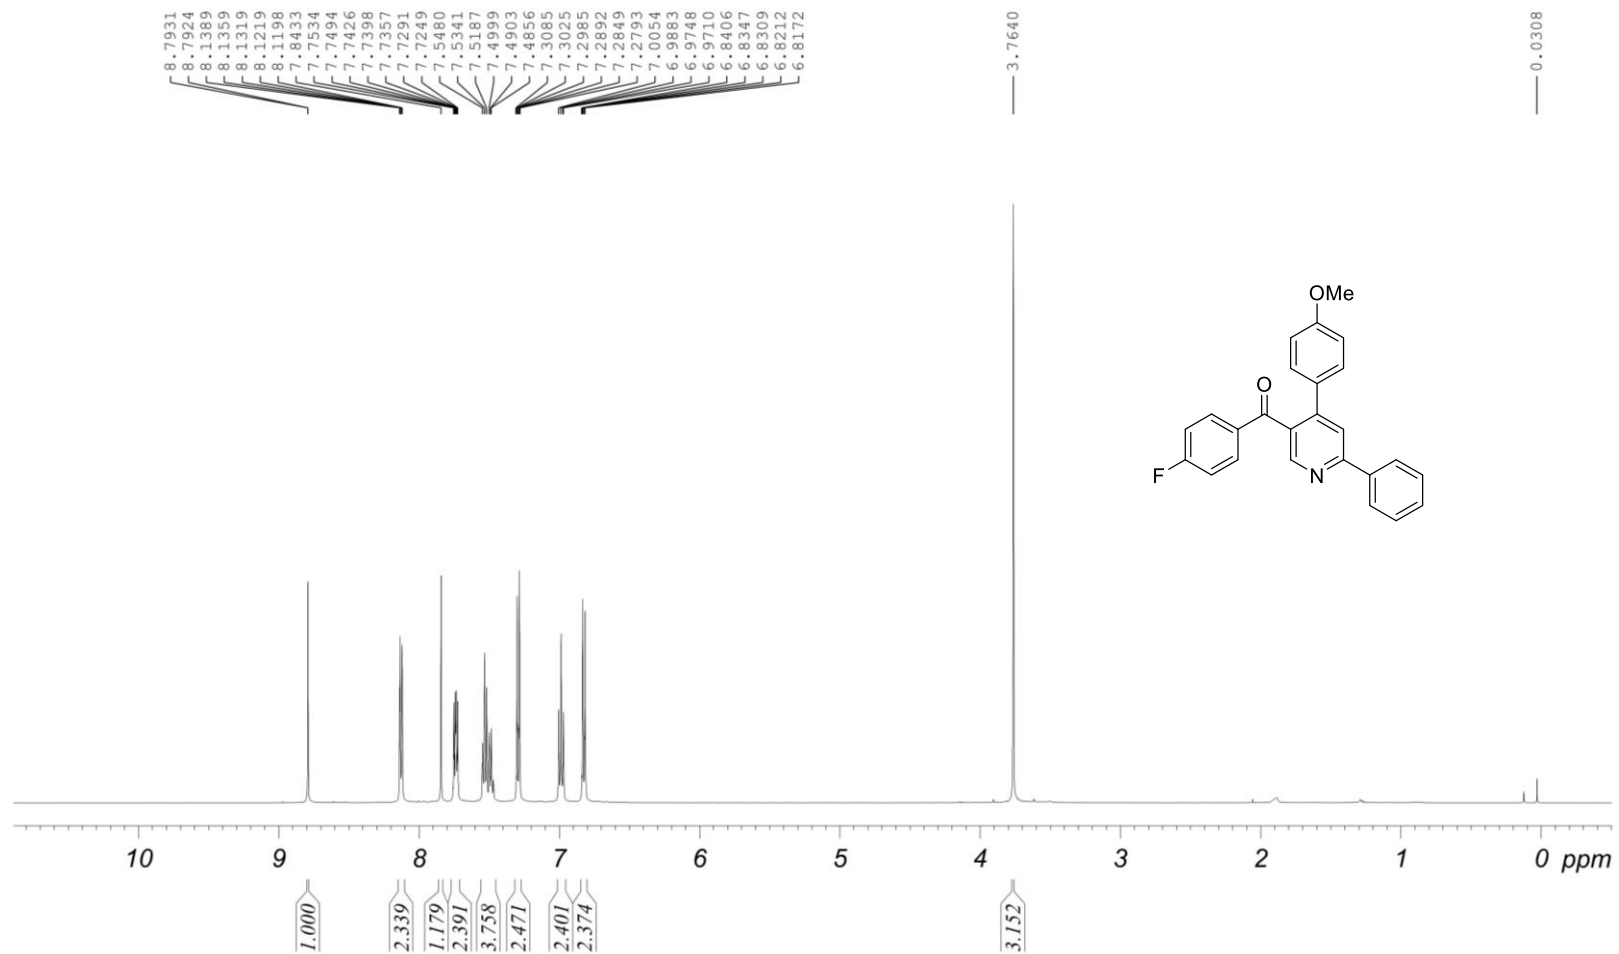

**Figure S36.** <sup>1</sup>H NMR (500 MHz, CDCl<sub>3</sub>) spectra of compound **3o**

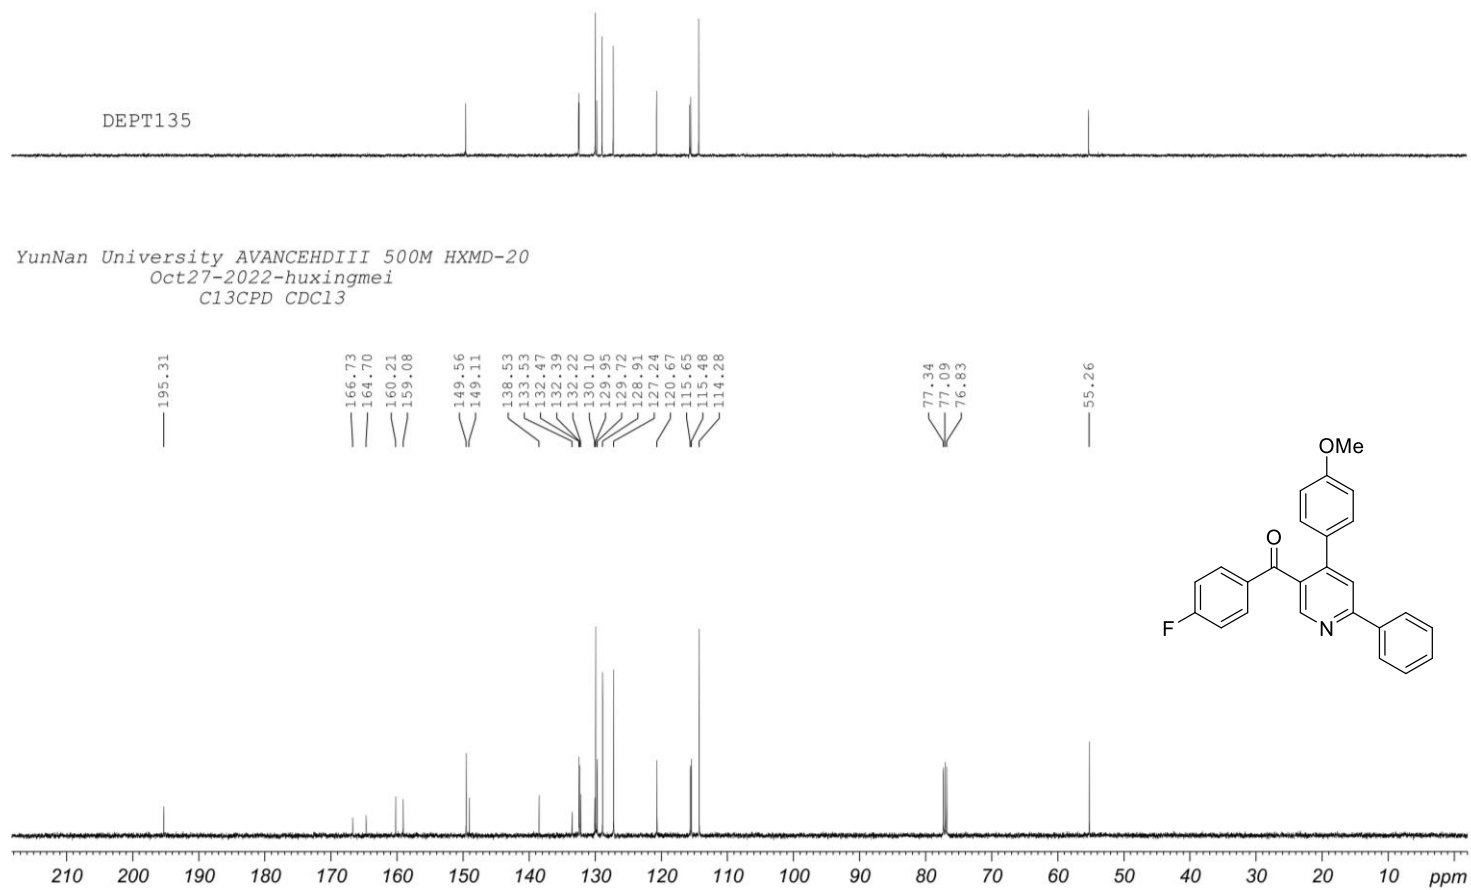

Figure S37.  $^{13}\text{C}$  NMR (125 MHz,  $\text{CDCl}_3$ ) spectra of compound **30**

YunNan University AVANCEHDIII 500M HXMD-20  
Oct27-2022-huxingmei  
F19CPD CDCl3

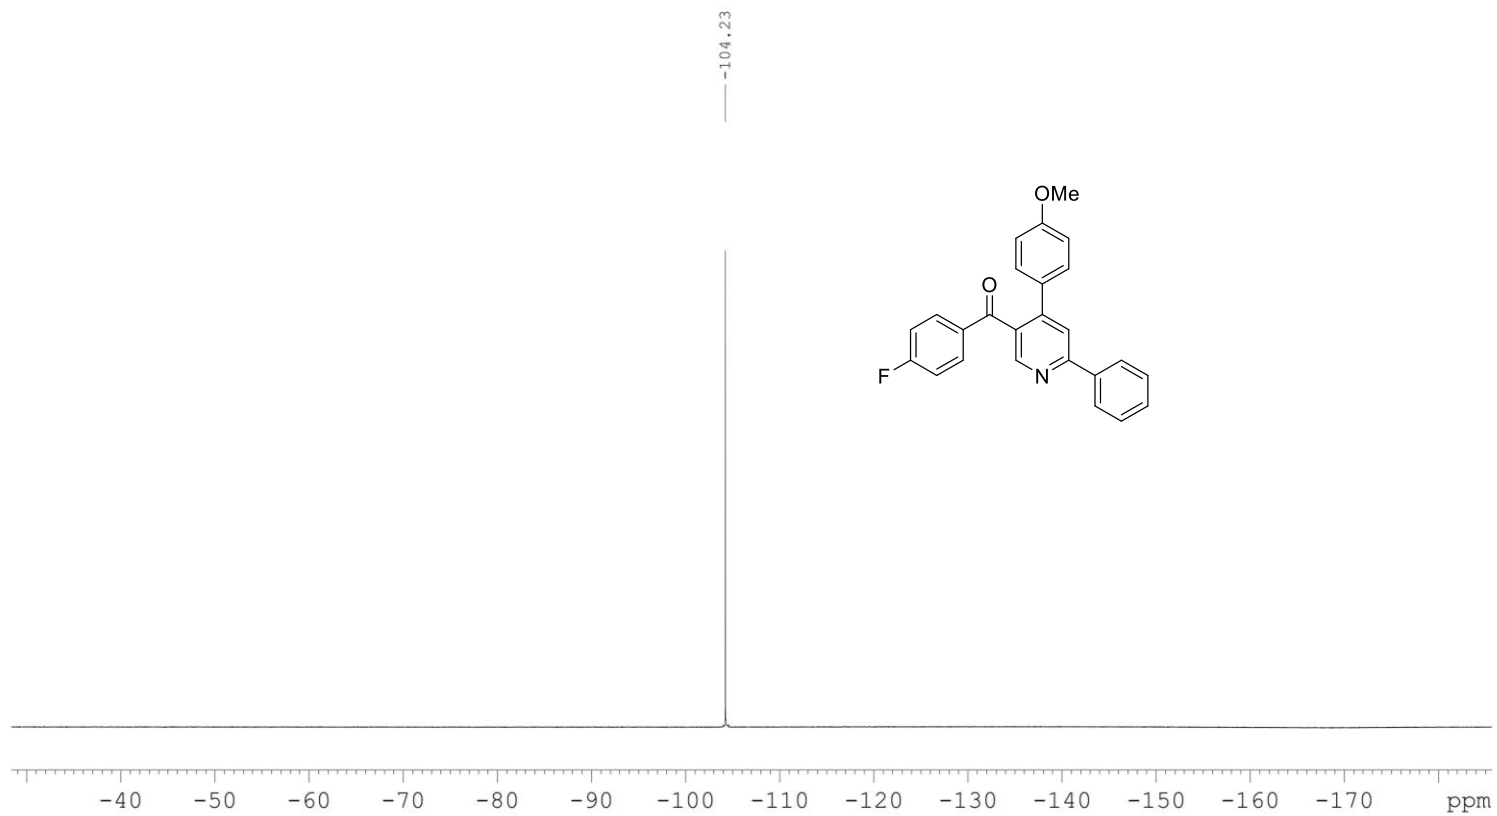

**Figure S38.**  $^{19}\text{F}$  NMR (470 MHz,  $\text{CDCl}_3$ ) spectra of compound **3o**

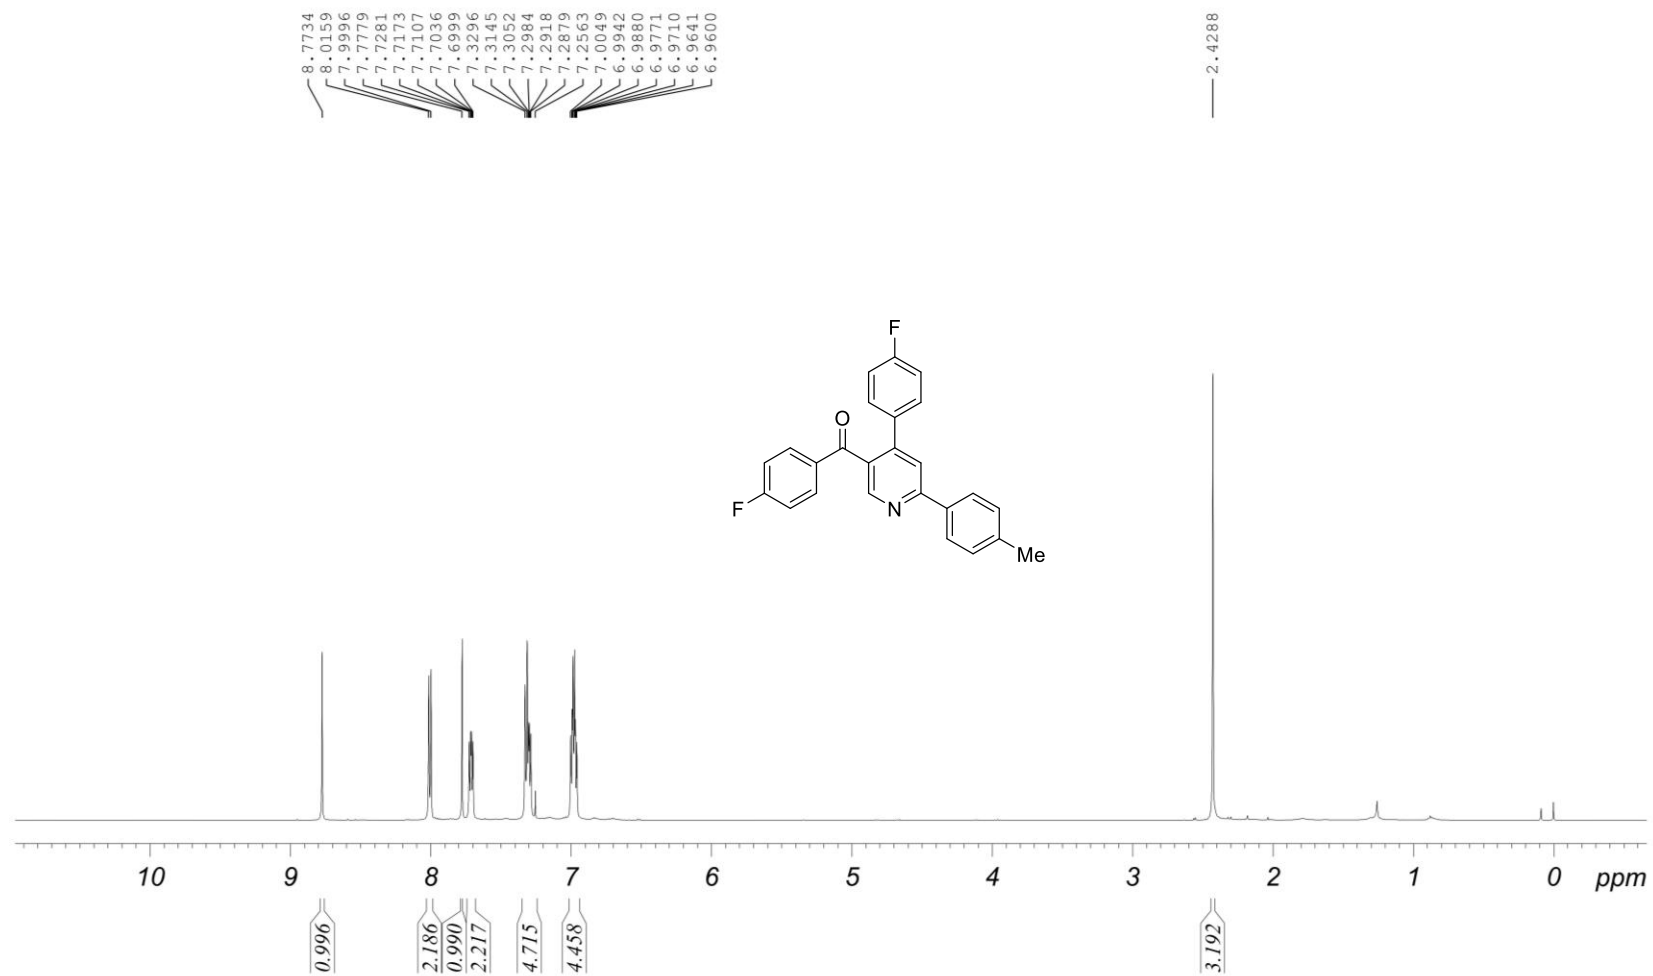

**Figure S39.** <sup>1</sup>H NMR (500 MHz, CDCl<sub>3</sub>) spectra of compound **3p**

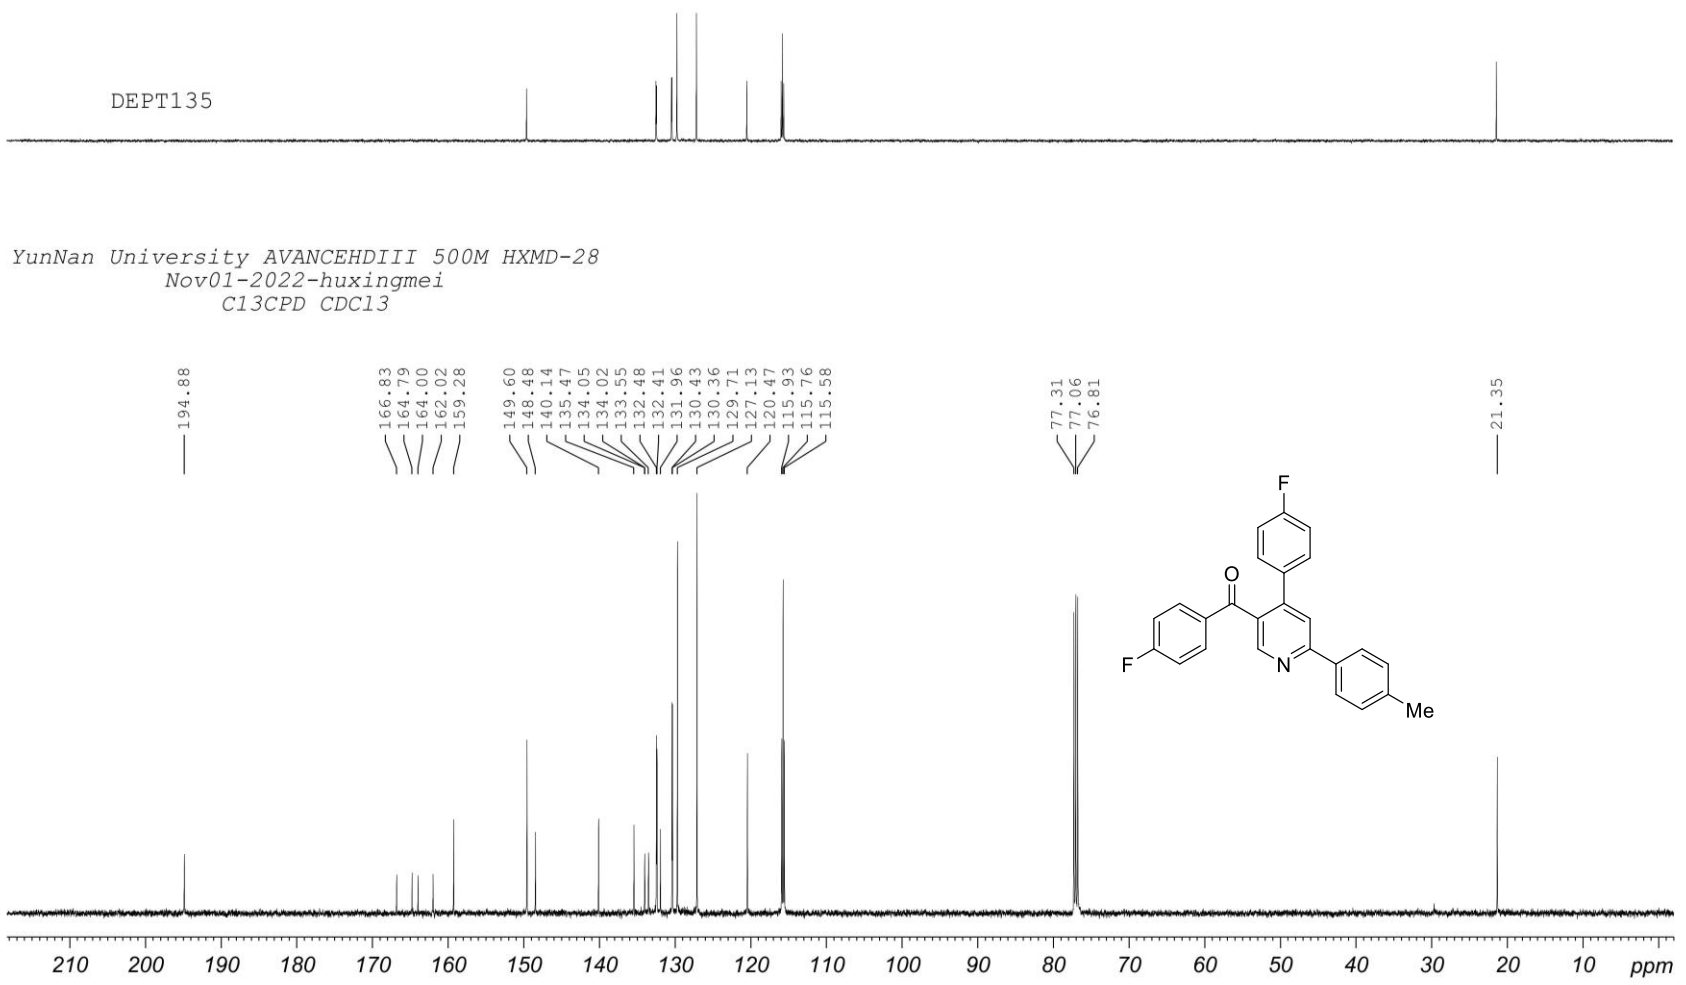

Figure S40.  $^{13}\text{C}$  NMR (125 MHz,  $\text{CDCl}_3$ ) spectra of compound **3p**

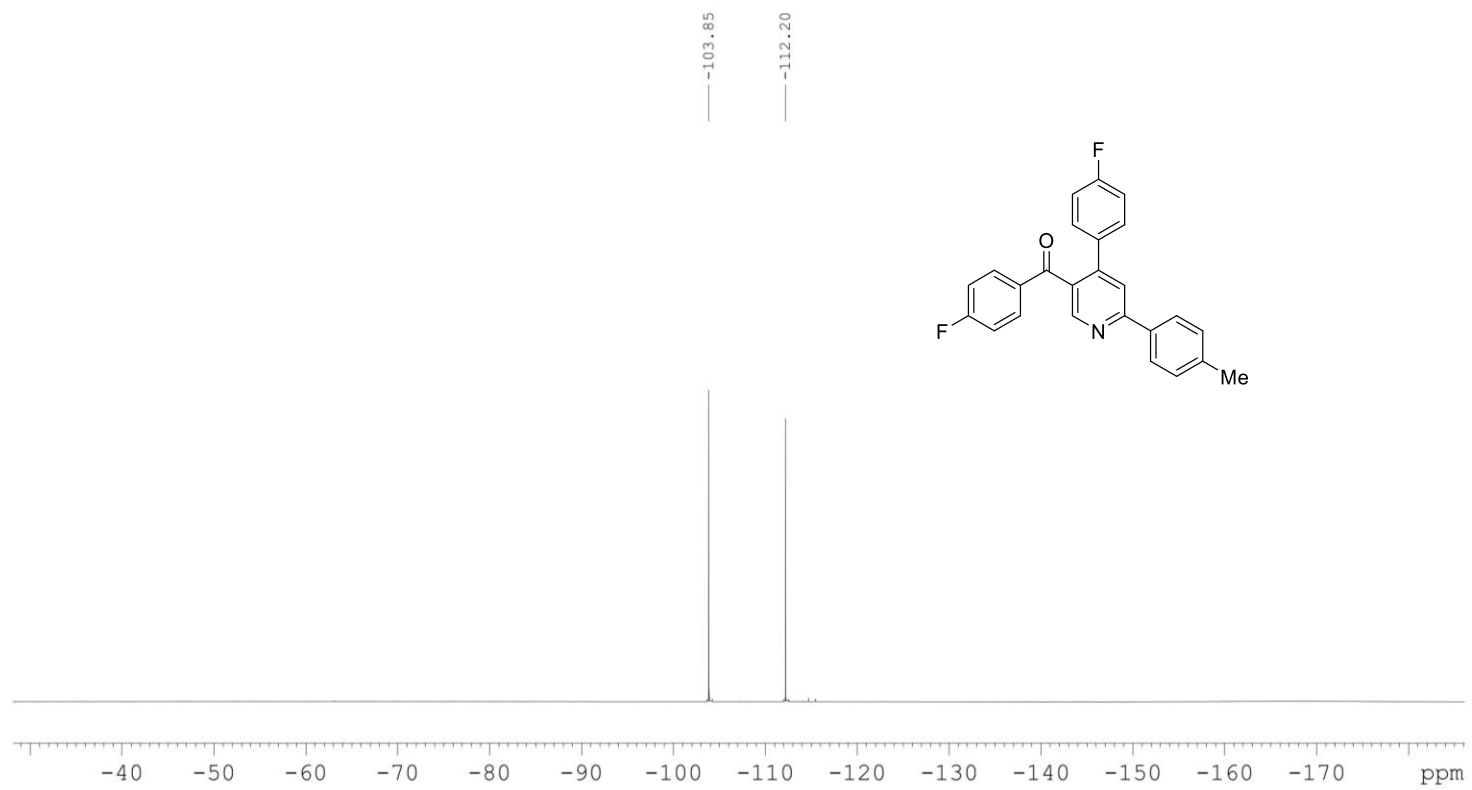

**Figure S41.**  $^{19}\text{F}$  NMR (470 MHz,  $\text{CDCl}_3$ ) spectra of compound **3p**



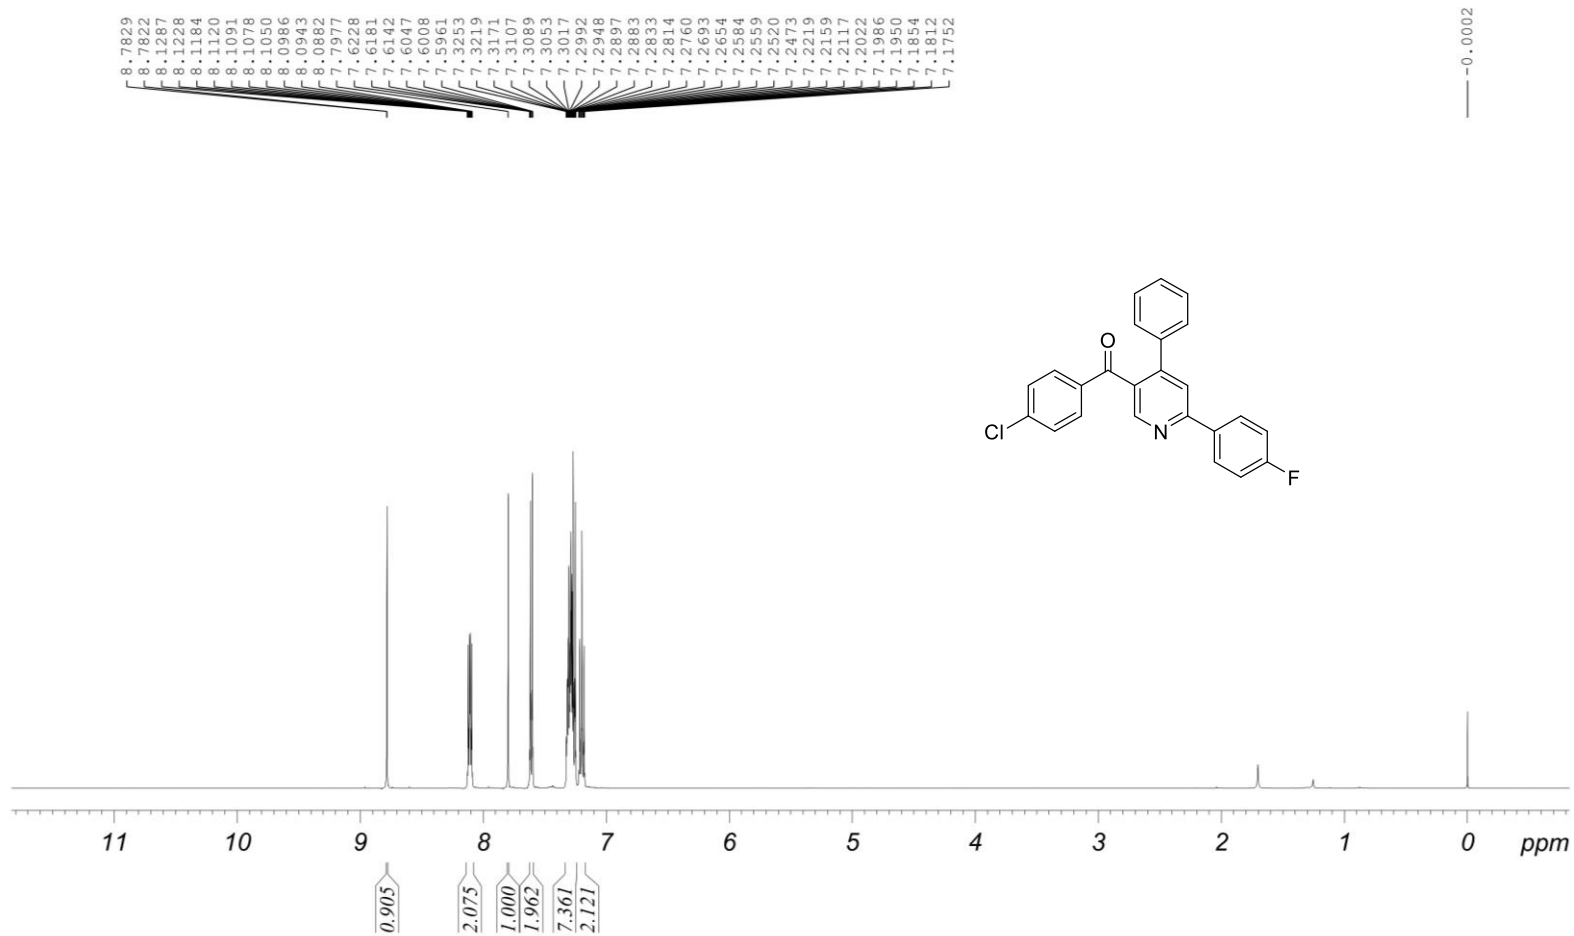

**Figure S42.** <sup>1</sup>H NMR (500 MHz, CDCl<sub>3</sub>) spectra of compound **3q**

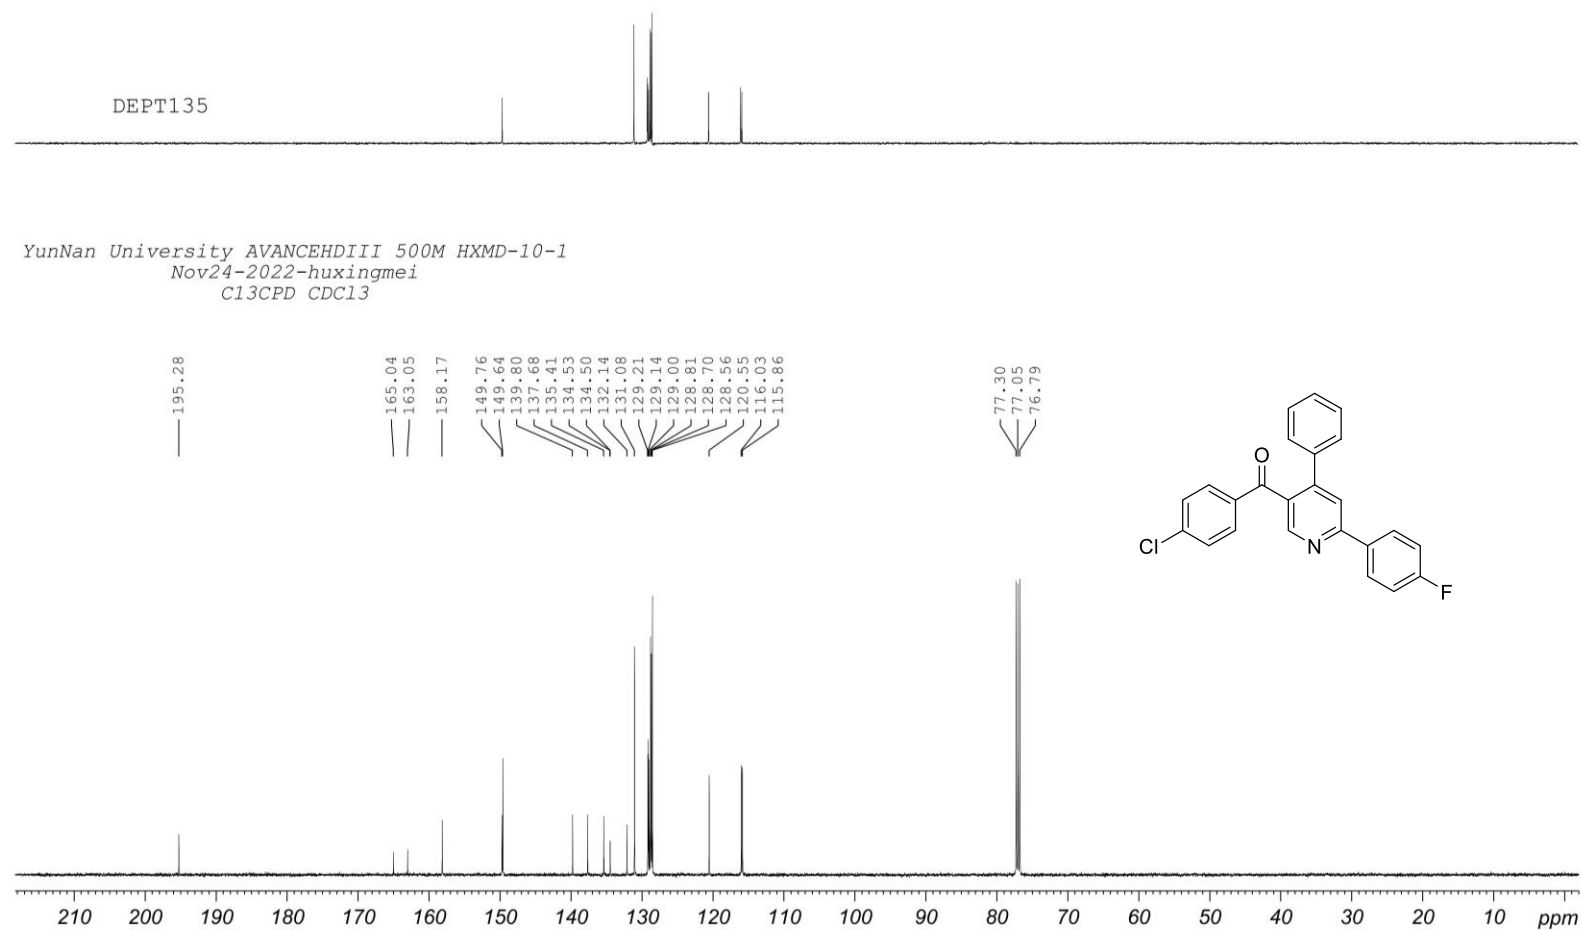

**Figure S43.**  $^{13}\text{C}$  NMR (125 MHz,  $\text{CDCl}_3$ ) spectra of compound **3q**

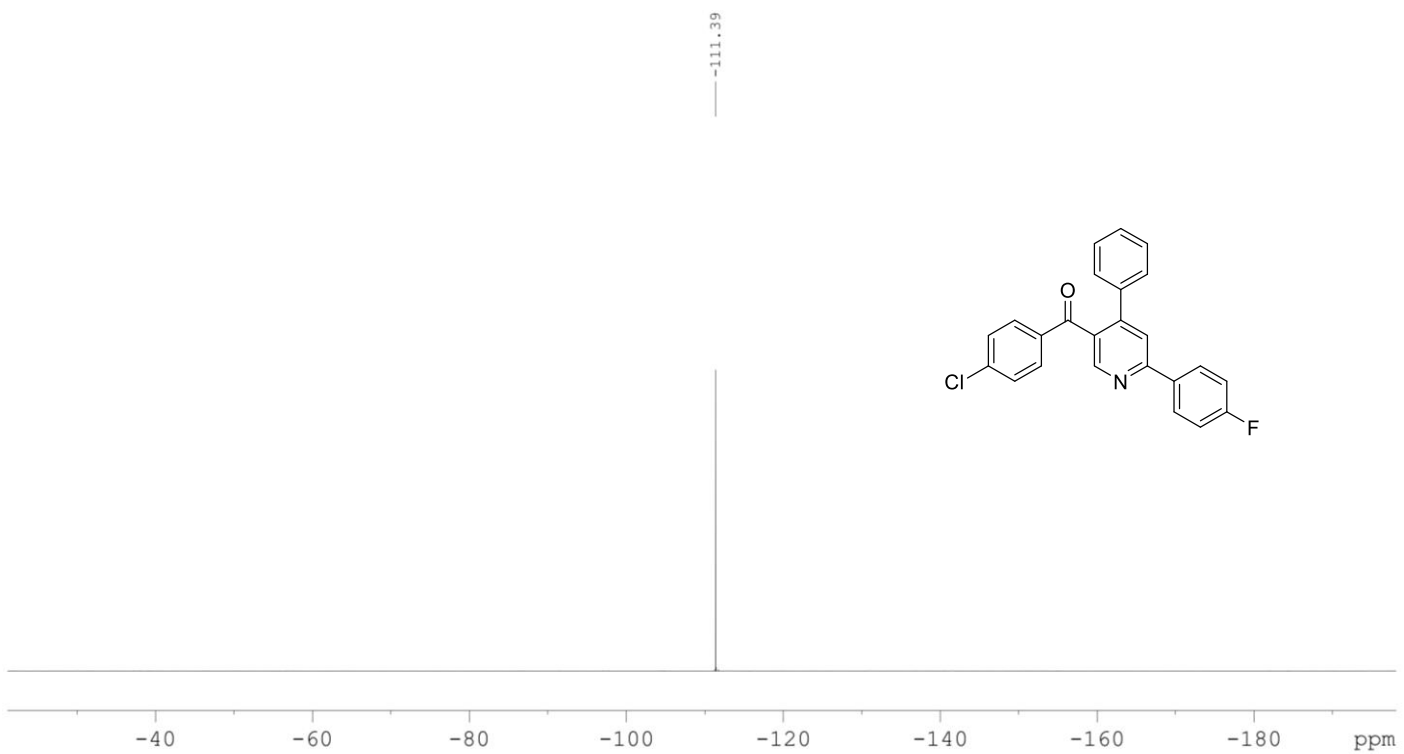

**Figure S44.**  $^{19}\text{F}$  NMR (470 MHz,  $\text{CDCl}_3$ ) spectra of compound **3q**

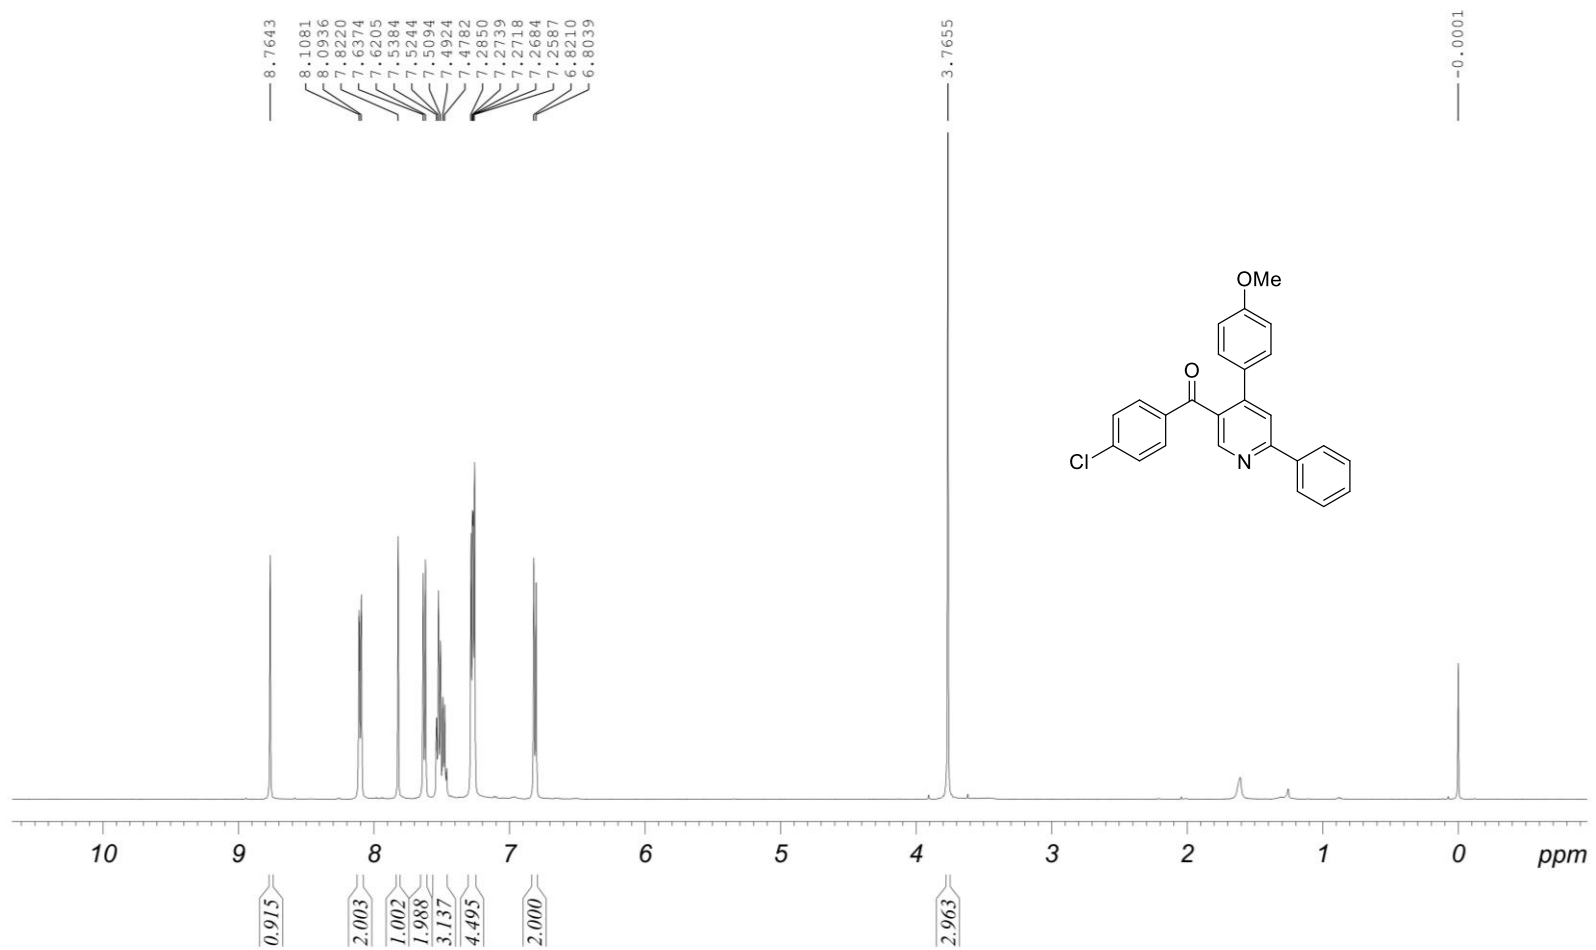

**Figure S45.**  $^1\text{H}$  NMR (500 MHz,  $\text{CDCl}_3$ ) spectra of compound **3r**

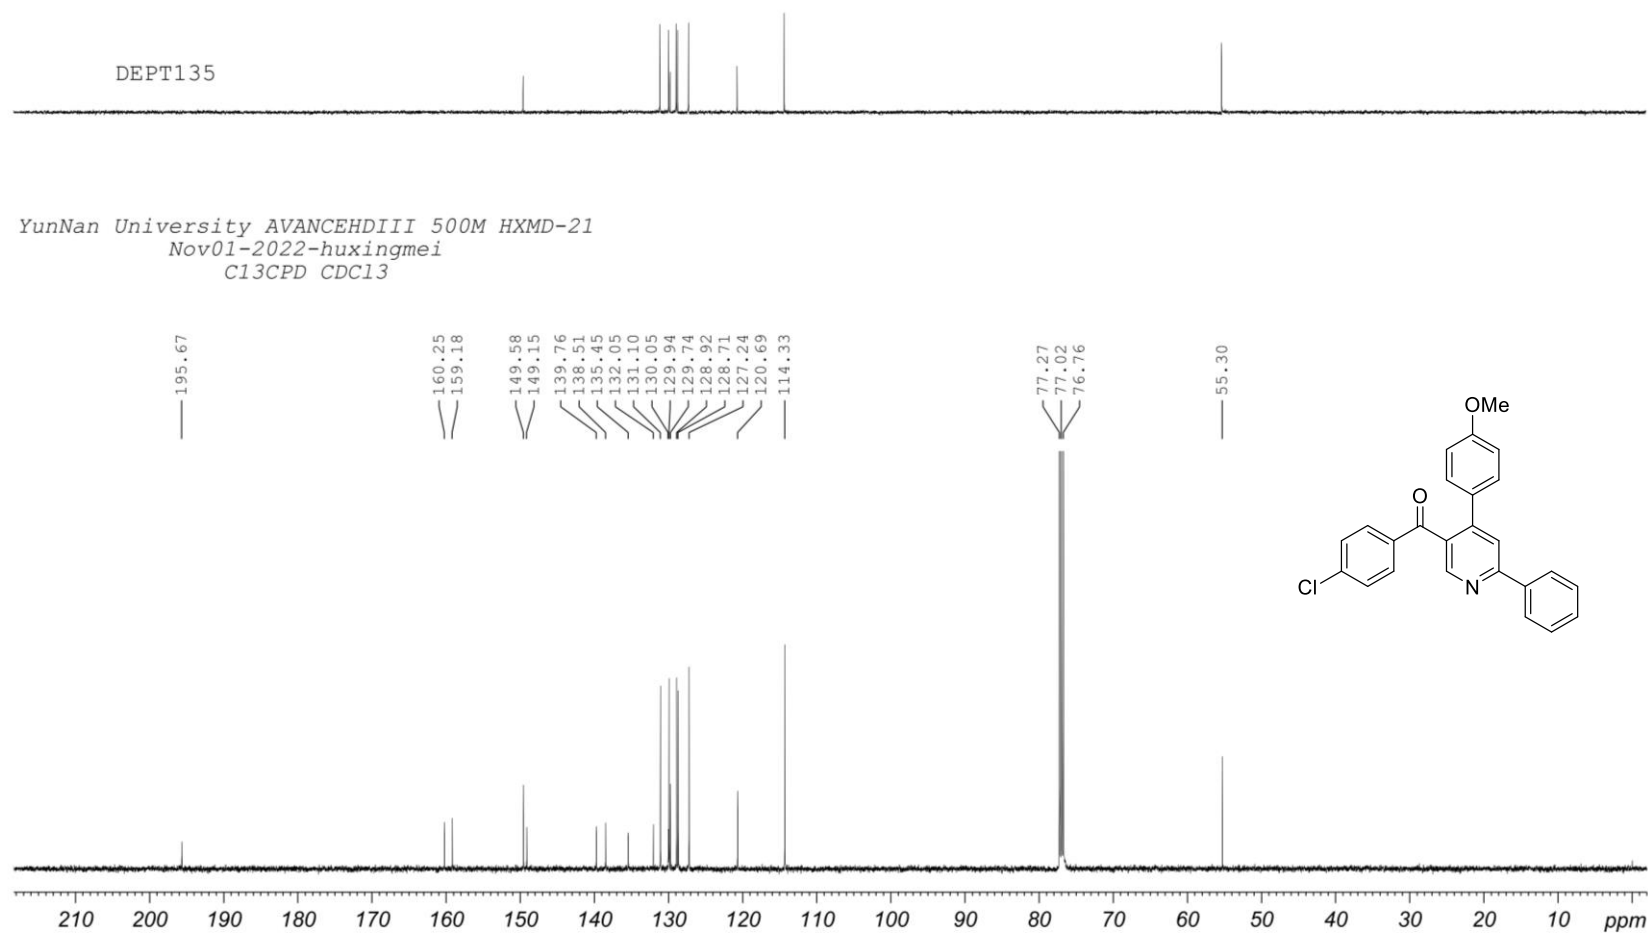

Figure S46.  $^{13}\text{C}$  NMR (125 MHz,  $\text{CDCl}_3$ ) spectra of compound **3r**

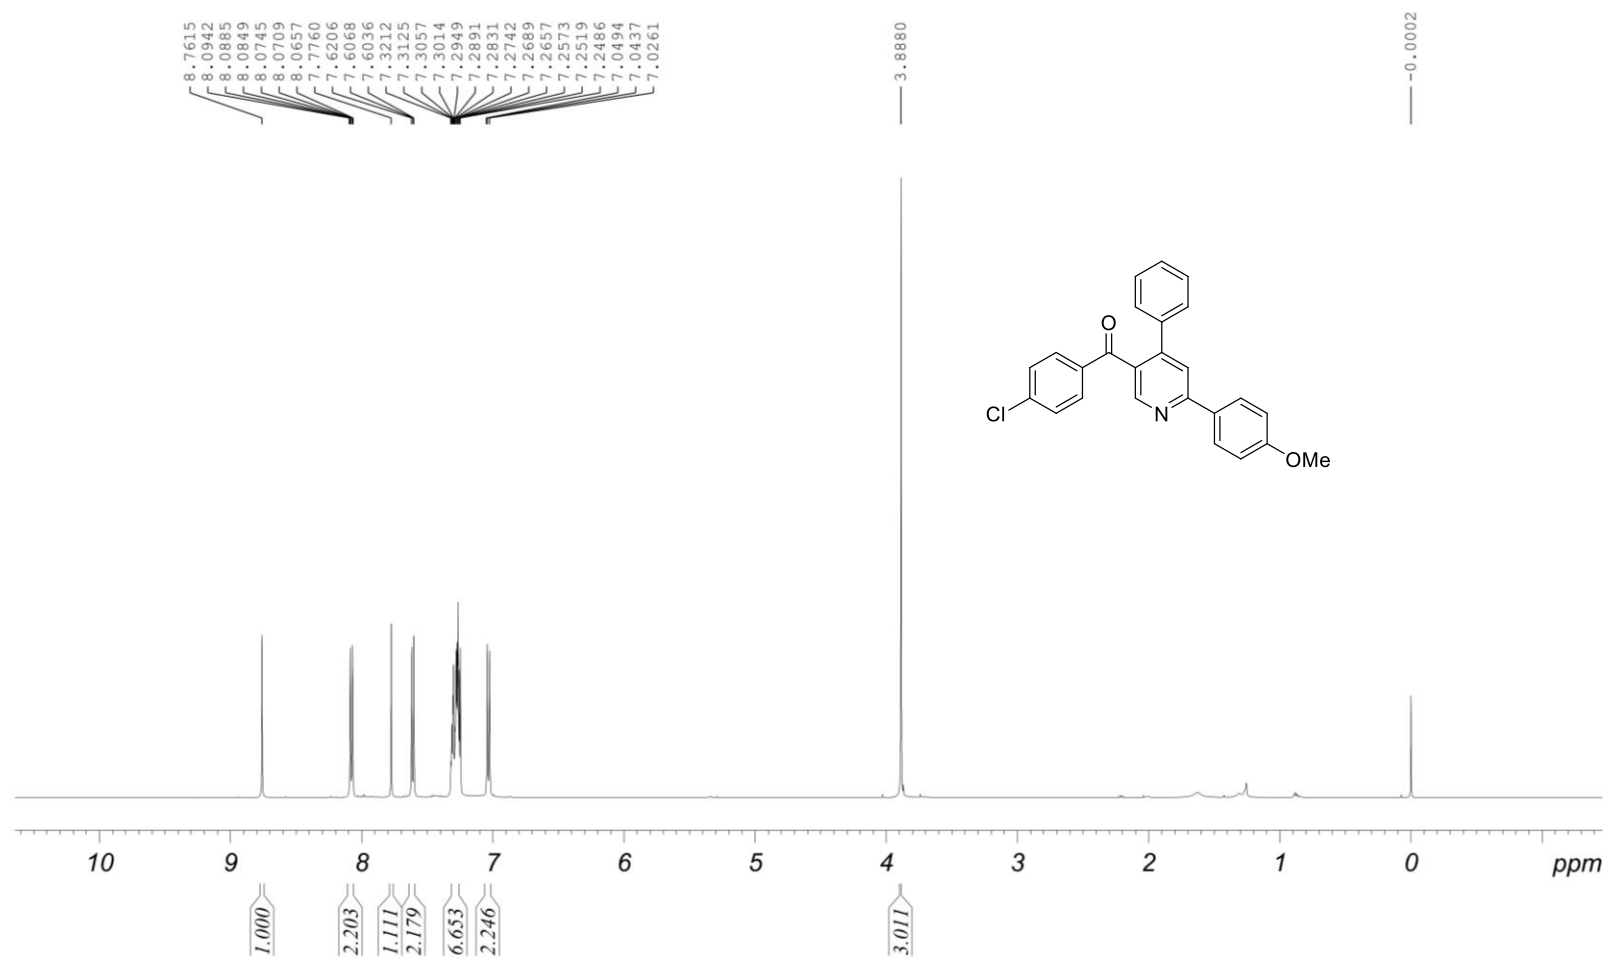

Figure S47. <sup>1</sup>H NMR (500 MHz, CDCl<sub>3</sub>) spectra of compound 3s

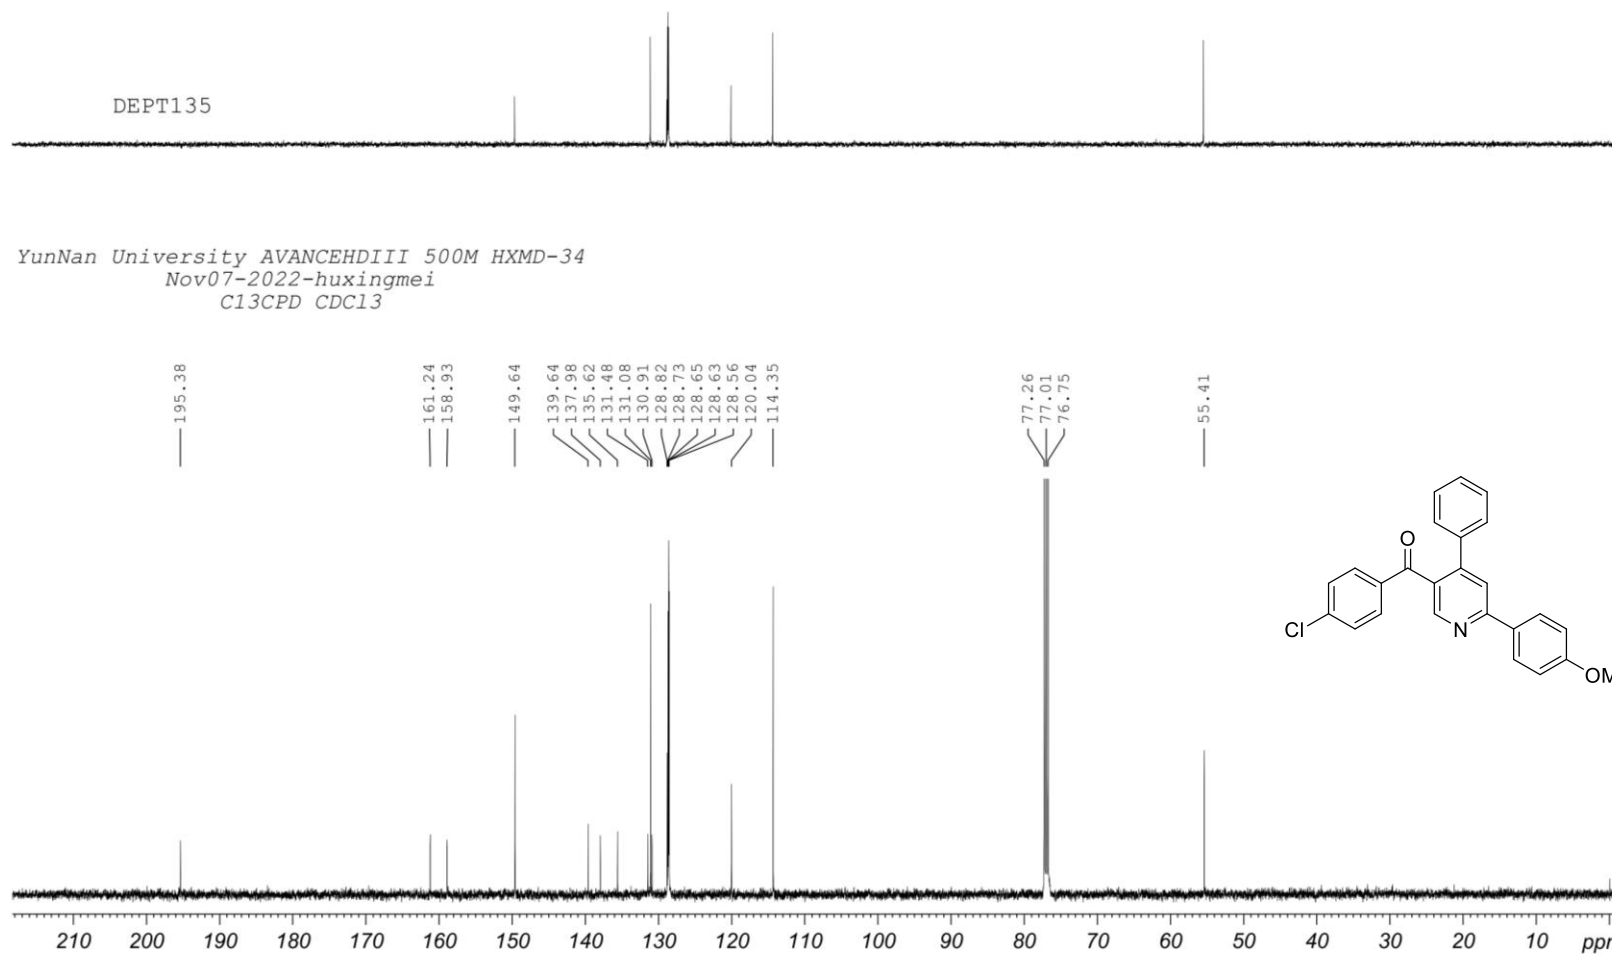

Figure S48.  $^{13}\text{C}$  NMR (125 MHz,  $\text{CDCl}_3$ ) spectra of compound **3s**

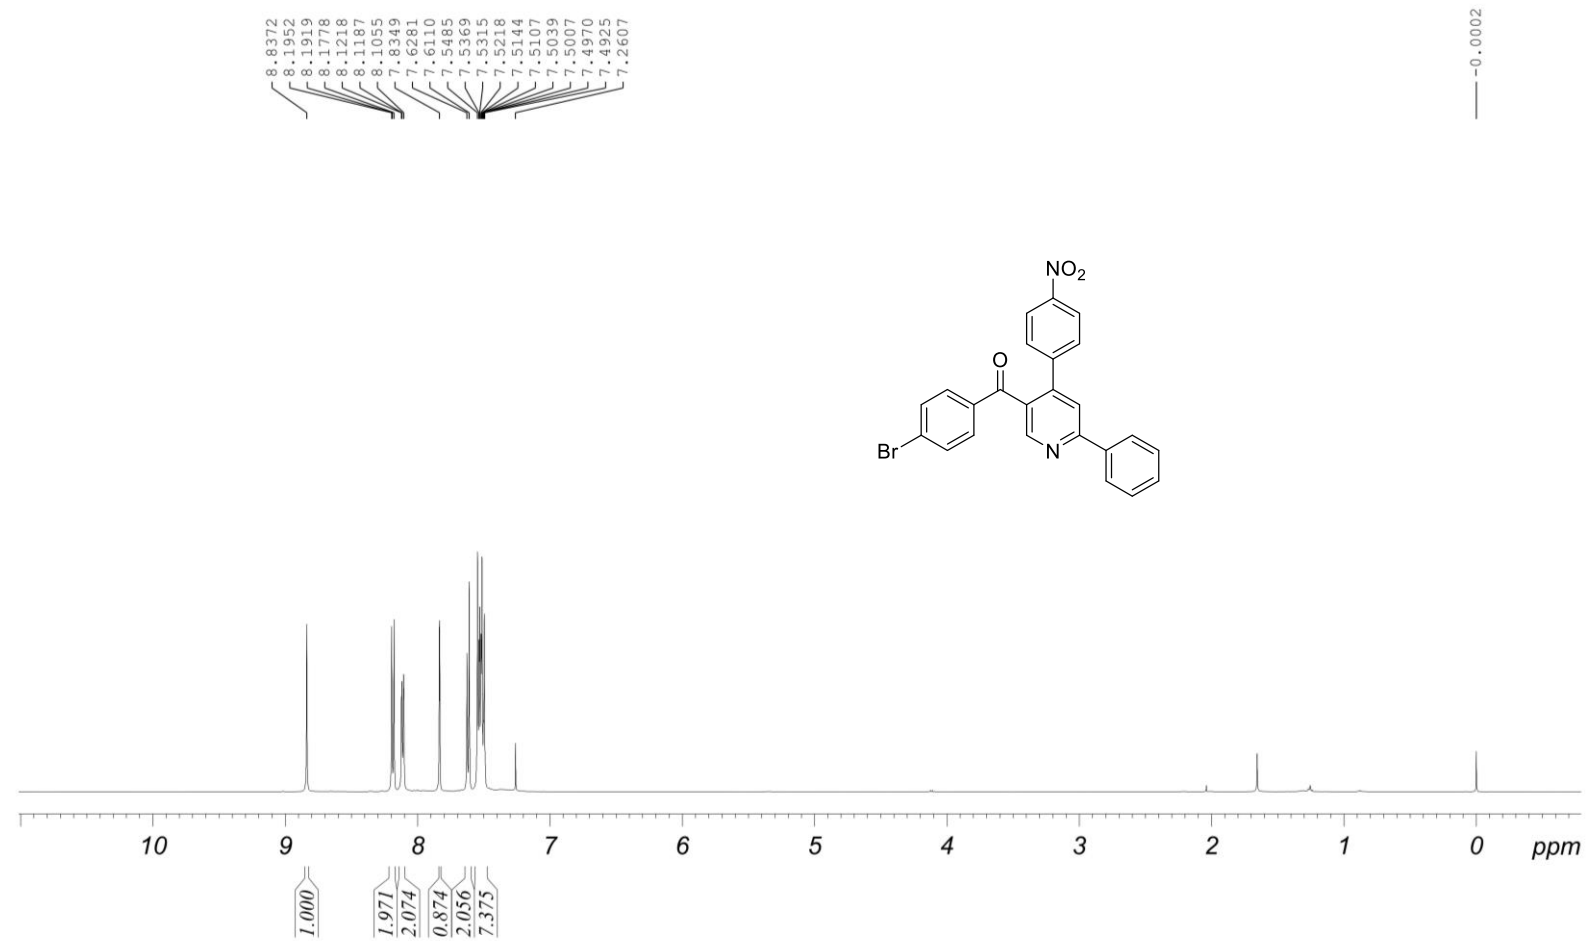

**Figure S49.** <sup>1</sup>H NMR (500 MHz, CDCl<sub>3</sub>) spectra of compound 3t



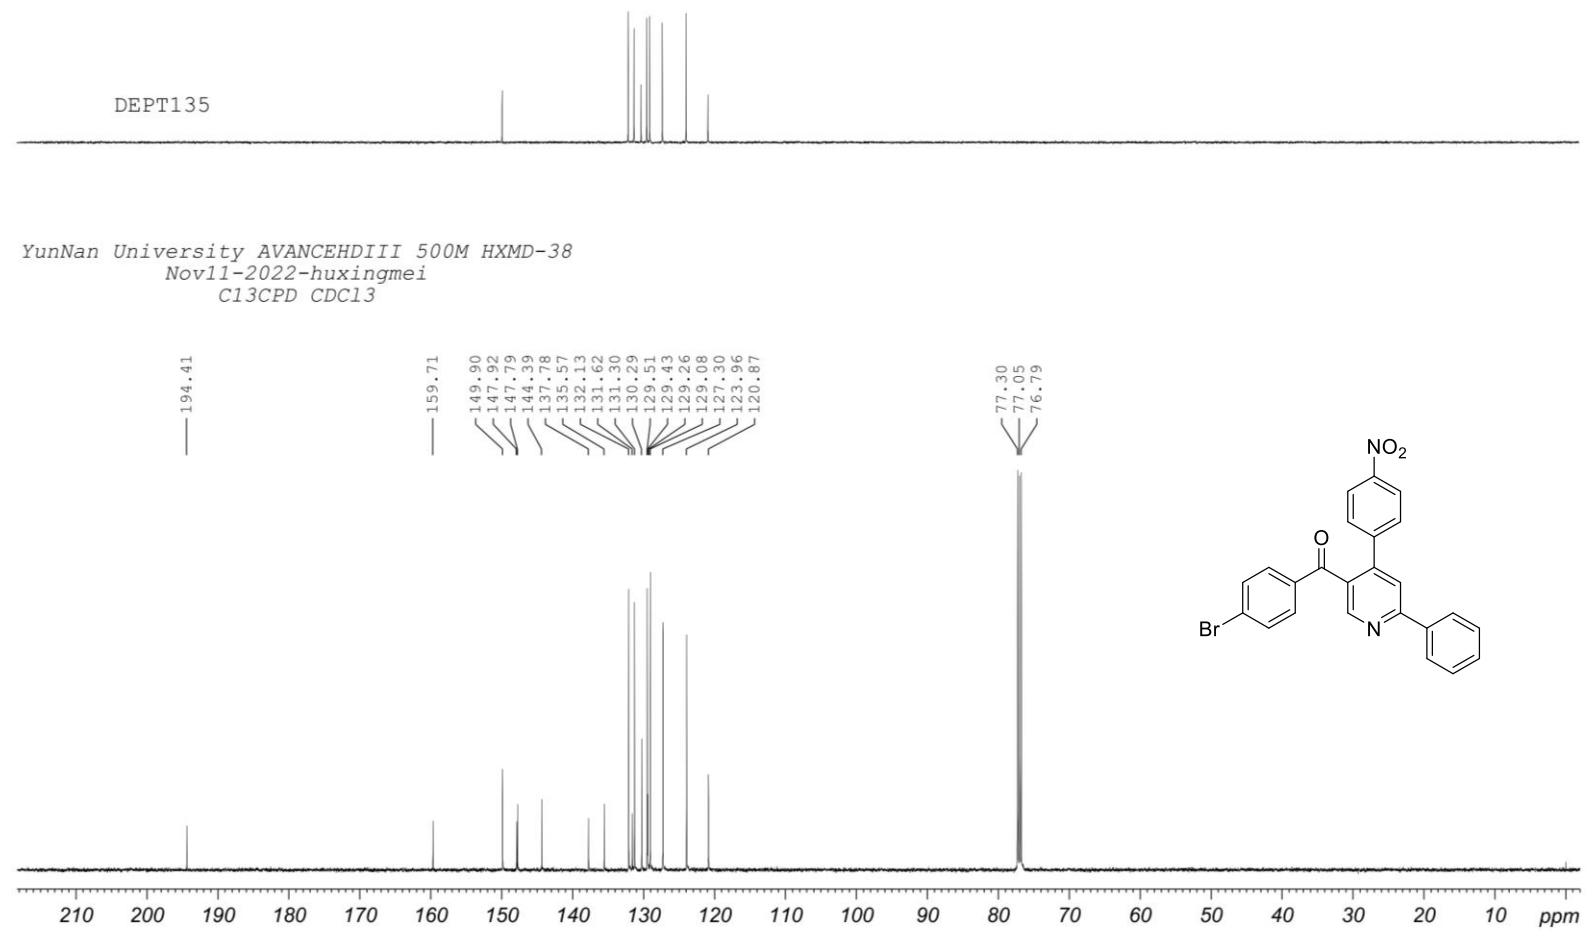

Figure S50.  $^{12}\text{C}$  NMR (125 MHz,  $\text{CDCl}_3$ ) spectra of compound 3t

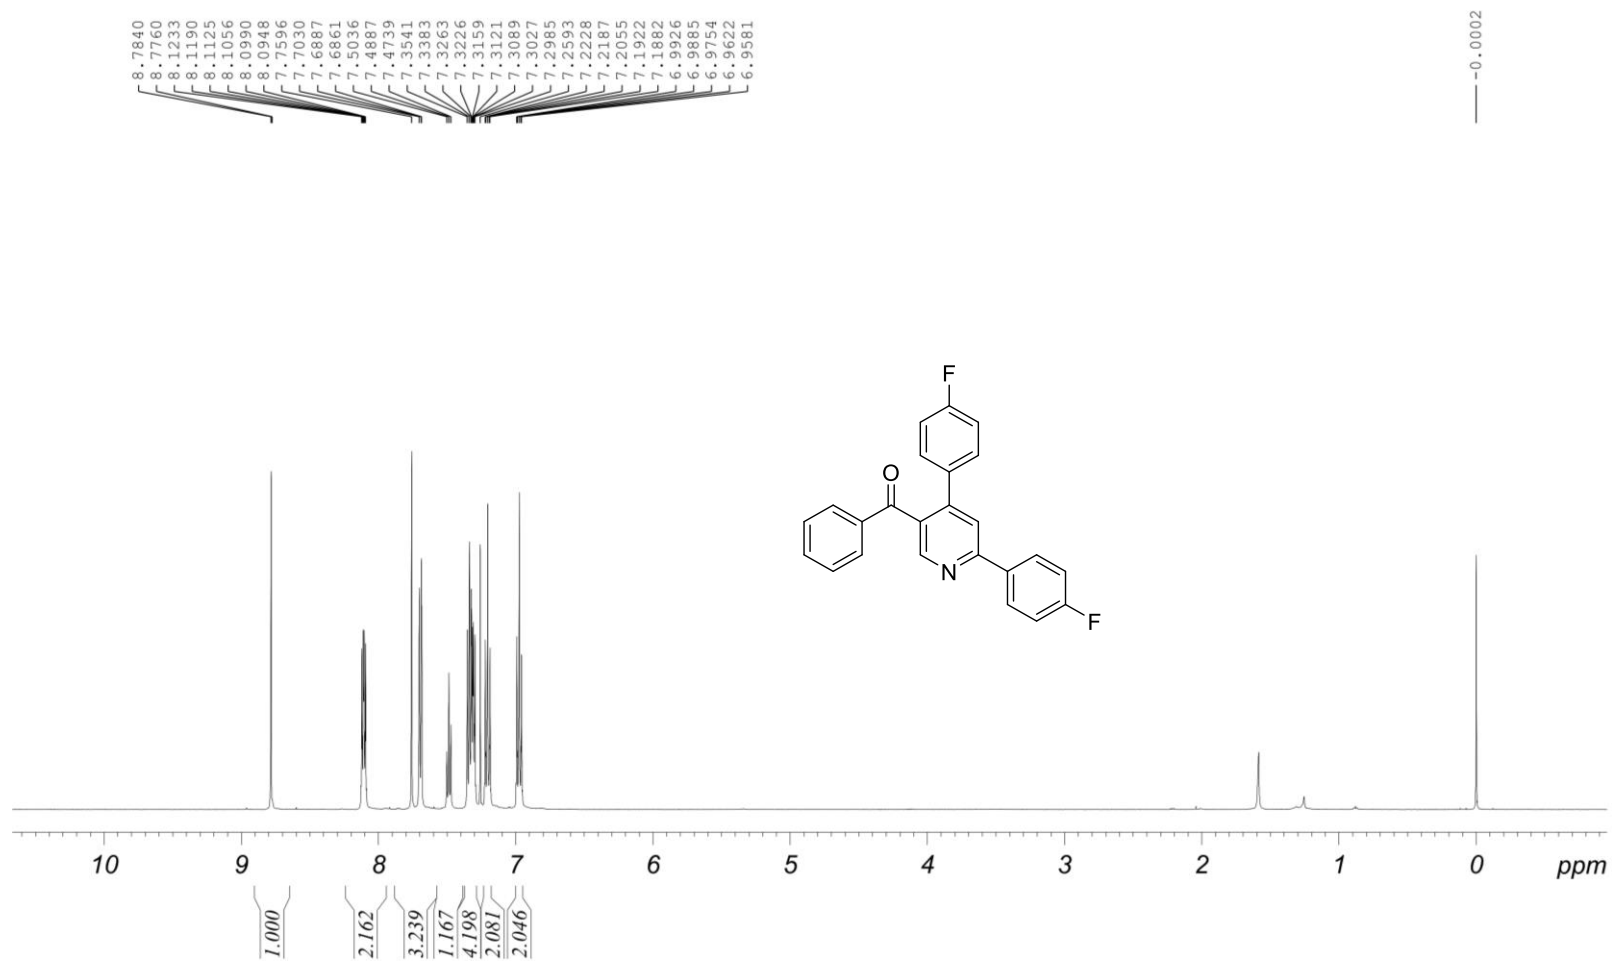

**Figure S51.**  $^1\text{H}$  NMR (500 MHz,  $\text{CDCl}_3$ ) spectra of compound **3u**

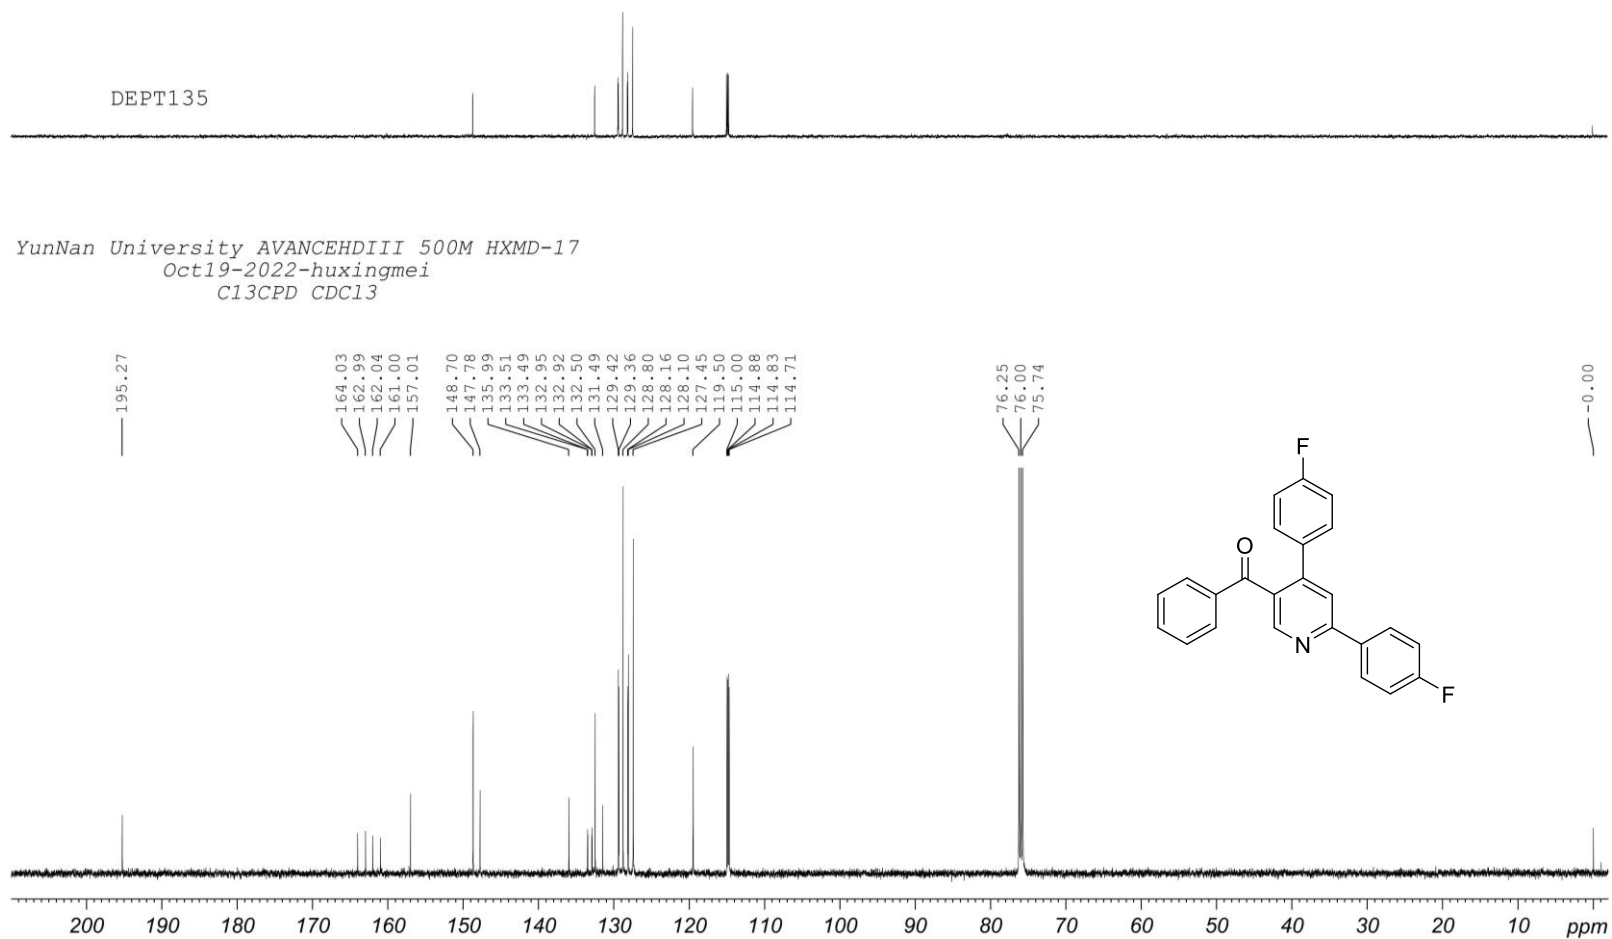

**Figure S52.**  $^{13}\text{C}$  NMR (125 MHz,  $\text{CDCl}_3$ ) spectra of compound **3u**

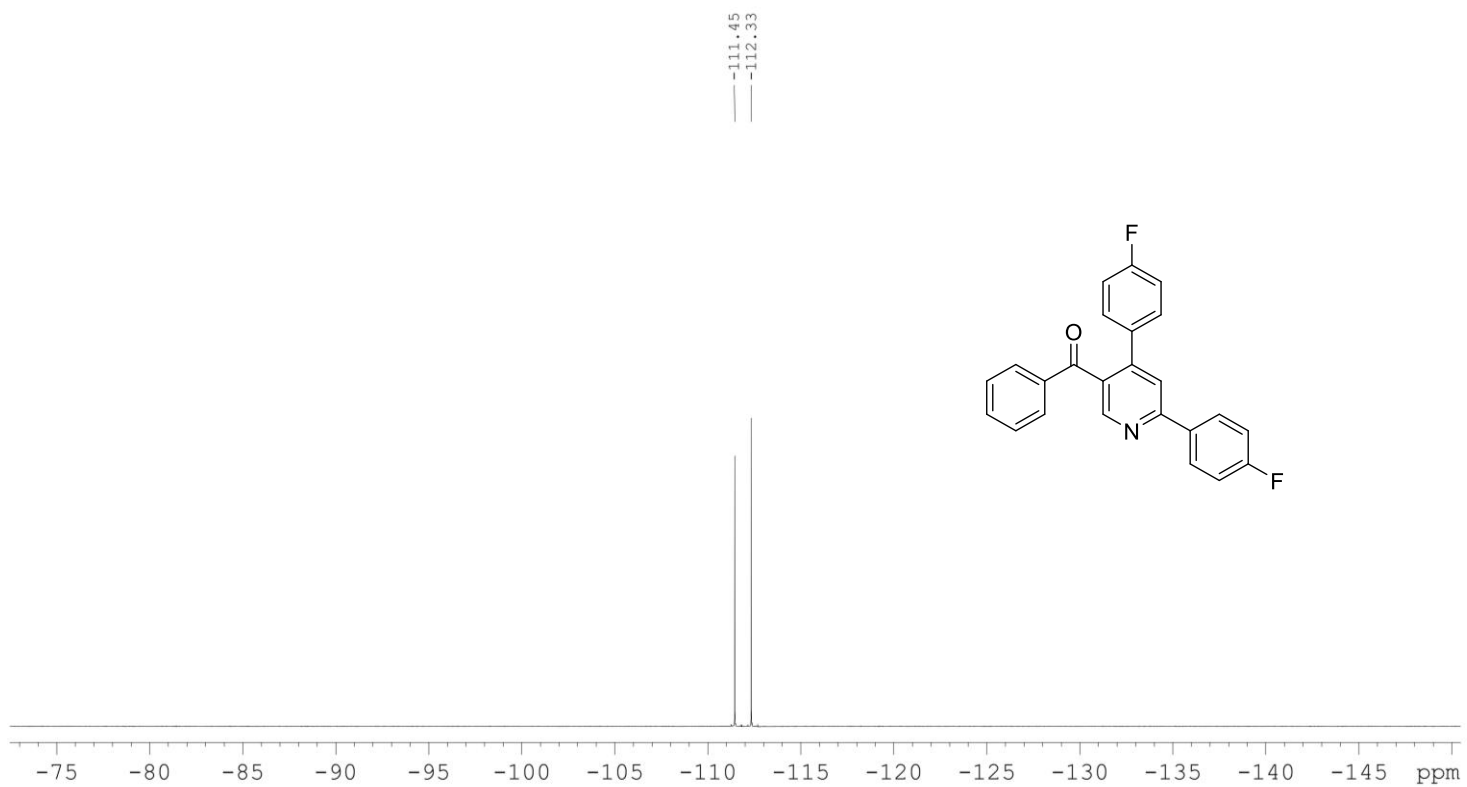

**Figure S53.**  $^{19}\text{F}$  NMR (470 MHz,  $\text{CDCl}_3$ ) spectra of compound **3u**

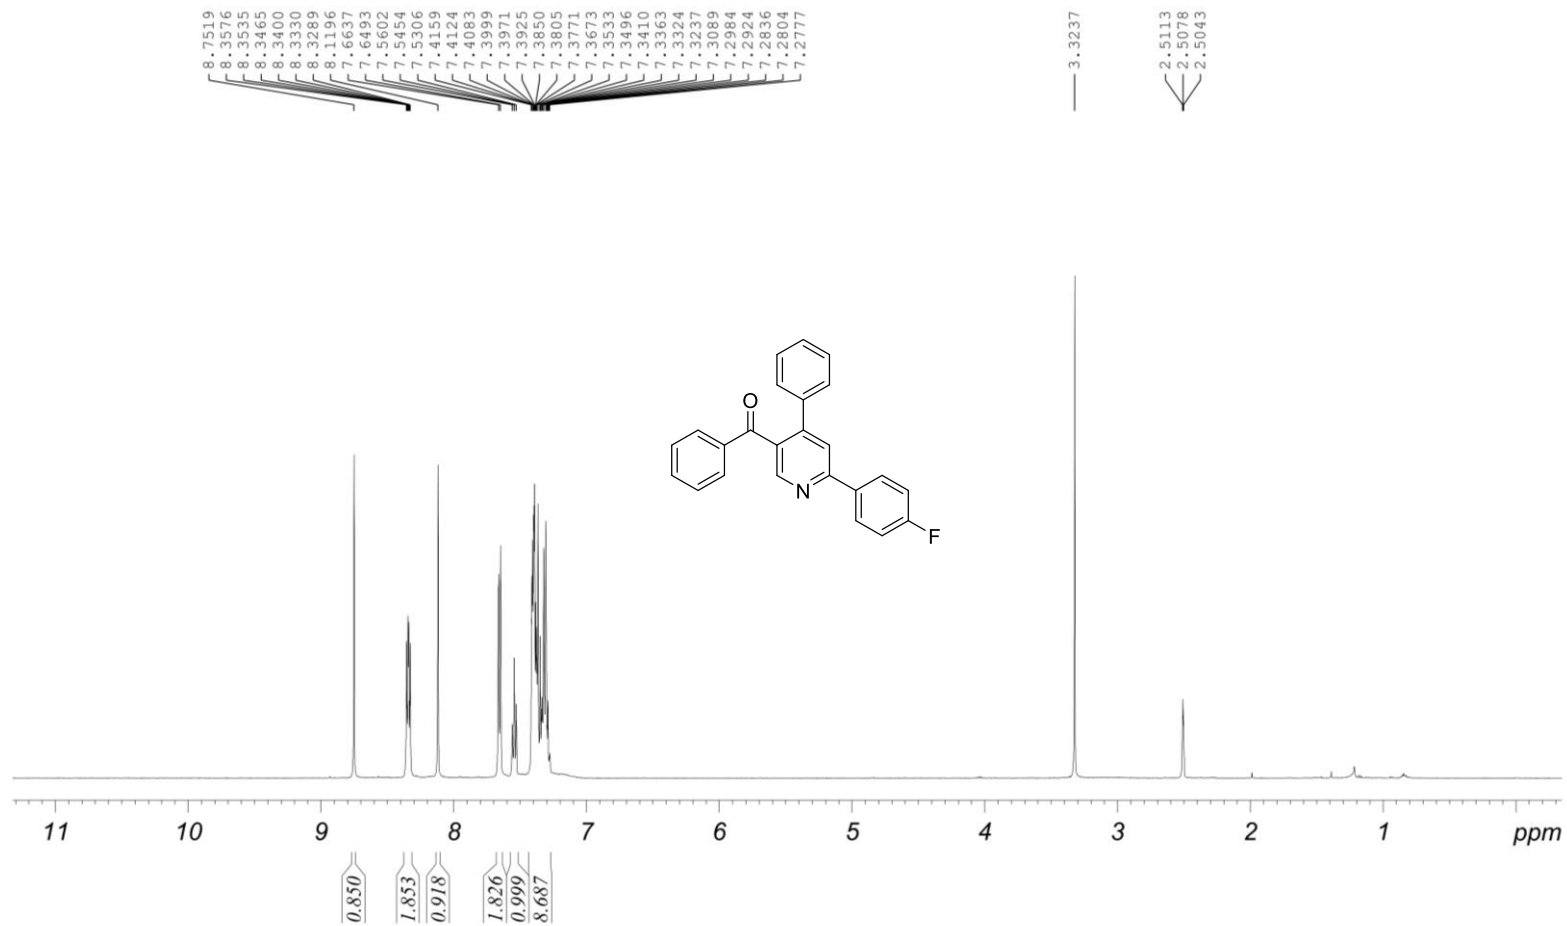

**Figure S54.** <sup>1</sup>H NMR (500 MHz, DMSO-*d*<sub>6</sub>) spectra of compound 3v

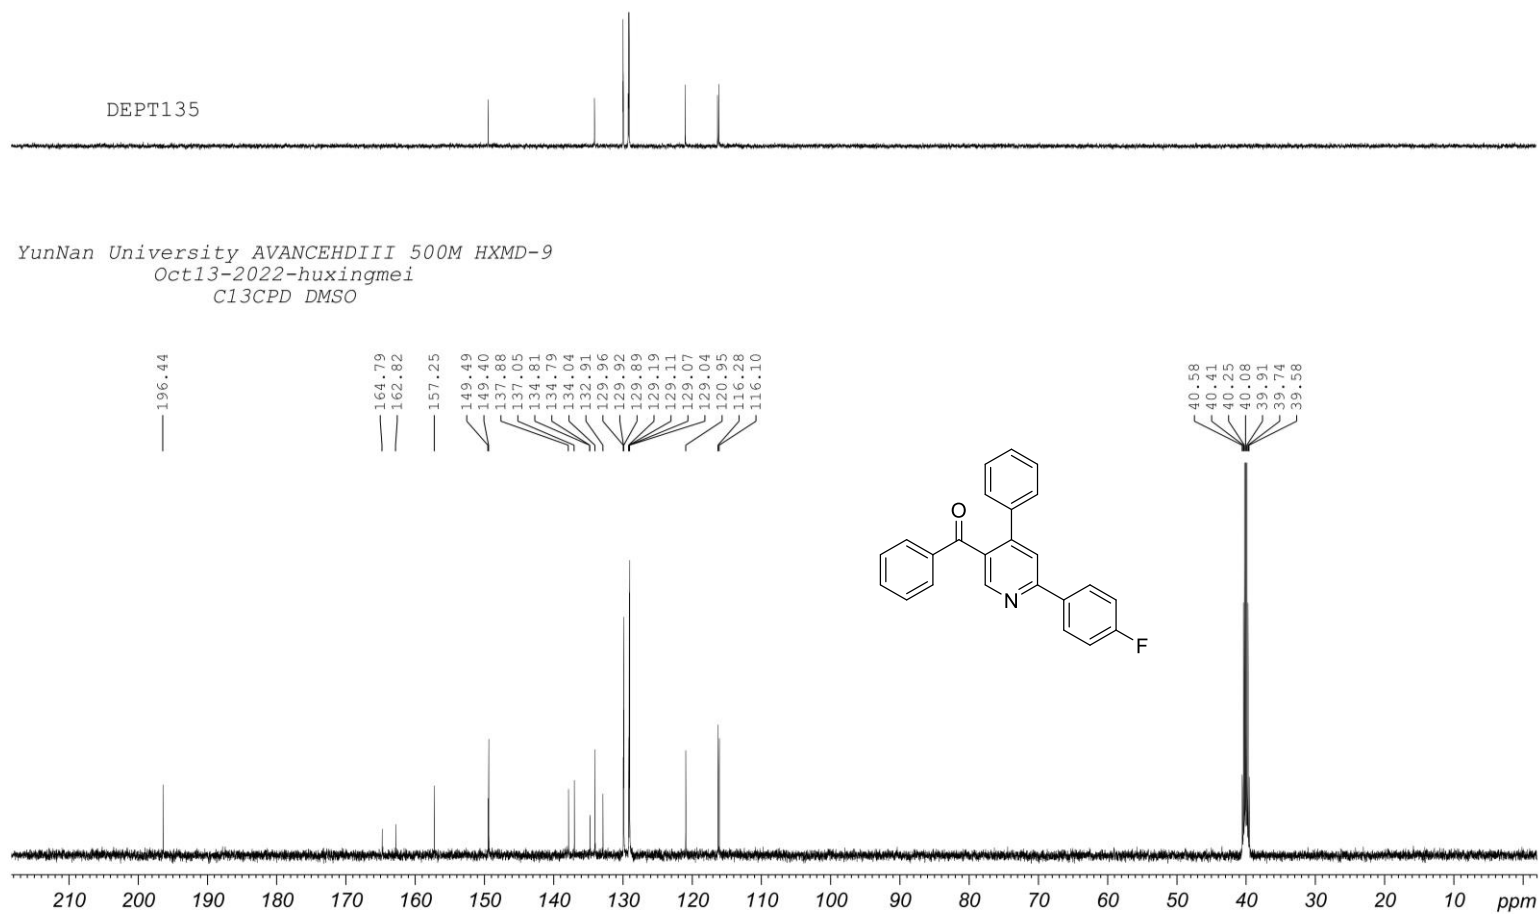

Figure S55.  $^{13}\text{C}$  NMR (125 MHz,  $\text{DMSO-}d_6$ ) spectra of compound 3v

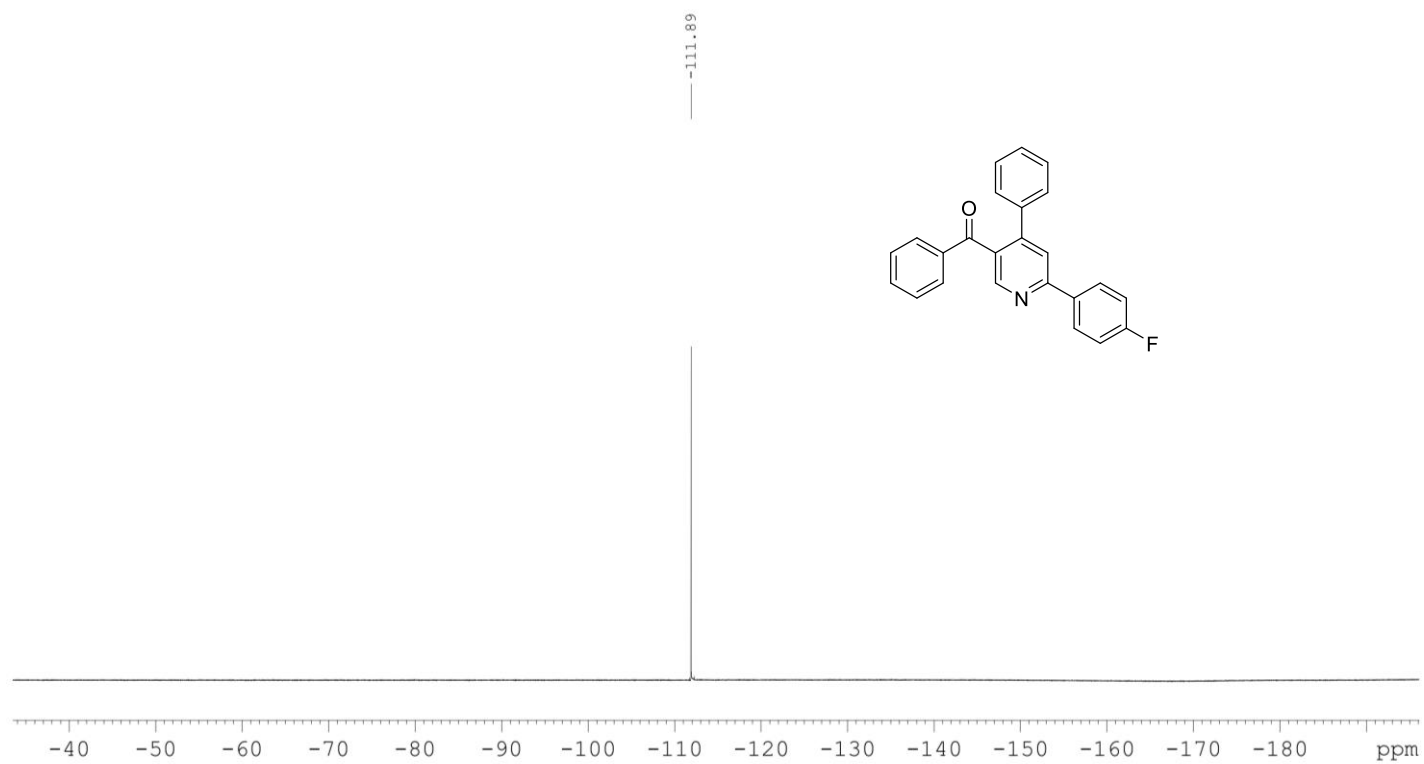

**Figure S56.**  $^{19}\text{F}$  NMR (470 MHz,  $\text{DMSO-}d_6$ ) spectra of compound **3v**

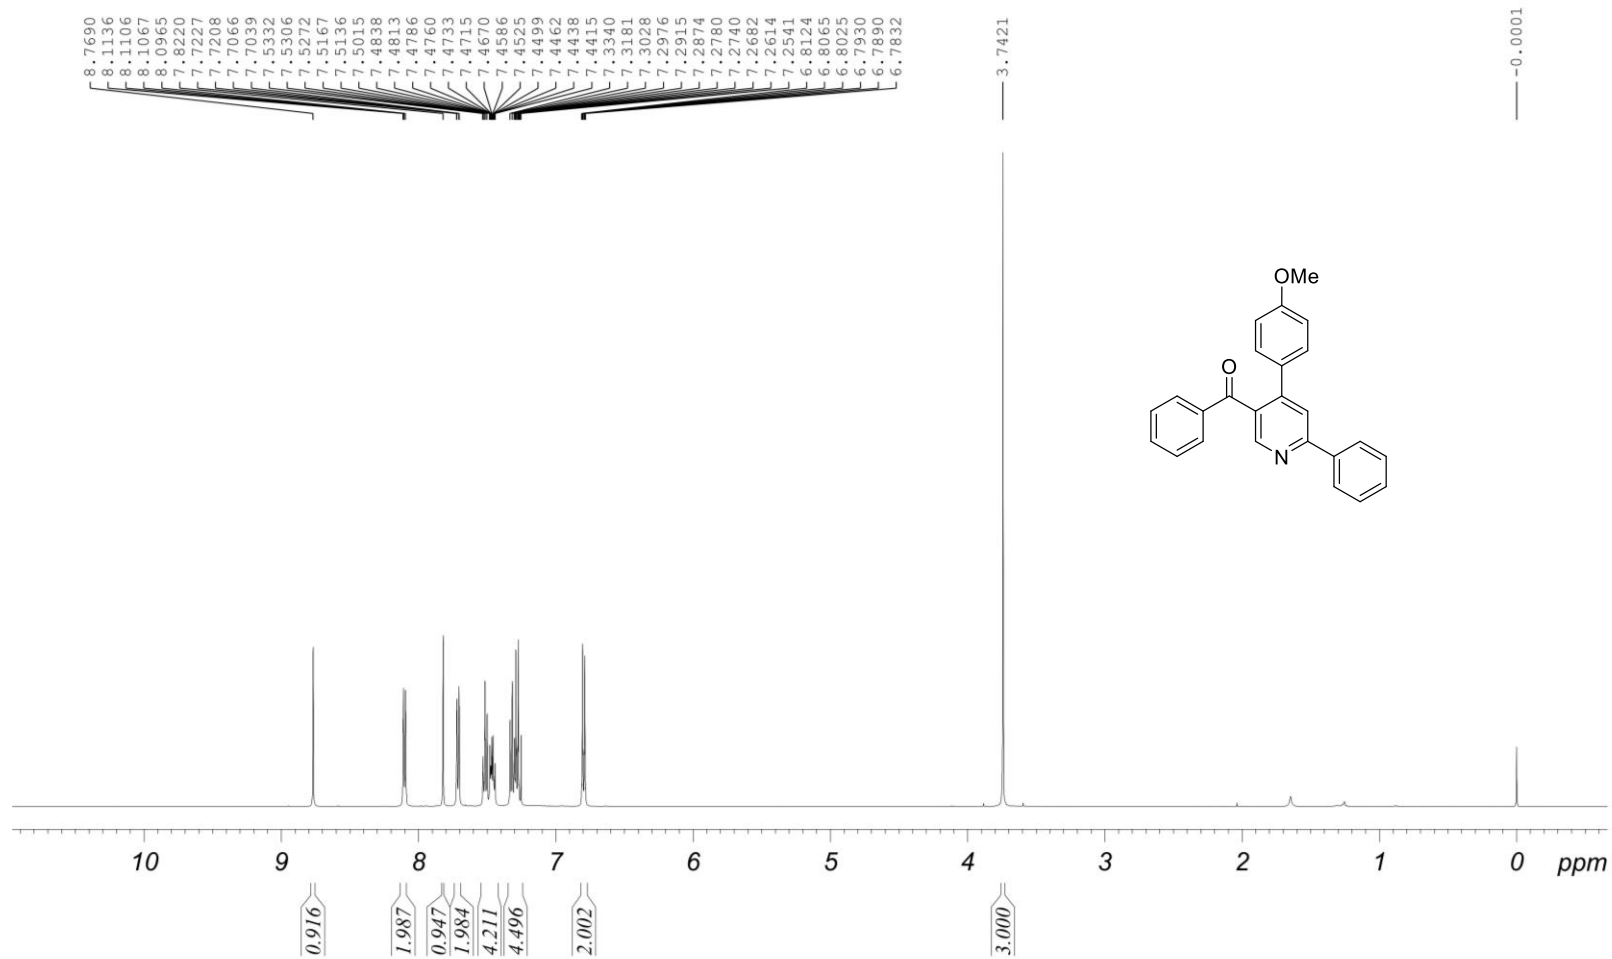

**Figure S57.** <sup>1</sup>H NMR (500 MHz, CDCl<sub>3</sub>) spectra of compound **3w**



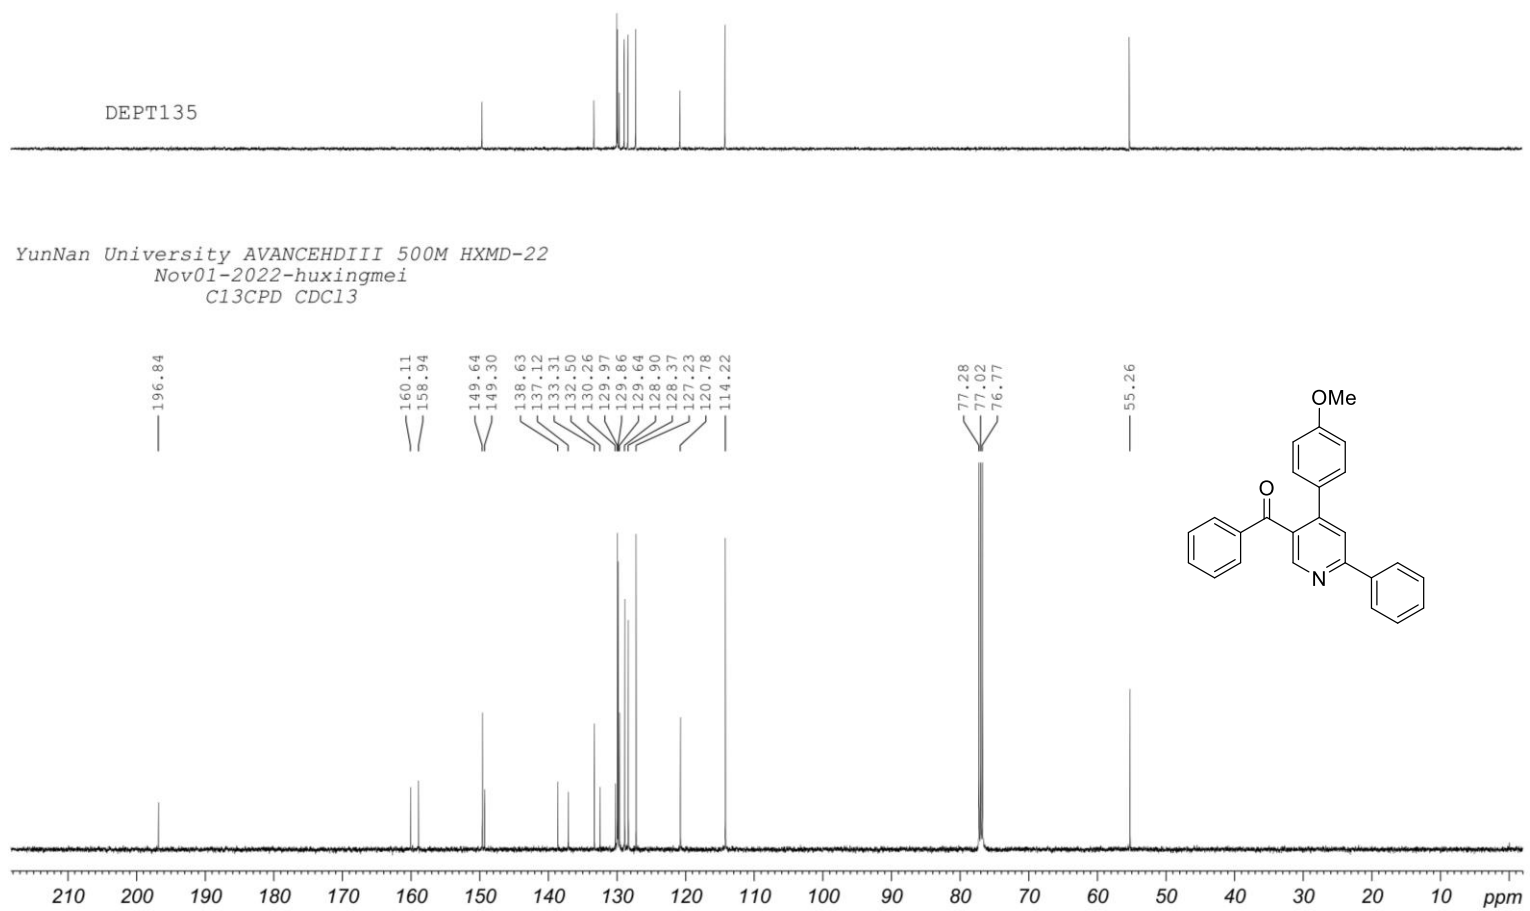

**Figure S58.**  $^{13}\text{C}$  NMR (125 MHz,  $\text{CDCl}_3$ ) spectra of compound **3w**

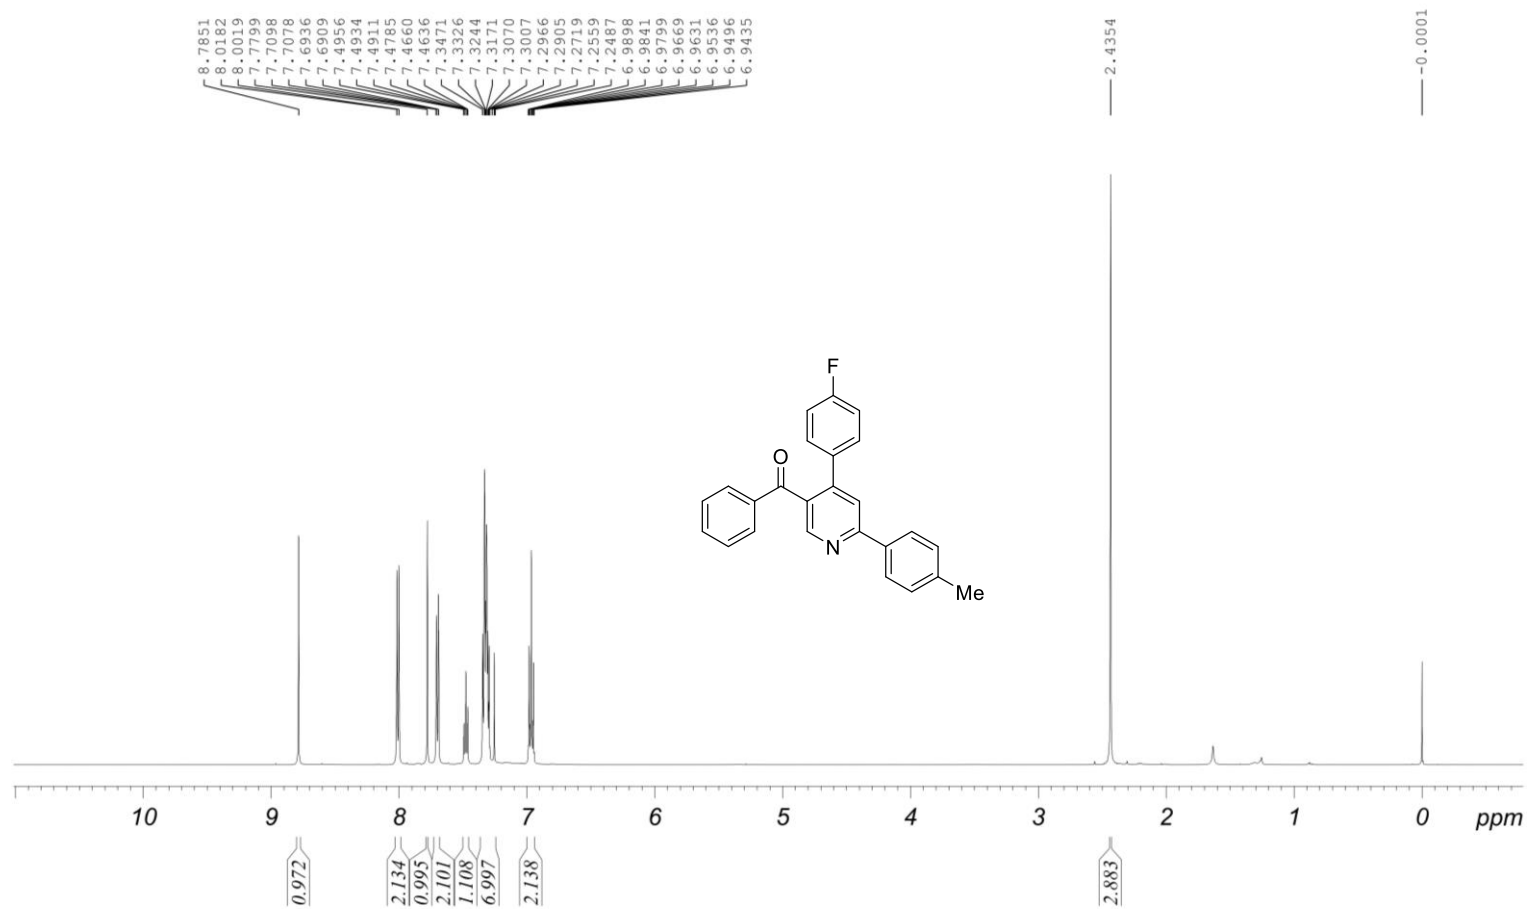

**Figure S59.** <sup>1</sup>H NMR (500 MHz, CDCl<sub>3</sub>) spectra of compound **3x**

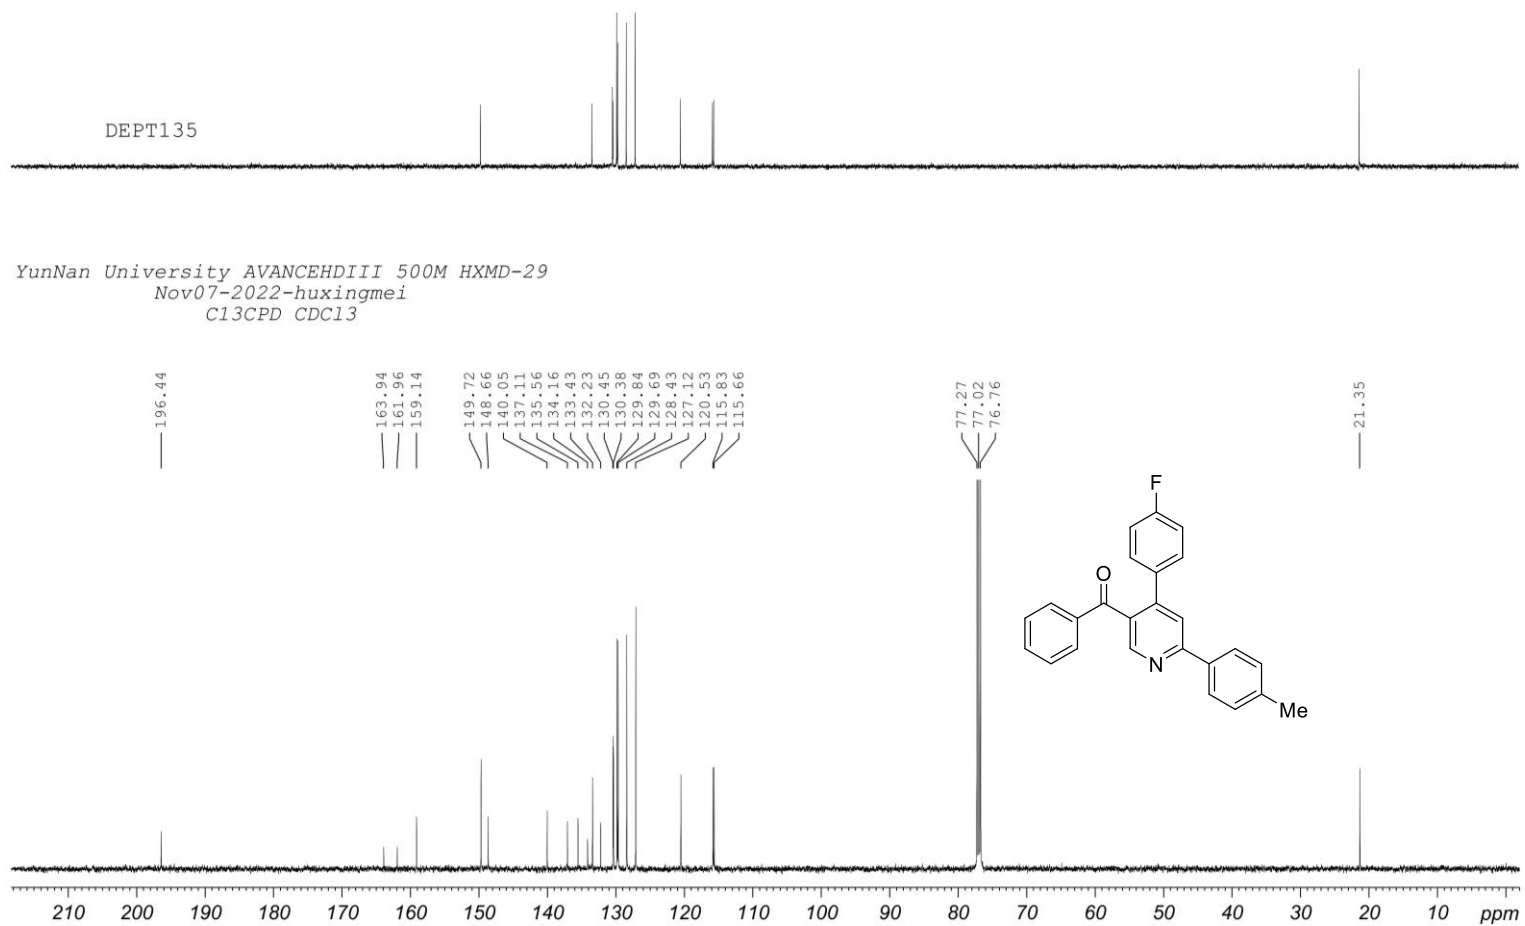

**Figure S60.**  $^{13}\text{C}$  NMR (125 MHz,  $\text{CDCl}_3$ ) spectra of compound **3x**

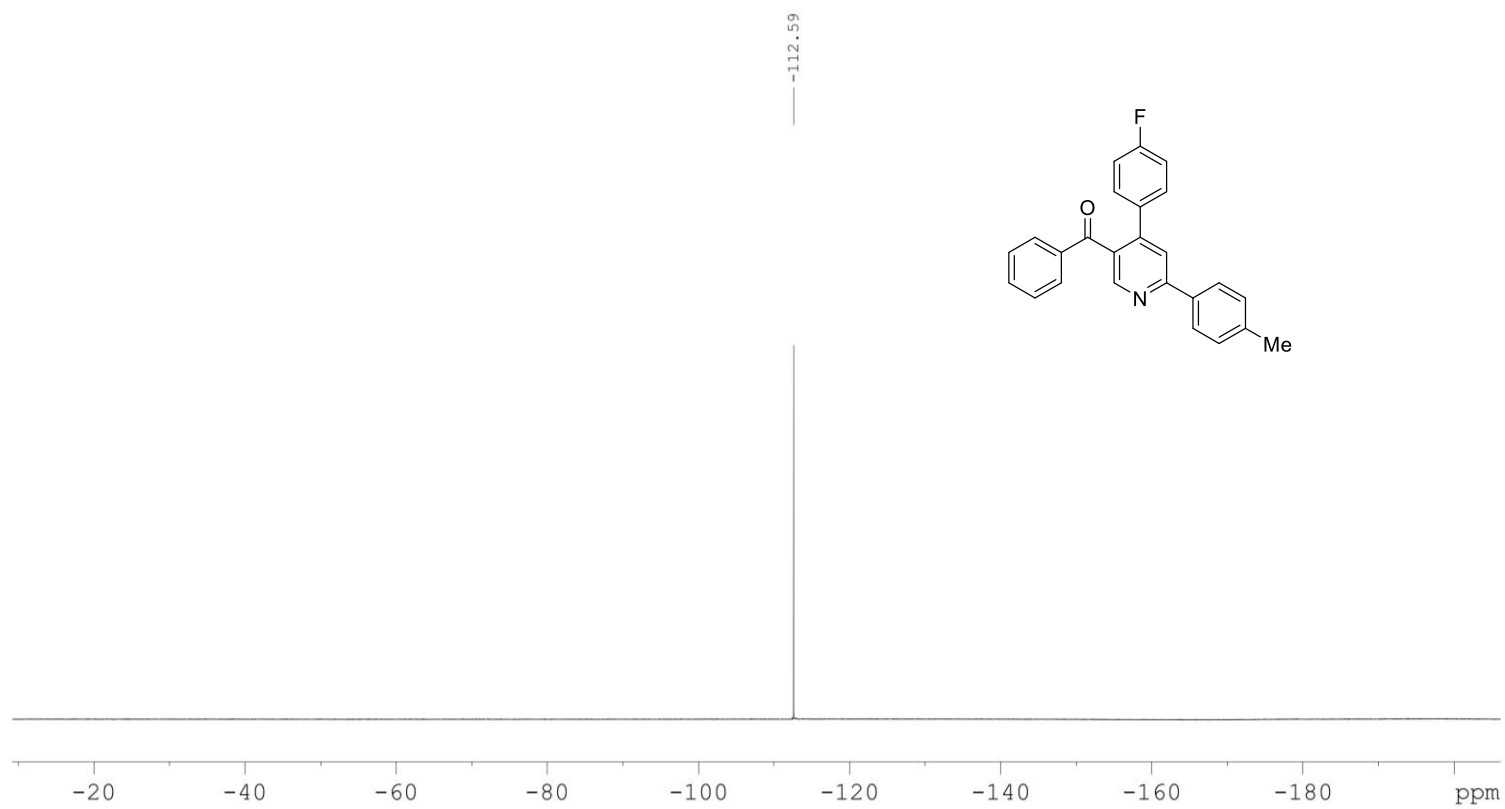

**Figure S61.**  $^{19}\text{F}$  NMR (470 MHz,  $\text{CDCl}_3$ ) spectra of compound **3x**

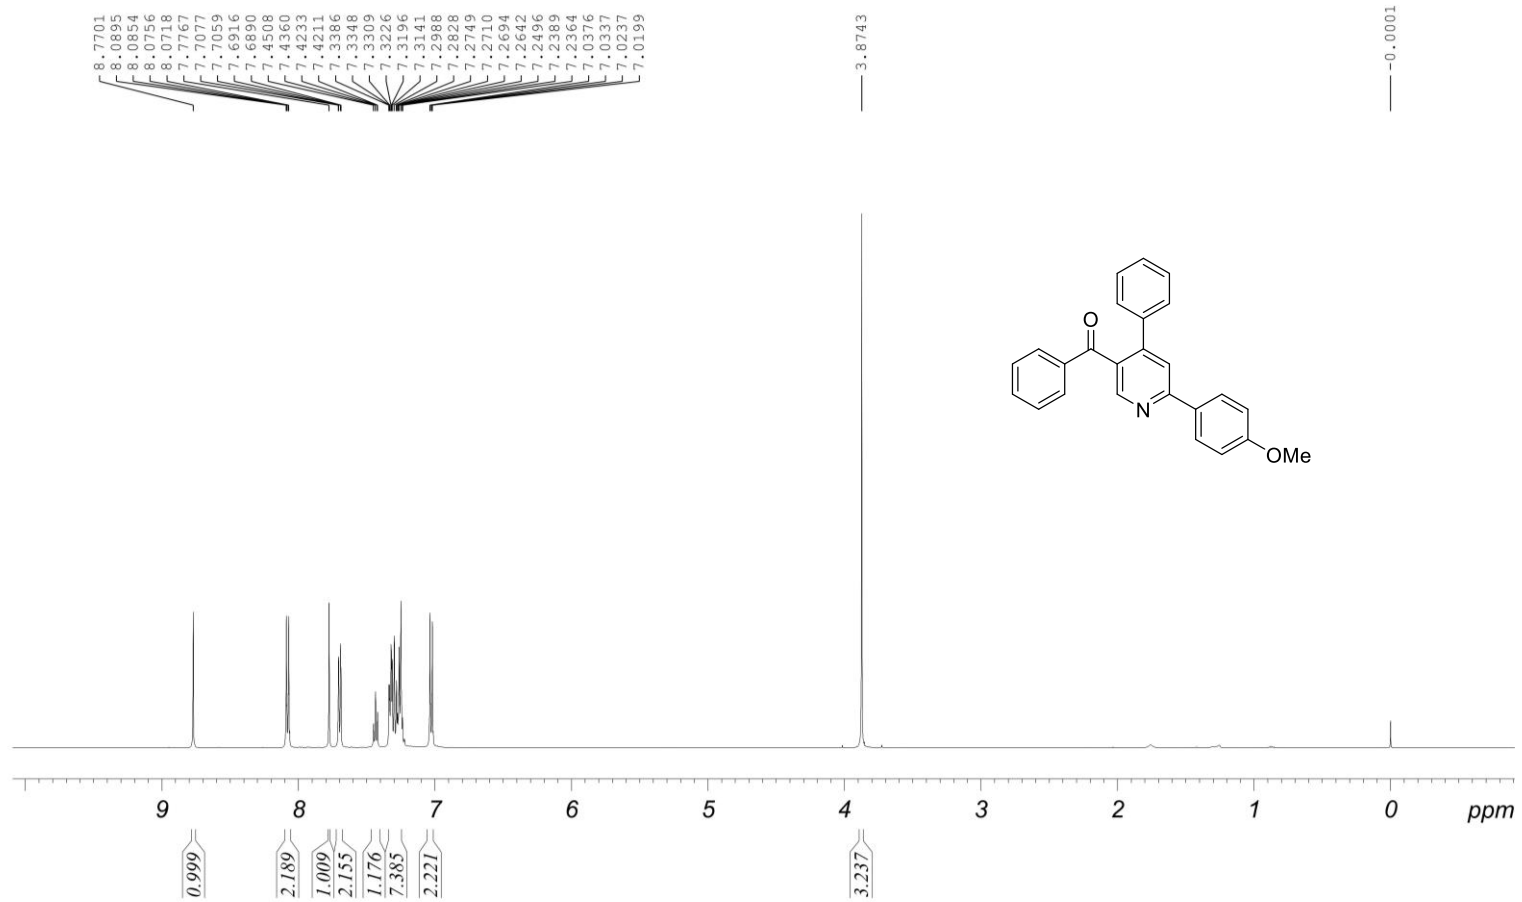

**Figure S62.** <sup>1</sup>H NMR (500 MHz, CDCl<sub>3</sub>) spectra of compound **3y**

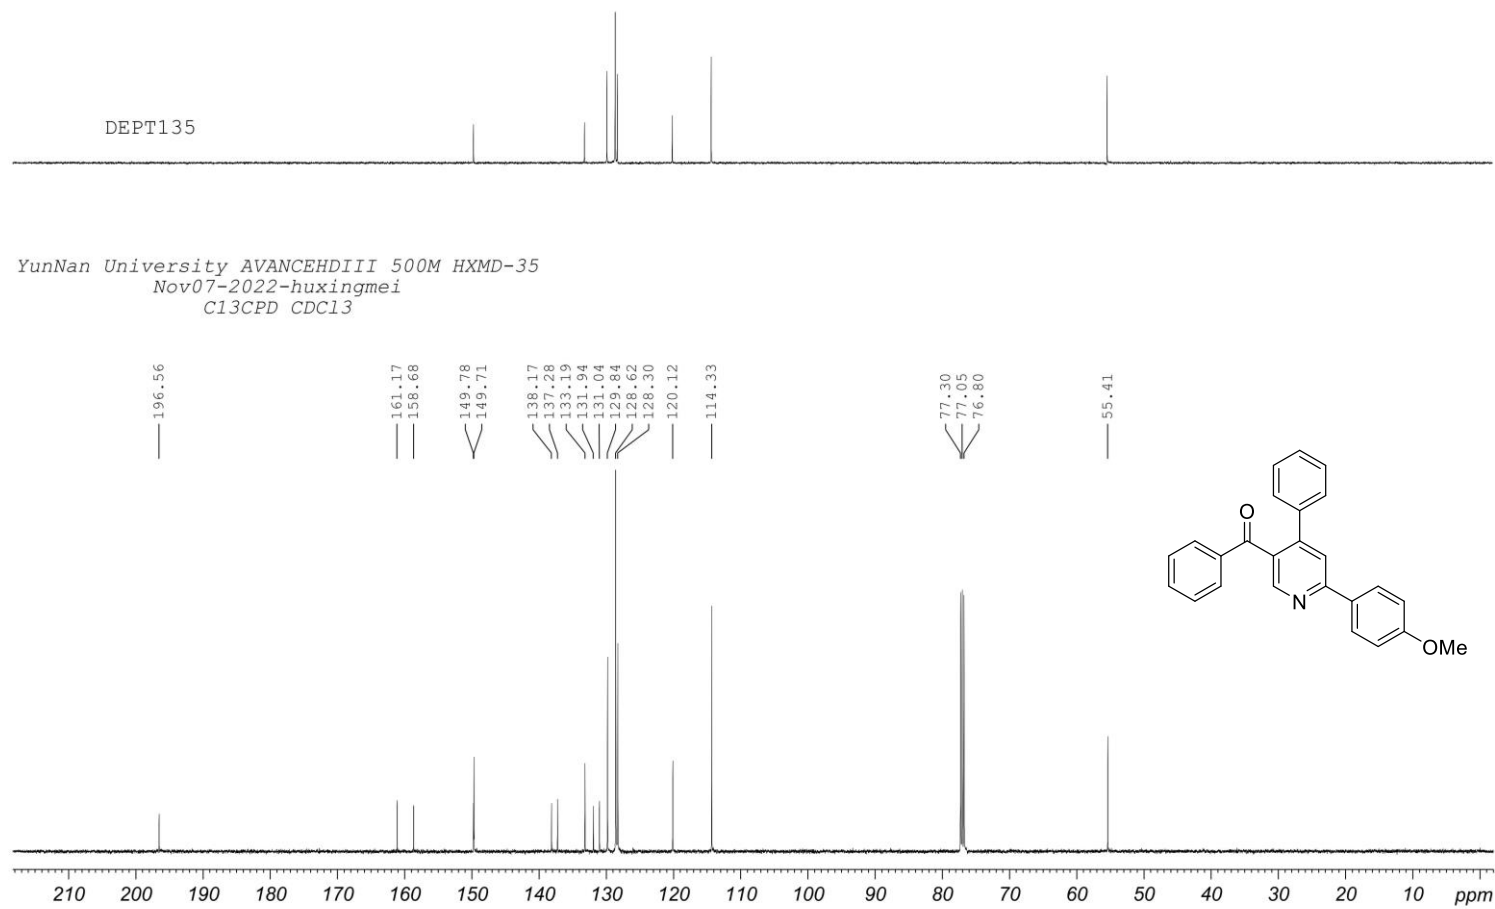

**Figure S63.**  $^{13}\text{C}$  NMR (125 MHz,  $\text{CDCl}_3$ ) spectra of compound **3y**

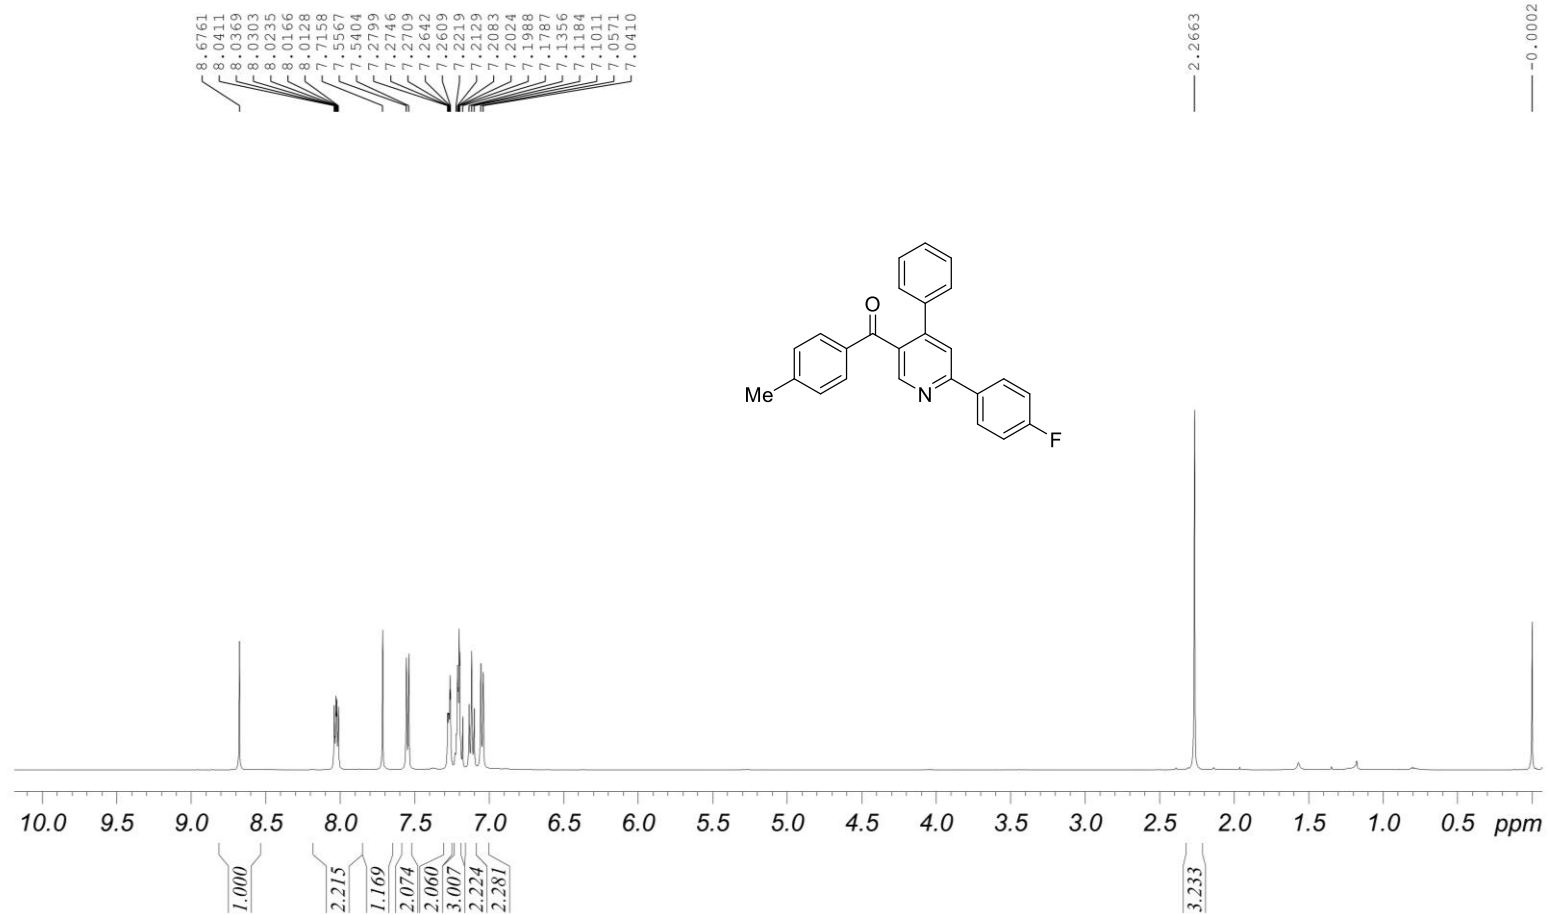

**Figure S64.** <sup>1</sup>H NMR (500 MHz, CDCl<sub>3</sub>) spectra of compound **3z**

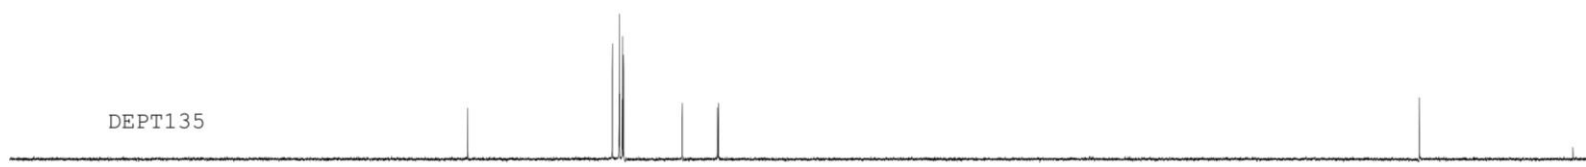

YunNan University AVANCEHDIII 500M HXMD-12-1  
Oct19-2022-huxingmei  
C13CPD CDCl3

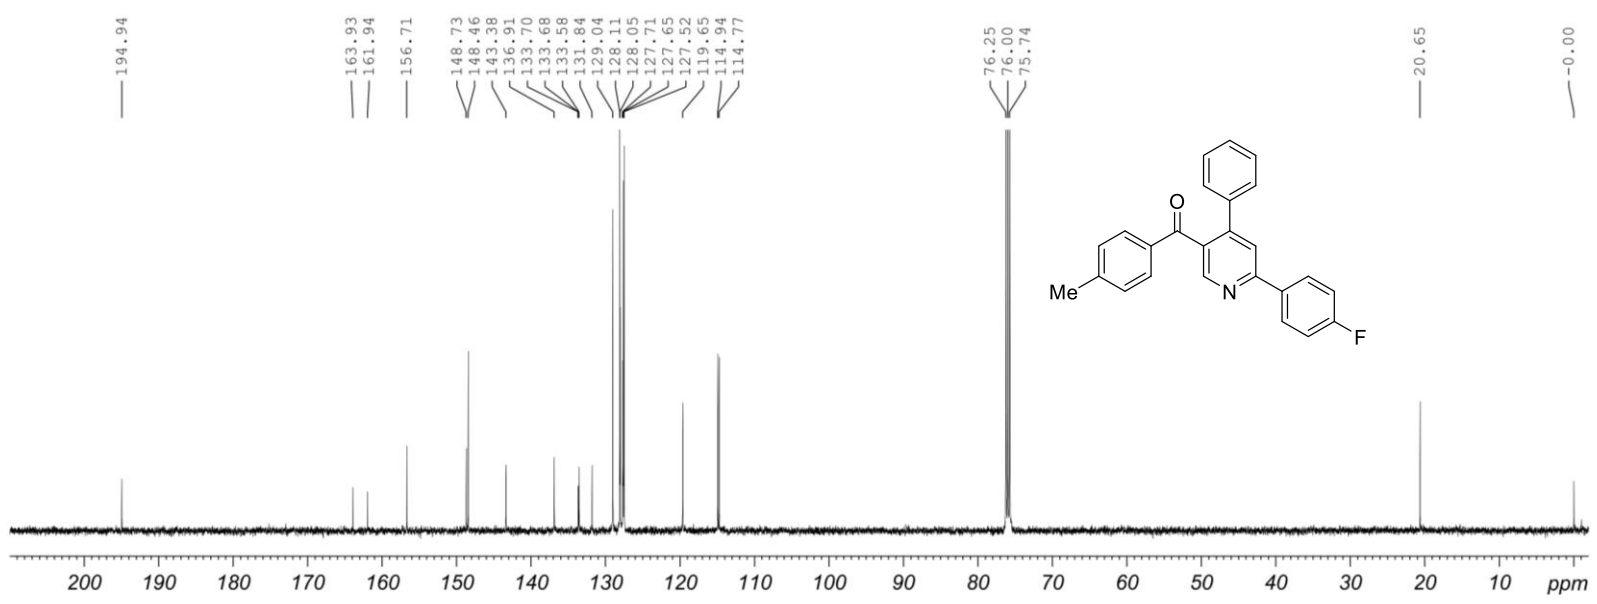

Figure S65. <sup>13</sup>C NMR (125 MHz, CDCl<sub>3</sub>) spectra of compound **3z**



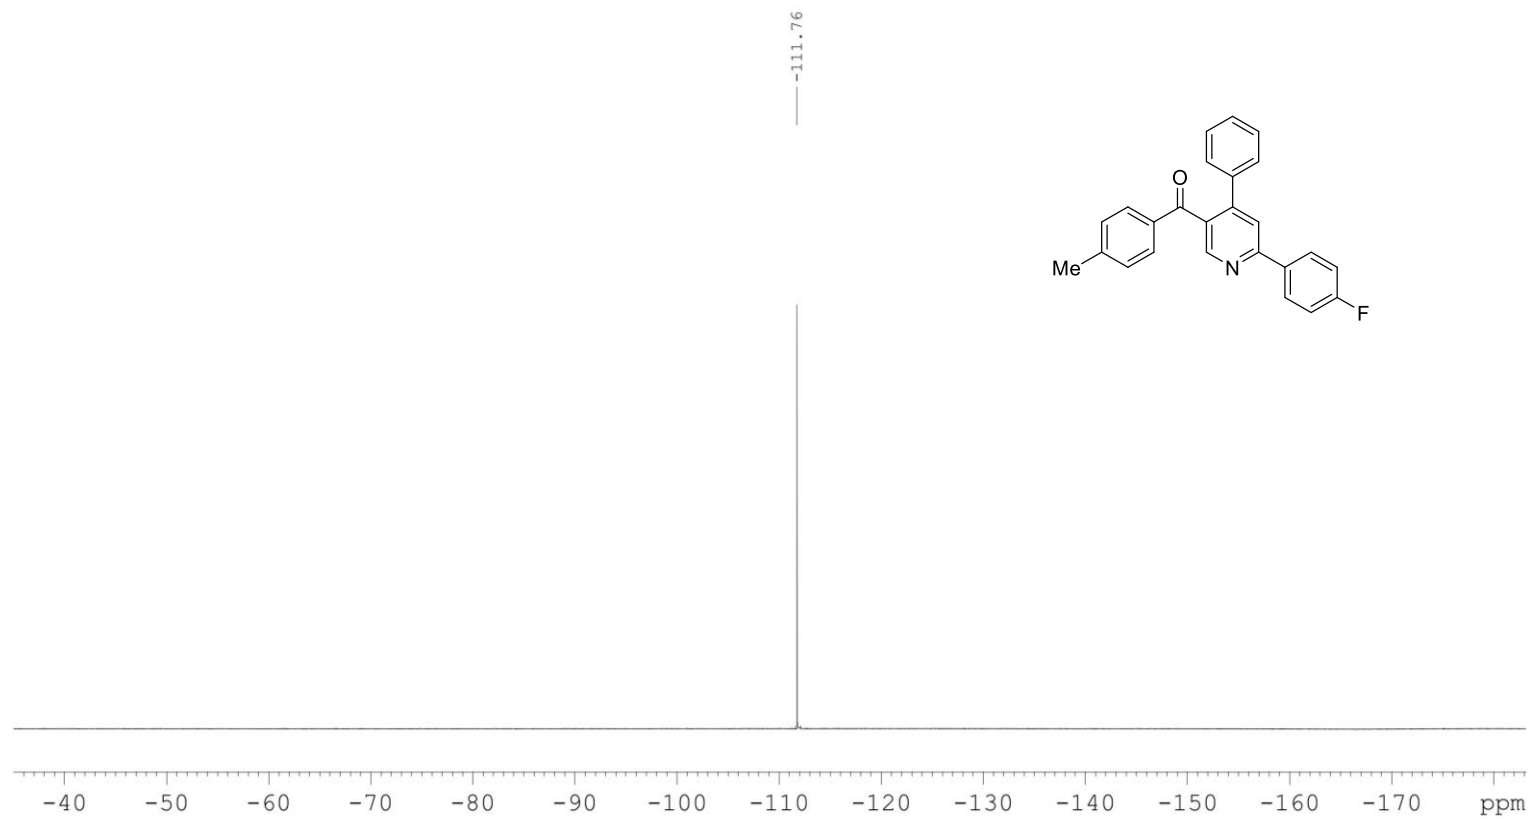

**Figure S66.**  $^{19}\text{F}$  NMR (470 MHz,  $\text{CDCl}_3$ ) spectra of compound **3z**

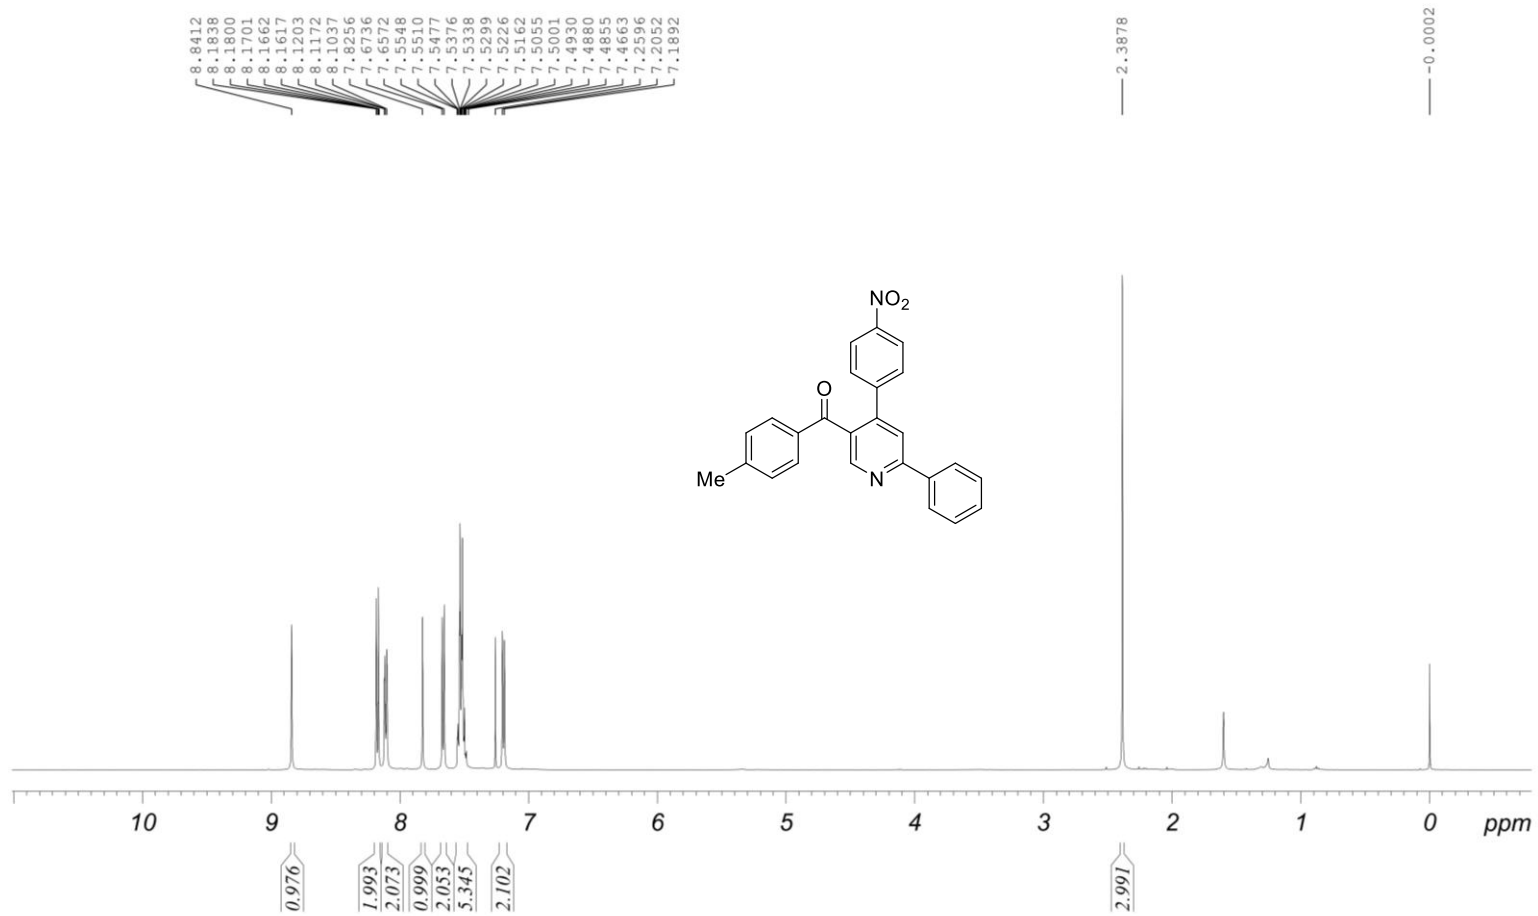

**Figure S67.** <sup>1</sup>H NMR (500 MHz, CDCl<sub>3</sub>) spectra of compound 3a'

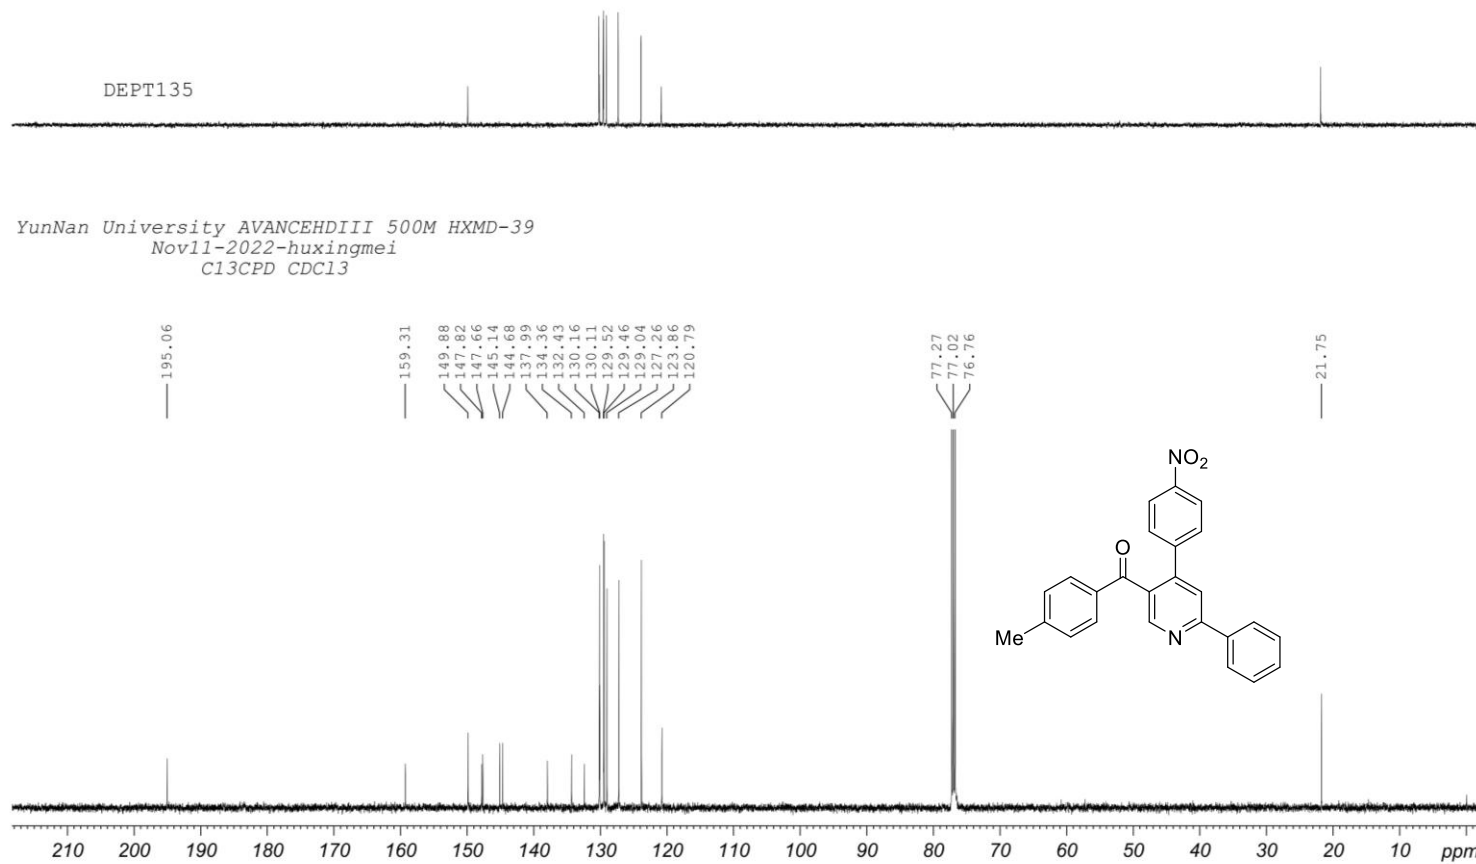

Figure S68. <sup>13</sup>C NMR (125 MHz, CDCl<sub>3</sub>) spectra of compound 3a'

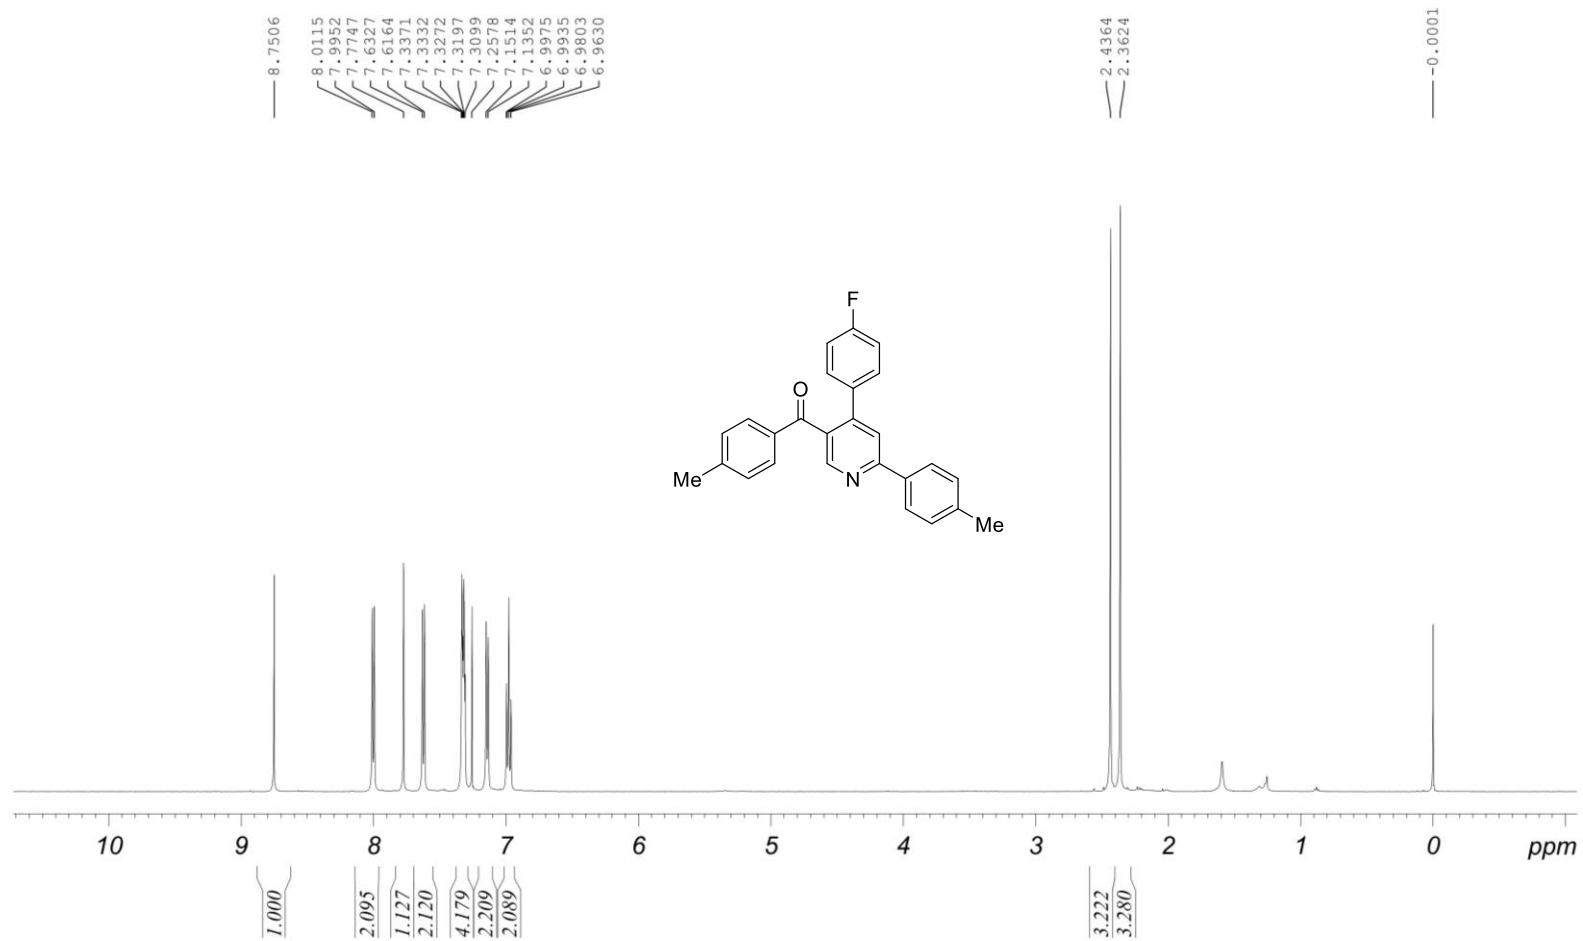

**Figure S69.** <sup>1</sup>H NMR (500 MHz, CDCl<sub>3</sub>) spectra of compound **3b'**

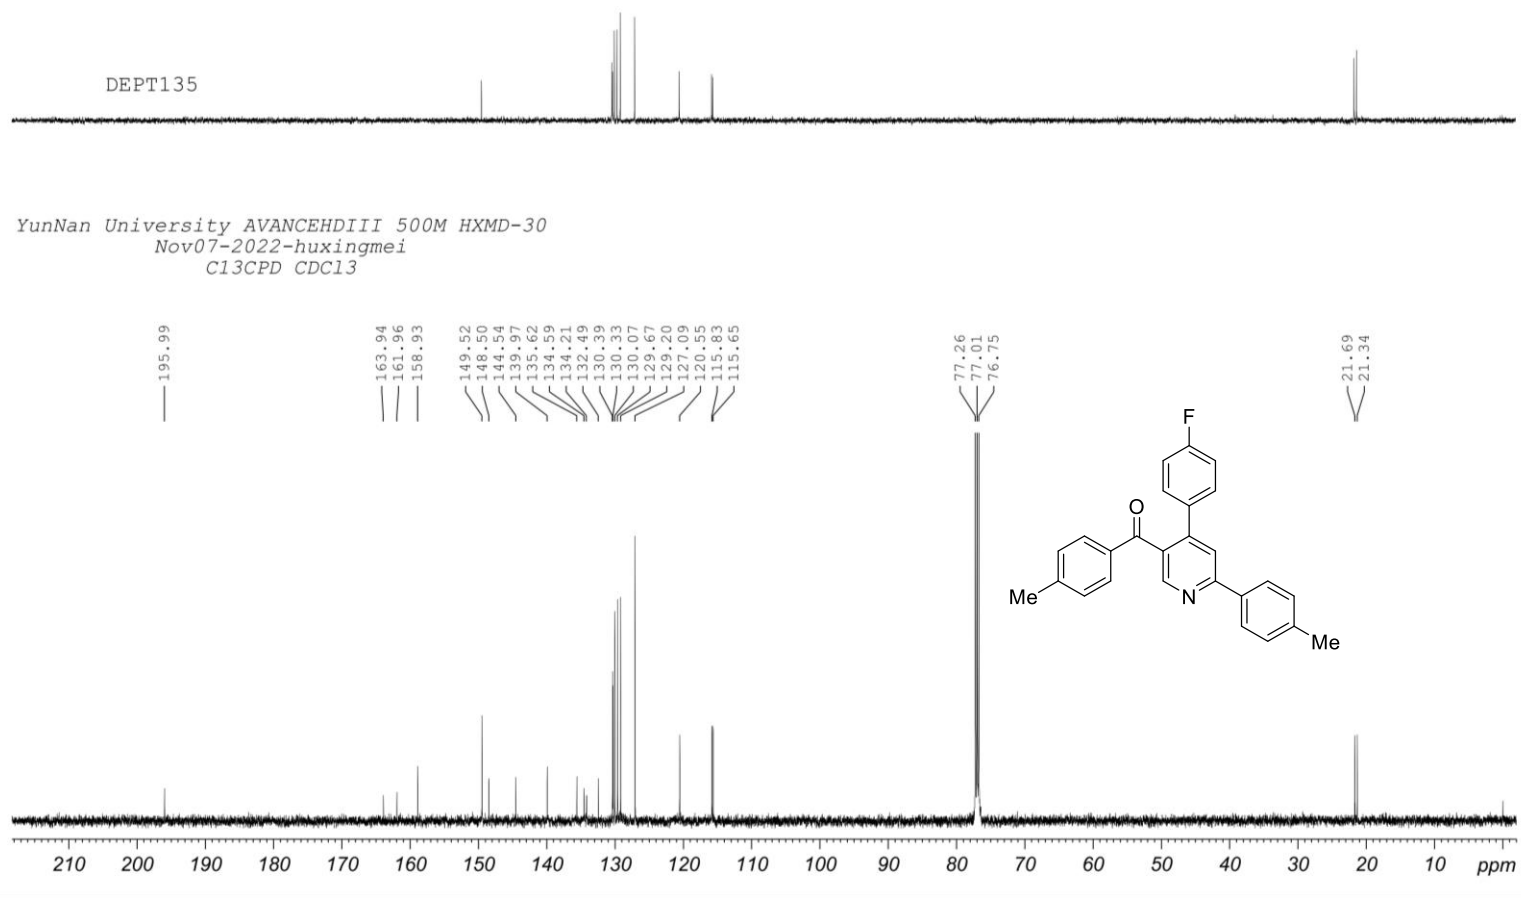

**Figure S70.**  $^{13}\text{C}$  NMR (125 MHz,  $\text{CDCl}_3$ ) spectra of compound **3b'**

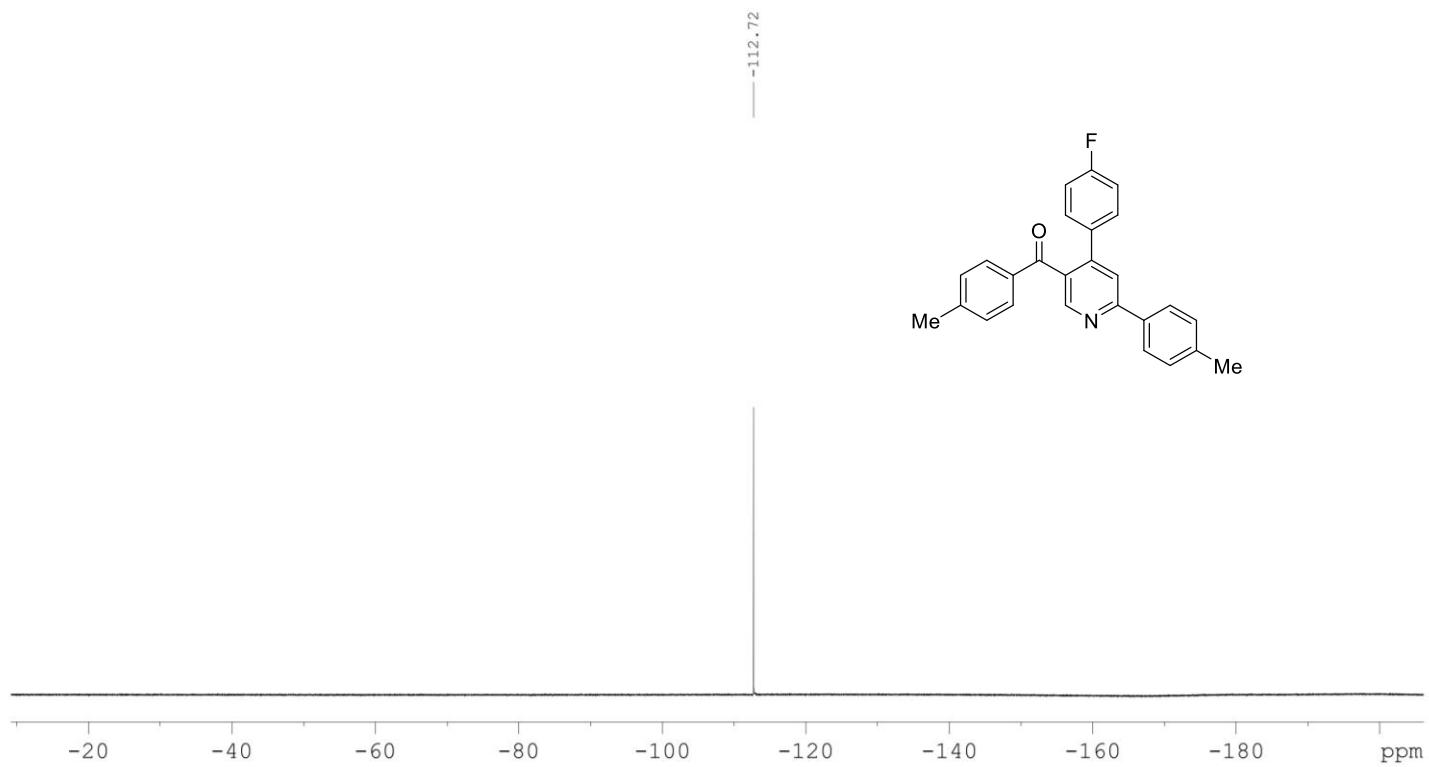

**Figure S71.**  $^{19}\text{F}$  NMR (470 MHz,  $\text{CDCl}_3$ ) spectra of compound **3b'**

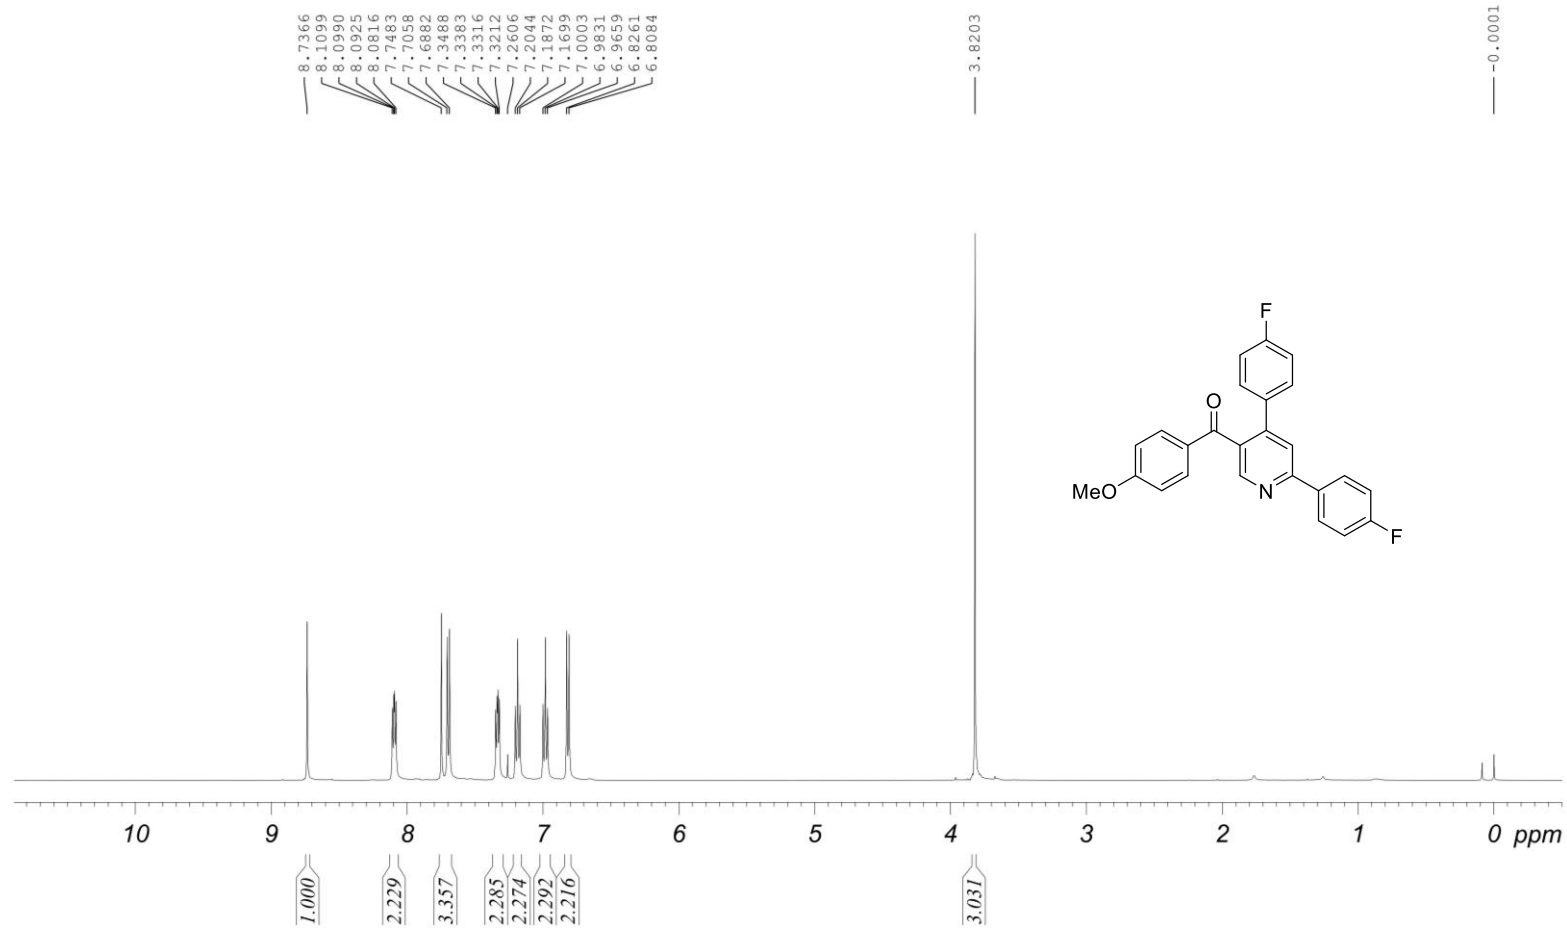

**Figure S72.** <sup>1</sup>H NMR (500 MHz, CDCl<sub>3</sub>) spectra of compound 3c'

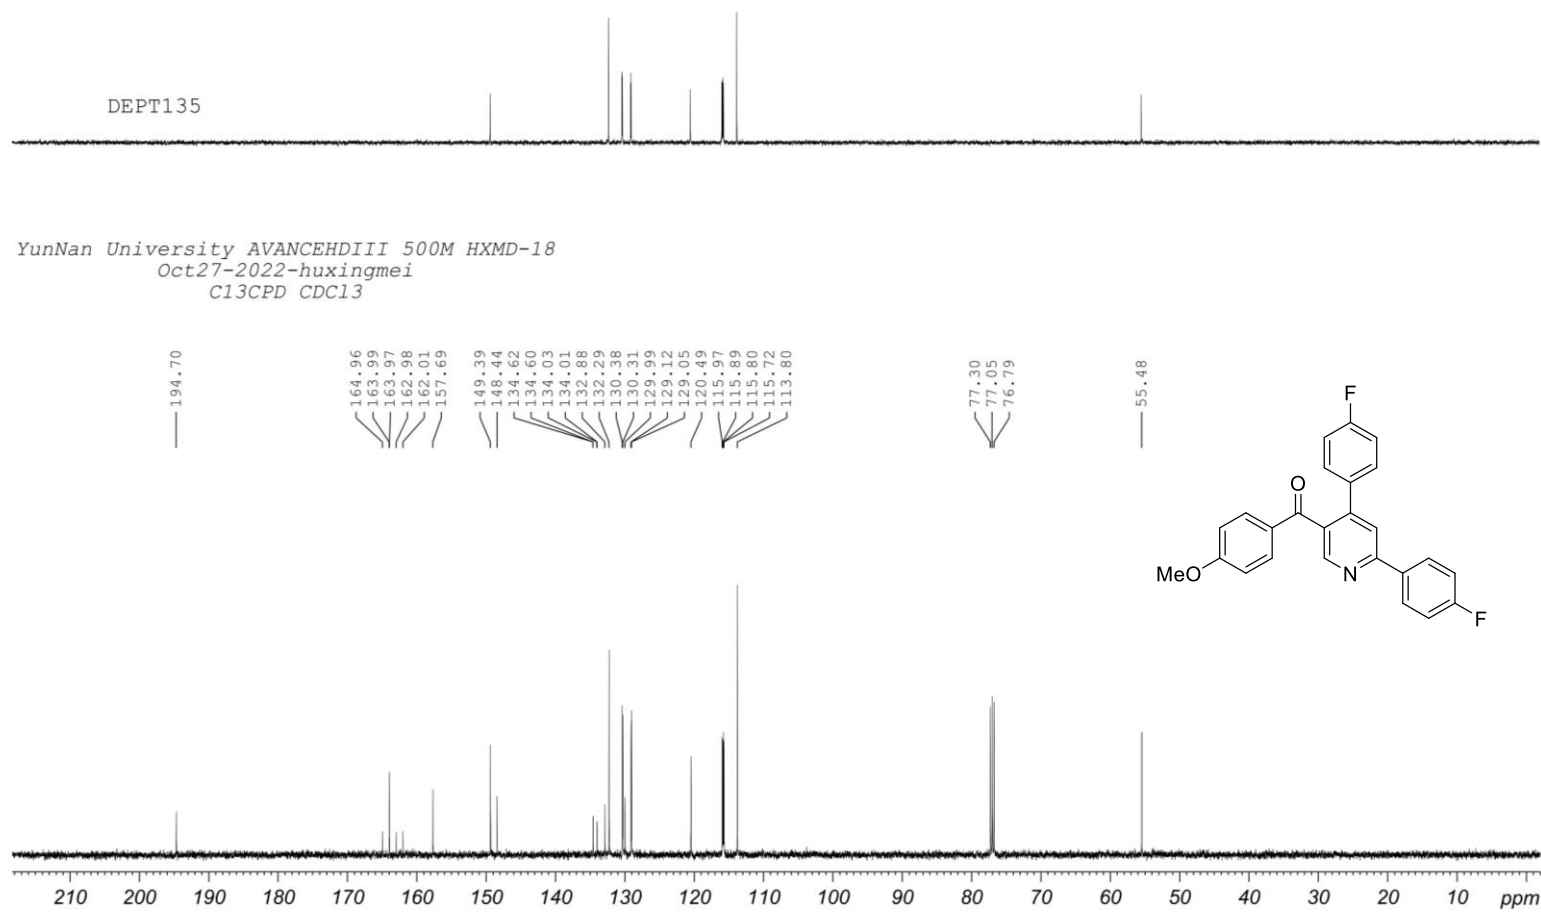

Figure S73.  $^{13}\text{C}$  NMR (125 MHz,  $\text{CDCl}_3$ ) spectra of compound **3c'**



YunNan University AVANCEHDIII 500M HXMD-18  
Oct27-2022-huxingmei  
F19CPD CDCl3

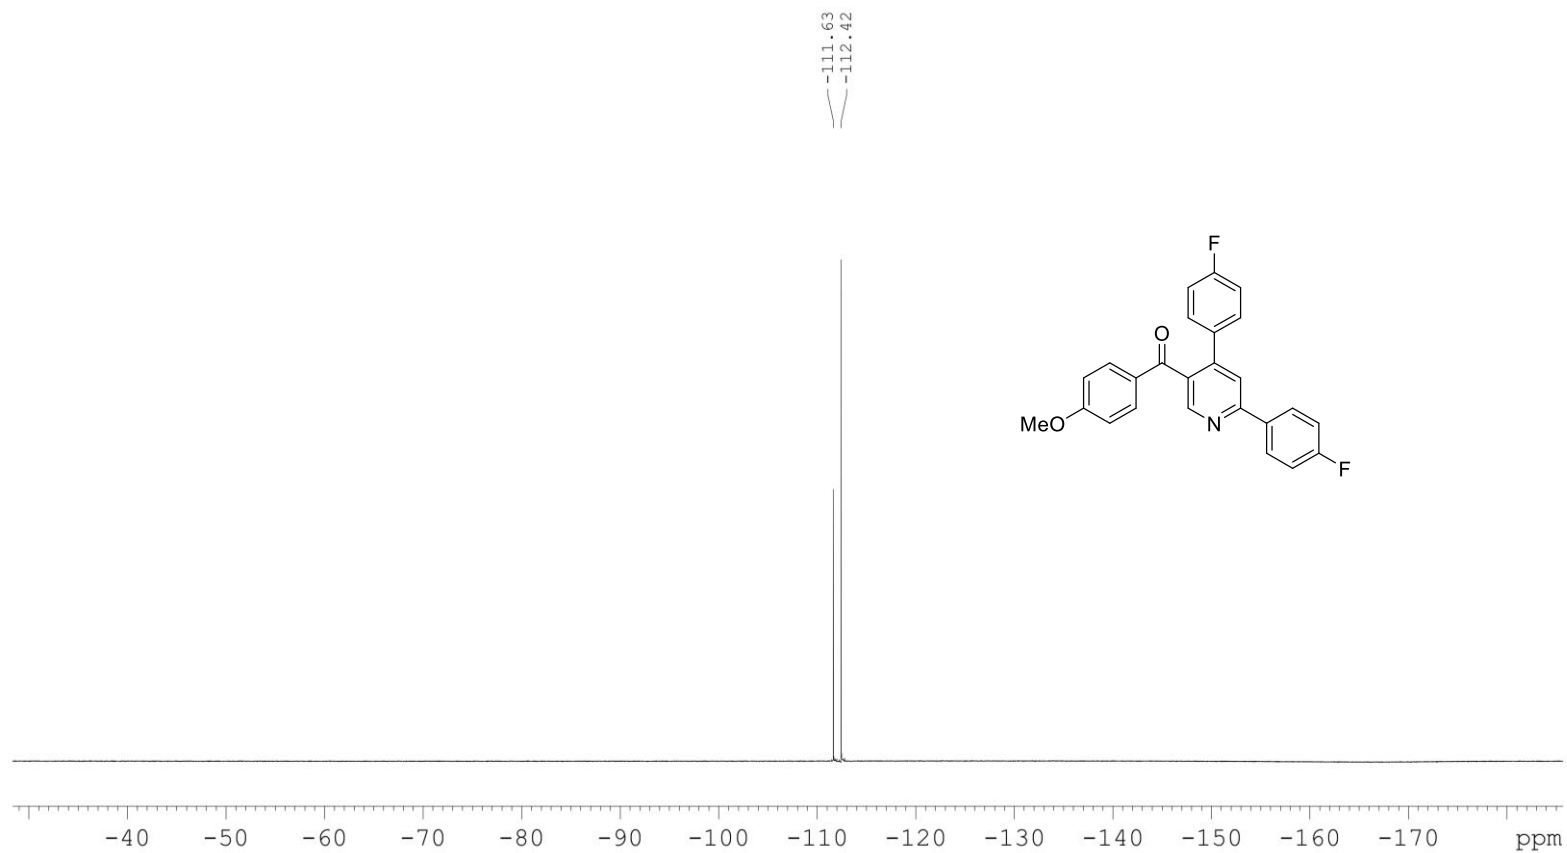

**Figure S74.**  $^{19}\text{F}$  NMR (470 MHz,  $\text{CDCl}_3$ ) spectra of compound **3c'**

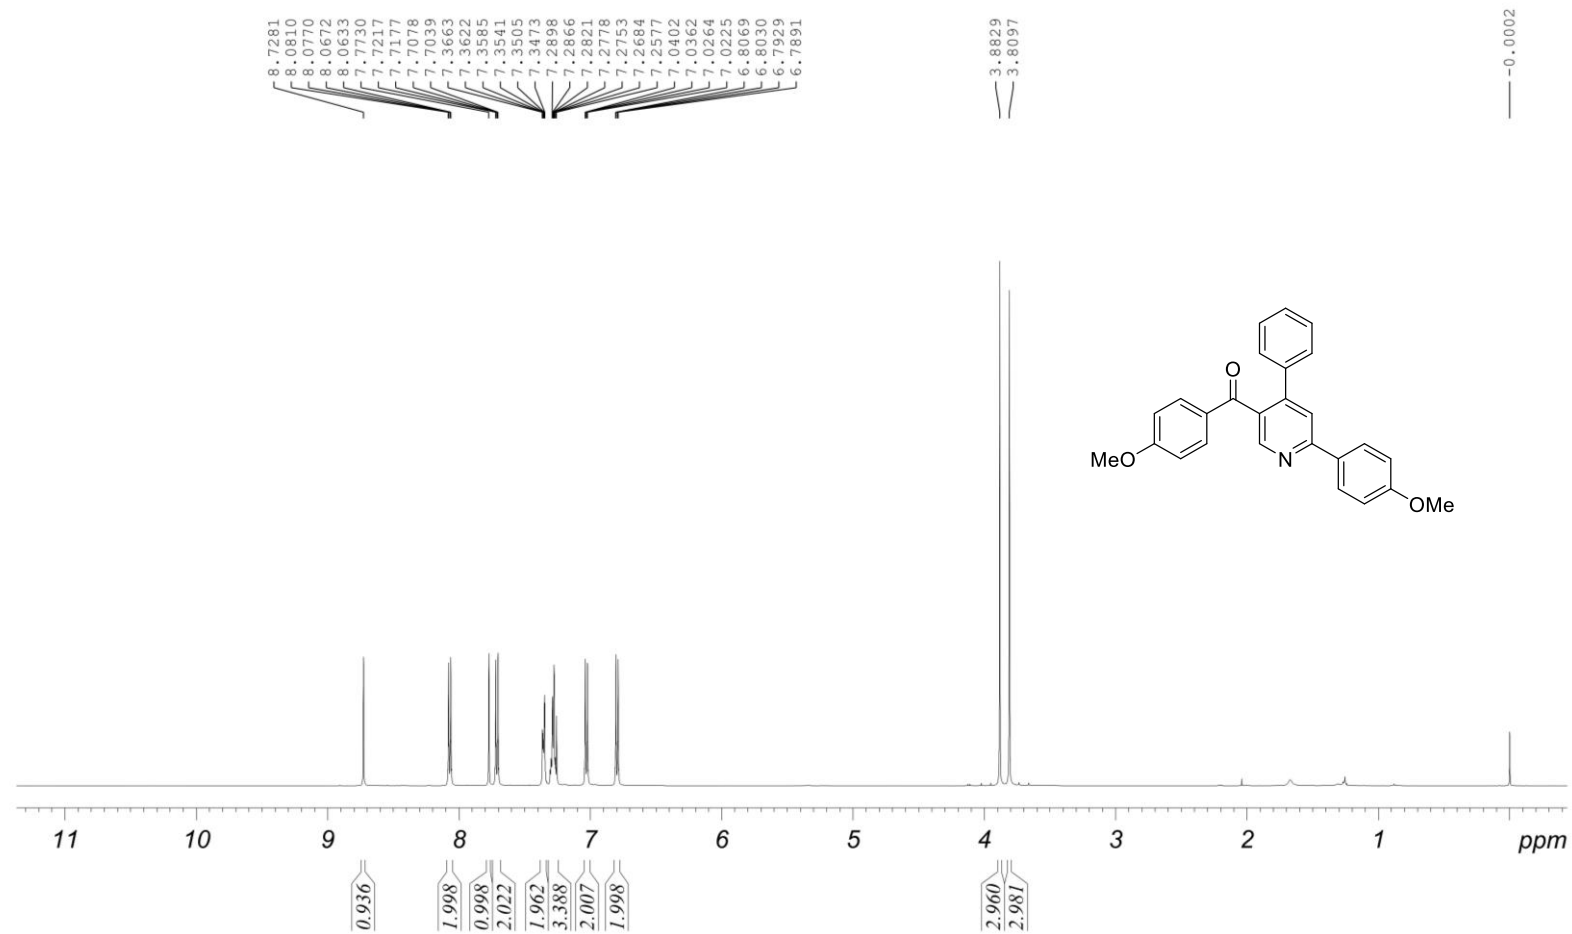

**Figure S75.** <sup>1</sup>H NMR (600 MHz, CDCl<sub>3</sub>) spectra of compound 3d'

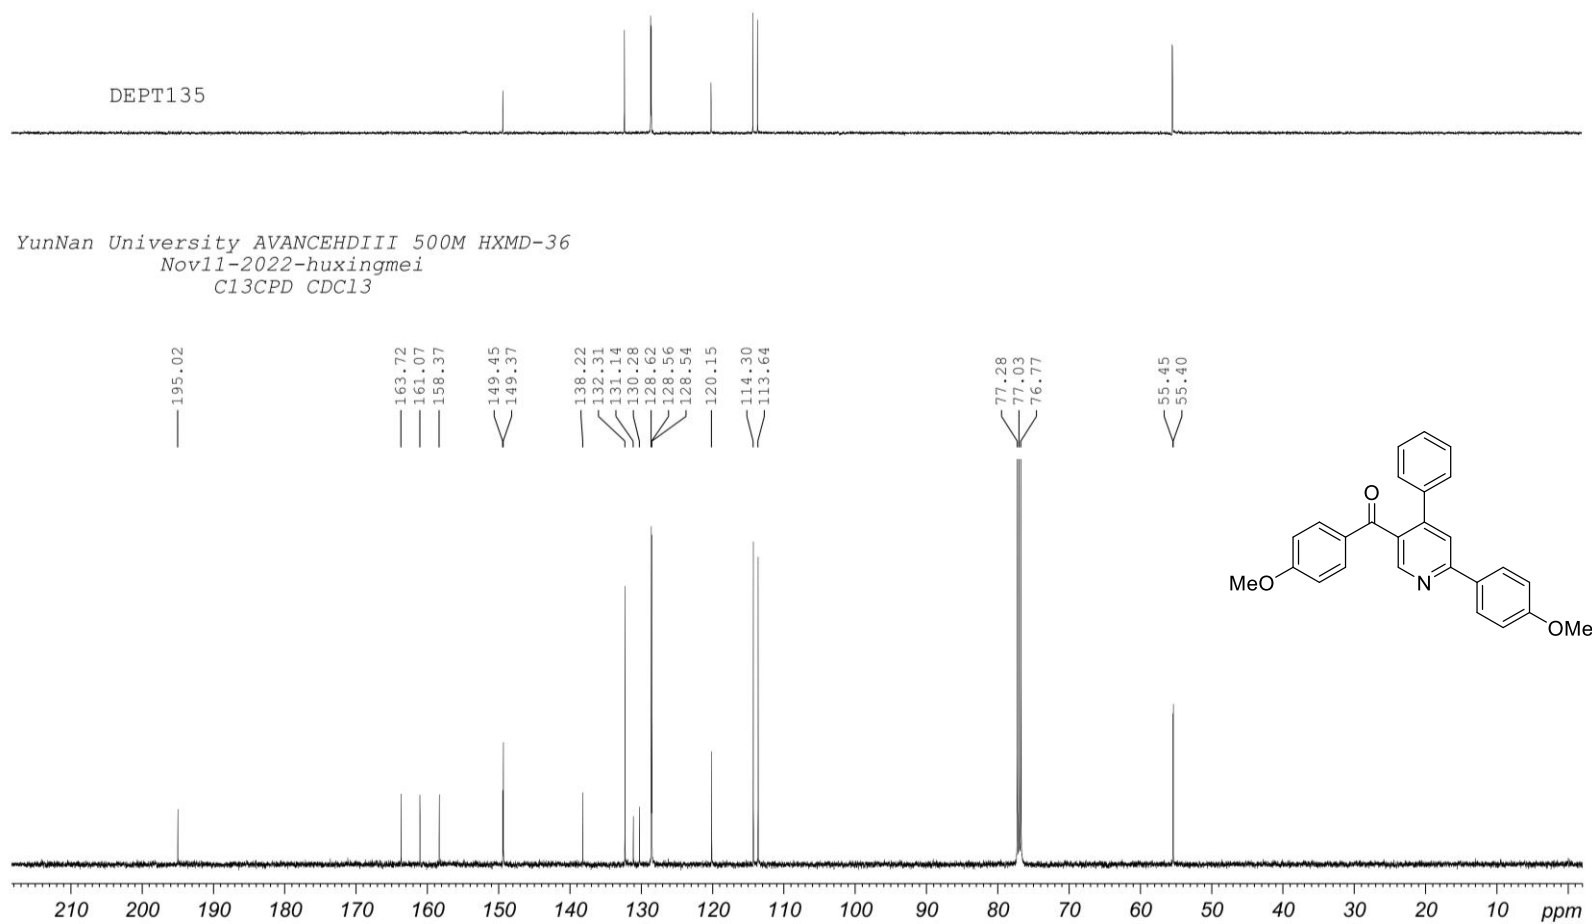

Figure S76.  $^{13}\text{C}$  NMR (150 MHz,  $\text{CDCl}_3$ ) spectra of compound 3d'

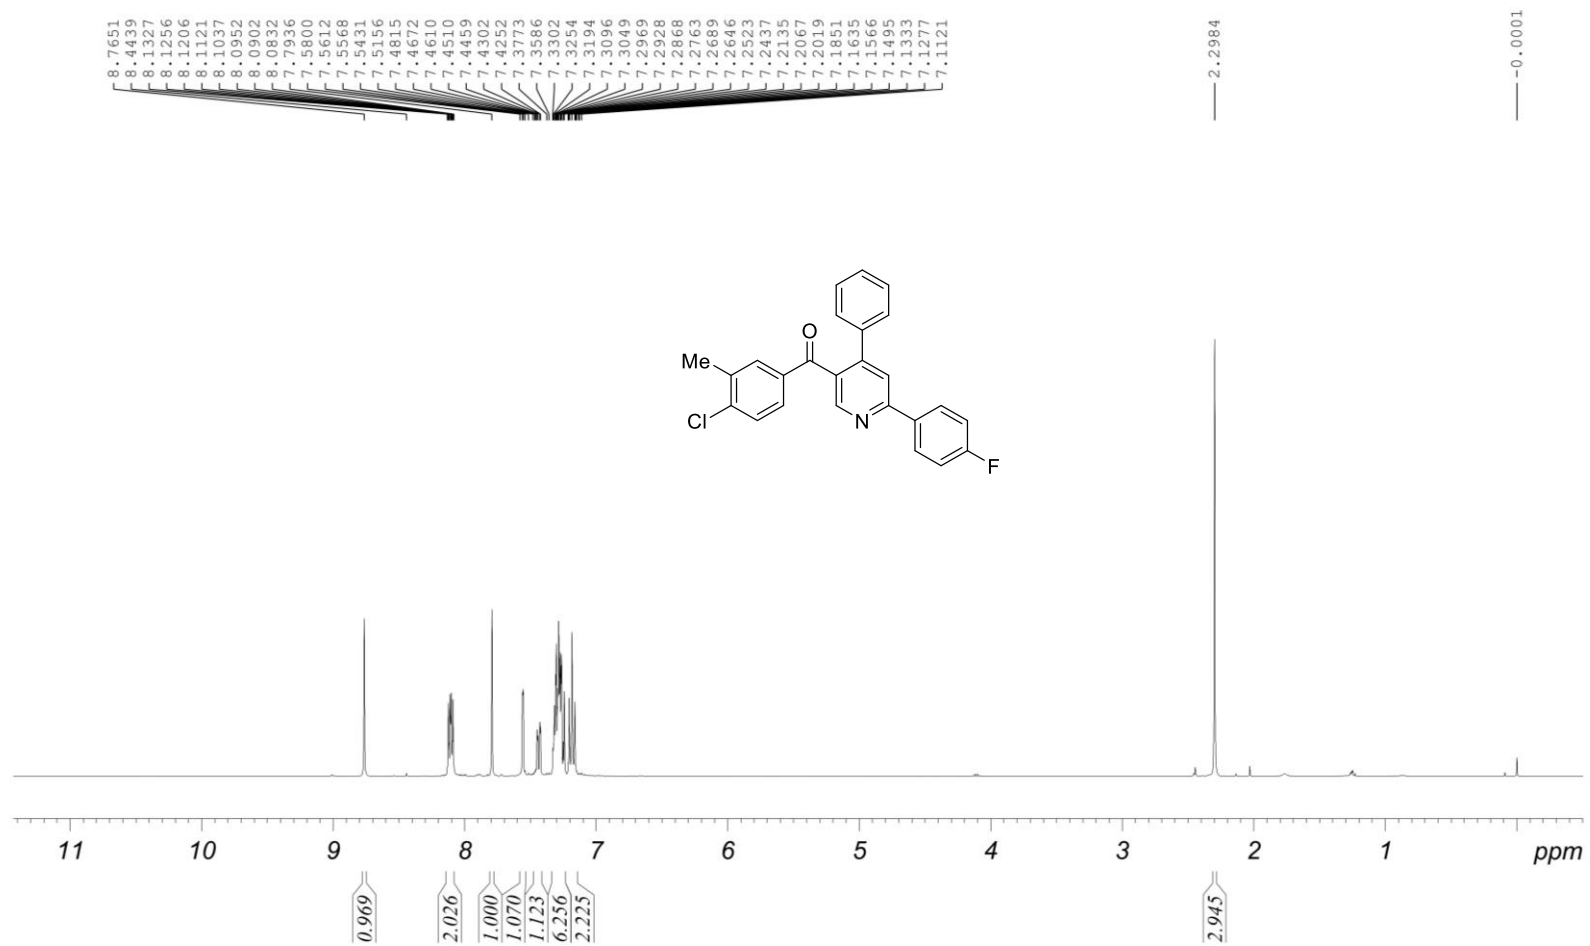

**Figure S77.**  $^1\text{H}$  NMR (400 MHz,  $\text{CDCl}_3$ ) spectra of compound **3e'**

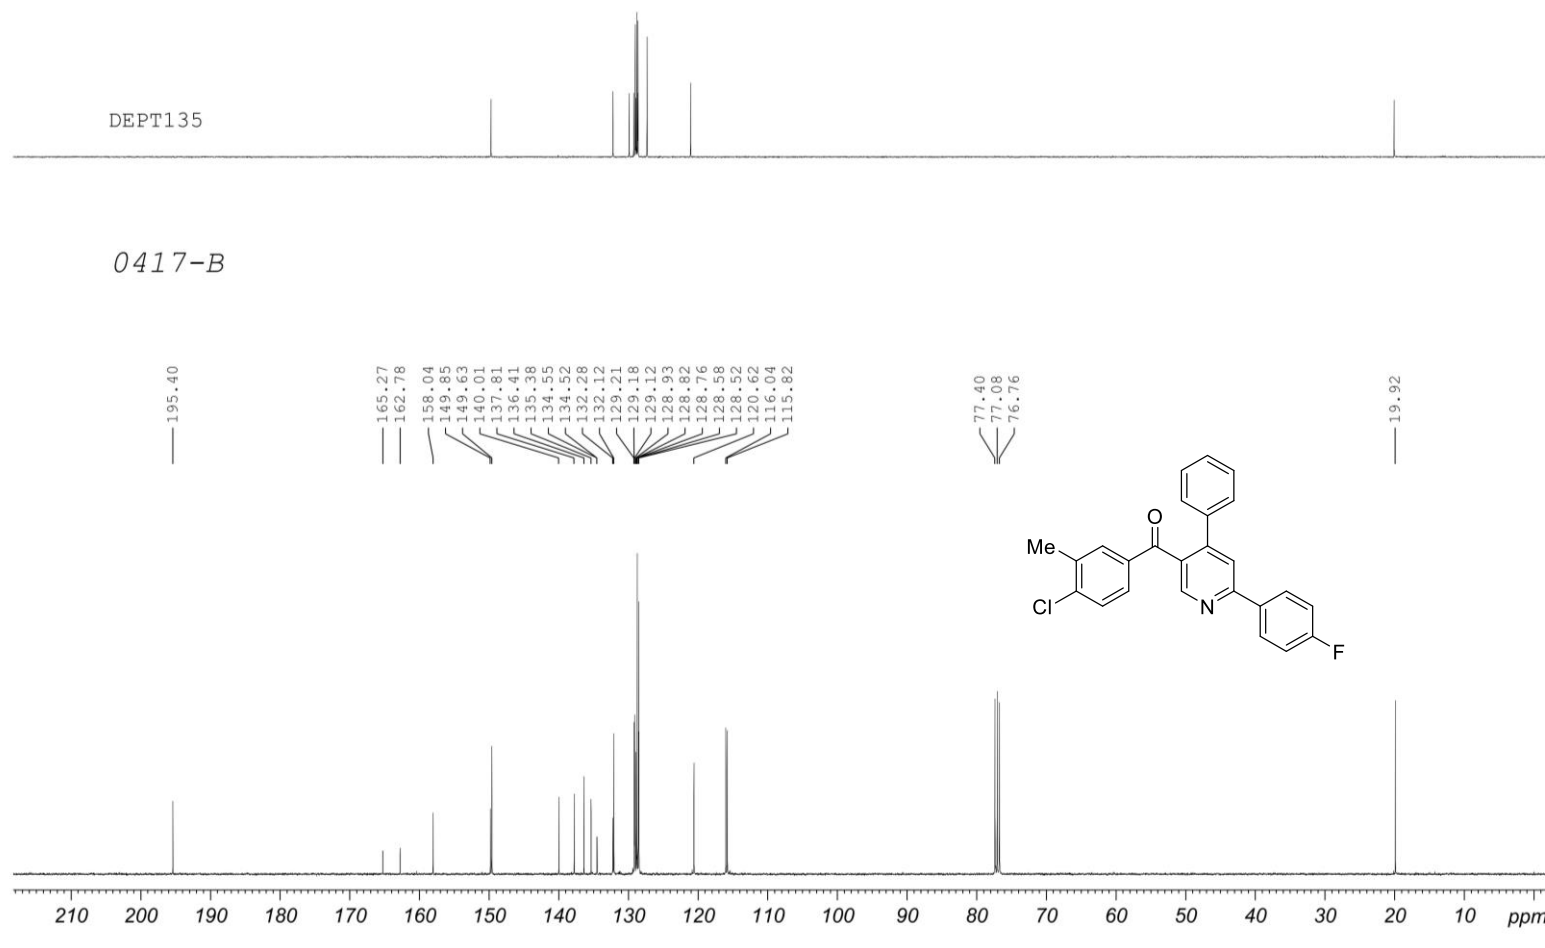

**Figure S78.**  $^{13}\text{C}$  NMR (100 MHz,  $\text{CDCl}_3$ ) spectra of compound **3e'**

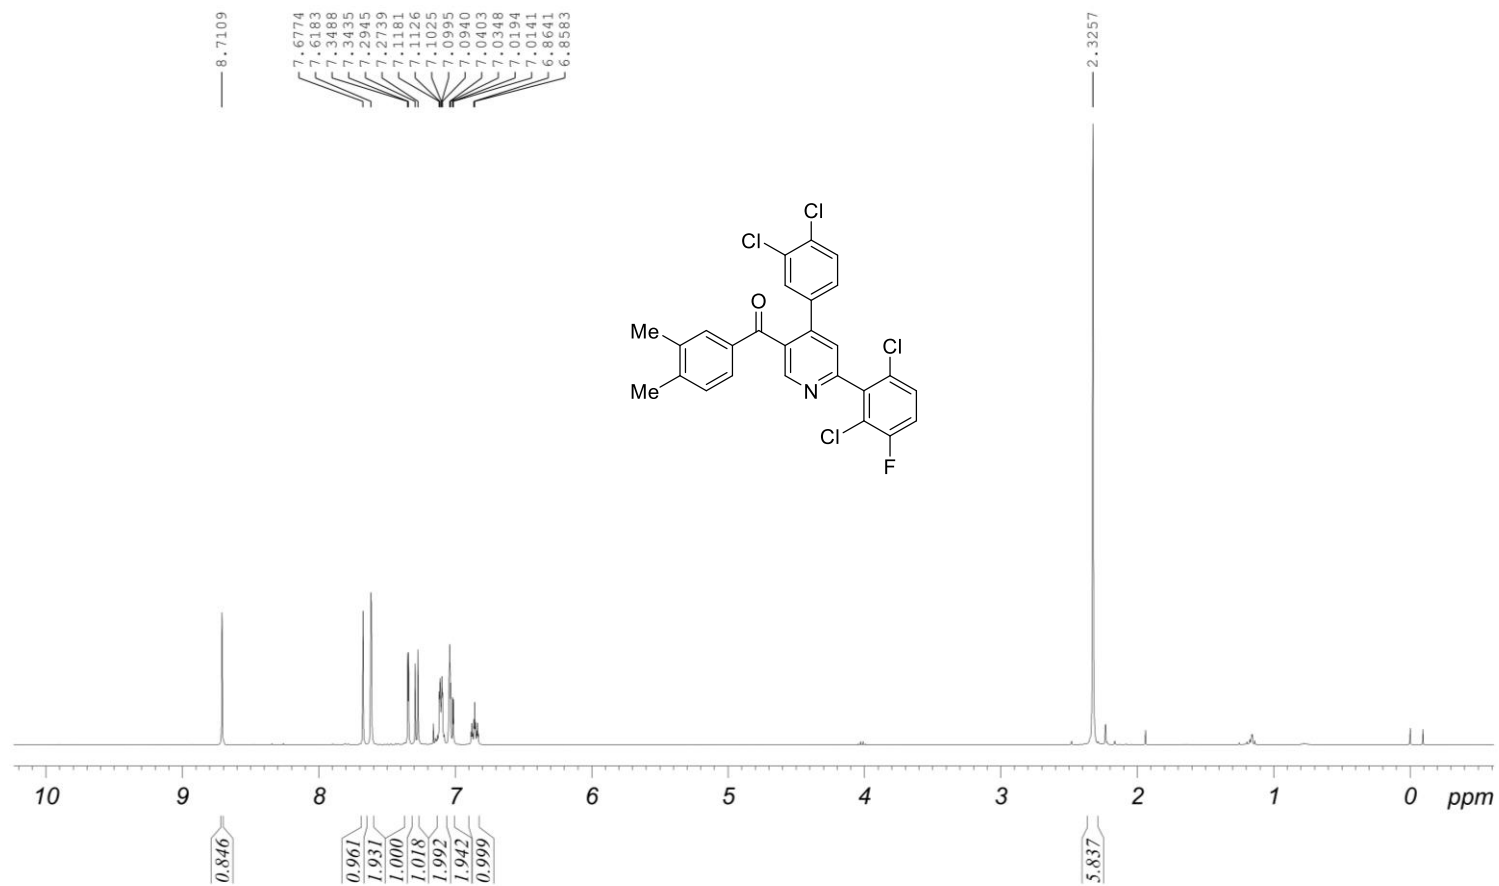

**Figure S79.** <sup>1</sup>H NMR (400 MHz, CDCl<sub>3</sub>) spectra of compound **3f'**

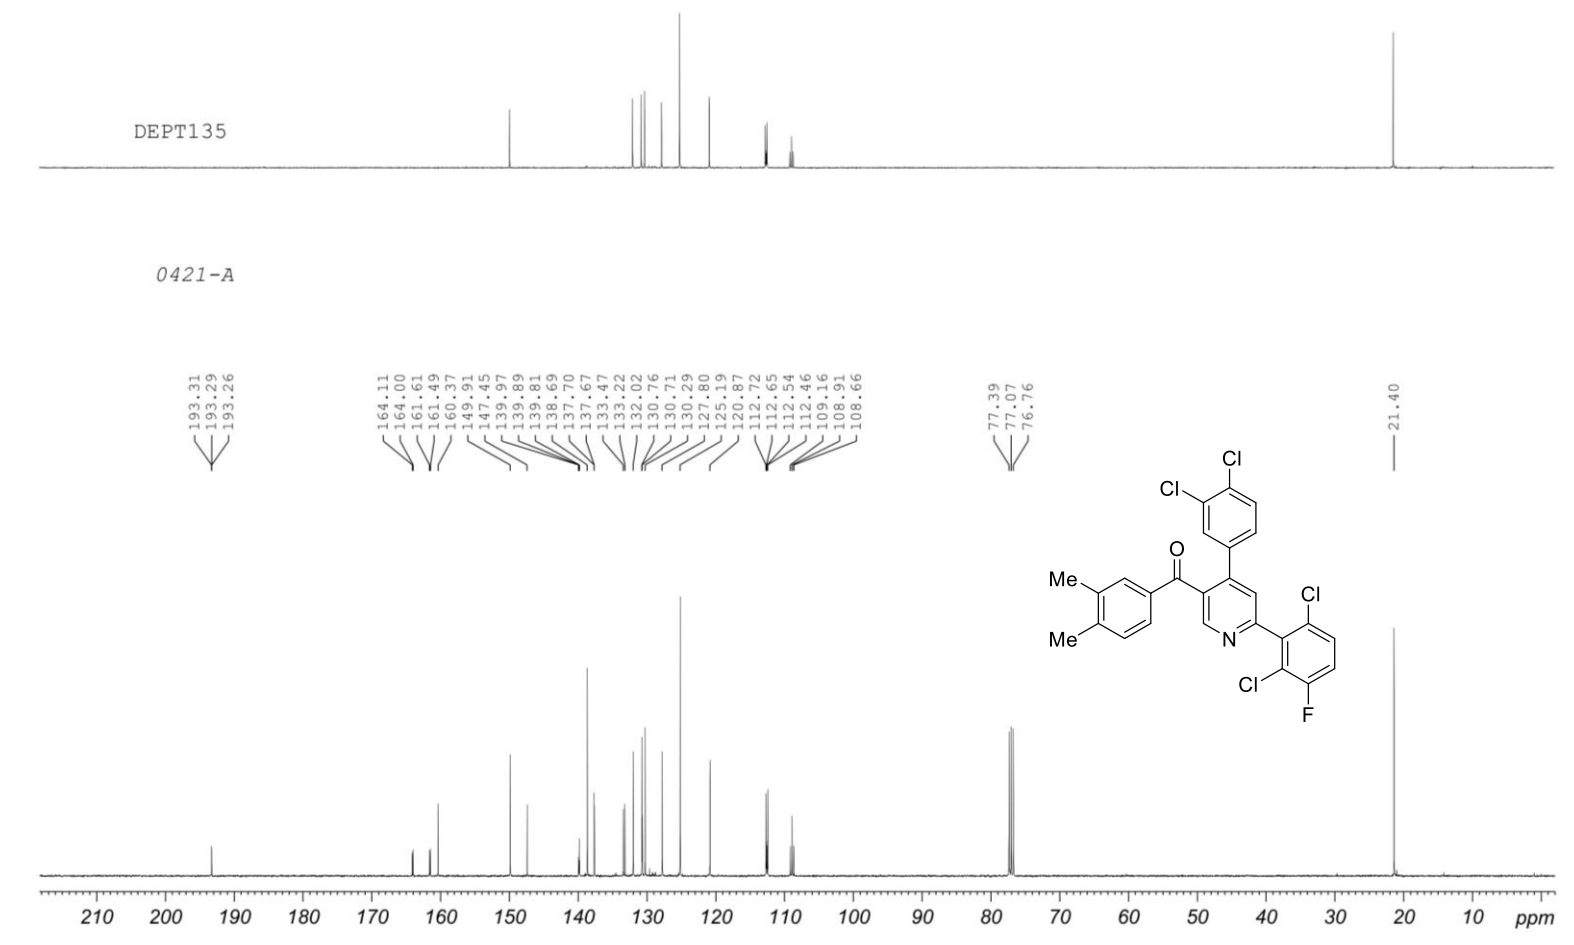

**Figure S80.**  $^{13}\text{C}$  NMR (100 MHz,  $\text{CDCl}_3$ ) spectra of compound **3f**

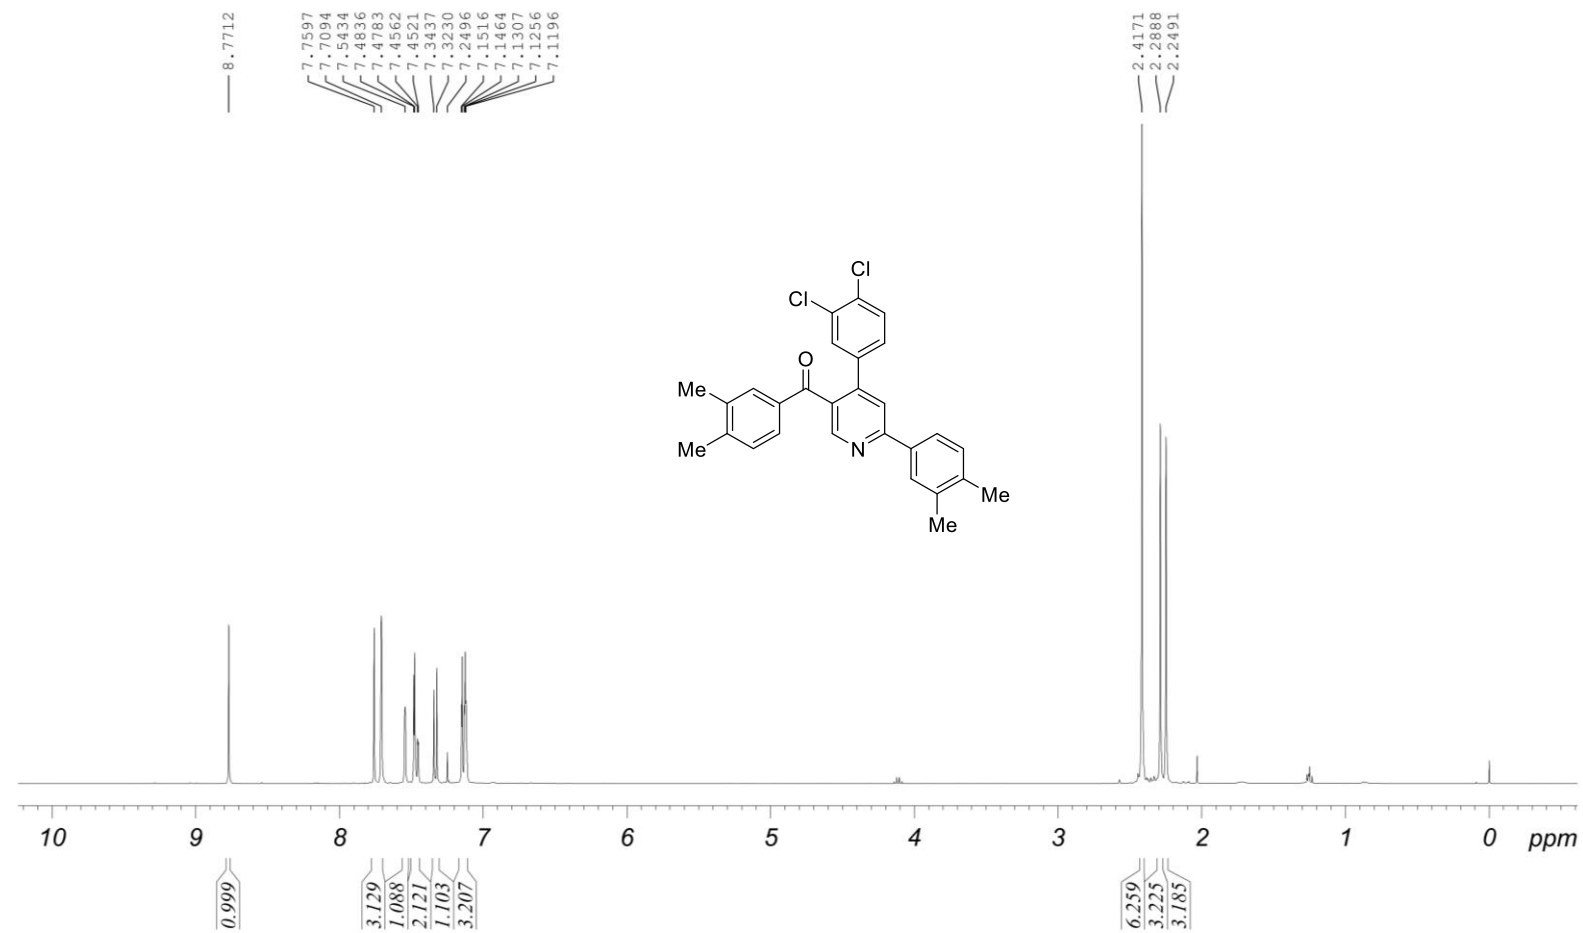

**Figure S81.** <sup>1</sup>H NMR (400 MHz, CDCl<sub>3</sub>) spectra of compound 3g'



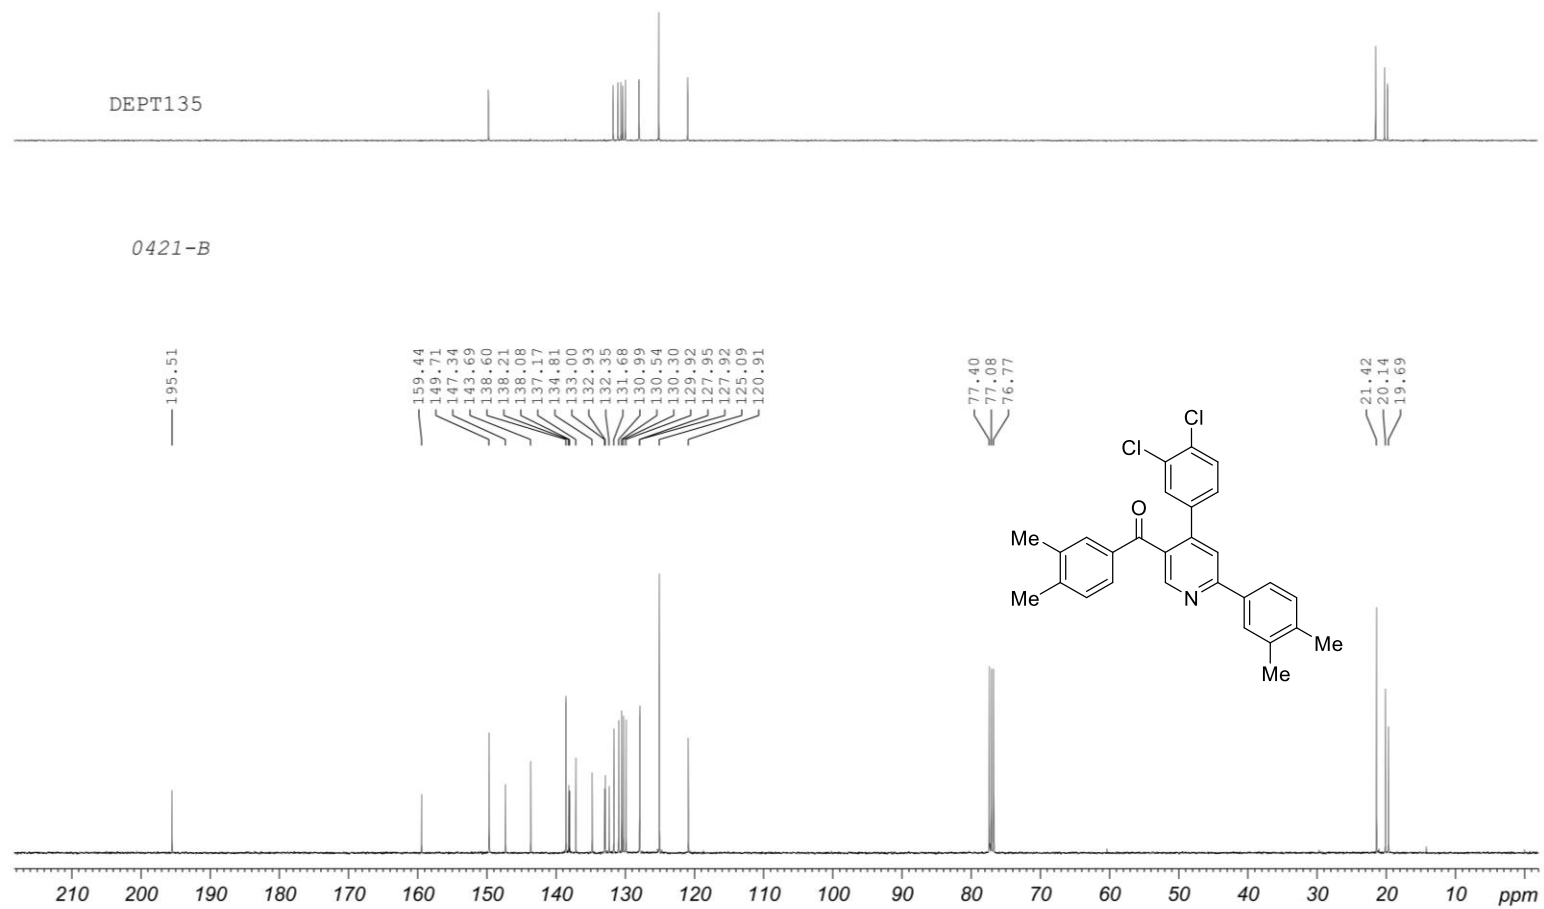

**Figure S82.** <sup>13</sup>C NMR (100 MHz, CDCl<sub>3</sub>) spectra of compound 3g'

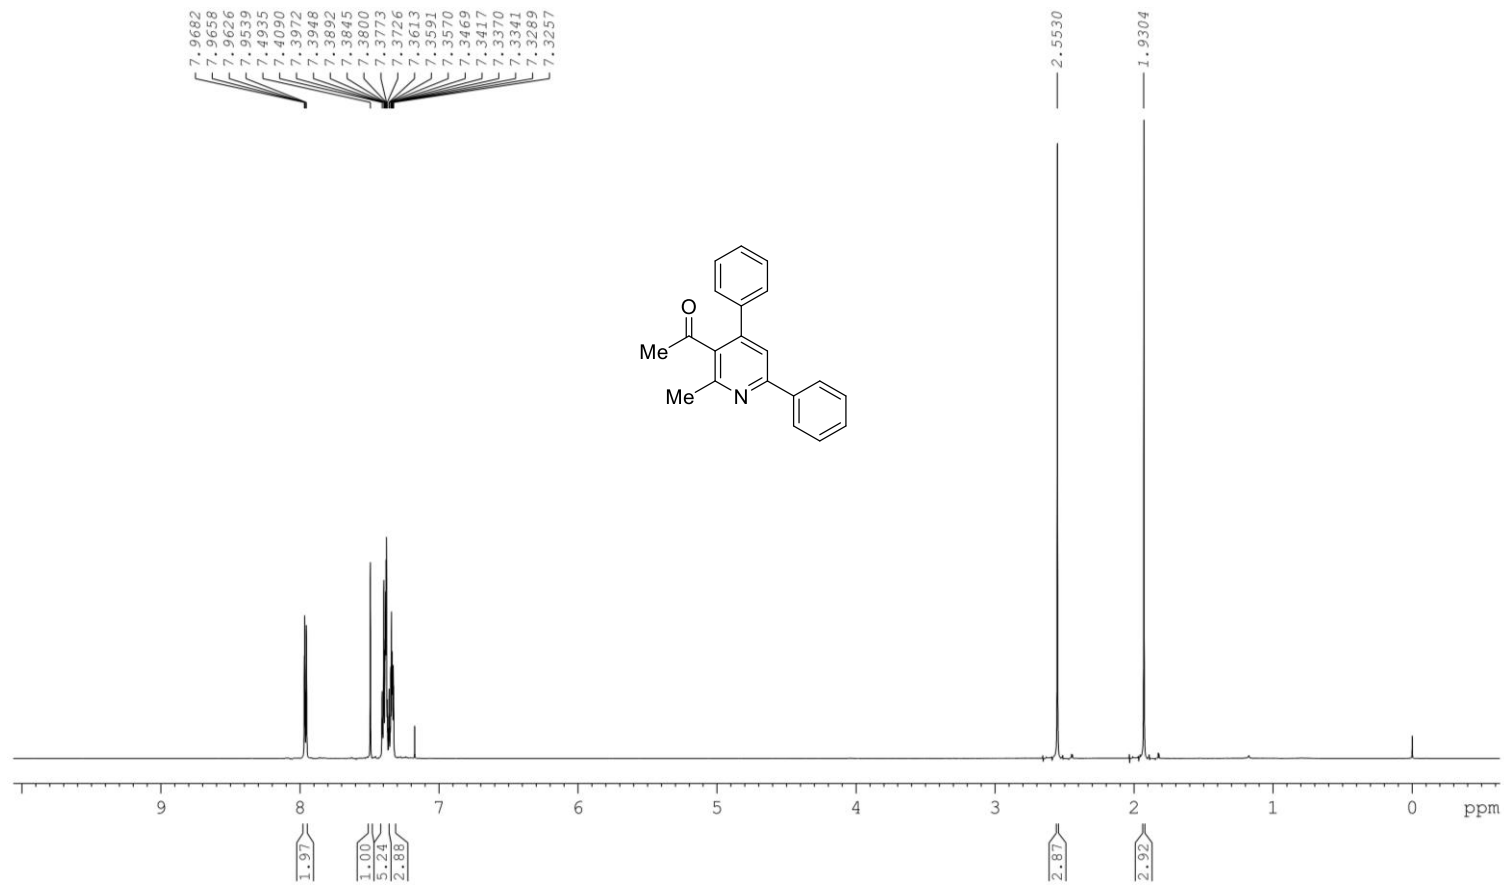

**Figure S83.** <sup>1</sup>H NMR (600 MHz, CDCl<sub>3</sub>) spectra of compound **3h'**

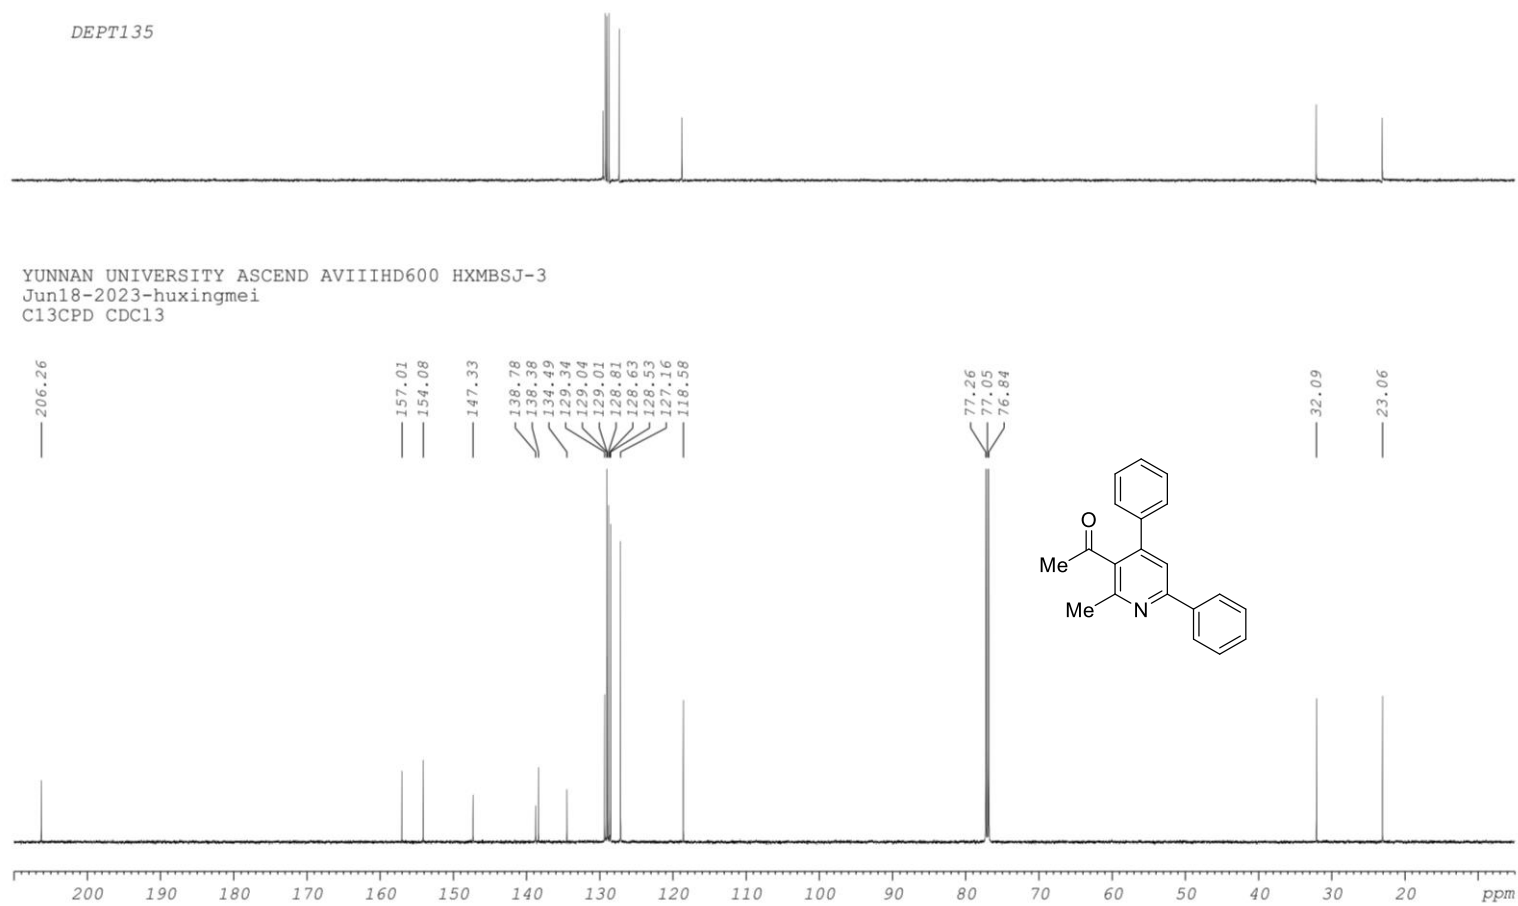

**Figure S84.**  $^{13}\text{C}$  NMR (150 MHz,  $\text{CDCl}_3$ ) spectra of compound **3h'**

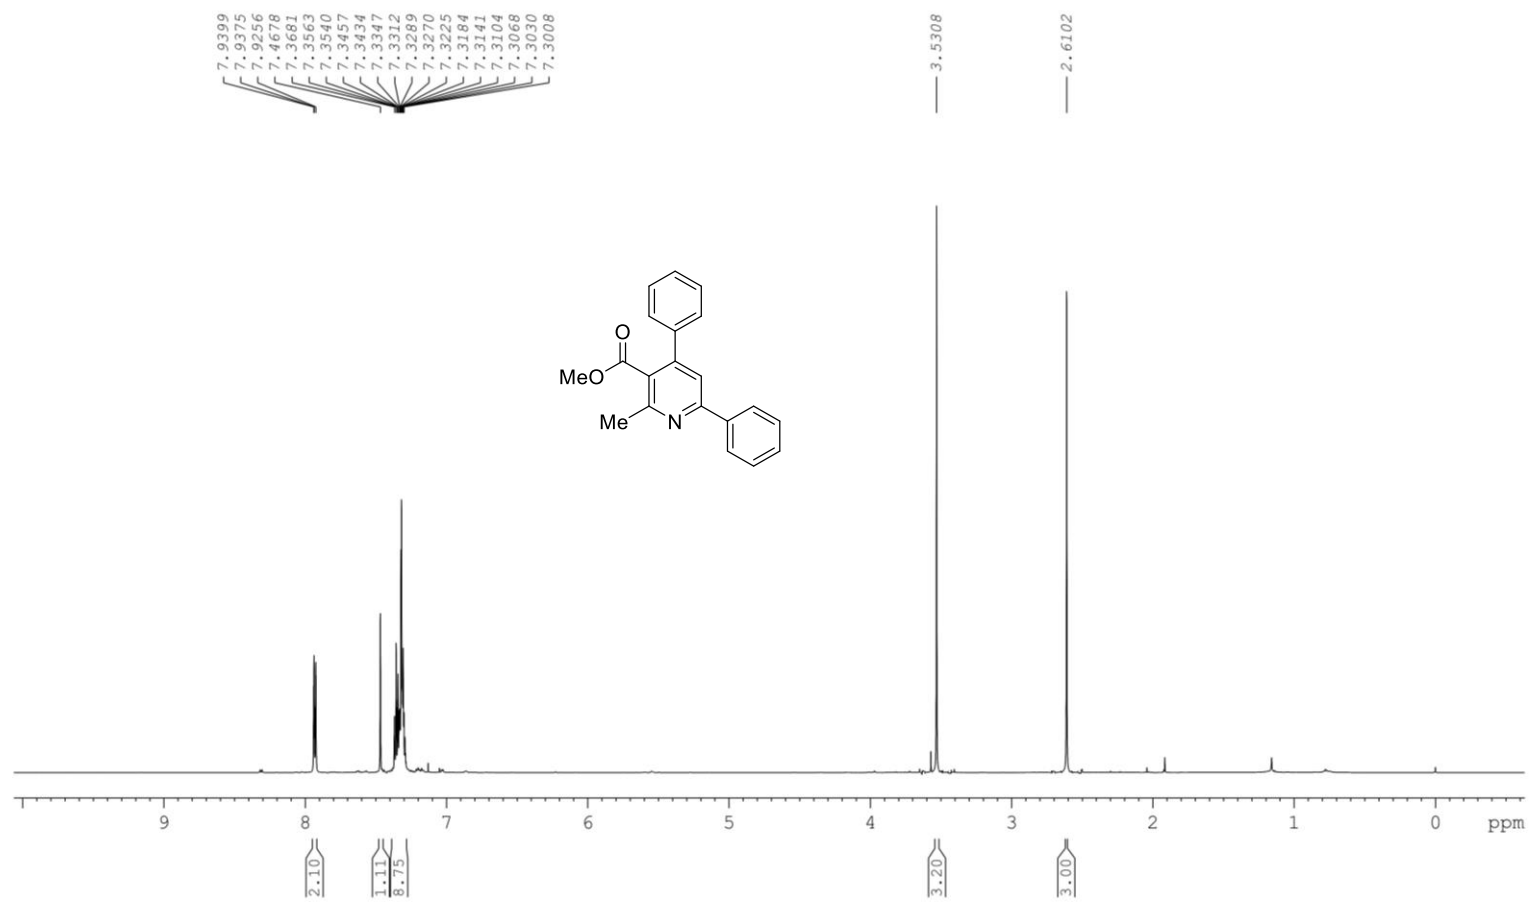

**Figure S85.**  $^1\text{H NMR}$  (600 MHz,  $\text{CDCl}_3$ ) spectra of compound **3i'**

DEPT135

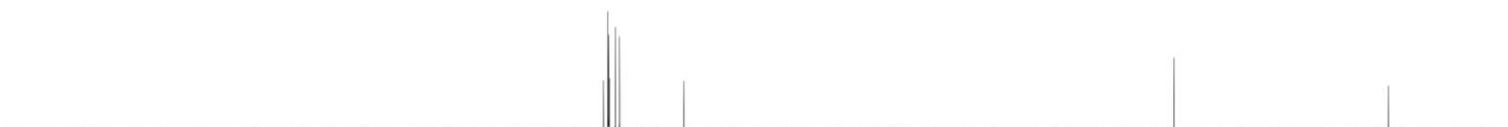

YUNNAN UNIVERSITY ASCEND AVIIIHD600 HXMSBJ-7  
Jun18-2023-huxingmei  
C13CPD CDCl3

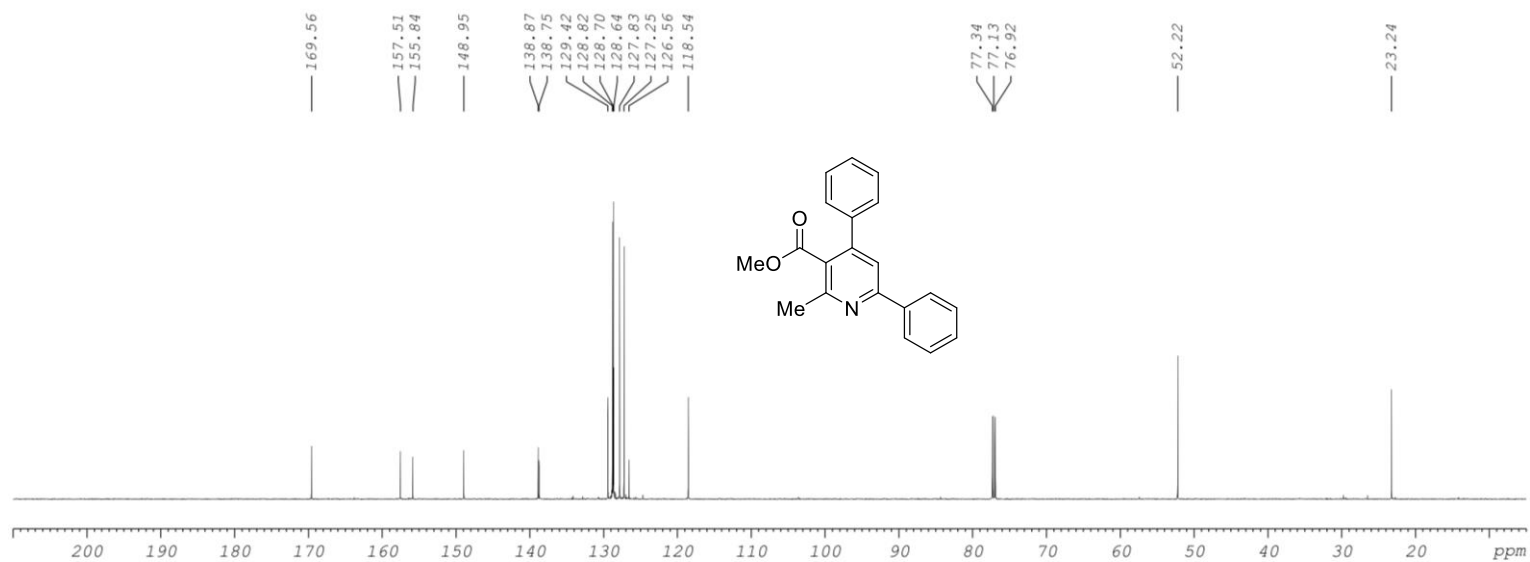

Figure S86. <sup>13</sup>C NMR (150 MHz, CDCl<sub>3</sub>) spectra of compound 3i'

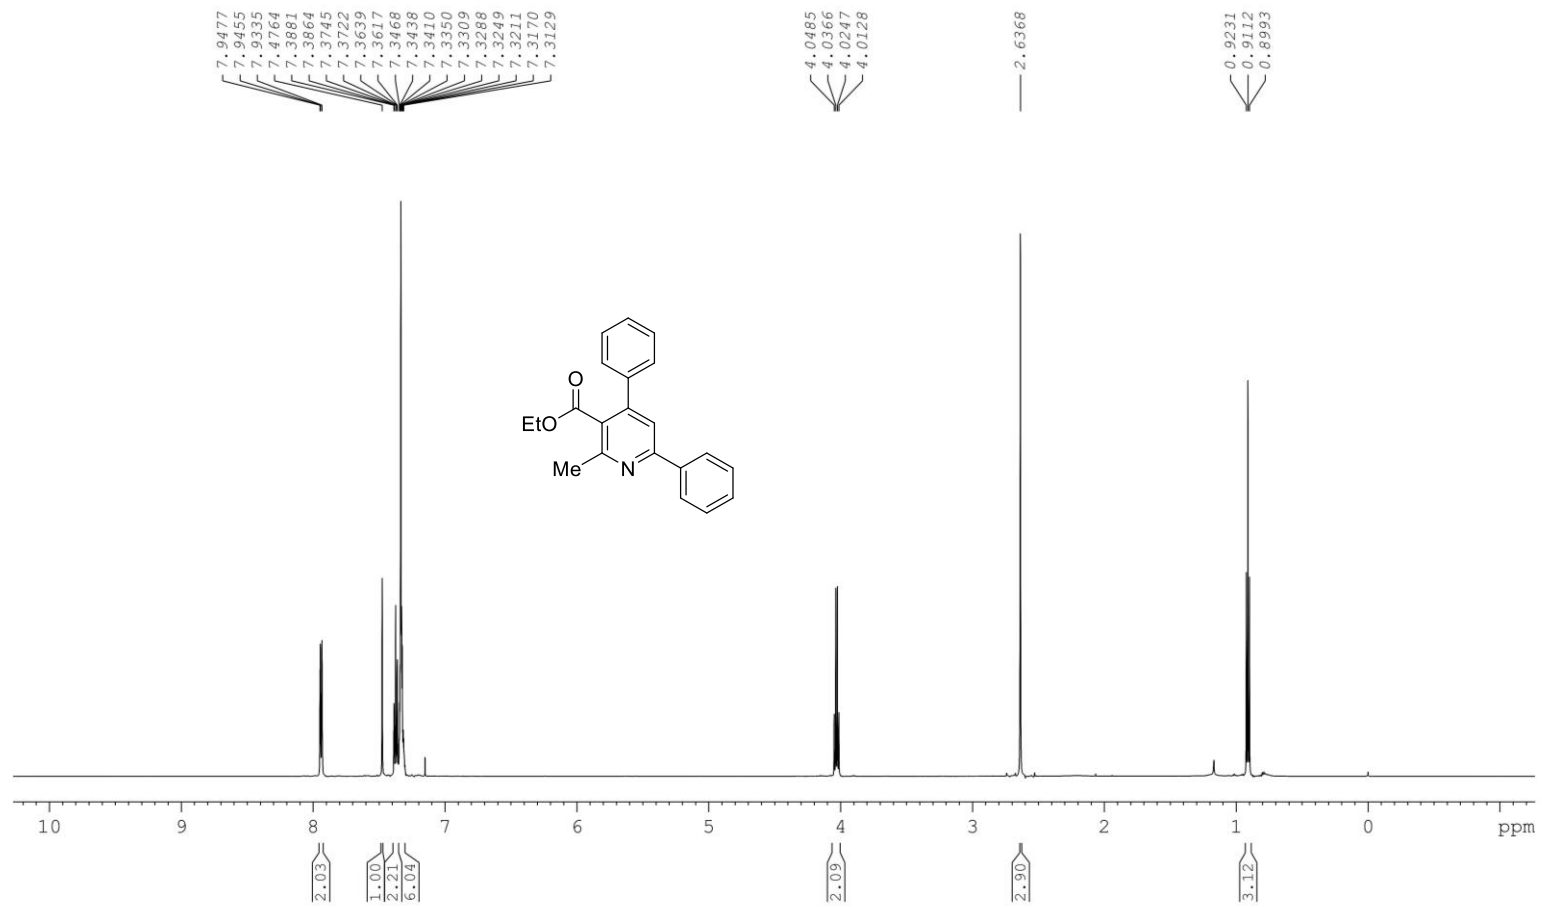

**Figure S87.** <sup>1</sup>H NMR (600 MHz, CDCl<sub>3</sub>) spectra of compound **3j'**

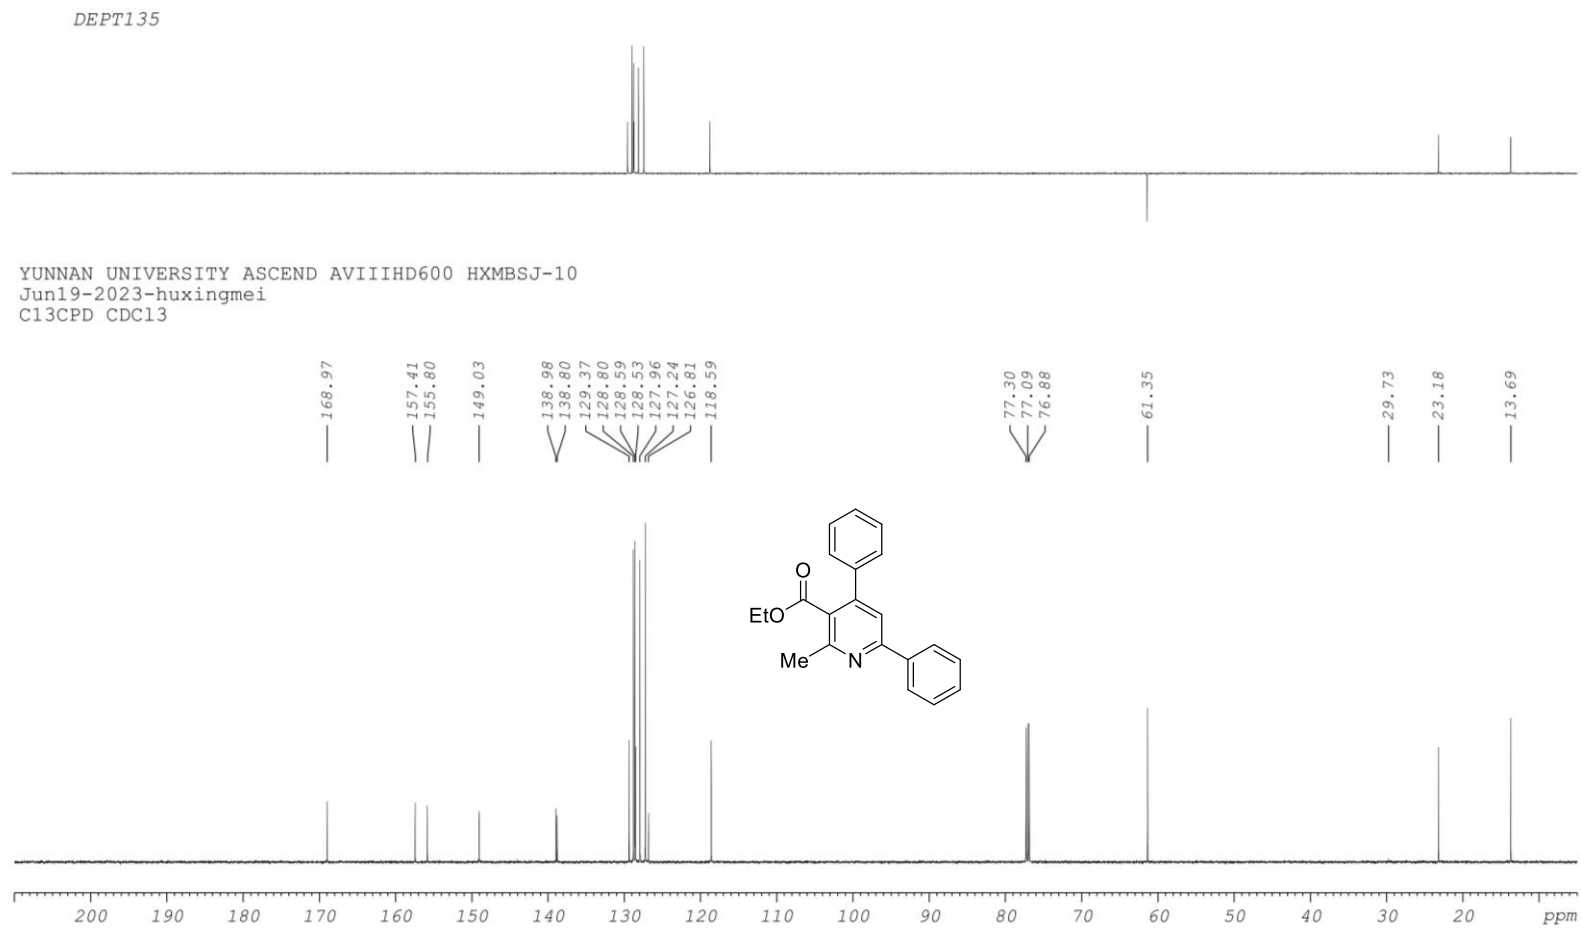

Figure S88.  $^{13}\text{C}$  NMR (150 MHz,  $\text{CDCl}_3$ ) spectra of compound **3j'**

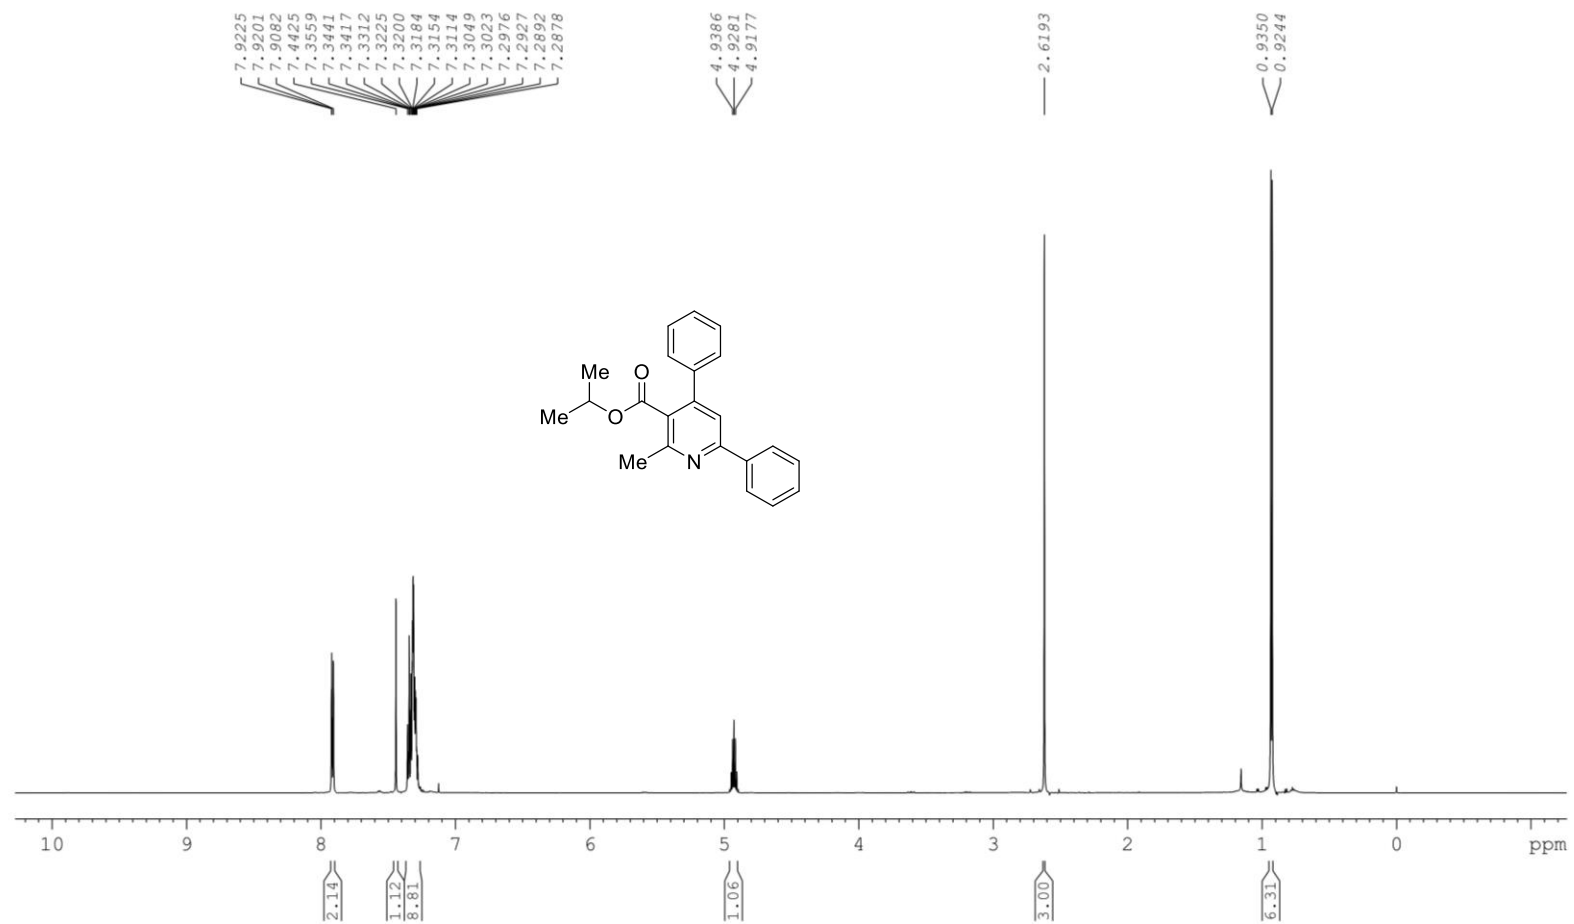

**Figure S89.**  $^1\text{H}$  NMR (600 MHz,  $\text{CDCl}_3$ ) spectra of compound **3k'**



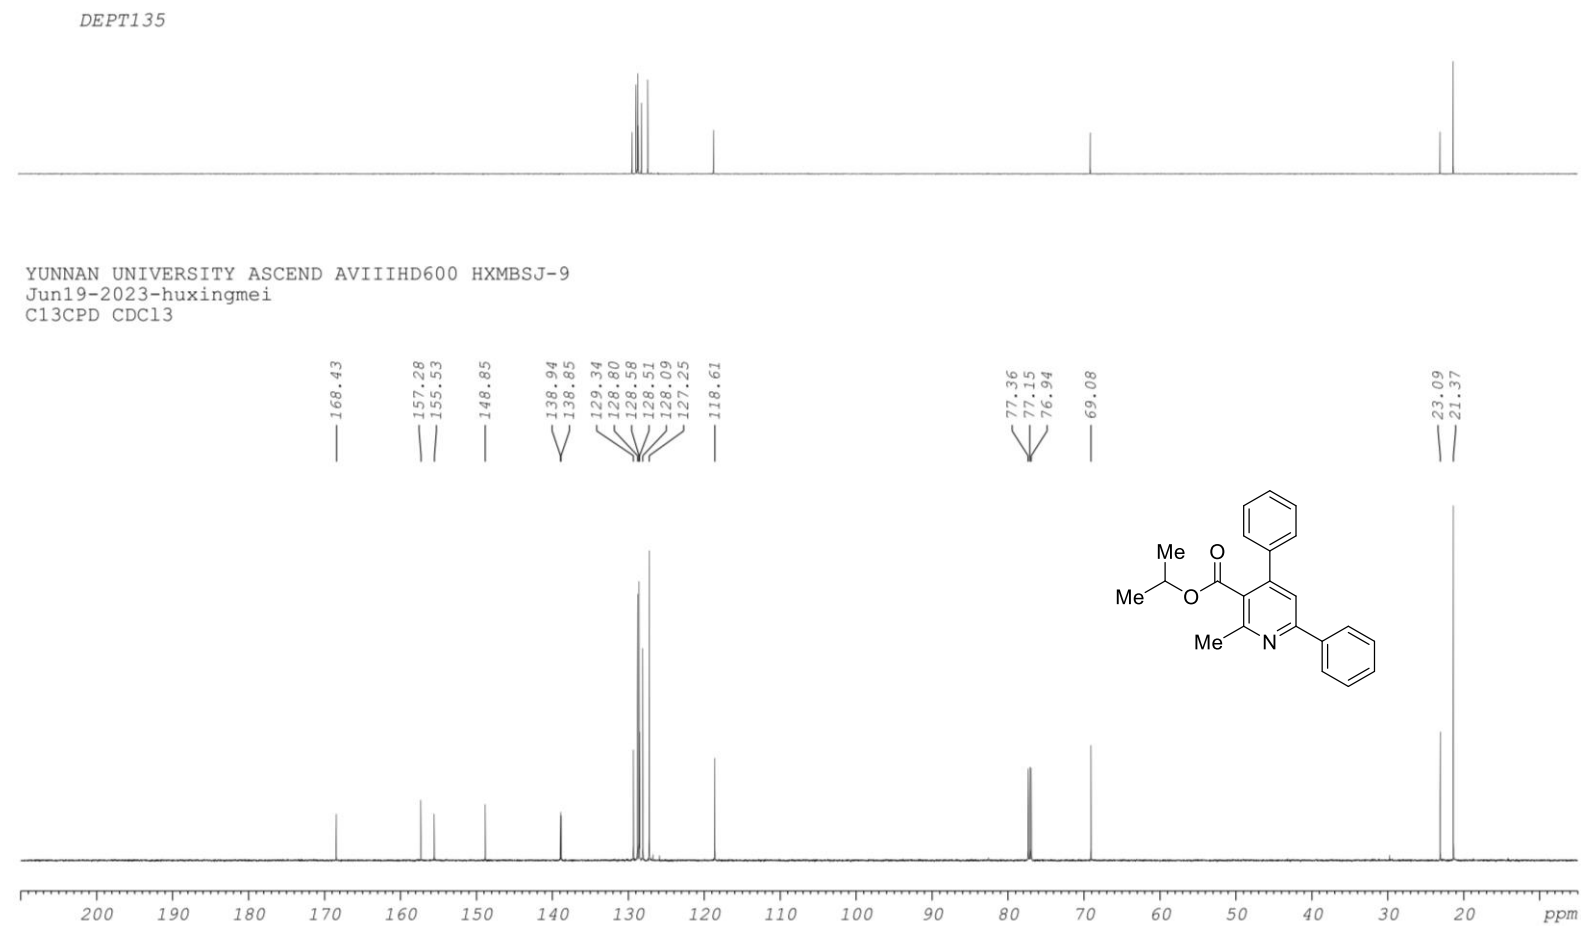

**Figure S90.**  $^{13}\text{C}$  NMR (150 MHz,  $\text{CDCl}_3$ ) spectra of compound **3k'**

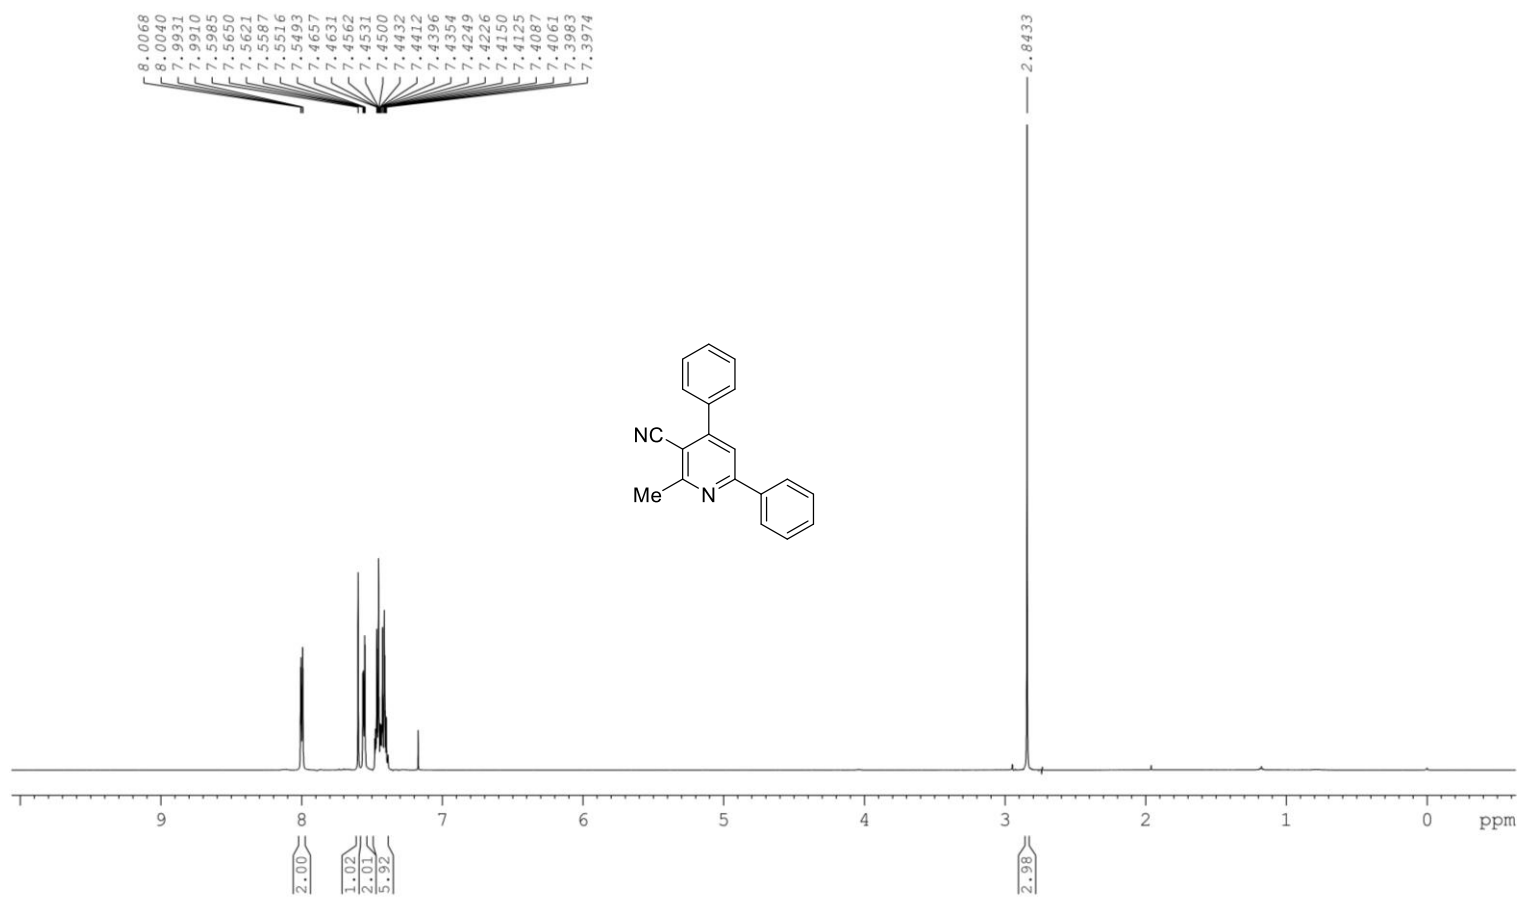

**Figure S91.** <sup>1</sup>H NMR (600 MHz, CDCl<sub>3</sub>) spectra of compound 31'

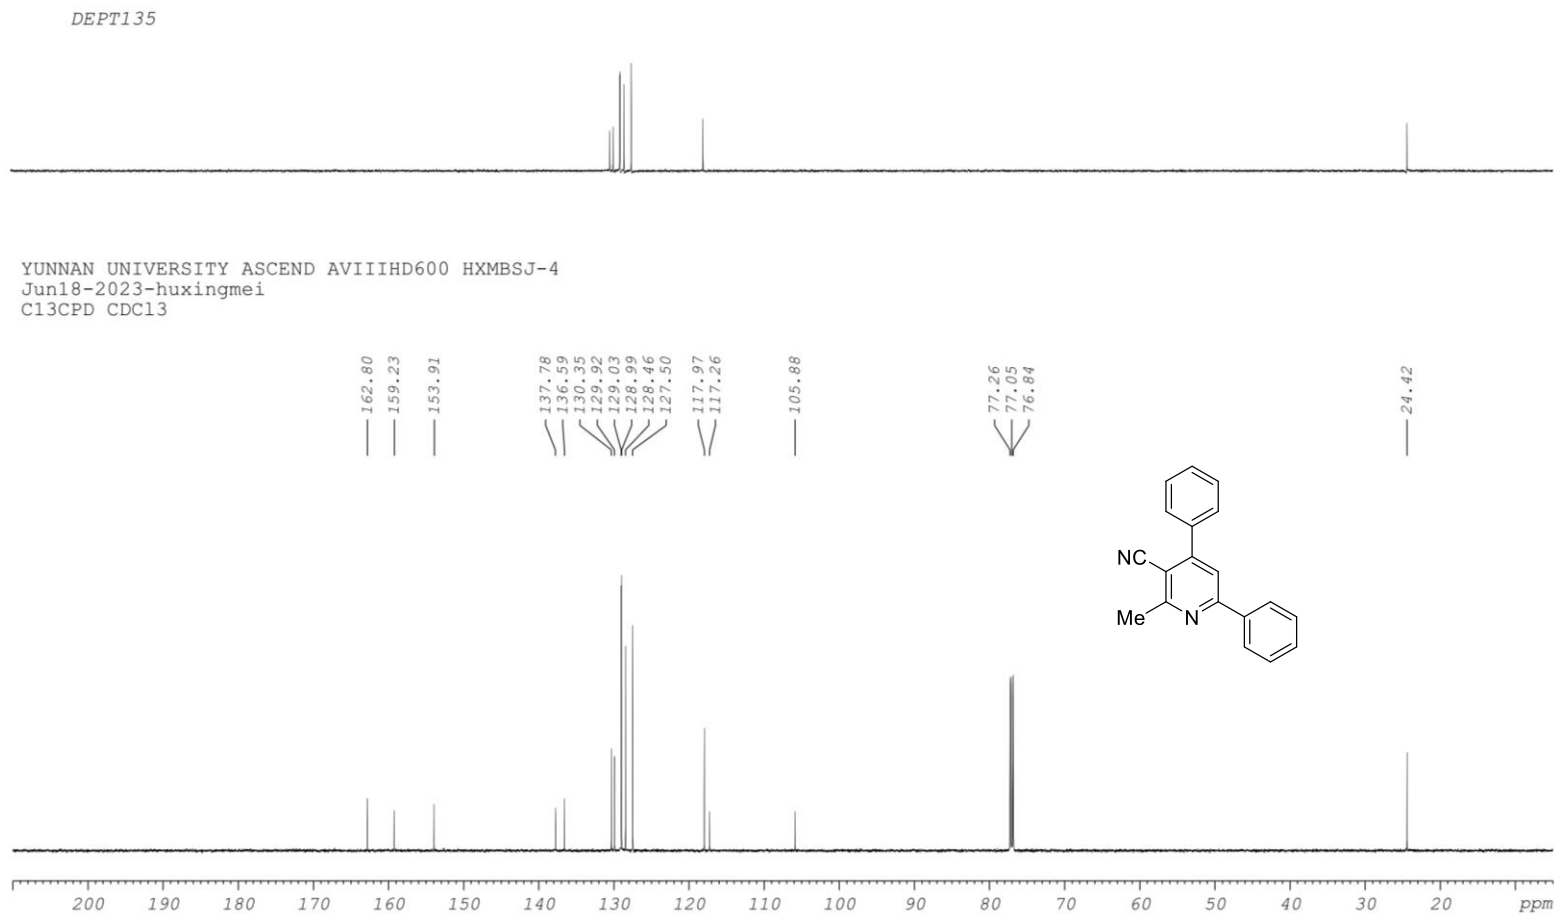

Figure S92. <sup>13</sup>C NMR (150 MHz, CDCl<sub>3</sub>) spectra of compound 31'

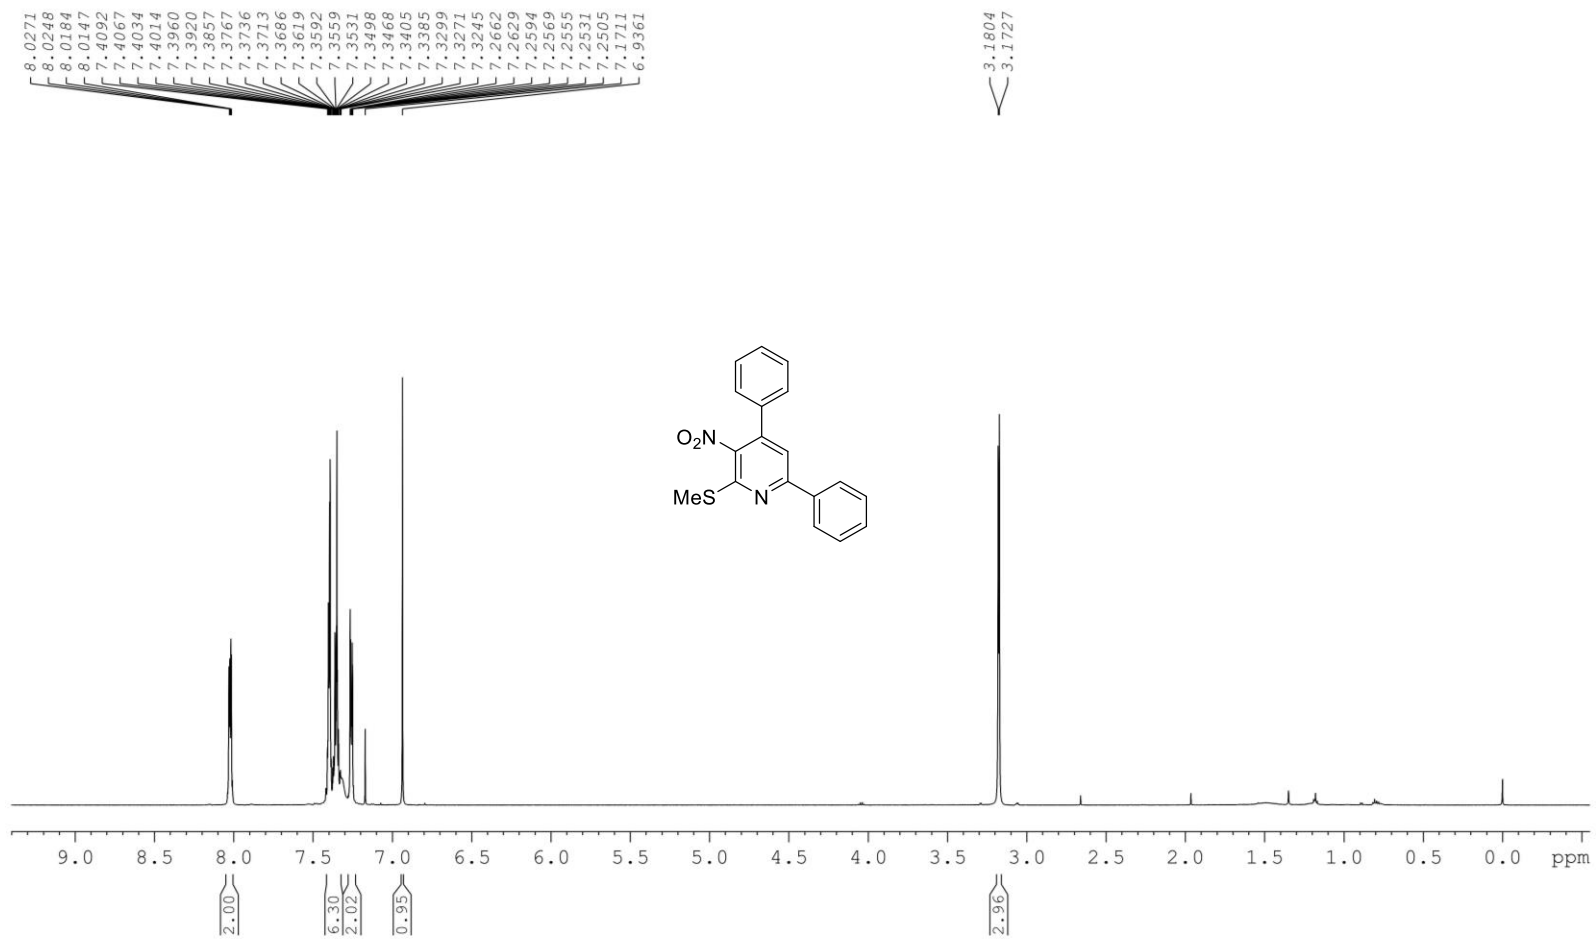

**Figure S93.** <sup>1</sup>H NMR (600 MHz, CDCl<sub>3</sub>) spectra of compound **3m'**

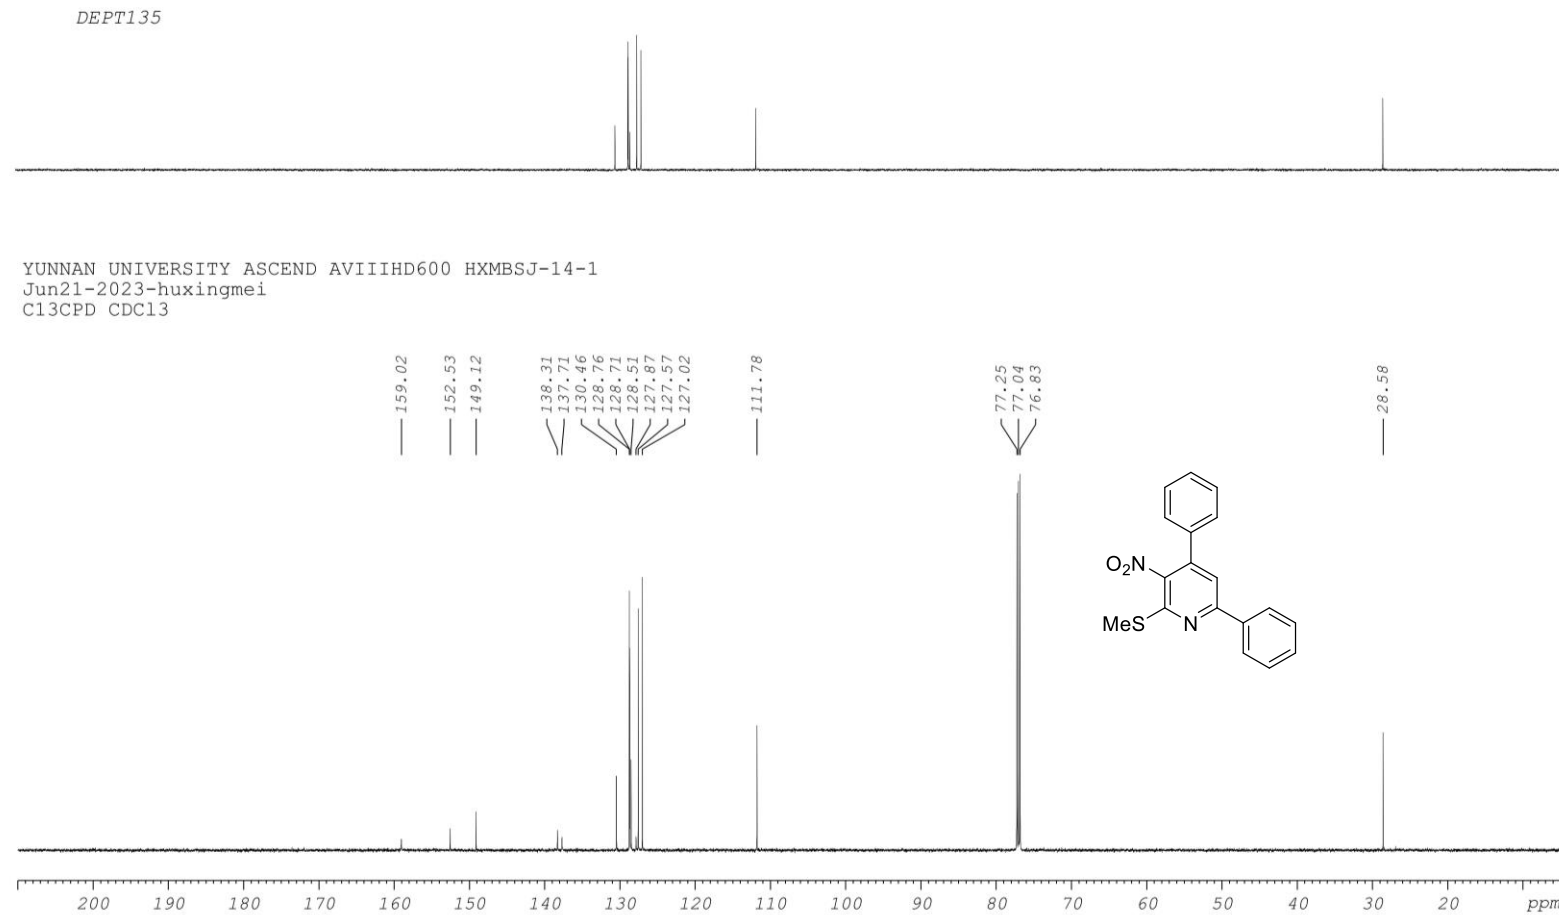

**Figure S94.**  $^{13}\text{C}$  NMR (150 MHz,  $\text{CDCl}_3$ ) spectra of compound **3m'**

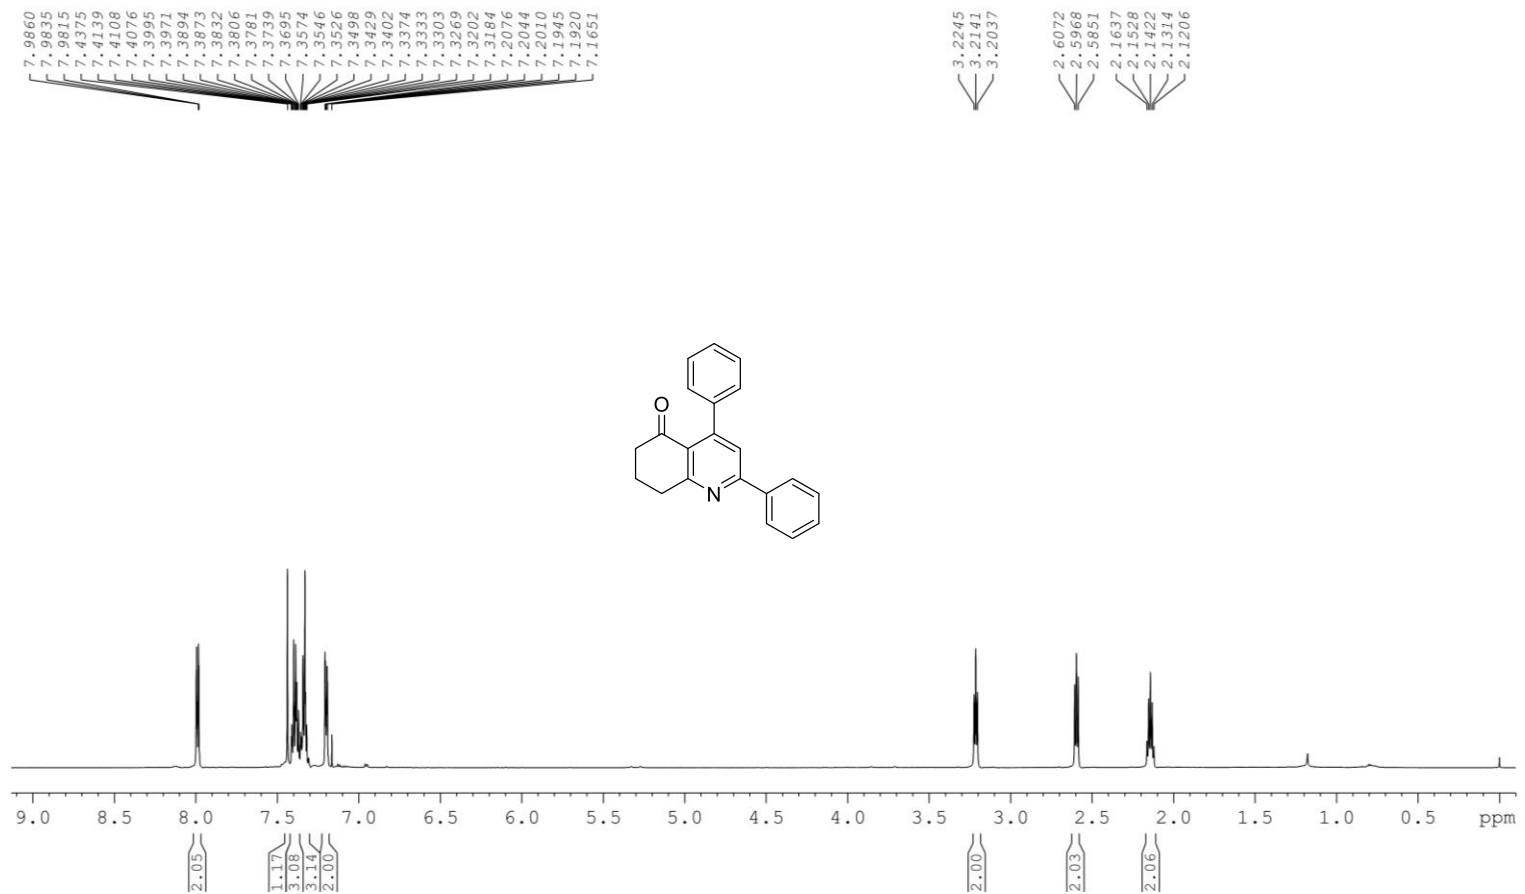

**Figure S95.**  $^1\text{H}$  NMR (600 MHz,  $\text{CDCl}_3$ ) spectra of compound **3n'**

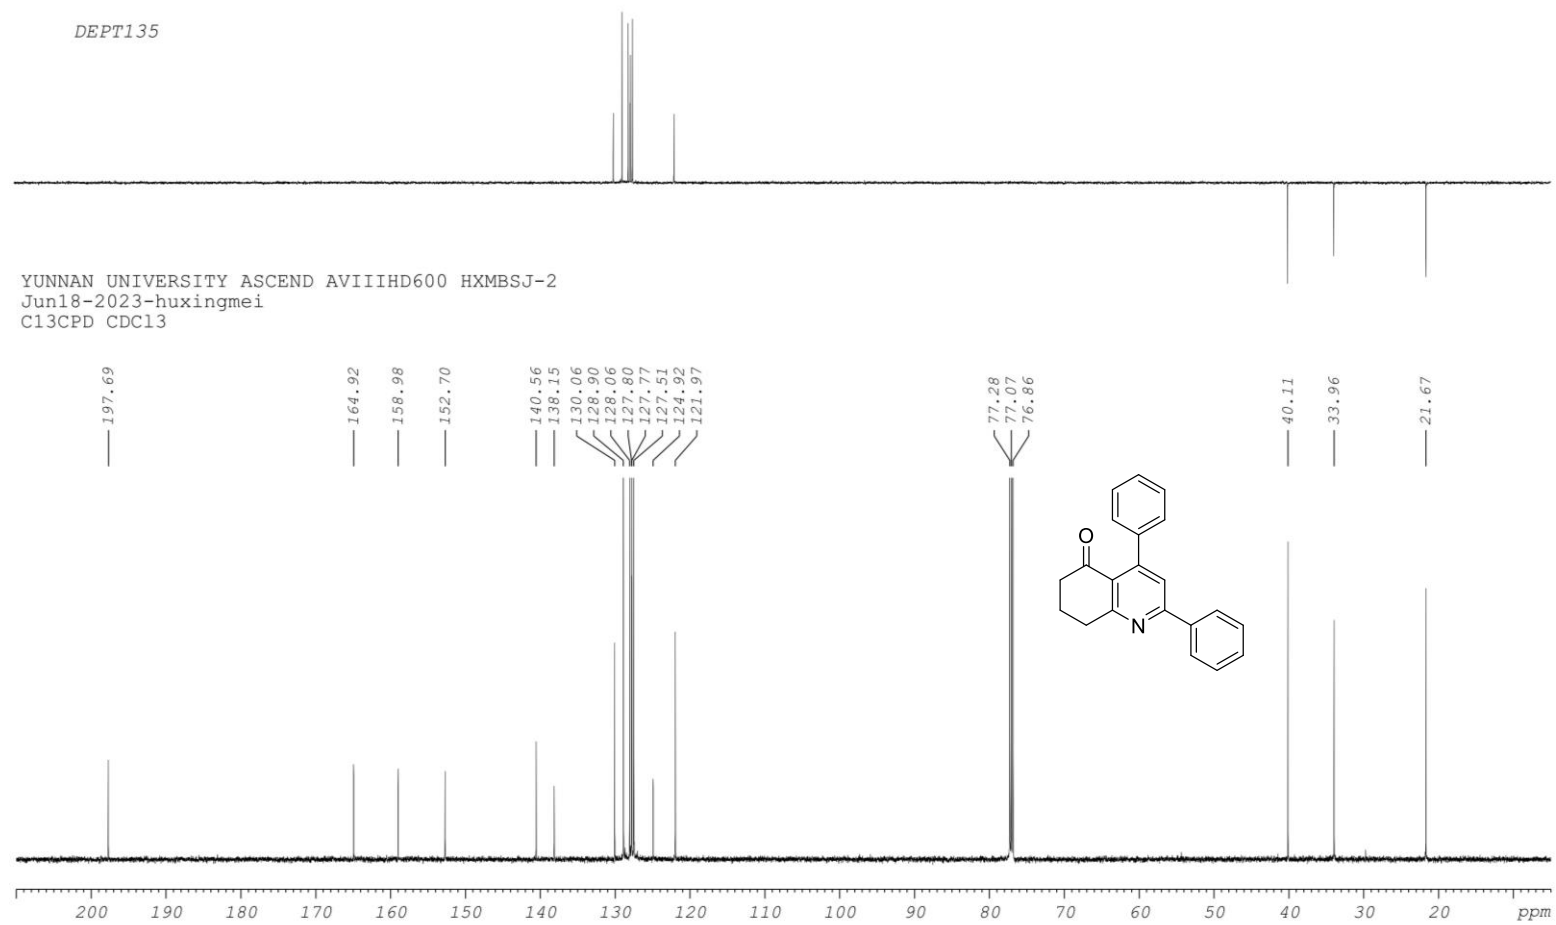

**Figure S96.**  $^{13}\text{C}$  NMR (150 MHz,  $\text{CDCl}_3$ ) spectra of compound **3n'**

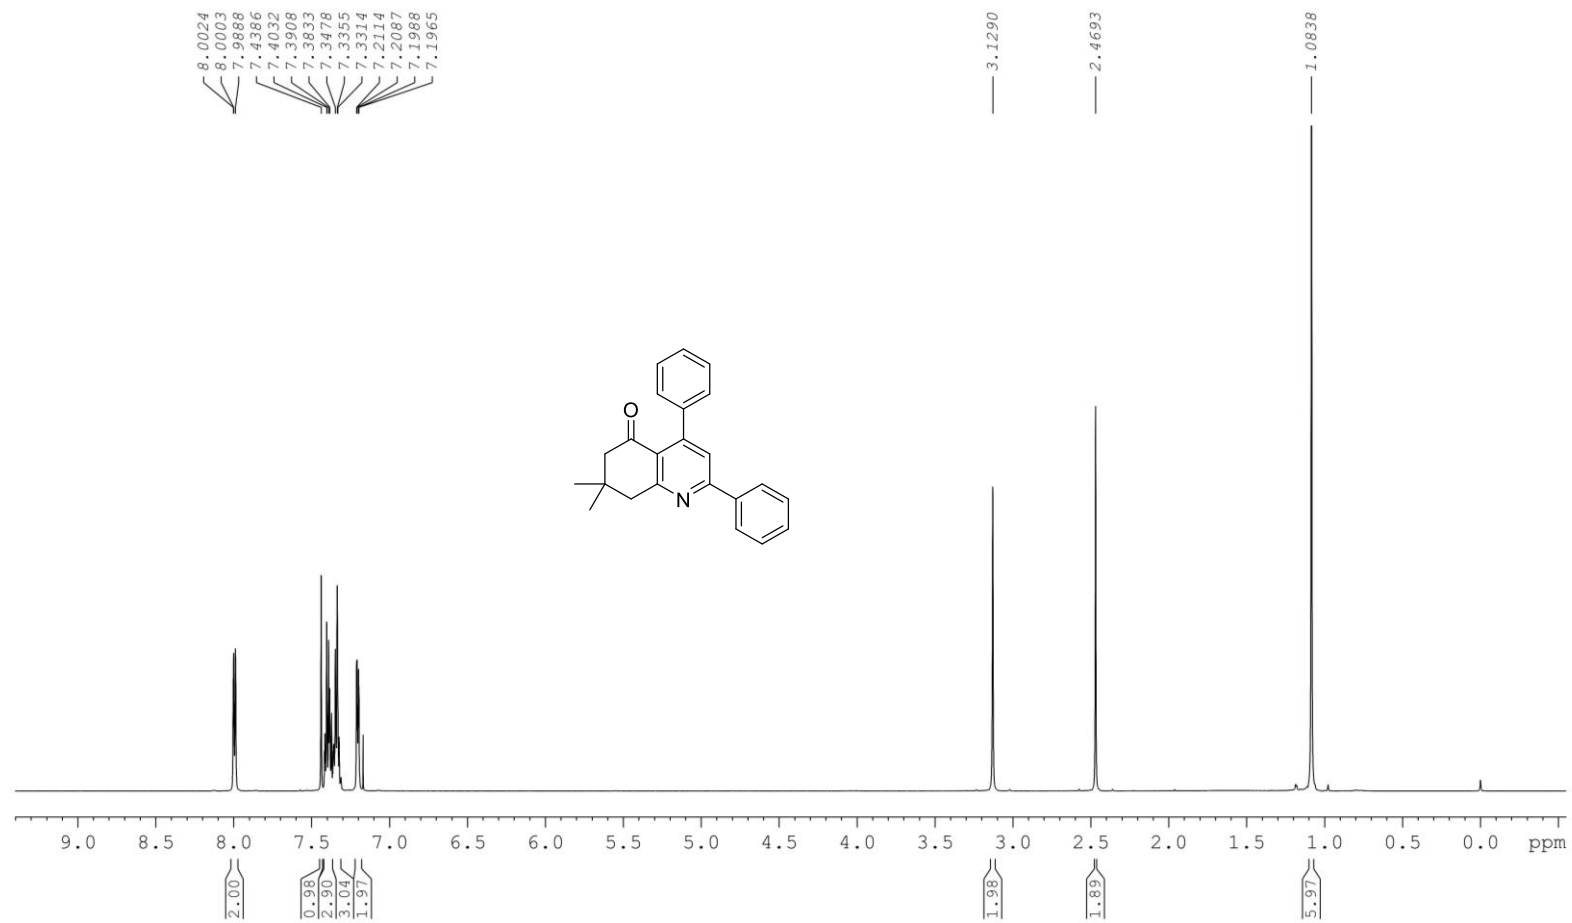

**Figure S97.** <sup>1</sup>H NMR (600 MHz, CDCl<sub>3</sub>) spectra of compound 30'



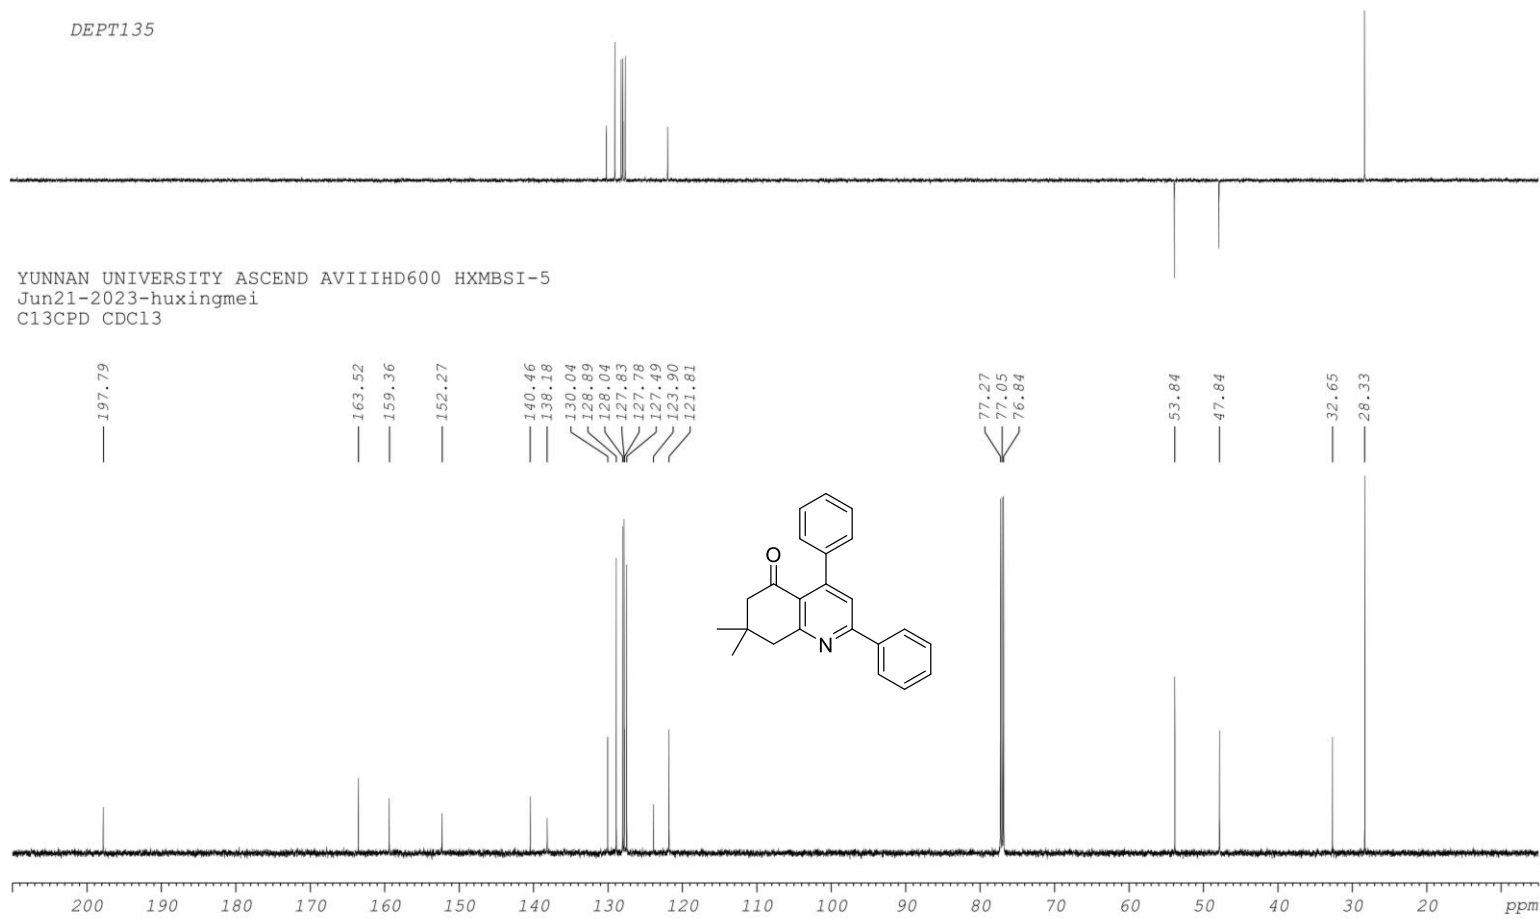

**Figure S98.**  $^{13}\text{C}$  NMR (150 MHz,  $\text{CDCl}_3$ ) spectra of compound **30'**

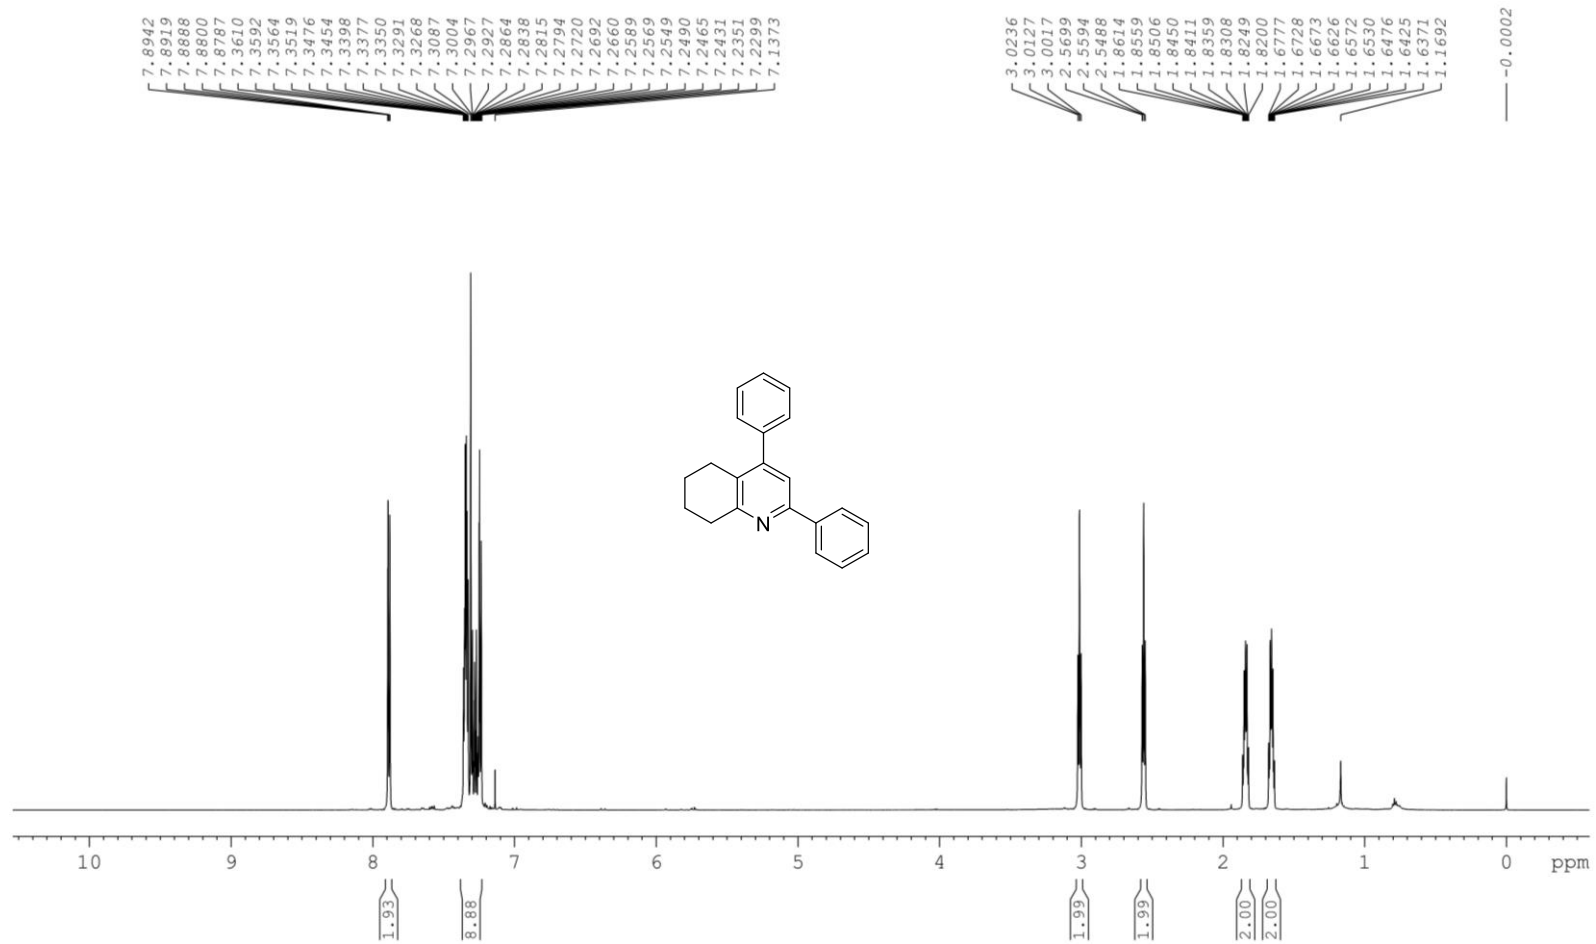

**Figure S99.** <sup>1</sup>H NMR (600 MHz, CDCl<sub>3</sub>) spectra of compound **3p'**

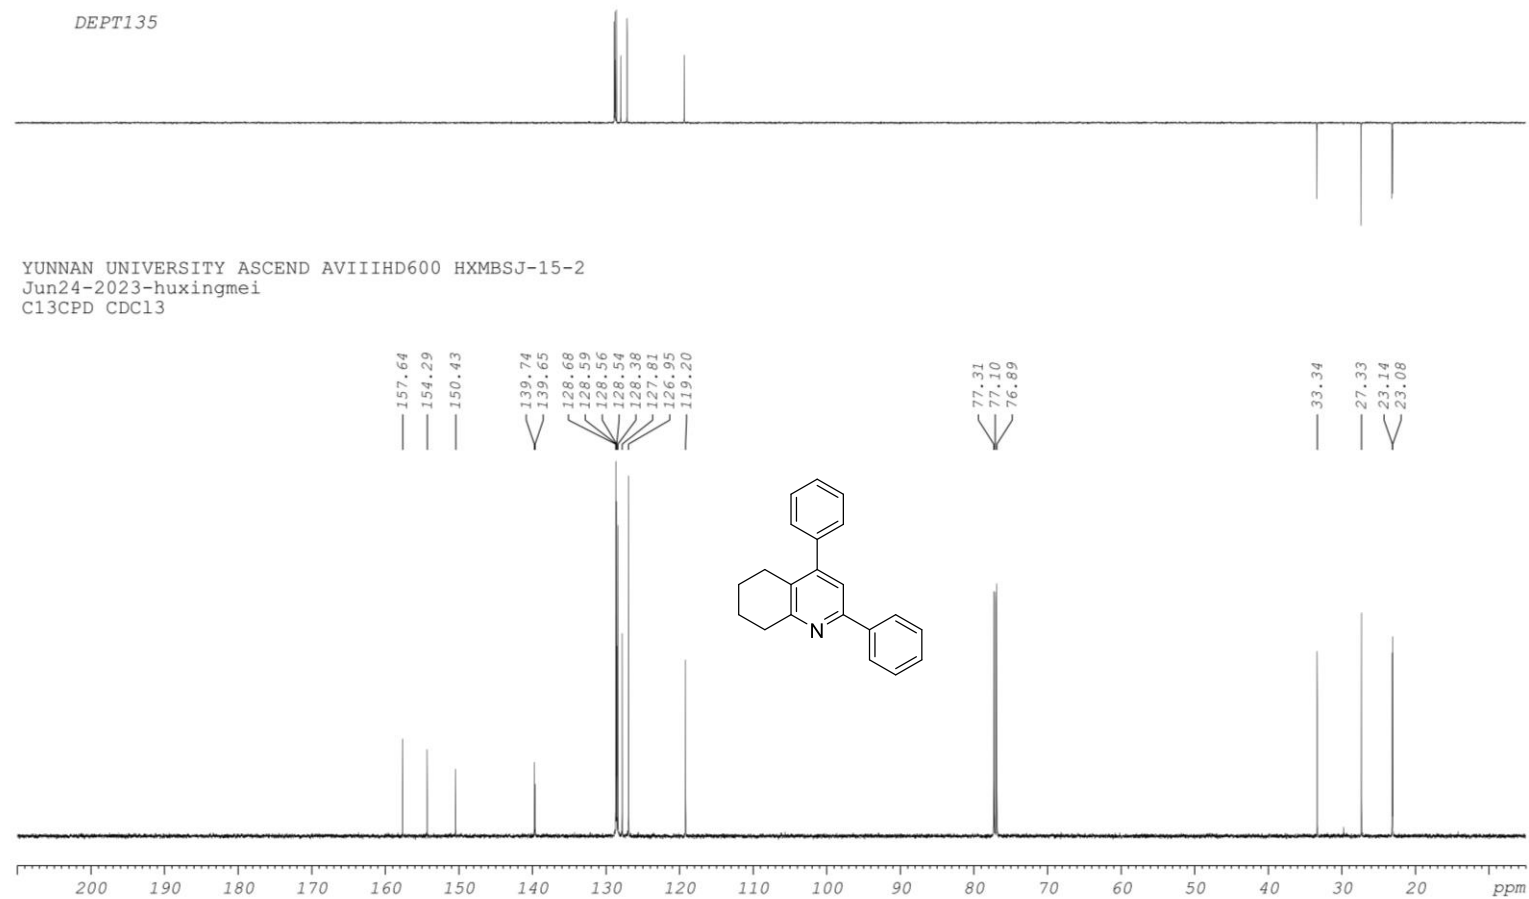

Figure S100.  $^{13}\text{C}$  NMR (150 MHz,  $\text{CDCl}_3$ ) spectra of compound **3p'**

RT: 0.00 - 3.50

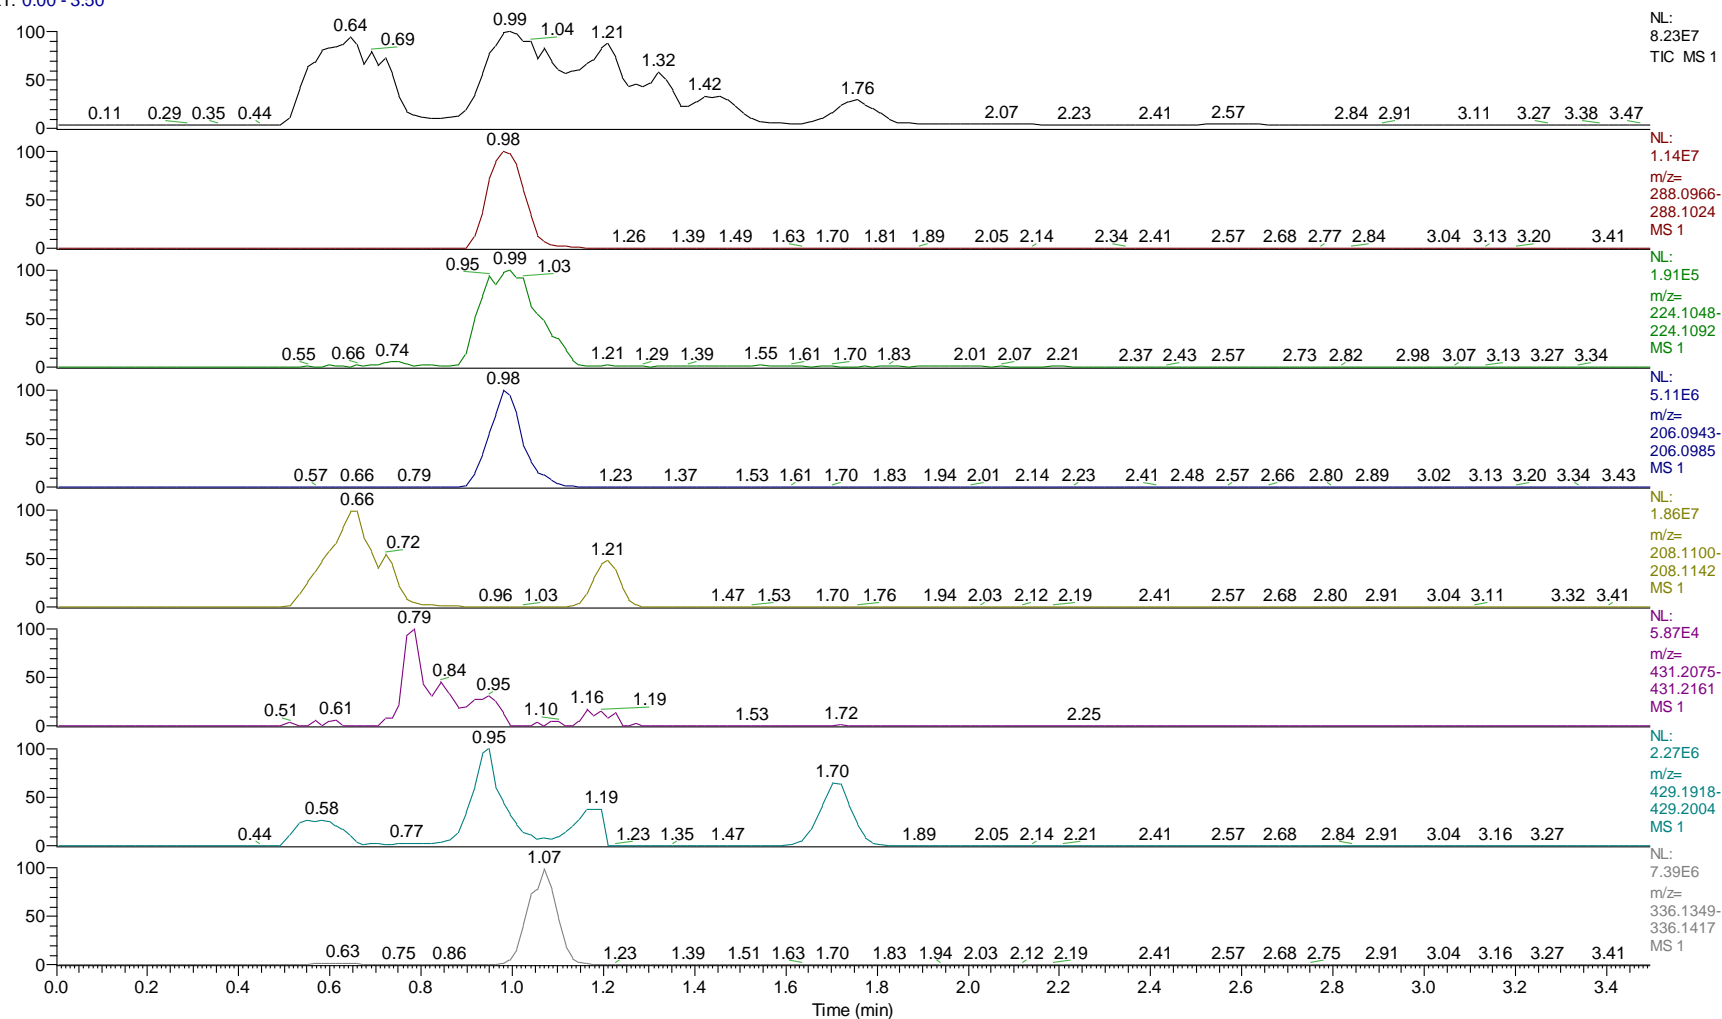

Figure S101. HPLC extracted ion flow diagrams of the reaction mixture

1 #52 RT: 0.98 AV: 1 NL: 1.14E7  
T: FTMS + c ESI Full ms [100.00-800.00]

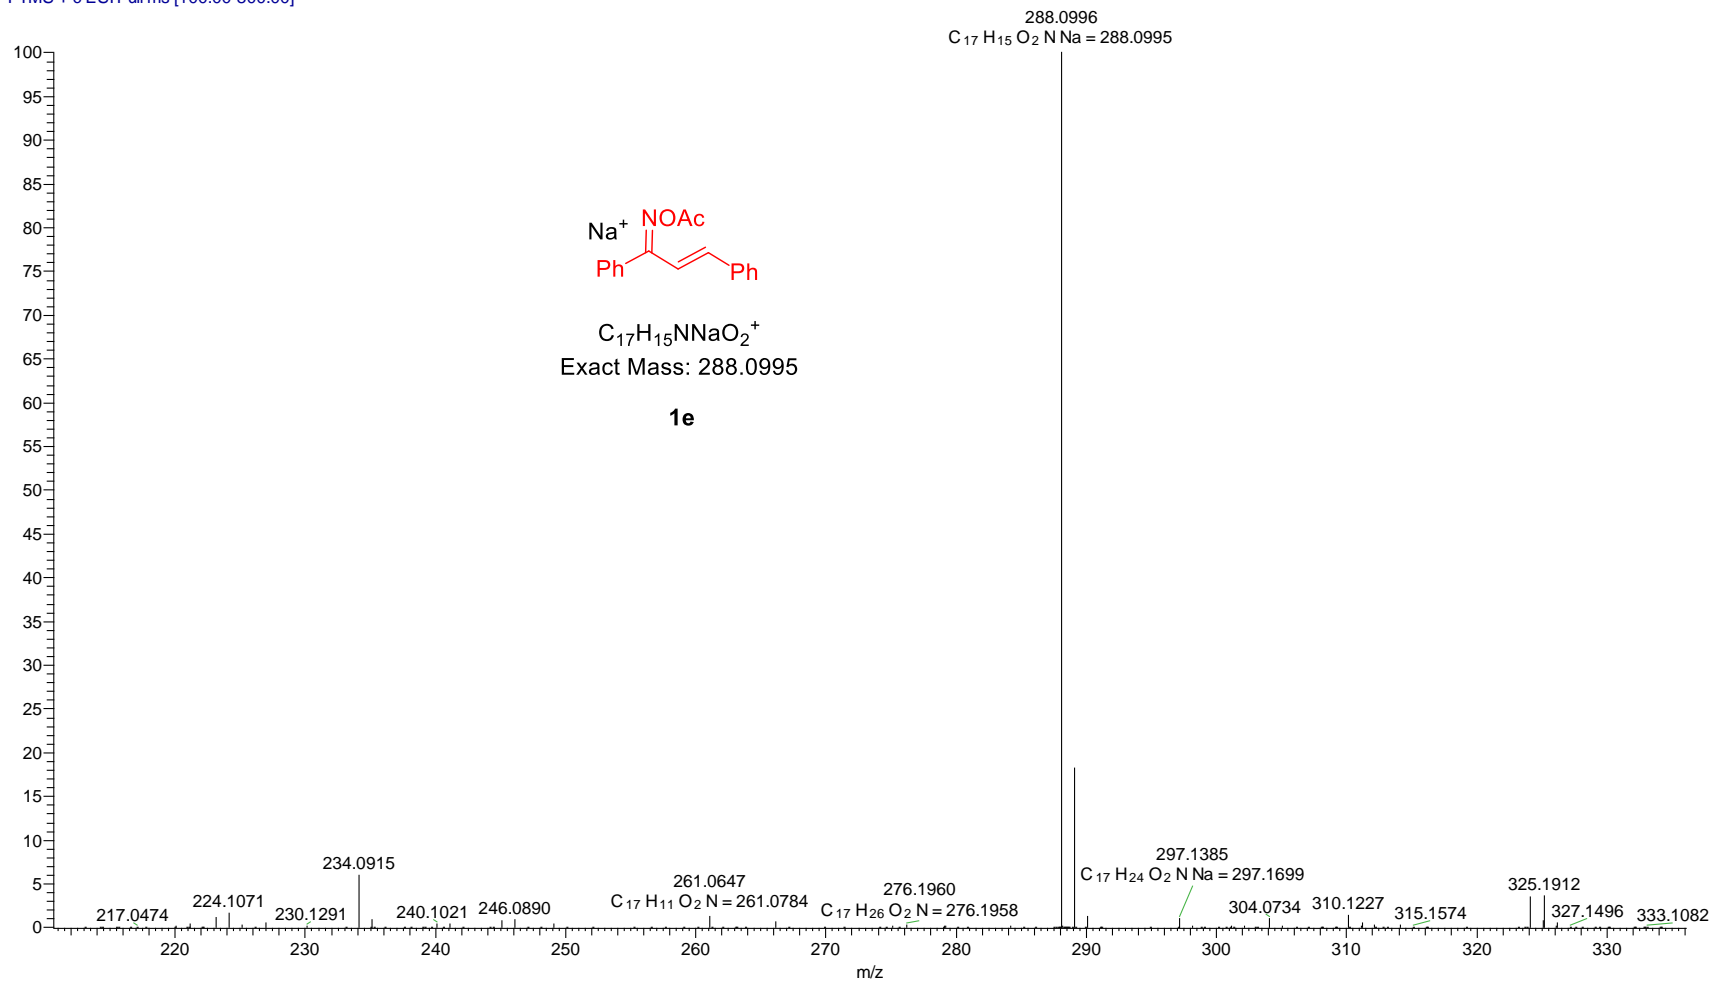

Figure S102. HRMS of substrate **1e**

BSJ-003 #53 RT: 0.96 AV: 1 NL: 1.12E6  
T: FTMS + c ESI Full ms [50.00-800.00]

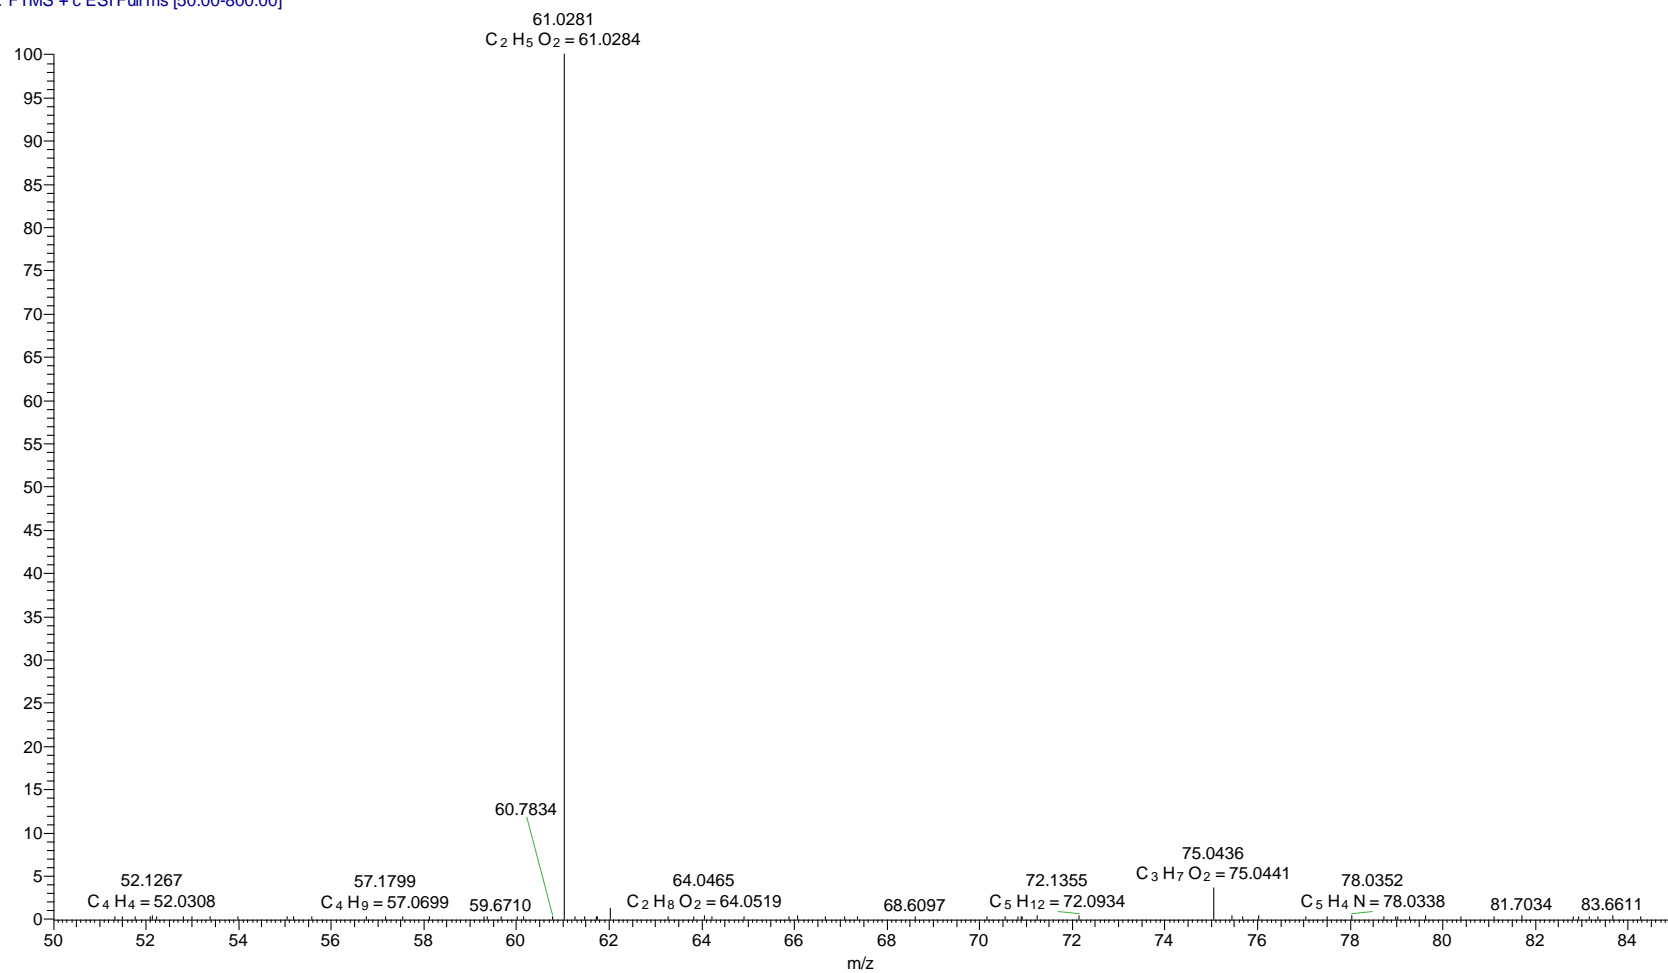

Figure S103. HRMS of HOAc

1 #45 RT: 0.86 AV: 1 NL: 3.78E3  
T: FTMS + c ESI Full ms [100.00-800.00]

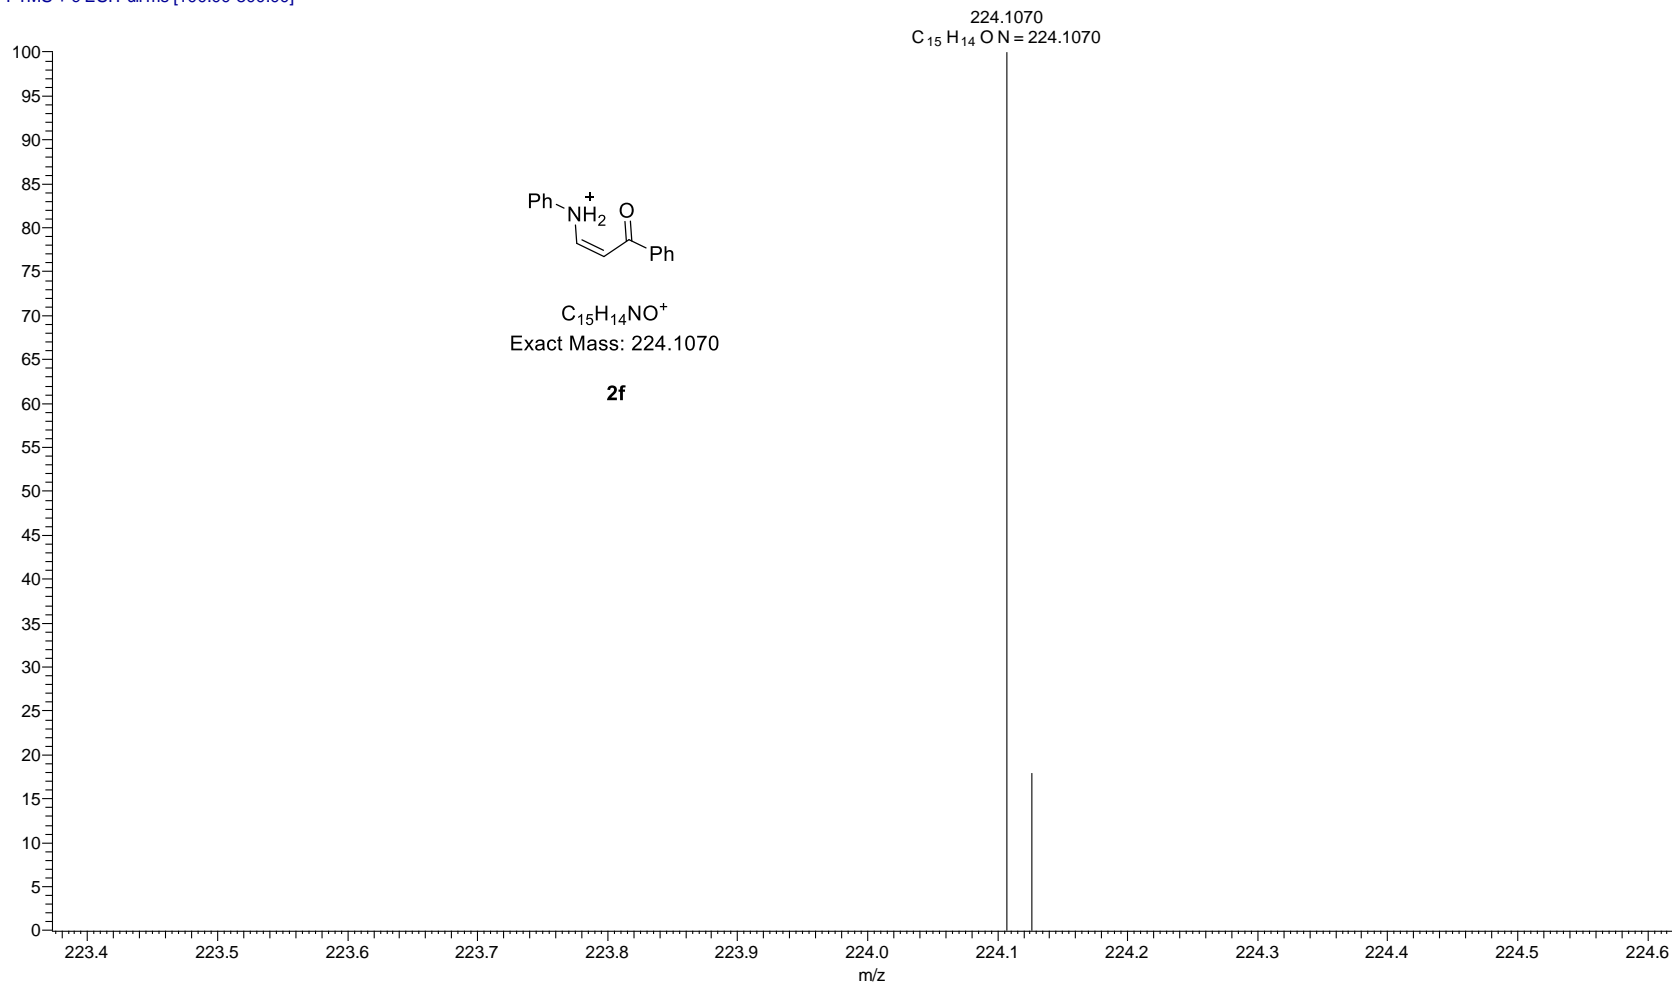

Figure S104. HRMS of substrate **2f**

1 #52 RT: 0.98 AV: 1 NL: 5.11E6  
T: FTMS + c ESI Full ms [100.00-800.00]

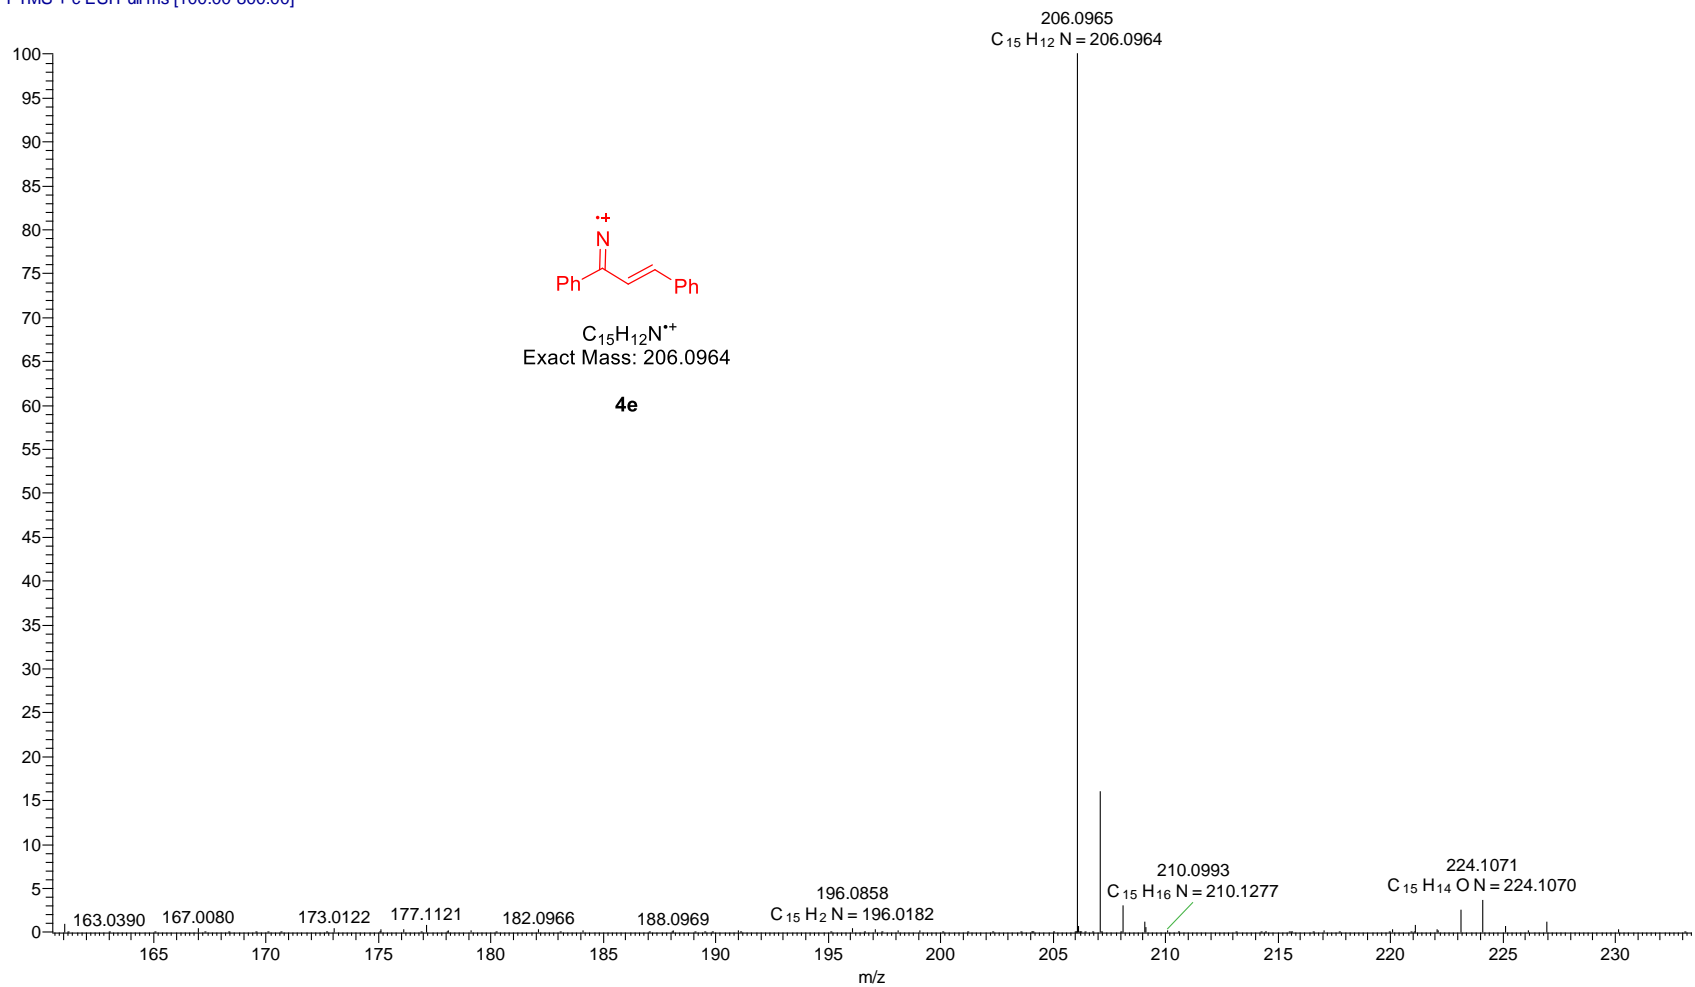

Figure S105. HRMS of intermediate **4e**



1 #32 RT: 0.64 AV: 1 NL: 1.86E7  
T: FTMS + c ESI Full ms [100.00-800.00]

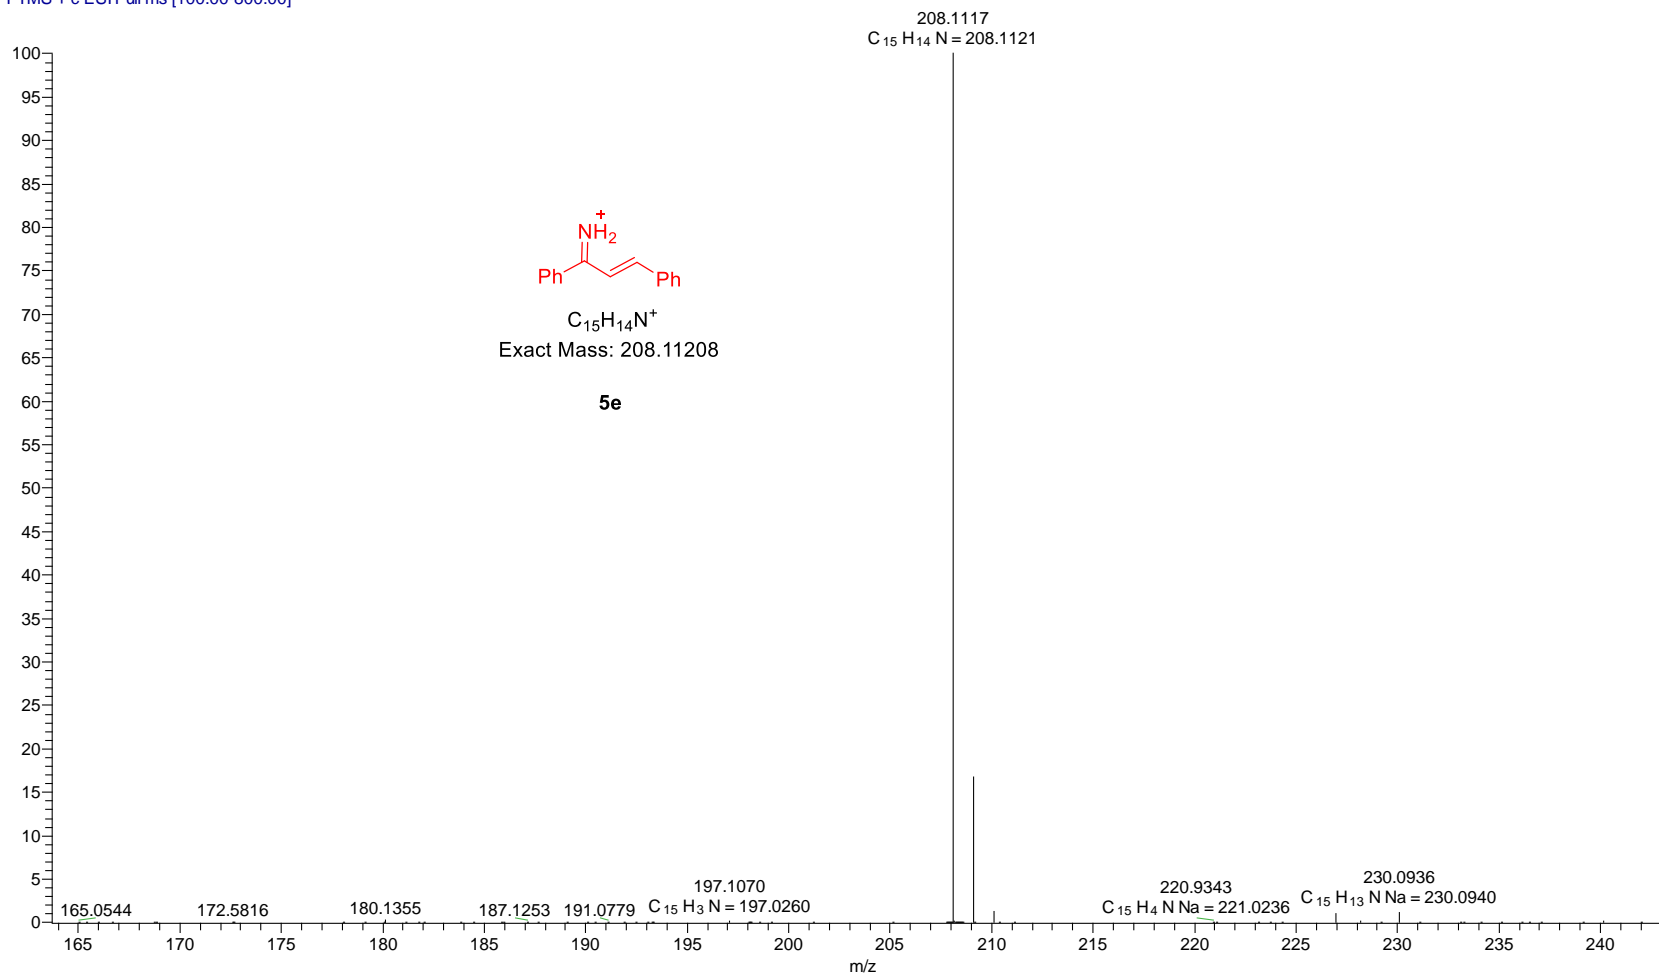

Figure S106. HRMS of intermediate **5e**

1 #50 RT: 0.95 AV: 1 NL: 1.82E4  
T: FTMS + c ESI Full ms [100.00-800.00]

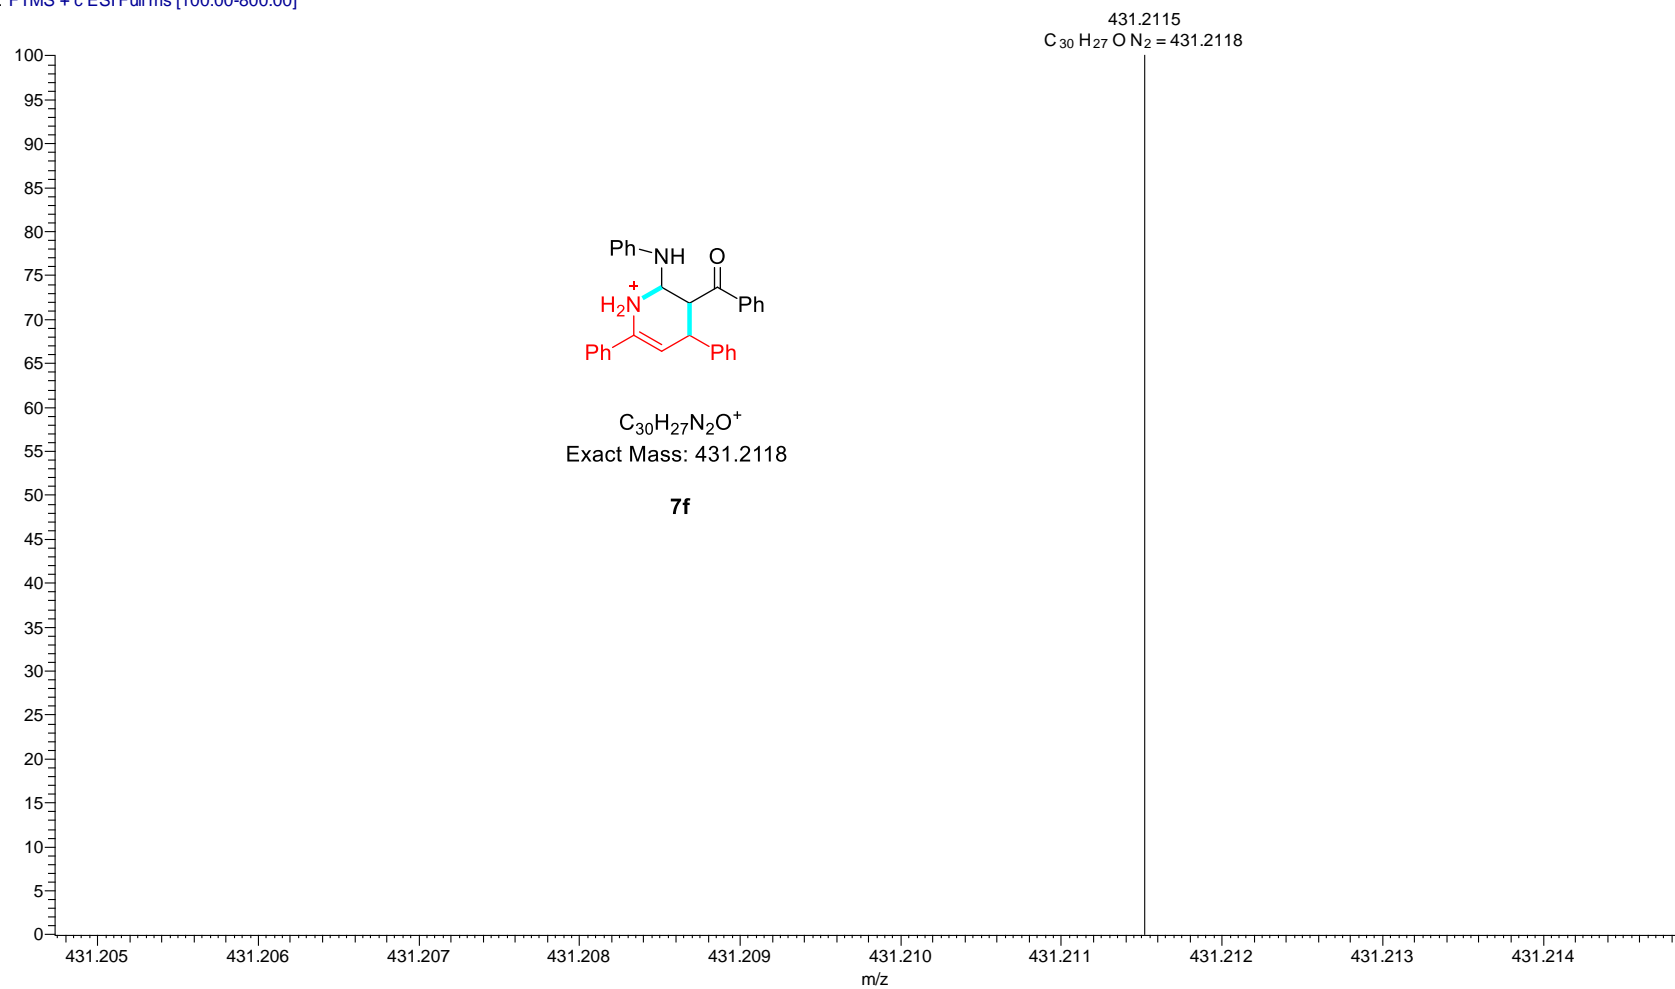

**Figure S107.** HRMS of intermediate **7f**

1 #94 RT: 1.70 AV: 1 NL: 1.48E6  
T: FTMS + c ESI Full ms [100.00-800.00]

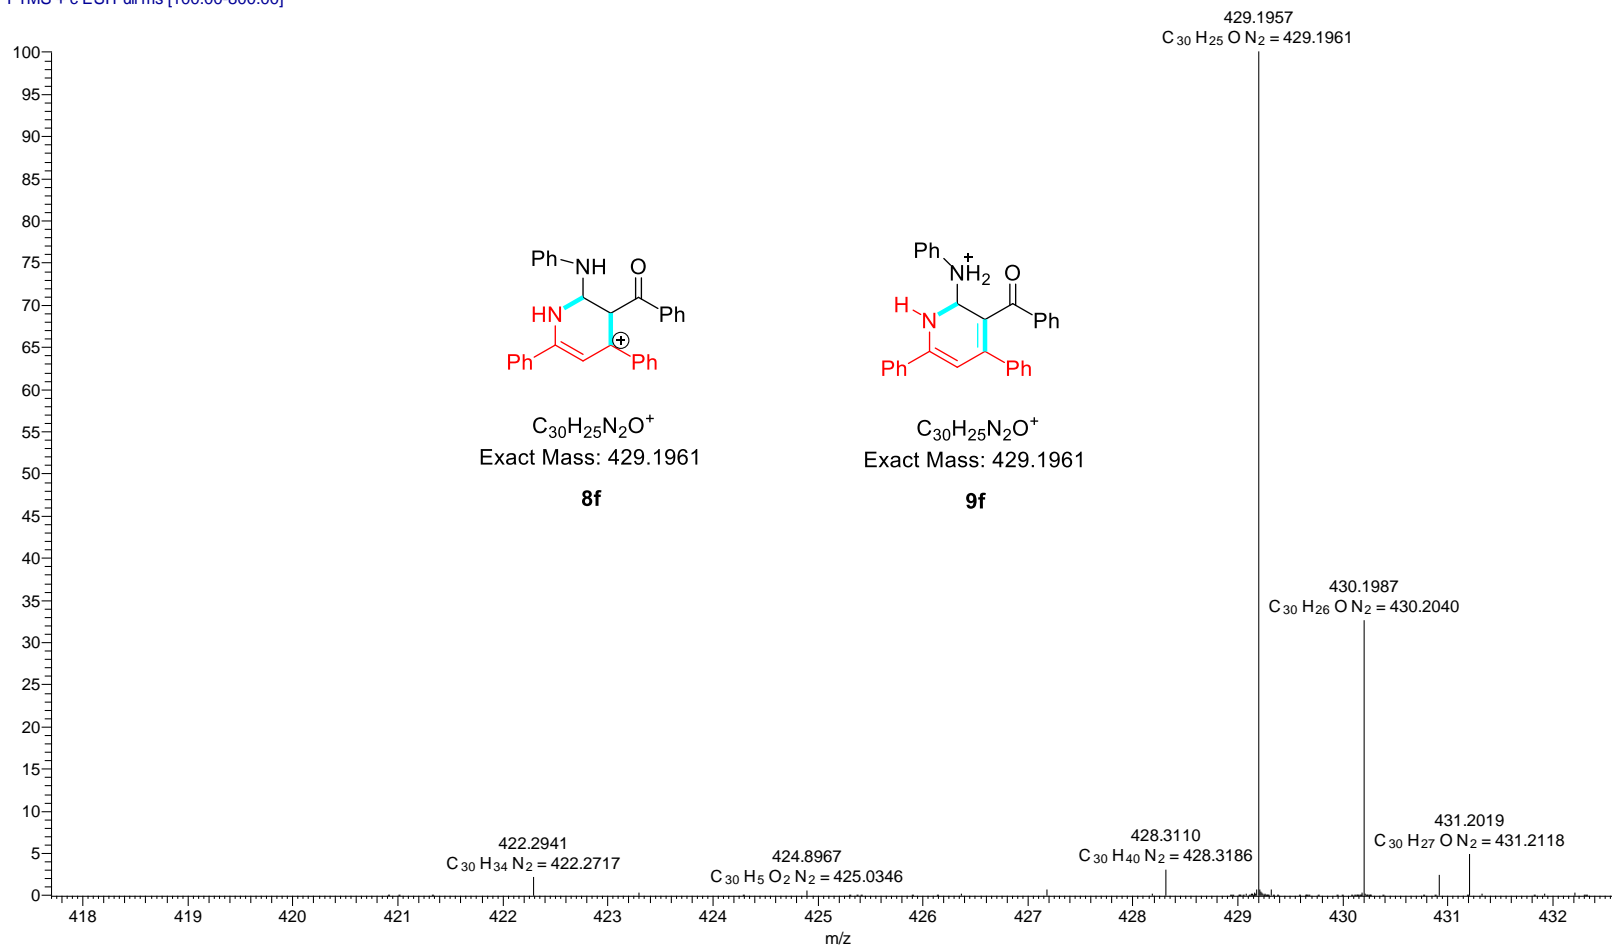

Figure S108. HRMS of intermediate **8f** or **9f**

1 #58 RT: 1.07 AV: 1 NL: 7.39E6  
T: FTMS + c ESI Full ms [100.00-800.00]

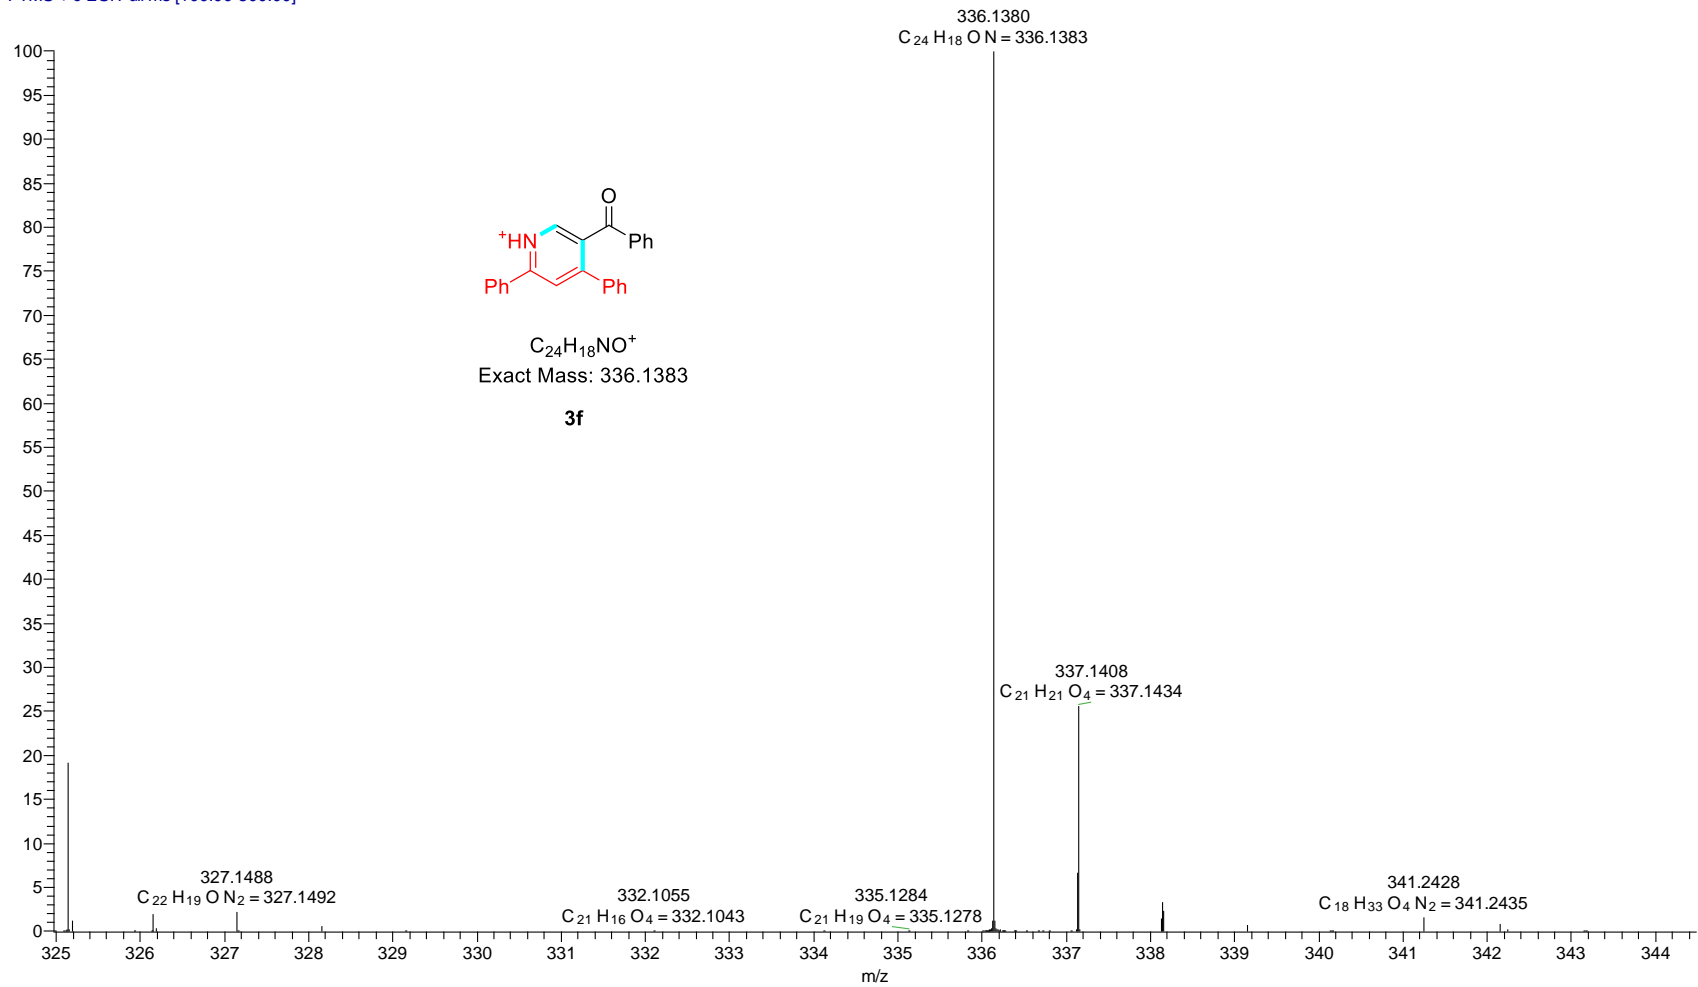

Figure S109. HRMS of the target compound **3f**

## References and Notes

1. I. Erray, F. Rezgui, J. Oble, G. Poli, Microwave-Assisted Palladium-Catalyzed Allylation of  $\beta$ -Enaminones, *Synlett*, 2014, **25**, 2196–2200.
2. Miao, C.-B.; Qiang, X.-Q.; Xu, X.; Song, X.-Q.; Zhou, S.-Q.; Lu, X.; Yang, H.-T. Synthesis of Stable N–H Imines with a Benzo[7,8]indolizine Core and Benzo[7,8]indolizino[1,2-c]quinolines via Copper-Catalyzed Annulation of  $\alpha,\beta$ -Unsaturated O-Acyl Ketoximes with Isoquinolinium N-Ylides. *Org. Lett.*, 2022, **24**, 3828–3833.
3. CCDC 2260760 contains the supplementary crystallographic data for compounds **3u**. These data can be obtained free of charge from The Cambridge Crystallographic Data Center via [www.ccdc.cam.ac.uk/data\\_request/cif](http://www.ccdc.cam.ac.uk/data_request/cif)
